# Supplementary material for: A Methylotrophic Bacterium Growing with the Antidiabetic Drug Metformin as Its Sole Carbon, Nitrogen and Energy Source
Source: Microorganisms. 2022 Nov 21;10(11):2302. doi: 10.3390/microorganisms10112302 (PMC9699525; doi:10.3390/microorganisms10112302)
Supplement: Supplementary file 1 [file microorganisms-10-02302-s001.zip › chaignaud_supplementary_tables.xlsx]

## Sheet: SupTable1
Supplementary Table S1. Biolog GEN III MicroplateTM data for Aminobacter niigataensis strain MD1
			Present work			Reference [53]
	Biolog plate position	Guild	Strain MD1	Strain MD11	A. aganoensis DSM 7051T	A. niigataensis DSM 7050T	A. aganoensis DSM 7051T	Comment
Carbon source
Dextrin	A2	Polymer	1	0.5	1	1	1
D-Maltose	A3	Carbohydrate	1	1		1	1	Difference between A. niigataensis strain MD1 and A. aganoensis, this work
D-Trehalose	A4	Carbohydrate	1	1	0.5	1	1
D-Cellobiose	A5	Carbohydrate	0	0	0	0	0
Gentiobiose	A6	Carbohydrate	0	0	0	0	0
Sucrose	A7	Carbohydrate	1	1	0.5	1	1
D-Turanose	A8	Carbohydrate	0.5	1	0.5	1	1
Stachyose	A9	Carbohydrate	0	0	0	0	0
D-Raffinose	B1	Carbohydrate	0	0	0	0	0
α-D-Lactose	B2	Carbohydrate	0	0	0	0	0
D-Melibiose	B3	Carbohydrate	0	0	0	0	0
β-Methyl-D-glucoside	B4	Carbohydrate	0	0	0	0.5	0.5
D-Salicin	B5	Carbohydrate	0	0	0	1	0	Difference between A. niigataensis and A. aganoensis in Artuso et al. (2021a) [53]
N-Acetyl-D-glucosamine	B6	Carbohydrate	1	1	1	1	1
N-Acetyl-β-D-mannosamine	B7	Carbohydrate	0	0	0	1	1
N-Acetyl-D-galactosamine	B8	Carbohydrate	0	0	0	0	0
N-Acetyl neuraminic acid	B9	Carbohydrate	0	0	0	0	0
α-D-Glucose	C1	Carbohydrate	1	1	1	1	1
D-Mannose	C2	Carbohydrate	1	1	1	1	1
D-Fructose	C3	Carbohydrate	1	1	1	1	1
D-Galactose	C4	Carbohydrate	1	1	1	1	1
3-Methyl glucose	C5	Carbohydrate			0.5	1	1
D-Fucose	C6	Carbohydrate	1	1	0	1	1	Difference between A. niigataensis strain MD1 and A. aganoensis, this work
L-Fucose	C7	Carbohydrate	1	1	1	1	1
L-Rhamnose	C8	Carbohydrate	0.5	0.5	0	0	0
Inosine	C9	Miscellaneous	0.5			1	1
D-Sorbitol	D1	Carbohydrate	1		1	1	1
D-Mannitol	D2	Carbohydrate	1	1	1	1	1
D-Arabitol	D3	Carbohydrate	1	1	1	1	1
myo-Inositol	D4	Carbohydrate	0.5	1	1	1	1
Glycerol	D5	Miscellaneous	1	1	1	1	1
D-Glucose-6-PO4	D6	Carbohydrate	0	0	0	0	0
D-Fructose-6-PO4	D7	Carbohydrate	0	0	0	0	0.5
D-Aspartic acid	D8	Aminoacid	0	0	0	0	0
D-Serine	D9	Aminoacid	0	0	0	0	0
Gelatin	E1	Polymer	0	0	0	0	0
Glycyl-L-proline	E2	Aminoacid	0	1	1	1	1
L-Alanine	E3	Aminoacid	1	1	1	1	1
L-Arginine	E4	Aminoacid	1	1	1	1	1
L-Aspartic acid	E5	Aminoacid	0	0.5	1	1	1
L-Glutamic acid	E6	Aminoacid	0.5	1	1	1	1
L-Histidine	E7	Aminoacid	1	1	1	1	1
L-Pyroglutamic acid	E8	Aminoacid	0	0	0	0	0
L-Serine	E9	Aminoacid	0.5	1	1	1	1
Pectin	F1	Carbohydrate	1	0.5	0.5	1	1
D-Galacturonic acid	F2	Carboxylic acid	0	0	0	0	0.5
L-Galactonic acid lactone	F3	Carboxylic acid	0	0	0	0	0
D-Gluconic acid	F4	Carboxylic acid	0	0	0	0	0
D-Glucuronic acid	F5	Carboxylic acid	0	0	0	0	0
Glucuronamide	F6	Polymer	0	0	0	0	0
Mucic acid	F7	Carboxylic acid	0	0	0	0	0
Quinic acid	F8	Carboxylic acid	0	0	0	0	0
D-Saccharic acid	F9	Carboxylic acid	0	0	0	0	0
p-Hydroxy-phenylacetic acid	G1	Carboxylic acid	0	0	0	0	0
Methyl pyruvate	G2	Carbohydrate	0	0.5	0.5	1	1
D-Lactic acid methyl ester	G3	Miscellaneous	0	0.5	0.5	0.5	1
L-Lactic acid	G4	Carboxylic acid	1	1	1	1	1
Citric acid	G5	Carboxylic acid	0	0	0	0	0
α-Keto-glutaric acid	G6	Carboxylic acid	0	0	0	0	0
D-Malic acid	G7	Carboxylic acid	0	0	0	0	0
L-Malic acid	G8	Carboxylic acid	0	0	0	0	0
Bromo-succinic acid	G9	Carboxylic acid	0	0	0	0	0
Tween 40	H1	Polymer	0	0	0	1	1
γ-Amino-butryric acid	H2	Aminoacid	0	0.5	0.5	1	1
α-Hydroxy-butyric acid	H3	Carboxylic acid	0	0	0.5	0	1	Difference between A. niigataensis and A. aganoensis in Artuso et al. (2021a) [53]
β-Hydroxy-D,L-butyric acid	H4	Carboxylic acid	0	0	0	0.5	1
α-Keto-butyric acid	H5	Carboxylic acid	0	0	1	0	1	Difference between A. niigataensis and A. aganoensis, this work and Artuso et al. (2021a) [53]
Acetoacetic acid	H6	Carboxylic acid	1	0.5	0.5	1	1
Propionic acid	H7	Carboxylic acid	1	1	1	1	1
Acetic acid	H8	Carboxylic acid	1	1	1	1	1
Formic acid	H9	Carboxylic acid	0.5	1	1	1	1
Chemical sensitivity test
pH 6	A11	pH	0.5	1	1	1	1
pH 5	A12	pH	0	0	0	0	0
1% NaCl	B10	Osmolite	1	0.5	1	1	1
4% NaCl	B11	Osmolite	0	0	0	0	0
8% NaCl	B12	Osmolite	0	0	0	0	0
1% Sodium lactate	C10	Chemical inhibitor	0.5	0.5	1	1	1
Fusidic acid	C11	Antimicrobial	0	0	0	0	0
D-Serine	C12	Chemical inhibitor	0	0	0	0	0
Troleandomycin	D10	Antimicrobial	0	0	0	1	1
Rifamycin SV	D11	Antimicrobial	0	0	0	1	1
Minocycline	D12	Antimicrobial	0	0	0.5	0	0
Lincomycin	E10	Antimicrobial	0.5	1	1	1	1
Guanidine HCl	E11	Chemical inhibitor	0.5	0.5	0.5	1	1
Niaproof 4	E12	Chemical inhibitor	0	0	0	0	0
Vancomycin	F10	Antimicrobial	0	0	0	0.5	0.5
Tetrazolium violet	F11	Chemical inhibitor	0	0	0	1	1
Tetrazolium blue	F12	Chemical inhibitor	1	1	1	1	1
Nalidixic acid	G10	Antimicrobial	1	1	1	1	1
Lithium chloride	G11	Chemical inhibitor	0	0	0	1	0	Difference between A. niigataensis and A. aganoensis in [53]
Potassium tellurite	G12	Antimicrobial	1	1	1	1	1
Aztreonam	H10	Antimicrobial	0.5	0.5	1	1	1
Sodium butyrate	H11	Chemical inhibitor	0	0	0	0.5	0
Sodium bromate	H12	Chemical inhibitor	0	0	0	0	0
1 Analysis carried out by the Identification Service, Leibniz-Institute DSMZ

## Sheet: SupTable2
Supplementary Table S2. Identified fatty acids of Aminobacter niigataensis MD1
Fatty acid	Percent	Total
12:0 3OH	0.47749	0.49
14:0	0.389788	0.4
15:0 ISO	1.56889	1.61
15:1 w8c	0.613915	0.63
16:1 w7c/15 iso 2OH	2.54336	2.61
16:0	11.7618	12.07
17:0 ISO	1.4617	1.5
18:1 w7c	70.0838	71.92
18:0	3.01111	3.09
11 methyl 18:1 w7c	4.98928	5.12
19:0 CYCLO w8c	0.555447	0.57
15:0 ISO 2OH/16:1 w7c	2.54336	2.61
Total	100	102.62

## Sheet: SupTable3
Supplementary Table S3. Quantification of metformin and guanylurea by LC-MS/MS.
Compound	Formula	Molar mass (g)	Fragments (m/z)	Collision energy (eV)	LoD a	LoQ	Relative error (%)
					(ng/L)	(ng/L)
Metformin	C4H11N5	129.16	71.14/60.17	22/14	40	127	2.4
Guanylurea	C2H6N4O	102.1	86.08/60.16	13/10	351	1063	6.1
a Calibration range : 1-40 mg/L

## Sheet: SupTable4
Supplementary Table S4. DNA-DNA hybridisation analysis
Comparison of strain MD1 with	GGDH (% HSP length)1	Jspecies (ANIb, %)2	Experimental (duplicates, %)	Unique MD1 genes (%)3	Reference
A. niigataensis DSM 7050T	82 [79-85]	98	69.3-72.8	781	[53]
A. sp. MSH1	80 [77-83]	97	n.d.4	634	[36]
A. aganoensis DSM 7051T	41 [38-43]	89	51.2-56.8	1046	[53]
A. sp. Root100	41 [39-44]	90	n.d.4	1160	[35]
1 Reference [47], https://ggdc.dsmz.de/ggdc.php#. Values determined with formula 2 applicable to draft genomes (sum of all identities found in high-scoring pairs (HSPs) divided by overall HSP length). Model-based confidence intervals are given in square brackets.
2 Reference [48], http://jspecies.ribohost.com/jspeciesws. ANIb: Average Nucleotide Identity based on BLAST; Positive if >95%
3 Strain MD1 CDS without homologs in the considered genome sequence using the MicroScope Phyloprofile exploration tool (https://mage.genoscope.cns.fr/microscope/compgenomics/ phyloprofil.php?) using default parameters (minLrap > 0.8, identity >35%). Strain MD1 genes not found in at least one of the 4 considered closely related genomes: 1419; strain MD1 genes not found in any of the 4 considered c…
4 n.d., not determined

## Sheet: SupTable5
Supplementary Table S5. Comparative transcriptomics data.
										Significant difference (adj. p-value ≤0.05)
M: metformin; D: dimethylamine; S: sucrose growth condition										Significantly higher in metformin condition (log2FC ≥ 1)
M sense/antisense average: average number of reads per replicate in the metformin condition										Significantly higher in dimethylamine condition (log2FC ≥ 1)
										Significantly higher in sucrose condition (log2FC ≥ 1)
Identifier	Product	Begin	End	Length	Frame	SbaseMean	M baseMean	MS NARC	MS log2FC	MS padj	S baseMean	D baseMean	DS NARC	DS log2FC	DS padj	D baseMean	M baseMean	MD NARC	MD log2FC	MD padj	Label	M sense average	M antisense average	M sense total	M antisense total	check
AMD1_0001	protein of unknown function	197	736	540	-1	45	24	34	-0.73	0.0282	42	31	36	-0.33	0.32	30	22	26	-0.23	0.38	AMD1_0001	23.6667	4204	71	12612
AMD1_0002	protein of unknown function	439	606	168	1	5583	3874	4729	-0.5	0.00078	5213	5773	5493	0.13	0.67	5598	3539	4568	-0.57	0.00807	AMD1_0002	3772.33	13.6667	11317	41
AMD1_0003	Chromosomal replication initiator protein DnaA	731	2263	1533	2	2737	2580	2658	-0.0812	0.67	2556	2987	2771	0.21	0.19	2896	2356	2626	-0.27	0.0402	AMD1_0003	2511.67	70.3333	7535	211
AMD1_0004	beta sliding clamp	2466	3584	1119	3	3699	3942	3820	0.0884	0.57	3454	3291	3373	-0.0665	0.72	3192	3600	3396	0.16	0.26	AMD1_0004	3844.33	74.3333	11533	223
AMD1_0005	DNA replication and repair protein RecF	3598	4788	1191	1	592	593	592	0.00472	0.99	553	656	605	0.23	0.26	637	542	589	-0.2	0.26	AMD1_0005	577	27.6667	1731	83
AMD1_0006	Putative adenylyltransferase/sulfurtransferase MoeZ	4841	5599	759	2	213	236	225	0.13	0.54	199	199	199	-0.00727	0.98	193	216	204	0.13	0.5	AMD1_0006	230	6.33333	690	19
AMD1_0007	Putative acetyltransferase	5602	6081	480	1	126	145	136	0.18	0.46	118	138	128	0.21	0.39	134	132	133	-0.0121	0.97	AMD1_0007	141.333	6	424	18
AMD1_0008	AcnX domain-containing protein	6078	7331	1254	3	199	184	192	-0.1	0.68	186	196	191	0.062	0.83	190	168	179	-0.13	0.57	AMD1_0008	179.333	13.6667	538	41
AMD1_0009	conserved protein of unknown function	7328	7753	426	2	182	137	159	-0.37	0.0795	170	143	156	-0.23	0.3	138	125	132	-0.1	0.66	AMD1_0009	133	84	399	252
AMD1_0010	Glyoxylate reductase	7814	8815	1002	-1	2552	2720	2636	0.0894	0.52	2383	2427	2405	0.0269	0.89	2354	2485	2420	0.0693	0.66	AMD1_0010	2651.67	231.667	7955	695
AMD1_0011	SH3 domain protein	8976	9533	558	3	1576	1402	1489	-0.16	0.31	1472	1167	1319	-0.32	0.0374	1131	1280	1206	0.16	0.28	AMD1_0011	1365	154.333	4095	463
AMD1_0012	Iron-responsive regulator Irr	9637	10062	426	-2	2265	2210	2237	-0.0352	0.83	2115	2406	2261	0.18	0.25	2334	2018	2176	-0.19	0.18	AMD1_0012	2152.67	501.333	6458	1504
AMD1_0013	beta-hydroxyacyl-acyl carrier protein dehydratase/isomerase	10314	10835	522	3	3785	3967	3876	0.0649	0.67	3535	4350	3942	0.29	0.0451	4219	3623	3921	-0.2	0.19	AMD1_0013	3862.33	39.6667	11587	119
AMD1_0014	beta-ketoacyl-[acyl carrier protein] synthase I	10866	12089	1224	3	3672	3838	3755	0.0619	0.67	3429	4037	3733	0.23	0.15	3915	3505	3710	-0.14	0.38	AMD1_0014	3745	57.6667	11235	173
AMD1_0015	Enoyl-[acyl-carrier-protein] reductase [NADH] 2	12100	12912	813	1	2040	2032	2036	-0.00554	0.98	1905	2178	2042	0.19	0.26	2112	1857	1984	-0.17	0.26	AMD1_0015	1978.67	42.3333	5936	127
AMD1_0016	Bacteriophytochrome cph2	13104	14642	1539	3	2095	3036	2565	0.52	1.46e-07	1956	1831	1893	-0.0899	0.56	1776	2773	2275	0.61	5.78e-07	AMD1_0016	2957.67	90.3333	8873	271
AMD1_0017	Ribosomal RNA small subunit methyltransferase C	14653	15666	1014	-2	258	238	248	-0.11	0.61	241	281	261	0.21	0.28	273	217	245	-0.29	0.0999	AMD1_0017	231.667	184	695	552
AMD1_0018	polynucleotide phosphorylase	15902	18049	2148	-1	8207	10200	9215	0.3	0.0775	7666	11500	9586	0.55	0.0031	11200	9336	10200	-0.22	0.2	AMD1_0018	9962.67	127.667	29888	383
AMD1_0019	30S ribosomal subunit protein S15	18421	18690	270	-2	7367	10300	8819	0.45	0.0147	6881	9724	8303	0.46	0.0344	9430	9383	9407	-0.00623	0.99	AMD1_0019	9978.33	100	29935	300
AMD1_0020	Magnesium transport protein CorA	18853	19947	1095	-2	626	654	640	0.0592	0.79	585	729	657	0.3	0.13	707	597	652	-0.2	0.24	AMD1_0020	636.667	43.3333	1910	130
AMD1_0021	tRNA pseudouridine synthase B	20011	20958	948	-2	1034	1039	1036	0.0072	0.98	965	1513	1239	0.63	3.41e-06	1468	949	1209	-0.57	0.00084	AMD1_0021	1009.33	25.3333	3028	76
AMD1_0022	Ribosome-binding factor A	20960	21367	408	-1	1018	1150	1084	0.16	0.48	951	1395	1173	0.53	0.00109	1353	1051	1202	-0.32	0.0482	AMD1_0022	1117.33	46	3352	138
AMD1_0023	translation initiation factor IF-2	21482	24100	2619	-1	16300	17800	17100	0.12	0.36	15300	17200	16200	0.17	0.22	16700	16300	16500	-0.0267	0.85	AMD1_0023	17367	152	52101	456
AMD1_0024	YlxR domain-containing protein	24097	24756	660	-2	7267	6429	6848	-0.17	0.23	6786	6591	6688	-0.0408	0.82	6392	5872	6132	-0.11	0.47	AMD1_0024	6269	41.3333	18807	124
AMD1_0025	transcription termination/antitermination protein NusA	24780	26372	1593	-3	7953	8157	8055	0.0378	0.86	7427	8374	7900	0.16	0.32	8122	7449	7786	-0.11	0.55	AMD1_0025	7948	84.3333	23844	253
AMD1_0026	Ribosome maturation factor RimP	26424	27056	633	-3	6140	5076	5608	-0.26	0.12	5733	5908	5821	0.0409	0.85	5731	4636	5184	-0.26	0.11	AMD1_0026	4941	28	14823	84
AMD1_0027	conserved protein of unknown function	27330	27494	165	3	3465	1356	2410	-1.13	0.00986	3233	2575	2904	-0.29	0.32	2498	1238	1868	-0.94	1.67e-05	AMD1_0027	1328	9.33333	3984	28
AMD1_0028	Uncharacterized 52.8 kDa protein in TAR-I ttuC' 3'region	27699	29213	1515	-3	830	1988	1409	0.53	0.23	775	2994	1885	1.35	0.0271	2901	1819	2360	-0.0665	0.67	AMD1_0028	1925	39.3333	5775	118
AMD1_0029	Tripartite tricarboxylate transporter TctB family protein	29241	29729	489	-3	-	-			-	408	2705	1556	2.09	0.00659	2618	2504	2561	-0.00487	0.98	AMD1_0029	2637.33	48.6667	7912	146
AMD1_0030	Tripartite tricarboxylate transporter family receptor	29726	30670	945	-1	-	-			-	1391	10400	5905	2.23	0.0057	10100	10800	10500	0.00354	0.97	AMD1_0030	11387.3	155.333	34162	466
AMD1_0031	ABC-type thiamine transport system, periplasmic component	30978	32078	1101	-3	295	357	326	0.26	0.15	276	269	273	-0.0365	0.89	261	327	294	0.28	0.12	AMD1_0031	347.667	93	1043	279
AMD1_0032	DNA-binding transcriptional activator QseB	32170	32844	675	1	142	143	142	0.00785	0.98	133	120	126	-0.14	0.65	116	131	123	0.12	0.62	AMD1_0032	139	51.3333	417	154
AMD1_0033	Sensor protein QseC	32844	34232	1389	3	443	353	398	-0.31	0.079	414	315	364	-0.37	0.0707	305	322	314	0.0631	0.79	AMD1_0033	343	107.333	1029	322
AMD1_0034	tRNA (guanine-N(7)-)-methyltransferase	34275	34976	702	-3	1882	2191	2036	0.21	0.24	1758	2311	2034	0.38	0.0215	2240	2001	2121	-0.14	0.34	AMD1_0034	2139.67	129.667	6419	389
AMD1_0035	S-adenosylmethionine synthase	34993	36276	1284	-2	9936	10600	10300	0.0885	0.54	9278	10800	10000	0.21	0.18	10500	9668	10100	-0.1	0.54	AMD1_0035	10333.3	111.333	31000	334
AMD1_0036	Uncharacterized HTH-type transcriptional regulator Smed_0045	36534	36953	420	-3	6521	7212	6867	0.13	0.55	6092	5776	5934	-0.0709	0.79	5601	6588	6095	0.19	0.31	AMD1_0036	7011	43.3333	21033	130
AMD1_0037	protein of unknown function	37005	37097	93	-3	1389	1637	1513	0.22	0.19	1297	1267	1282	-0.0307	0.91	1229	1496	1362	0.24	0.16	AMD1_0037	1593.67	88	4781	264
AMD1_0038	Apolipoprotein N-acyltransferase	37094	38686	1593	-1	3111	3519	3315	0.17	0.2	2906	2704	2805	-0.0999	0.55	2623	3214	2919	0.27	0.042	AMD1_0038	3430.67	282.333	10292	847
AMD1_0039	Magnesium and cobalt efflux protein CorC	38775	39845	1071	-3	5668	6240	5954	0.13	0.57	5293	7108	6200	0.41	0.00339	6893	5700	6296	-0.23	0.19	AMD1_0039	6058.67	95	18176	285
AMD1_0040	endoribonuclease YbeY	39873	40385	513	-3	1075	1037	1056	-0.0498	0.82	1004	962	983	-0.0583	0.77	933	947	940	0.0173	0.94	AMD1_0040	1007.33	14.3333	3022	43
AMD1_0041	PhoH-like protein	40404	41441	1038	-3	1989	2311	2150	0.21	0.0854	1858	1902	1880	0.0326	0.86	1844	2111	1978	0.17	0.22	AMD1_0041	2250.33	76	6751	228
AMD1_0042	isopentenyl-adenosine A37 tRNA methylthiolase	41471	42880	1410	-1	2765	3181	2973	0.19	0.17	2581	3126	2854	0.27	0.0791	3032	2905	2969	-0.0551	0.74	AMD1_0042	3101	126.333	9303	379
AMD1_0043	protein of unknown function	42931	43179	249	1	19	24	21	0.23	0.58	18	22	20	0.25	0.55	22	22	22	-0.00774	0.98	AMD1_0043	23.3333	142.667	70	428
AMD1_0044	Raf kinase inhibitor-like protein, YbhB/YbcL family	43095	43460	366	-3	548	498	523	-0.13	0.59	512	311	411	-0.69	4.88e-05	301	455	378	0.54	0.00148	AMD1_0044	484.333	44	1453	132
AMD1_0045	exported protein of unknown function	43588	43779	192	-2	256	222	239	-0.19	0.33	239	194	216	-0.28	0.14	188	203	195	0.0872	0.68	AMD1_0045	216.333	245.333	649	736
AMD1_0046	1-acyl-sn-glycerol-3-phosphate acyltransferase	44106	44906	801	-3	618	553	586	-0.15	0.37	577	692	635	0.24	0.2	671	506	588	-0.35	0.0411	AMD1_0046	538.333	86.3333	1615	259
AMD1_0047	Ribosomal-protein-S18p-alanine acetyltransferase	44939	45427	489	-1	381	370	375	-0.0395	0.86	355	484	420	0.42	0.0267	470	338	404	-0.42	0.017	AMD1_0047	360.667	32	1082	96
AMD1_0048	putative Inactive homolog of metal-dependent proteases, molecular chaperone	45424	46107	684	-2	465	482	473	0.0465	0.83	434	540	487	0.3	0.0526	524	440	482	-0.22	0.17	AMD1_0048	469	90	1407	270
AMD1_0049	malate synthase G	46369	48540	2172	-2	578	445	511	-0.36	0.0205	540	736	638	0.43	0.00339	714	406	560	-0.78	1.13e-07	AMD1_0049	434	10.3333	1302	31
AMD1_0050	Acetophenone carboxylase gamma subunit	48689	50713	2025	-1	323	291	307	-0.14	0.49	302	443	372	0.53	0.000957	429	266	348	-0.65	1.63e-05	AMD1_0050	284	18	852	54
AMD1_0051	conserved protein of unknown function	50803	51186	384	-2																AMD1_0051	3	68	9	204
AMD1_0052	protein of unknown function	51778	52059	282	-2	69	47	58	-0.48	0.0847	65	117	91	0.76	0.00716	114	43	78	-1.27	1.93e-05	AMD1_0052	46.3333	17.3333	139	52
AMD1_0053	Eukaryotic translation initiation factor 3 135 kDa subunit	52201	52380	180	-2	36	27	32	-0.3	0.41	34	53	43	0.53	0.12	51	25	38	-0.8	0.0149	AMD1_0053	26.6667	2	80	6
AMD1_0054	conserved protein of unknown function	52528	52992	465	1	20	13	17	-0.42	0.32	19	12	15	-0.53	0.21	11	12	12	0.0417	0.87	AMD1_0054	13	18.3333	39	55
AMD1_0055	conserved protein of unknown function	53094	53687	594	3	2315	2430	2373	0.0654	0.75	2162	1424	1793	-0.59	1.55e-05	1381	2220	1800	0.65	2e-06	AMD1_0055	2365	73	7095	219
AMD1_0056	protein of unknown function	53928	54101	174	3	43	31	37	-0.35	0.3	40	23	31	-0.66	0.0555	22	28	25	0.17	0.5	AMD1_0056	30.3333	39.6667	91	119
AMD1_0057	protein of unknown function	54507	54632	126	3	120	89	105	-0.37	0.17	112	93	103	-0.24	0.32	90	82	86	-0.0949	0.71	AMD1_0057	86.6667	38.3333	260	115
AMD1_0058	protein of unknown function	54660	54887	228	3	179	142	160	-0.3	0.2	167	146	156	-0.18	0.44	141	129	135	-0.0902	0.71	AMD1_0058	137.667	88	413	264
AMD1_0059	elongation factor 4	54949	56757	1809	-2	3016	3143	3080	0.057	0.76	2816	3632	3224	0.35	0.0596	3523	2870	3196	-0.25	0.14	AMD1_0059	3067.33	349	9202	1047
AMD1_0060	conserved protein of unknown function	56968	57555	588	1	20	19	19	-0.0341	0.95	18	14	16	-0.24	0.57	14	17	16	0.12	0.63	AMD1_0060	18.6667	12.3333	56	37
AMD1_0061	conserved protein of unknown function	57563	58480	918	2	27	19	23	-0.38	0.32	25	21	23	-0.19	0.65	21	17	19	-0.0971	0.71	AMD1_0061	18.3333	39	55	117
AMD1_0062	Transcriptional regulator AcuR	58454	59140	687	-1	71	85	78	0.22	0.44	67	61	64	-0.11	0.74	59	78	69	0.28	0.24	AMD1_0062	83.3333	29.6667	250	89
AMD1_0063	Homocysteine methyltransferase	59377	60318	942	1	38	31	35	-0.23	0.54	36	37	37	0.0494	0.9	36	28	32	-0.2	0.44	AMD1_0063	30.3333	17.6667	91	53
AMD1_0064	conserved protein of unknown function	60334	60654	321	-2	24	24	24	-0.00883	0.99	23	29	26	0.24	0.54	28	22	25	-0.15	0.57	AMD1_0064	23.6667	7.66667	71	23
AMD1_0065	conserved protein of unknown function	60706	61020	315	-2	34	39	36	0.14	0.74	32	42	37	0.33	0.32	41	35	38	-0.11	0.67	AMD1_0065	37.3333	15.3333	112	46
AMD1_0066	Putative acetyltransferase	61294	61890	597	1	529	545	537	0.0411	0.84	494	365	429	-0.42	0.0095	354	498	426	0.45	0.00395	AMD1_0066	531.333	9.66667	1594	29
AMD1_0067	conserved protein of unknown function	61920	62669	750	3	217	209	213	-0.0486	0.86	202	157	180	-0.34	0.13	152	191	172	0.26	0.22	AMD1_0067	203.667	16.6667	611	50
AMD1_0068	protein of unknown function	62793	62945	153	3	44	43	43	-0.0335	0.94	41	49	45	0.18	0.62	47	39	43	-0.14	0.59	AMD1_0068	41.6667	25.3333	125	76
AMD1_0069	protein of unknown function	63260	63679	420	-1	138	163	150	0.22	0.35	129	101	115	-0.32	0.18	98	149	123	0.53	0.00623	AMD1_0069	158.667	16	476	48
AMD1_0070	conserved exported protein of unknown function	64171	64479	309	1	33	19	26	-0.63	0.089	31	22	26	-0.39	0.29	21	17	19	-0.12	0.66	AMD1_0070	18.3333	6.33333	55	19
AMD1_0071	conserved membrane protein of unknown function	64645	64983	339	1	458	433	445	-0.0756	0.75	427	465	446	0.11	0.56	451	395	423	-0.16	0.36	AMD1_0071	422	18	1266	54
AMD1_0072	Amidohydrolase	65073	66065	993	-3	263	287	275	0.12	0.59	245	249	247	0.013	0.97	241	262	252	0.0991	0.64	AMD1_0072	279.333	90.3333	838	271
AMD1_0073	Putative phosphatase	66307	68292	1986	-2	74	91	82	0.25	0.36	69	87	78	0.27	0.31	84	83	83	-0.00793	0.98	AMD1_0073	88.6667	136	266	408
AMD1_0074	Phosphatidylglycerophosphatase B	68542	69228	687	1	258	269	263	0.0552	0.83	241	271	256	0.16	0.55	263	246	254	-0.0762	0.75	AMD1_0074	263	31.3333	789	94
AMD1_0075	Transcriptional regulator, y4mF family	69314	69556	243	2	1292	852	1072	-0.56	0.00371	1206	857	1032	-0.45	0.0619	832	778	805	-0.0678	0.79	AMD1_0075	831	6.33333	2493	19
AMD1_0076	Sulfate permease	69642	71363	1722	3	294	280	287	-0.0647	0.8	274	249	261	-0.13	0.53	241	255	248	0.0672	0.75	AMD1_0076	273.667	95.6667	821	287
AMD1_0077	Putative heat shock protein YegD	71515	72771	1257	-2	427	463	445	0.11	0.55	399	747	573	0.89	1.48e-10	724	423	574	-0.74	3.11e-07	AMD1_0077	452.333	64	1357	192
AMD1_0078	Homoserine/homoserine lactone efflux protein	72981	73598	618	3	351	413	382	0.22	0.25	328	509	419	0.61	5.15e-05	494	377	436	-0.35	0.0325	AMD1_0078	402.667	21.3333	1208	64
AMD1_0079	O-acetylserine sulfhydrylase A	73751	74731	981	2	2921	4417	3669	0.58	1.54e-07	2728	6823	4775	1.28	1.54e-09	6619	4035	5327	-0.63	0.00226	AMD1_0079	4302.33	69.6667	12907	209
AMD1_0080	RNA polymerase sigma factor	74768	76012	1245	-1	89	84	86	-0.0744	0.84	83	65	74	-0.3	0.3	63	76	70	0.18	0.46	AMD1_0080	81.6667	230	245	690
AMD1_0081	PhnB protein	76015	76365	351	-2	97	85	91	-0.15	0.66	90	61	76	-0.5	0.0449	60	78	69	0.26	0.29	AMD1_0081	83	14	249	42
AMD1_0082	conserved exported protein of unknown function	76590	77405	816	3	86	88	87	0.0247	0.95	80	50	65	-0.61	0.0276	49	80	65	0.6	0.0151	AMD1_0082	85.6667	98	257	294
AMD1_0083	conserved protein of unknown function	77589	77912	324	-3	284	277	281	-0.0338	0.92	265	484	375	0.8	0.00126	469	253	361	-0.8	0.00082	AMD1_0083	271.333	9	814	27
AMD1_0084	Rubrerythrin domain-containing protein	78102	79085	984	3	169	313	241	0.85	1.52e-05	157	432	295	1.4	8.97e-10	418	286	352	-0.44	0.0481	AMD1_0084	306.667	42.3333	920	127
AMD1_0085	Antibiotic biosynthesis monooxygenase	79238	79582	345	-1	89	39	64	-1.08	0.00023	83	62	72	-0.37	0.17	60	36	48	-0.54	0.0471	AMD1_0085	38.3333	47.6667	115	143
AMD1_0086	NIPSNAP domain-containing protein	79579	79911	333	-2																AMD1_0086	2.66667	33	8	99
AMD1_0087	conserved protein of unknown function	79976	80179	204	-1																AMD1_0087	3.33333	16.3333	10	49
AMD1_0088	Helix-turn-helix domain protein	80266	80946	681	1	195	190	193	-0.0346	0.91	182	178	180	-0.0306	0.92	173	174	173	0.00491	0.99	AMD1_0088	184.667	35	554	105
AMD1_0089	Glutathione S-transferase	81580	82200	621	-2	282	258	270	-0.11	0.67	264	200	232	-0.37	0.0961	194	236	215	0.24	0.19	AMD1_0089	251.667	307	755	921
AMD1_0090	conserved protein of unknown function	82282	82668	387	-2	315	285	300	-0.13	0.64	295	138	216	-1.02	0.000209	134	261	197	0.83	0.00229	AMD1_0090	277	14.3333	831	43
AMD1_0091	Neu5Ac permease	82665	84770	2106	-3	1077	1123	1100	0.0546	0.84	1006	479	743	-1.03	9.17e-08	465	1026	745	1.11	1.28e-12	AMD1_0091	1093	118.333	3279	355
AMD1_0092	TRAP transporter solute receptor, TAXI family	84858	85817	960	-3	1593	1727	1660	0.0996	0.76	1488	653	1071	-1.13	3.98e-06	633	1578	1105	1.29	1.05e-15	AMD1_0092	1684.33	54	5053	162
AMD1_0093	Transport permease protein	85991	87139	1149	-1	91	107	99	0.21	0.49	85	104	94	0.25	0.34	101	98	99	-0.0255	0.93	AMD1_0093	105	58.6667	315	176
AMD1_0094	Putative ABC transporter ATP-binding protein YbhF	87136	88053	918	-2	91	84	88	-0.0985	0.76	85	90	87	0.0638	0.85	87	77	82	-0.12	0.64	AMD1_0094	82.3333	71.3333	247	214
AMD1_0095	Putative efflux pump membrane fusion protein	88178	89128	951	-1	209	225	217	0.0982	0.68	195	259	227	0.38	0.0422	251	205	228	-0.24	0.19	AMD1_0095	219.333	19	658	57
AMD1_0096	Transcriptional regulator YbiH, TetR family	89125	89802	678	-2	108	109	108	0.00786	0.98	101	80	90	-0.3	0.29	77	99	88	0.27	0.23	AMD1_0096	106.333	16.3333	319	49
AMD1_0097	Inorganic triphosphatase	89881	90354	474	1	1153	1177	1165	0.0274	0.91	1076	797	936	-0.41	0.0183	772	1075	924	0.42	0.0126	AMD1_0097	1143.33	7	3430	21
AMD1_0098	CHAD domain protein	90351	91283	933	3	317	393	355	0.29	0.0834	296	229	263	-0.34	0.15	222	359	290	0.61	0.00308	AMD1_0098	382.667	27.6667	1148	83
AMD1_0099	conserved protein of unknown function	91335	92138	804	3	566	740	653	0.37	0.0038	529	501	515	-0.072	0.74	486	676	581	0.43	0.00557	AMD1_0099	722.333	46.3333	2167	139
AMD1_0100	conserved protein of unknown function	92243	93595	1353	2	283	267	275	-0.0758	0.77	264	214	239	-0.29	0.16	208	244	226	0.19	0.35	AMD1_0100	259.667	64.6667	779	194
AMD1_0101	conserved protein of unknown function	93631	93828	198	-2	223	245	234	0.12	0.58	209	164	186	-0.33	0.14	159	224	191	0.43	0.0275	AMD1_0101	239	8.33333	717	25
AMD1_0102	Heat-inducible transcription repressor HrcA	93852	94922	1071	-3	537	634	586	0.23	0.1	501	492	497	-0.0236	0.92	477	579	528	0.24	0.12	AMD1_0102	618.333	28.6667	1855	86
AMD1_0103	truncated RNase PH	95087	95803	717	2	1054	892	973	-0.23	0.19	984	1215	1099	0.29	0.12	1179	815	997	-0.49	0.00119	AMD1_0103	869.333	20	2608	60
AMD1_0104	lactoylglutathione lyase	95814	96224	411	3	466	421	444	-0.14	0.43	435	565	500	0.36	0.0169	548	385	466	-0.47	0.0011	AMD1_0104	410.667	7.66667	1232	23
AMD1_0105	dITP/XTP pyrophosphatase	96224	96871	648	2	307	296	301	-0.0499	0.82	287	380	333	0.39	0.018	369	270	319	-0.41	0.00807	AMD1_0105	288.333	14.3333	865	43
AMD1_0106	Heme chaperone HemW	96871	98037	1167	1	549	461	505	-0.24	0.14	513	618	565	0.25	0.16	599	421	510	-0.46	0.00688	AMD1_0106	448.333	164.333	1345	493
AMD1_0107	Putative acetyltransferase	98459	98938	480	-1	85	64	74	-0.34	0.26	79	133	106	0.69	0.00716	129	58	94	-1.07	4.19e-06	AMD1_0107	62.3333	45	187	135
AMD1_0108	Uncharacterized transporter in cobO 3'region	99041	99478	438	2	97	85	91	-0.17	0.54	91	96	94	0.0755	0.8	93	78	86	-0.2	0.37	AMD1_0108	83	92.6667	249	278
AMD1_0109	16S rRNA 2'-O-ribose C1402 methyltransferase	99717	100616	900	3	463	369	416	-0.31	0.0716	432	362	397	-0.24	0.23	351	337	344	-0.0482	0.82	AMD1_0109	359	6.66667	1077	20
AMD1_0110	conserved protein of unknown function	100609	100980	372	1	284	247	265	-0.19	0.36	265	220	242	-0.25	0.21	213	226	219	0.066	0.76	AMD1_0110	240.333	9	721	27
AMD1_0111	conserved protein of unknown function	101095	101325	231	1	225	231	228	0.0374	0.89	210	321	266	0.58	0.00103	312	211	261	-0.51	0.00132	AMD1_0111	225.333	8.66667	676	26
AMD1_0112	Acylphosphatase	101353	101637	285	-2	55	54	54	-0.0248	0.96	51	41	46	-0.27	0.43	40	49	45	0.18	0.49	AMD1_0112	52.3333	111	157	333
AMD1_0113	Kynurenine formamidase	101842	102669	828	1	180	156	168	-0.19	0.48	168	337	253	0.94	0.000252	327	143	235	-1.11	6.38e-06	AMD1_0113	152.333	226.333	457	679
AMD1_0114	Pentalenene oxygenase	102666	104036	1371	-3	459	496	477	0.1	0.67	428	503	466	0.22	0.34	488	453	471	-0.0842	0.7	AMD1_0114	485.333	118	1456	354
AMD1_0115	FMN-dependent NADPH-azoreductase	104216	104785	570	2	61	91	76	0.47	0.14	57	139	98	1.22	3.13e-06	135	83	109	-0.56	0.0239	AMD1_0115	89.3333	19.3333	268	58
AMD1_0116	Response regulator	104924	105358	435	2	310	212	261	-0.52	0.00604	290	195	243	-0.53	0.00912	189	193	191	0.0235	0.92	AMD1_0116	206.667	60.6667	620	182
AMD1_0117	Blue-light-activated histidine kinase	105380	107215	1836	-1	638	588	613	-0.11	0.52	596	627	612	0.0666	0.79	608	537	573	-0.15	0.46	AMD1_0117	574	123	1722	369
AMD1_0118	DNA gyrase subunit B	107594	110041	2448	2	4737	4732		-0.00136	1	4423	5020	4722	0.18	0.23	4869	4322	4596	-0.15	0.28	AMD1_0118	4618	184.333	13854	553
AMD1_0119	conserved protein of unknown function	110162	110371	210	2	487	542	515	0.14	0.41	455	498	477	0.12	0.54	483	495	489	0.0264	0.9	AMD1_0119	527.333	3.33333	1582	10
AMD1_0120	Methionine aminopeptidase	110368	111144	777	1	1182	1012	1097	-0.21	0.15	1104	1129	1116	0.0313	0.87	1095	924	1010	-0.21	0.18	AMD1_0120	984	14.3333	2952	43
AMD1_0121	DNA-binding transcriptional activator KdpE	111167	111859	693	-1	90	75	82	-0.23	0.4	84	54	69	-0.56	0.0488	53	68	60	0.25	0.31	AMD1_0121	72.6667	149.333	218	448
AMD1_0122	sensory histidine kinase KdpD	111856	114579	2724	-2	230	178	204	-0.34	0.0562	215	141	178	-0.57	0.00392	136	163	150	0.2	0.34	AMD1_0122	173.667	58.3333	521	175
AMD1_0123	K(+) transporting P-type ATPase subunit KdpC	114643	115212	570	-2	-	-			-	7.66	12	9.85	0.36	0.42	12	13	12	0.0378	0.88	AMD1_0123	13.6667	18.3333	41	55
AMD1_0124	K(+) transporting P-type ATPase subunit KdpB	115226	117298	2073	-1	12	18	15	0.31	0.48	12	25	18	0.69	0.14	24	17	21	-0.17	0.47	AMD1_0124	17.6667	37.3333	53	112
AMD1_0125	K(+) transporting P-type ATPase subunit KdpA	117336	119039	1704	-3	12	18	15	0.33	0.45	12	12	12	0.0261	0.96	12	16	14	0.15	0.53	AMD1_0125	17.3333	45.6667	52	137
AMD1_0126	protein of unknown function	119058	119432	375	3	28	23	26	-0.18	0.67	26	29	28	0.0671	0.88	28	21	25	-0.15	0.56	AMD1_0126	22.6667	5.66667	68	17
AMD1_0127	K(+) transporting P-type ATPase subunit KdpF (modular protein)	119074	119211	138	-2																AMD1_0127	1	14.3333	3	43
AMD1_0128	conserved protein of unknown function	119175	119255	81	-3																AMD1_0128	0.333333	8.66667	1	26
AMD1_0129	Glutathione S-transferase GST-6.0	119519	120124	606	-1	255	395	325	0.17	0.67	238	326	282	0.22	0.63	317	360	338	0.0189	0.91	AMD1_0129	395.667	14.3333	1187	43
AMD1_0130	Phosphopantothenoylcysteine decarboxylase / Phosphopantothenate--cysteine ligase	120249	121466	1218	-3	780	743	762	-0.0668	0.73	729	619	674	-0.23	0.13	600	679	640	0.16	0.34	AMD1_0130	725.333	15.6667	2176	47
AMD1_0131	Ribonuclease VapC28	121476	121877	402	-3	276	277		0.00149	1	258	228	243	-0.16	0.46	221	253	237	0.16	0.39	AMD1_0131	270	21.3333	810	64
AMD1_0132	conserved protein of unknown function	121877	122152	276	-1	551	786	669	0.47	0.016	514	595	555	0.19	0.41	577	718	647	0.26	0.19	AMD1_0132	770.333	14	2311	42
AMD1_0133	Ubiquinone biosynthesis monooxygenase UbiB	122223	123797	1575	-3	876	1099	988	0.31	0.0123	818	1438	1128	0.79	3.12e-08	1395	1004	1199	-0.43	0.00354	AMD1_0133	1069.33	46	3208	138
AMD1_0134	bifunctional 2-octaprenyl-6-methoxy-1,4-benzoquinone methylase and S-adenosylmethionine:2-DMK methyltransferase	123811	124587	777	-2	1570	1941	1756	0.3	0.0131	1466	2345	1905	0.66	7.06e-08	2274	1773	2024	-0.33	0.00823	AMD1_0134	1890.67	30	5672	90
AMD1_0135	Adenine deaminase	124697	125671	975	2	508	408	458	-0.3	0.0639	474	506	490	0.0871	0.72	490	373	432	-0.34	0.0511	AMD1_0135	398.333	76.6667	1195	230
AMD1_0136	uracil phosphoribosyltransferase	125776	126402	627	1	848	739	793	-0.18	0.42	792	722	757	-0.12	0.58	700	674	687	-0.0466	0.81	AMD1_0136	722	31.3333	2166	94
AMD1_0137	Clan AA aspartic protease	126505	127047	543	1	536	470	503	-0.18	0.32	501	328	415	-0.58	0.00169	318	429	374	0.38	0.027	AMD1_0137	457.333	34	1372	102
AMD1_0138	HTH-type transcriptional regulator YesS	127052	128062	1011	-1	303	348	325	0.18	0.44	283	358	321	0.32	0.11	347	317	332	-0.1	0.62	AMD1_0138	340.333	131.333	1021	394
AMD1_0139	Purine ribonucleoside efflux pump NepI	128081	129295	1215	2	38	41	39	0.071	0.86	36	50	43	0.41	0.18	49	37	43	-0.25	0.31	AMD1_0139	39.6667	31.3333	119	94
AMD1_0140	thymidine phosphorylase	129332	130651	1320	-1	452	354	403	-0.33	0.0328	422	254	338	-0.7	0.000126	246	323	285	0.33	0.0824	AMD1_0140	346	30	1038	90
AMD1_0141	Purine nucleoside phosphorylase 1	130928	131734	807	-1	348	315	332	-0.13	0.52	325	221	273	-0.53	0.00297	214	288	251	0.36	0.0465	AMD1_0141	308	72.3333	924	217
AMD1_0142	Cytidine deaminase	131731	132123	393	-2	175	149	162	-0.21	0.34	163	98	130	-0.68	0.00236	95	136	115	0.41	0.0652	AMD1_0142	144.667	14.6667	434	44
AMD1_0143	Guanosine ABC transporter permease protein NupQ	132126	133097	972	-3	401	411	406	0.035	0.88	374	286	330	-0.37	0.0258	278	376	327	0.38	0.0237	AMD1_0143	401.667	22.6667	1205	68
AMD1_0144	Predicted nucleoside ABC transporter, permease 1 component	133099	134238	1140	-2	603	566	584	-0.0846	0.7	563	352	458	-0.65	1.21e-05	342	517	429	0.54	0.000974	AMD1_0144	553	52.6667	1659	158
AMD1_0145	Guanosine import ATP-binding protein NupO	134235	135767	1533	-3	1348	1058	1203	-0.34	0.00639	1259	756	1007	-0.71	2.25e-06	733	966	850	0.36	0.0188	AMD1_0145	1031.67	62.3333	3095	187
AMD1_0146	Protein SlyX homolog	135932	136141	210	2	104	84	94	-0.28	0.25	97	77	87	-0.3	0.24	75	77	76	0.0231	0.93	AMD1_0146	81.6667	134	245	402
AMD1_0147	Putative enzyme related to lactoylglutathione lyase	136163	136534	372	-1	371	393	382	0.0797	0.74	346	345	345	-0.00514	0.98	334	359	347	0.0847	0.67	AMD1_0147	384.667	29.3333	1154	88
AMD1_0148	Predicted nucleoside ABC transporter, substrate-binding component	136637	137626	990	-1	3587	3436	3511	-0.0589	0.78	3350	2939	3144	-0.18	0.27	2849	3138	2994	0.12	0.46	AMD1_0148	3358.33	69.6667	10075	209
AMD1_0149	methionine sulfoxide reductase A	137821	138486	666	-2	631	543	587	-0.2	0.28	589	449	519	-0.36	0.0391	436	496	466	0.15	0.4	AMD1_0149	531	29.3333	1593	88
AMD1_0150	conserved protein of unknown function	138546	138866	321	-3	362	318	340	-0.18	0.34	338	407	373	0.25	0.22	394	291	342	-0.38	0.0373	AMD1_0150	310	3.66667	930	11
AMD1_0151	conserved membrane protein of unknown function	138958	139650	693	-2	682	731	706	0.0969	0.58	636	648	642	0.0243	0.92	629	668	648	0.0743	0.7	AMD1_0151	712.333	15.6667	2137	47
AMD1_0152	protein of unknown function	140207	140392	186	2	24	12	18	-0.68	0.12	22	29	25	0.29	0.46	28	11	19	-1.06	0.00734	AMD1_0152	11.6667	73	35	219
AMD1_0153	Hca operon transcriptional activator	140452	141435	984	-2	1669	1762	1716	0.075	0.66	1559	1144	1351	-0.43	0.00178	1109	1609	1359	0.5	0.000173	AMD1_0153	1718	109.333	5154	328
AMD1_0154	protein of unknown function	141437	141616	180	-1	390	471	431	0.25	0.15	364	249	307	-0.53	0.00188	242	430	336	0.79	1.16e-06	AMD1_0154	459	11.3333	1377	34
AMD1_0155	TRAP-type C4-dicarboxylate transport system, large permease component	141777	143057	1281	-3	776	954	865	0.29	0.0331	725	975	850	0.41	0.0105	945	872	908	-0.0995	0.58	AMD1_0155	929.667	127.667	2789	383
AMD1_0156	2,3-diketo-L-gulonate TRAP transporter small permease protein YiaM	143057	143662	606	-1	212	228	220	0.097	0.69	198	193	195	-0.0408	0.89	187	208	198	0.13	0.54	AMD1_0156	222.667	129.333	668	388
AMD1_0157	Extracytoplasmic solute receptor protein YiaO	143756	144754	999	-1	410	401	405	-0.0277	0.9	382	391	387	0.0297	0.9	380	366	373	-0.0411	0.84	AMD1_0157	391	246.667	1173	740
AMD1_0158	L-rhamnonate dehydratase	144789	145889	1101	-3	87	59	73	-0.48	0.11	81	74	77	-0.12	0.7	72	54	63	-0.27	0.27	AMD1_0158	57	93.3333	171	280
AMD1_0159	conserved protein of unknown function	146086	146190	105	-2	14	15	15	0.0521	0.91	13	18	15	0.29	0.5	17	14	16	-0.12	0.64	AMD1_0159	14.6667	45.3333	44	136
AMD1_0160	Uncharacterized ABC transporter ATP-binding protein YejF	146662	148347	1686	-2	902	779	840	-0.2	0.25	842	734	788	-0.19	0.23						AMD1_0160	762	123.667	2286	371
AMD1_0161	Oligopeptide transport system permease protein OppC	148349	149479	1131	-1	988	848	918	-0.21	0.13	922	795	859	-0.2	0.22	771	774	773	0.00289	0.99	AMD1_0161	826.333	205	2479	615
AMD1_0162	murein tripeptide ABC transporter/oligopeptide ABC transporter inner membrane subunit OppB	149472	150395	924	-3	1402	1513	1458	0.1	0.55	1310	1356	1333	0.0466	0.82	1315	1382	1348	0.0634	0.71	AMD1_0162	1476.33	152.667	4429	458
AMD1_0163	Oligopeptide ABC transporter, periplasmic oligopeptide-binding protein oppA (TC 3.A.1.5.1)	150439	152052	1614	-2	1331	1352	1342	0.0206	0.95	1244	896	1070	-0.45	0.012	869	1235	1052	0.43	0.0234	AMD1_0163	1326.67	271.667	3980	815
AMD1_0164	Glutathione S-transferase family protein	152095	152724	630	-2	405	377	391	-0.0909	0.74	378	346	362	-0.12	0.61	335	344	340	0.0305	0.9	AMD1_0164	369.667	260	1109	780
AMD1_0165	D-amino acid dehydrogenase small subunit	152800	154077	1278	-2	2085	2001	2043	-0.0547	0.84	1946	1948		-0.000265	1	1889	1827	1858	-0.0373	0.88	AMD1_0165	1956.33	30.3333	5869	91
AMD1_0166	Hippurate hydrolase	154216	155376	1161	-2	1165	1356	1260	0.2	0.38	1088	1125	1106	0.0453	0.83	1090	1238	1164	0.15	0.45	AMD1_0166	1329.67	38	3989	114
AMD1_0167	Oligopeptide ABC transporter, periplasmic oligopeptide-binding protein oppA (TC 3.A.1.5.1)	155489	157099	1611	-1	3636	3639		0.00109	1	3395	2887	3141	-0.22	0.2	2799	3322	3061	0.2	0.28	AMD1_0167	3566.33	417.667	10699	1253
AMD1_0168	protein of unknown function	156891	157457	567	-3	1579	1333	1456	-0.23	0.21	1475	1353	1414	-0.12	0.53	1312	1217	1264	-0.0891	0.66	AMD1_0168	1305	18	3915	54
AMD1_0169	4,5-dihydroxyphthalate decarboxylase	157274	158260	987	-1	2090	1975	2033	-0.0766	0.73	1951	2301	2126	0.23	0.19	2231	1804	2017	-0.27	0.1	AMD1_0169	1933	24.6667	5799	74
AMD1_0170	Putative HTH-type transcriptional regulator YdcR	158365	159696	1332	1	2142	2006	2074	-0.086	0.75	2000	2406	2203	0.25	0.21	2333	1832	2082	-0.29	0.13	AMD1_0170	1966.67	173.667	5900	521
AMD1_0171	Peptide ABC transporter	159814	160611	798	-2	181	183	182	0.0112	0.97	169	140	154	-0.25	0.29	135	167	151	0.23	0.25	AMD1_0171	178.667	618.333	536	1855
AMD1_0172	FAD-dependent oxidoreductase	160712	161995	1284	-1	314	281	297	-0.15	0.48	293	258	276	-0.18	0.42	250	256	253	0.0326	0.89	AMD1_0172	273	47	819	141
AMD1_0173	Aspartate aminotransferase	162018	163250	1233	-3	103	101	102	-0.0247	0.94	96	85	91	-0.16	0.57	83	92	87	0.11	0.64	AMD1_0173	98.6667	111.667	296	335
AMD1_0174	Succinate-semialdehyde dehydrogenase [NADP(+)]	163259	164773	1515	-1	21	17	19	-0.21	0.63	20	18	19	-0.0986	0.83	18	16	17	-0.0538	0.84	AMD1_0174	16.6667	2.33333	50	7
AMD1_0175	FAD-binding oxidoreductase	164816	166237	1422	-1	86	72	79	-0.22	0.44	80	68	74	-0.22	0.44	65	66	66	0.00566	0.99	AMD1_0175	70	30.6667	210	92
AMD1_0176	conserved protein of unknown function	166237	167634	1398	-2	136	126	131	-0.1	0.71	127	94	110	-0.38	0.14	91	115	103	0.24	0.29	AMD1_0176	122.667	30.3333	368	91
AMD1_0177	Transcription regulator protein	167743	168651	909	1	1267	1142	1204	-0.15	0.31	1183	954	1069	-0.3	0.0264	925	1043	984	0.15	0.29	AMD1_0177	1114.67	143.667	3344	431
AMD1_0178	protein of unknown function	168698	169066	369	-1	30	30		0.00284	1	28	23	25	-0.21	0.6	22	27	25	0.13	0.61	AMD1_0178	29	142.667	87	428
AMD1_0179	Flagellar biosynthesis protein FlgA	169063	170466	1404	-2	62	54	58	-0.15	0.67	57	50	53	-0.17	0.59	48	50	49	0.0246	0.93	AMD1_0179	53	23.3333	159	70
AMD1_0180	Allantoin permease	170612	171955	1344	-1	74	80	77	0.0879	0.8	69	55	62	-0.3	0.32	53	73	63	0.33	0.16	AMD1_0180	78.3333	66.6667	235	200
AMD1_0181	N-methylhydantoinase B	172037	174043	2007	-1	93	75	84	-0.28	0.33	87	63	75	-0.43	0.0873	61	68	64	0.11	0.66	AMD1_0181	73	27.3333	219	82
AMD1_0182	N-methylhydantoinase A	174086	176146	2061	-1	103	63	83	-0.65	0.00698	96	69	83	-0.42	0.12	67	58	62	-0.14	0.56	AMD1_0182	61.6667	108	185	324
AMD1_0183	Aliphatic amidase regulator	176536	177156	621	-2	104	111	108	0.0808	0.78	97	92	95	-0.0725	0.81	90	102	96	0.14	0.55	AMD1_0183	108.333	37.6667	325	113
AMD1_0184	Urea ABC transporter, urea binding protein	177236	178393	1158	-1	313	306	310	-0.0315	0.92	292	276	284	-0.0825	0.72	267	279	273	0.0493	0.84	AMD1_0184	296.667	50.6667	890	152
AMD1_0185	protein of unknown function	178654	178917	264	-2	46	42	44	-0.1	0.79	43	22	32	-0.8	0.0215	21	38	30	0.58	0.052	AMD1_0185	40.6667	9.33333	122	28
AMD1_0186	conserved exported protein of unknown function	179126	179710	585	2	227	228	228	0.00436	0.99	212	134	173	-0.62	0.0102	130	209	169	0.63	0.000861	AMD1_0186	223.333	27.3333	670	82
AMD1_0187	Ribulokinase	179764	181335	1572	-2	255	243	249	-0.0629	0.81	238	153	195	-0.58	0.0221	148	222	185	0.48	0.0348	AMD1_0187	236.667	41.3333	710	124
AMD1_0188	Mannitol 2-dehydrogenase	181495	182973	1479	-2	49	28	39	-0.69	0.0263	46	25	35	-0.77	0.0221	24	26	25	0.0488	0.86	AMD1_0188	27.3333	65.3333	82	196
AMD1_0189	Sorbitol dehydrogenase	183153	183929	777	-3	71	61	66	-0.18	0.55	66	38	52	-0.74	0.0088	36	56	46	0.45	0.0794	AMD1_0189	59.6667	14.6667	179	44
AMD1_0190	ATP-binding transport protein SmoK	183926	184924	999	-1	74	54	64	-0.38	0.17	69	34	52	-0.93	0.00172	33	50	41	0.41	0.12	AMD1_0190	53	26.3333	159	79
AMD1_0191	Various polyols ABC transporter, permease component 2	184946	185770	825	-1	63	43	53	-0.47	0.0946	58	23	41	-1.26	6.98e-05	22	39	31	0.6	0.0433	AMD1_0191	42	80	126	240
AMD1_0192	Various polyols ABC transporter, permease component 1	185781	186662	882	-3	41	29	35	-0.42	0.23	39	11	25	-1.64	4.47e-05	11	26	18	0.92	0.0192	AMD1_0192	28	85	84	255
AMD1_0193	Various polyols ABC transporter, periplasmic substrate-binding protein	186747	188057	1311	-3	147	107	127	-0.4	0.0805	137	50	93	-1.41	5.8e-09	48	98	73	0.94	0.000121	AMD1_0193	105	61.6667	315	185
AMD1_0194	Transcriptional regulator of mannitol utilization, DeoR family protein	188266	189216	951	-2	405	427	416	0.0721	0.78	378	504	441	0.39	0.0399	488	390	439	-0.29	0.0662	AMD1_0194	415.667	7.33333	1247	22
AMD1_0195	OsmC family protein	189340	189777	438	-2	660	726	693	0.13	0.4	617	938	777	0.59	1.02e-05	909	663	786	-0.42	0.00123	AMD1_0195	708.333	9.66667	2125	29
AMD1_0196	protein kinase YeaG	190184	192133	1950	2	2456	1808	2132	-0.41	0.0455	2292	1109	1701	-1.01	4.34e-08	1076	1652	1364	0.59	3.23e-06	AMD1_0196	1764	61	5292	183
AMD1_0197	conserved protein of unknown function	192146	193462	1317	2	1097	804	951	-0.41	0.0598	1024	446	735	-1.15	2.12e-08	433	735	584	0.71	6.31e-06	AMD1_0197	785	36	2355	108
AMD1_0198	SpoVR-like protein	193472	195040	1569	2	770	531	651	-0.46	0.096	719	290	504	-1.24	1.51e-06	281	485	383	0.72	9.48e-05	AMD1_0198	520	134	1560	402
AMD1_0199	Copper homeostasis protein CutC	195037	195768	732	-2	86	86	86	0.00748	0.99	80	75	78	-0.0868	0.79	73	79	76	0.0814	0.75	AMD1_0199	84	36.6667	252	110
AMD1_0200	N-acetyl-D-glucosamine kinase	195761	196675	915	-1	148	120	134	-0.27	0.26	138	115	127	-0.23	0.32	112	109	111	-0.0261	0.92	AMD1_0200	116.333	5.66667	349	17
AMD1_0201	Cryptic asc operon repressor	196762	197760	999	1	181	181	181	-0.00409	0.99	169	153	161	-0.13	0.59	149	165	157	0.12	0.58	AMD1_0201	176	278.333	528	835
AMD1_0202	protein of unknown function	197813	198346	534	-1	198	412	305	1	1.13e-05	185	219	202	0.21	0.49	212	376	294	0.74	0.000456	AMD1_0202	403	19.6667	1209	59
AMD1_0203	protein of unknown function	197995	198714	720	-2	233	453	343	0.9	2.98e-05	218	250	234	0.18	0.57	243	414	328	0.67	0.00164	AMD1_0203	442.667	15.3333	1328	46
AMD1_0204	N(4)-(Beta-N-acetylglucosaminyl)-L-asparaginase	198630	199553	924	-3	175	242	209	0.44	0.013	164	181	172	0.14	0.63	176	221	198	0.25	0.23	AMD1_0204	236	20.3333	708	61
AMD1_0205	L-glutamine ABC transporter ATP binding subunit	199555	200286	732	-2	114	168	141	0.52	0.00685	106	128	117	0.25	0.34	124	154	139	0.23	0.27	AMD1_0205	163.667	30.3333	491	91
AMD1_0206	Inner membrane amino-acid ABC transporter permease protein YecS	200286	200957	672	-3	51	117	84	1.13	4.89e-07	48	73	60	0.53	0.0513	71	107	89	0.51	0.0172	AMD1_0206	114.667	25.3333	344	76
AMD1_0207	Putative glutamine ABC transporter permease protein GlnM	200957	201628	672	-1	241	351	296	0.51	0.00234	225	284	254	0.27	0.39	275	320	298	0.14	0.59	AMD1_0207	342.667	168.667	1028	506
AMD1_0208	conserved exported protein of unknown function	201856	202989	1134	-2	1393	1519	1456	0.12	0.61	1301	825	1063	-0.63	0.00021	800	1388	1094	0.75	1.19e-06	AMD1_0208	1477.33	24.6667	4432	74
AMD1_0209	Putative diguanylate cyclase YcdT	203339	204124	786	-1	2860	3688	3274	0.35	0.0335	2672	2039	2356	-0.37	0.043	1977	3369	2673	0.73	9.54e-07	AMD1_0209	3587.33	35.3333	10762	106
AMD1_0210	conserved exported protein of unknown function	204281	204973	693	-1	147	152	149	0.038	0.89	137	97	117	-0.47	0.041	94	138	116	0.48	0.0222	AMD1_0210	147.667	19.6667	443	59
AMD1_0211	Transglutaminase-like domain protein	205240	206181	942	1	791	819	805	0.0459	0.86	739	346	542	-1.06	3.7e-09	336	748	542	1.11	6.02e-11	AMD1_0211	795.333	272.667	2386	818
AMD1_0212	protein of unknown function	206301	206402	102	-3	88	128	108	0.5	0.0179	82	90	86	0.12	0.7	88	117	102	0.33	0.11	AMD1_0212	125	108	375	324
AMD1_0213	Outer membrane efflux protein BepC	206487	207932	1446	3	3136	4221	3679	0.41	0.00142	2929	3106	3018	0.0809	0.66	3012	3856	3434	0.33	0.00464	AMD1_0213	4113	60.3333	12339	181
AMD1_0214	RTX-I toxin determinant B	207964	210099	2136	1	1532	2116	1824	0.44	0.00271	1431	1759	1595	0.28	0.12	1706	1933	1819	0.15	0.43	AMD1_0214	2055.33	92.3333	6166	277
AMD1_0215	Membrane fusion protein (MFP) family protein	210157	211446	1290	1	893	968	930	0.11	0.66	834	751	792	-0.14	0.47	728	884	806	0.23	0.23	AMD1_0215	939.333	33	2818	99
AMD1_0216	RHH_4 domain-containing protein	211436	212068	633	2	173	209	191	0.25	0.28	162	158	160	-0.0313	0.92	153	191	172	0.25	0.23	AMD1_0216	203.333	21	610	63
AMD1_0217	conserved exported protein of unknown function	212235	212807	573	3	1148	1038	1093	-0.14	0.52	1072	685	878	-0.62	0.000875	664	948	806	0.46	0.00645	AMD1_0217	1010.67	39.6667	3032	119
AMD1_0218	N-acetyltransferase domain-containing protein	212819	213352	534	-1	142	143	143	0.00913	0.98	133	260	197	0.94	1.16e-07	252	131	192	-0.9	5.26e-07	AMD1_0218	139.333	185	418	555
AMD1_0219	conserved protein of unknown function	213439	213666	228	-2	68	70	69	0.0321	0.93	64	67	66	0.0556	0.88	65	64	65	-0.0106	0.98	AMD1_0219	68.3333	4	205	12
AMD1_0220	Endonuclease III	213740	214552	813	-1	539	490	515	-0.13	0.44	503	533	518	0.0804	0.69	517	448	482	-0.18	0.29	AMD1_0220	477.333	23.3333	1432	70
AMD1_0221	conserved protein of unknown function	214575	215069	495	3	324	414	369	0.34	0.0234	302	281	292	-0.1	0.66	273	378	325	0.42	0.0135	AMD1_0221	403.667	37.6667	1211	113
AMD1_0222	ADA regulatory protein / Methylated-DNA--protein-cysteine methyltransferase	215132	216025	894	2	243	295	269	0.26	0.14	227	206	217	-0.13	0.57	200	270	235	0.38	0.0289	AMD1_0222	287.667	33	863	99
AMD1_0223	Ribokinase	216124	217023	900	1	456	439	447	-0.0539	0.79	426	415	420	-0.036	0.86	402	401	402	-0.00557	0.98	AMD1_0223	427.667	79.6667	1283	239
AMD1_0224	Homoserine/homoserine lactone efflux protein	217093	217707	615	1	708	868	788	0.28	0.0463	661	536	599	-0.29	0.0698	519	792	656	0.57	5.07e-05	AMD1_0224	845.667	19.3333	2537	58
AMD1_0225	Pyrimidine-specific ribonucleoside hydrolase RihA	217792	218733	942	-2	270	278	274	0.0428	0.89	252	335	294	0.38	0.11	325	254	290	-0.29	0.13	AMD1_0225	272	53	816	159
AMD1_0226	small heat shock protein IbpA	218863	219288	426	1	1562	1274	1418	-0.27	0.23	1459	1183	1321	-0.27	0.29	1147	1163	1155	0.0124	0.97	AMD1_0226	1249.33	43.6667	3748	131
AMD1_0227	Putative small protein	219351	219608	258	3	1033	966	1000	-0.0872	0.74	965	782	874	-0.28	0.0812	759	882	821	0.18	0.36	AMD1_0227	947.667	34.6667	2843	104
AMD1_0228	phosphotransferase system enzyme IIA(Ntr)	219706	220170	465	-2	3092	3244	3168	0.0666	0.64	2887	3486	3187	0.26	0.1	3382	2963	3173	-0.17	0.29	AMD1_0228	3160.33	123	9481	369
AMD1_0229	Ribosome hibernation promotion factor	220236	220793	558	-3	6666	5879	6273	-0.17	0.23	6224	6195	6210	-0.00465	0.98	6010	5370	5690	-0.14	0.38	AMD1_0229	5724.33	47.6667	17173	143
AMD1_0230	RNA polymerase sigma-54 factor	221101	222636	1536	-2	1455	1418	1436	-0.0359	0.85	1358	1524	1441	0.16	0.29	1478	1295	1386	-0.17	0.25	AMD1_0230	1379.67	70.6667	4139	212
AMD1_0231	protein of unknown function	222621	222824	204	3	-	-			-	10	13	12	0.21	0.64	13	5.65	9.18	-0.44	0.12	AMD1_0231	6	423.333	18	1270
AMD1_0232	lipopolysaccharide transport system ATP binding protein	222841	223662	822	-2	1515	1232	1373	-0.29	0.0202	1414	1725	1570	0.28	0.0672	1673	1125	1399	-0.54	8.72e-05	AMD1_0232	1199.67	65.6667	3599	197
AMD1_0233	Lipopolysaccharide transport periplasmic protein LptA	223662	224243	582	-3	1533	1224	1379	-0.32	0.00595	1432	1560	1496	0.12	0.45	1513	1118	1315	-0.41	0.00165	AMD1_0233	1193	52.3333	3579	157
AMD1_0234	Lipopolysaccharide-assembly, LptC-related	224212	224931	720	-2	1460	1064	1262	-0.44	0.00204	1363	1401	1382	0.0363	0.85	1359	972	1166	-0.45	0.000956	AMD1_0234	1035.33	33.3333	3106	100
AMD1_0235	macromolecule metabolism; macromolecule degradation; degradation of proteins, peptides, glycopeptides	225198	226172	975	3	1838	2638	2238	0.51	6.89e-07	1716	2693	2205	0.63	7.78e-07	2612	2410	2511	-0.1	0.49	AMD1_0235	2573.33	50	7720	150
AMD1_0236	integration host factor subunit beta	226215	226499	285	3	1310	1388	1349	0.0801	0.64	1223	1144	1183	-0.093	0.6	1109	1268	1188	0.17	0.2	AMD1_0236	1352.67	30.3333	4058	91
AMD1_0237	conserved protein of unknown function	226541	226870	330	2	443	470	456	0.0805	0.71	413	454	433	0.13	0.52	440	429	434	-0.031	0.88	AMD1_0237	458	19	1374	57
AMD1_0238	Delta(1)-pyrroline-2-carboxylate reductase	226910	227875	966	2	917	985	951	0.0972	0.64	856	903	880	0.0733	0.73	876	899	888	0.0329	0.86	AMD1_0238	960	74	2880	222
AMD1_0239	SAM dependent methyltransferase	228035	229126	1092	2	869	844	856	-0.0401	0.85	811	1151	981	0.49	0.000694	1116	771	944	-0.49	0.000759	AMD1_0239	821.667	13.3333	2465	40
AMD1_0240	macromolecule metabolism; macromolecule synthesis, modification; rna synthesis, modification , dna transcription	229123	229959	837	1	635	694	664	0.12	0.44	593	950	771	0.66	6.83e-07	922	634	778	-0.51	0.000245	AMD1_0240	676.667	22	2030	66
AMD1_0241	Lipoprotein signal peptidase	229969	230460	492	1	296	409	352	0.45	0.00272	276	490	383	0.8	2.04e-07	475	374	424	-0.31	0.0465	AMD1_0241	398.333	128.667	1195	386
AMD1_0242	Bacterial SH3 domain protein	230768	231514	747	2	3592	1757	2675	-1.01	2.21e-15	3353	2189	2771	-0.59	0.000236	2123	1605	1864	-0.37	0.0131	AMD1_0242	1711	91	5133	273
AMD1_0243	Histidine kinase	231606	233894	2289	3	1901	2319	2110	0.27	0.0751	1776	1035	1405	-0.74	7.95e-05	1004	2118	1561	1.03	2.82e-09	AMD1_0243	2258.67	76.6667	6776	230
AMD1_0244	putative L-ornithine N(alpha)-acyltransferase	234045	234926	882	3	1801	1688	1744	-0.0889	0.65	1681	1737	1709	0.0446	0.83	1685	1542	1613	-0.11	0.46	AMD1_0244	1646	41.3333	4938	124
AMD1_0245	conserved protein of unknown function	234931	235284	354	1	374	332	353	-0.16	0.44	349	392	371	0.16	0.41	381	303	342	-0.29	0.0779	AMD1_0245	323	20.6667	969	62
AMD1_0246	conserved protein of unknown function	235311	235778	468	3	211	156	184	-0.41	0.0398	197	164	181	-0.25	0.27	159	142	150	-0.13	0.54	AMD1_0246	151.667	47	455	141
AMD1_0247	NADH dehydrogenase	235833	237134	1302	-3	492	551	521	0.16	0.37	459	555	507	0.26	0.12	538	503	520	-0.0847	0.62	AMD1_0247	536.667	46.3333	1610	139
AMD1_0248	Putative membrane protein	237202	237834	633	-2	530	584	557	0.13	0.42	495	699	597	0.48	0.00062	678	533	605	-0.32	0.0223	AMD1_0248	568.667	16.6667	1706	50
AMD1_0249	Protein GrpE	237956	238588	633	-1	3054	2515	2784	-0.27	0.0871	2851	3970	3410	0.46	0.00186	3850	2297	3074	-0.72	1.18e-08	AMD1_0249	2453.33	20.3333	7360	61
AMD1_0250	conserved protein of unknown function	238846	239046	201	1	603	438	521	-0.44	0.00272	563	229	396	-1.26	3.23e-11	222	400	311	0.79	1.47e-05	AMD1_0250	427.667	1509.33	1283	4528
AMD1_0251	Oxidoreductase probably involved in sulfite reduction	239049	239588	540	-3	2787	3908	3347	0.46	0.00759	2602	4902	3752	0.89	6.7e-09	4754	3569	4162	-0.36	0.0278	AMD1_0251	3798.33	106.667	11395	320
AMD1_0252	Phosphoadenosine phosphosulfate reductase	239599	240357	759	-2	3733	5770	4752	0.61	3.06e-07	3485	6593	5039	0.9	1.38e-09	6396	5271	5833	-0.25	0.0794	AMD1_0252	5623.33	109	16870	327
AMD1_0253	Sulfite reductase (NADPH) hemoprotein beta-component	240332	242002	1671	-1	6291	9656	7974	0.6	2.42e-07	5873	12100	8994	1.01	1.46e-08	11800	8819	10300	-0.36	0.0343	AMD1_0253	9418.67	196.333	28256	589
AMD1_0254	conserved protein of unknown function	242019	242324	306	-3	1631	2094	1862	0.34	0.0758	1522	3295	2409	1.09	2.06e-11	3196	1913	2555	-0.69	8.54e-05	AMD1_0254	2032.33	25.3333	6097	76
AMD1_0255	Uroporphyrinogen-III C-methyltransferase / Precorrin-2 dehydrogenase / Sirohydrochlorin ferrochelatase	242321	243772	1452	-1	4863	7974	6418	0.69	1.93e-08	4540	11300	7944	1.3	2.95e-15	11000	7284	9147	-0.55	0.000861	AMD1_0255	7757.67	95	23273	285
AMD1_0256	protein of unknown function	243769	243996	228	-2	990	2038	1514	1.03	4.35e-26	924	2906	1915	1.63	2.42e-23	2819	1861	2340	-0.55	0.000815	AMD1_0256	1986	15.6667	5958	47
AMD1_0257	conserved protein of unknown function	244215	244664	450	3	103	44	74	-1.14	6.67e-05	96	56	76	-0.69	0.0225	54	40	47	-0.28	0.26	AMD1_0257	43	22	129	66
AMD1_0258	putative transporter YbaL	244859	246661	1803	2	1054	1313	1184	0.3	0.0954	984	1327	1156	0.41	0.00855	1287	1199	1243	-0.0853	0.66	AMD1_0258	1284.33	51.3333	3853	154
AMD1_0259	conserved protein of unknown function	246719	247060	342	-1	19	18	19	-0.0694	0.88	18	29	24	0.52	0.2	28	16	22	-0.42	0.14	AMD1_0259	17.6667	115.667	53	347
AMD1_0260	Transcriptional regulator SlyA	247151	247669	519	-1	106	103	104	-0.0362	0.92	99	128	113	0.32	0.3	125	94	109	-0.3	0.2	AMD1_0260	100.333	23.3333	301	70
AMD1_0261	conserved exported protein of unknown function	247903	248757	855	-2	412	404	408	-0.0261	0.92	385	277	331	-0.44	0.0272	269	369	319	0.4	0.0189	AMD1_0261	394	19.6667	1182	59
AMD1_0262	Multimodular transpeptidase-transglycosylase	248946	251141	2196	-3	3453	2312	2883	-0.56	2.59e-05	3224	3285	3255	0.0243	0.9	3186	2112	2649	-0.56	8.98e-05	AMD1_0262	2248	44	6744	132
AMD1_0263	conserved protein of unknown function	251306	251539	234	-1	22	20	21	-0.0984	0.83	21	21	21	0.0266	0.96	20	18	19	-0.071	0.79	AMD1_0263	19.3333	20.3333	58	61
AMD1_0264	conserved protein of unknown function	251810	252010	201	-1	247	190	219	-0.36	0.0418	231	181	206	-0.33	0.1	176	174	175	-0.00882	0.98	AMD1_0264	185.333	8	556	24
AMD1_0265	conserved protein of unknown function	252047	252295	249	-1	394	384	389	-0.0354	0.89	368	305	336	-0.25	0.24	295	351	323	0.2	0.29	AMD1_0265	375	8.33333	1125	25
AMD1_0266	protein of unknown function	252207	252419	213	-3	196	198	197	0.0139	0.97	183	151	167	-0.25	0.29	147	181	164	0.23	0.27	AMD1_0266	193.667	14.6667	581	44
AMD1_0267	conserved protein of unknown function	252367	252666	300	-2	401	359	380	-0.15	0.43	374	484	429	0.35	0.0907	469	328	398	-0.45	0.0134	AMD1_0267	350	18	1050	54
AMD1_0268	Ribonuclease D related protein	252749	253366	618	-1	1130	1192	1161	0.0723	0.73	1056	1491	1273	0.48	0.00032	1446	1089	1267	-0.37	0.0103	AMD1_0268	1164.33	67.6667	3493	203
AMD1_0269	Succinyl-diaminopimelate desuccinylase	253444	254832	1389	-2	1627	1582	1604	-0.0387	0.86	1519	2208	1864	0.51	0.0042	2140	1444	1792	-0.51	0.00419	AMD1_0269	1547.33	80.3333	4642	241
AMD1_0270	DNA polymerase I	255610	258588	2979	1	1904	2010	1957	0.0762	0.6	1778	1963	1871	0.14	0.34	1904	1836	1870	-0.0477	0.77	AMD1_0270	1960.67	118.333	5882	355
AMD1_0271	Homoserine/homoserine lactone efflux protein	258590	259219	630	2	161	171	166	0.0731	0.79	151	183	167	0.25	0.25	177	156	167	-0.14	0.49	AMD1_0271	166.667	86	500	258
AMD1_0272	Zinc uptake regulation protein ZUR	259216	259677	462	-2	743	660	701	-0.16	0.33	693	618	655	-0.16	0.44	599	603	601	0.00657	0.98	AMD1_0272	642.333	42.6667	1927	128
AMD1_0273	L-glyceraldehyde 3-phosphate reductase	259956	261008	1053	-3	660	639	650	-0.0421	0.83	616	717	666	0.21	0.22	695	584	640	-0.22	0.16	AMD1_0273	623.667	16.6667	1871	50
AMD1_0274	L-arabinose 1-dehydrogenase	261212	262354	1143	-1	61	51	56	-0.23	0.49	57	37	47	-0.54	0.0883	36	47	41	0.23	0.37	AMD1_0274	49.6667	12.3333	149	37
AMD1_0275	Xylose isomerase-like TIM barrel	262365	263111	747	-3	142	111	126	-0.32	0.16	133	164	148	0.28	0.19	159	101	130	-0.57	0.00488	AMD1_0275	107.667	16.3333	323	49
AMD1_0276	protein of unknown function	263041	263229	189	-2																AMD1_0276	5.33333	5.33333	16	16
AMD1_0277	Raffinose operon repressor	263603	264664	1062	2	731	1166	949	0.65	2.4e-06	683	1369	1026	0.98	3.93e-10	1328	1065	1196	-0.28	0.0901	AMD1_0277	1139	272.333	3417	817
AMD1_0278	6-phosphogluconate dehydrogenase, NADP(+)-dependent, decarboxylating	264661	266079	1419	-2	1342	1307	1324	-0.0372	0.84	1253	1221	1237	-0.0353	0.86	1184	1194	1189	0.00944	0.97	AMD1_0278	1274.33	138	3823	414
AMD1_0279	Ferric uptake regulation protein	266215	AMD1_0276	protein of unknown function	263041	263229	189	-2	-0.00487	0.99	388	391	390	0.00764	0.97						AMD1_0279	404.333	13.3333	1213	40
AMD1_0280	HTH-type transcriptional regulator AglR	266760	267779	1020	-3	795	140	467	-2.47	7.87e-33	742	93	418	-2.97	1.16e-39	90	128	109	0.43	0.0366	AMD1_0280	136.667	23.3333	410	70
AMD1_0281	protein of unknown function	267776	268054	279	-1	261	42	151	-2.6	9.89e-31	243	27	135	-3.08	6.52e-25	26	38	32	0.25	0.34	AMD1_0281	41	30.3333	123	91
AMD1_0282	Alpha-glucosides-binding periplasmic protein AglE	268135	269490	1356	1	10100	1181	5625	-3.07	4.5e-63	9405	598	5001	-3.97	1.03e-134	579	1079	829	0.84	3.27e-06	AMD1_0282	1156.33	49	3469	147
AMD1_0283	Alpha-glucoside transport system permease protein AglF	269611	270627	1017	1	2606	213	1409	-3.59	6.72e-75	2434	104	1269	-4.55	1.42e-154	101	195	148	0.86	0.000343	AMD1_0283	209	42	627	126
AMD1_0284	Alpha-glucoside transport system permease protein AglG	270629	271783	1155	2	2579	227	1403	-3.48	3.4e-60	2409	107	1258	-4.47	2.29e-146	104	207	155	0.88	0.000668	AMD1_0284	222.333	56.6667	667	170
AMD1_0285	putative alpha-glucosidase	271788	273452	1665	3	5101	412	2756	-3.62	2.7e-106	4764	196	2480	-4.59	8.52e-175	190	376	283	0.91	2.01e-05	AMD1_0285	403	67	1209	201
AMD1_0286	maltose ABC transporter ATP binding subunit	273483	274595	1113	3	3344	345	1845	-3.26	1.58e-106	3123	156	1640	-4.3	8.27e-137	151	315	233	0.98	3.95e-06	AMD1_0286	337.333	124.333	1012	373
AMD1_0287	Chelated iron transport system membrane protein YfeD	274634	275479	846	-1	335	510	423	0.58	0.000326	313	353	333	0.16	0.55	342	466	404	0.37	0.0516	AMD1_0287	498.667	159.667	1496	479
AMD1_0288	Chelated iron transport system membrane protein YfeC	275476	276336	861	-2	259	351	305	0.41	0.0185	241	224	233	-0.0952	0.71	217	321	269	0.48	0.0104	AMD1_0288	343	16	1029	48
AMD1_0289	Chelated iron transport system membrane protein YfeB	276333	277247	915	-3	298	374	336	0.3	0.0955	278	265	271	-0.0645	0.8	257	341	299	0.35	0.0504	AMD1_0289	364.667	8.66667	1094	26
AMD1_0290	Periplasmic chelated iron-binding protein YfeA	277244	278152	909	-1	415	498	457	0.24	0.29	387	382	385	-0.0138	0.97	371	455	413	0.22	0.29	AMD1_0290	486.333	18	1459	54
AMD1_0291	conserved protein of unknown function	278350	278601	252	1	96	49	73	-0.87	0.00349	90	49	69	-0.75	0.0189	47	45	46	-0.0475	0.87	AMD1_0291	48	13.6667	144	41
AMD1_0292	conserved protein of unknown function	278641	279399	759	-2	247	223	235	-0.13	0.57	231	150	191	-0.58	0.00408	146	204	175	0.41	0.0416	AMD1_0292	217	72.3333	651	217
AMD1_0293	Minor extracellular protease epr	279600	281105	1506	-3	554	542	548	-0.0288	0.9	517	322	419	-0.65	0.000521	312	495	403	0.6	0.00153	AMD1_0293	527.333	19.3333	1582	58
AMD1_0294	Putative anti-sigmaE protein	281102	281764	663	-1	397	444	421	0.15	0.43	371	247	309	-0.56	0.0031	240	406	323	0.71	9.45e-05	AMD1_0294	432.667	7.66667	1298	23
AMD1_0295	RNA polymerase subunit sigma	281761	282333	573	-2	768	731	749	-0.0683	0.72	717	563	640	-0.33	0.0825	546	667	607	0.24	0.18	AMD1_0295	710.667	15	2132	45
AMD1_0296	Stage 0 sporulation protein KE	282693	283448	756	-3	96	108	102	0.14	0.64	90	61	75	-0.49	0.0623	59	99	79	0.61	0.0104	AMD1_0296	105.667	13.3333	317	40
AMD1_0297	Oligopeptide transport ATP-binding protein OppD	283445	284434	990	-1	162	171	167	0.0698	0.81	151	102	127	-0.53	0.0119	99	156	128	0.57	0.00647	AMD1_0297	167	36.3333	501	109
AMD1_0298	Putative D,D-dipeptide transport system permease protein DdpC	284434	285273	840	-2	111	119	115	0.0902	0.79	103	66	85	-0.57	0.0292	64	109	87	0.65	0.00483	AMD1_0298	116.667	84.3333	350	253
AMD1_0299	Glutathione transport system permease protein GsiC	285273	286238	966	-3	136	163	150	0.22	0.51	127	95	111	-0.36	0.22	92	149	120	0.61	0.00296	AMD1_0299	159.667	82.3333	479	247
AMD1_0300	Putative D,D-dipeptide-binding periplasmic protein DdpA	286293	287738	1446	-3	475	467	471	-0.0199	0.96	444	357	400	-0.28	0.22	347	426	386	0.25	0.15	AMD1_0300	456.667	59.6667	1370	179
AMD1_0301	Cocaine esterase	287849	289873	2025	-1	825	816	820	-0.0134	0.97	771	584	677	-0.37	0.0839	566	745	655	0.34	0.0671	AMD1_0301	798.667	233.667	2396	701
AMD1_0302	HTH-type transcriptional regulator BetI	289950	290540	591	3	278	293	286	0.0716	0.74	260	230	245	-0.17	0.41	223	268	245	0.23	0.18	AMD1_0302	286	29	858	87
AMD1_0303	IMPACT family member in pol 5'region	291074	291661	588	2	93	113	103	0.25	0.37	87	115	101	0.37	0.12	111	103	107	-0.0799	0.74	AMD1_0303	109.667	5.33333	329	16
AMD1_0304	Cupin domain protein	291842	292243	402	2	128	155	141	0.25	0.34	119	111	115	-0.0935	0.75	107	142	125	0.32	0.13	AMD1_0304	151	100.667	453	302
AMD1_0305	D-alanyl-D-alanine carboxypeptidase DacA	292300	293370	1071	-2	672	844	758	0.31	0.0536	627	636	632	0.0191	0.93	617	771	694	0.28	0.068	AMD1_0305	822.667	66.3333	2468	199
AMD1_0306	conserved protein of unknown function	293448	294674	1227	3	374	399	386	0.088	0.66	349	322	335	-0.11	0.6	312	364	338	0.19	0.27	AMD1_0306	388.333	106.333	1165	319
AMD1_0307	Fructokinase FrcK	294747	295355	609	3	897	639	768	-0.47	0.00172	838	724	781	-0.2	0.2	702	584	643	-0.23	0.16	AMD1_0307	625	15	1875	45
AMD1_0308	Polyhydroxyalkanoic acid synthase	295427	295768	342	2	391	263	327	-0.55	0.000164	365	303	334	-0.25	0.21	294	241	267	-0.23	0.22	AMD1_0308	257	256	771	768
AMD1_0309	Disulfide-bond oxidoreductase YfcG	295798	296502	705	-2	876	956	916	0.12	0.64	818	899	858	0.13	0.55						AMD1_0309	937.667	246	2813	738
AMD1_0310	Nodulation protein E	296660	297871	1212	-1	1645	1847	1746	0.16	0.4	1536	1462	1499	-0.0674	0.75	1418	1687	1553	0.22	0.14	AMD1_0310	1800.33	137	5401	411
AMD1_0311	Nodulation protein F	297873	298127	255	-3	822	795	808	-0.045	0.83	767	639	703	-0.25	0.11	620	726	673	0.2	0.22	AMD1_0311	773.333	32.3333	2320	97
AMD1_0312	Urease accessory protein UreD	298323	299177	855	3	642	635	639	-0.0157	0.94	600	733	667	0.27	0.11	711	580	646	-0.25	0.12	AMD1_0312	619.333	16.3333	1858	49
AMD1_0313	Urease subunit gamma	299193	299495	303	3	170	152	161	-0.14	0.54	158	173	166	0.12	0.61	168	139	153	-0.22	0.25	AMD1_0313	148.333	13.6667	445	41
AMD1_0314	conserved protein of unknown function	299503	299757	255	1	107	95	101	-0.14	0.67	100	105	102	0.0635	0.85	102	87	94	-0.14	0.57	AMD1_0314	93.3333	17.3333	280	52
AMD1_0315	Urease subunit beta	299769	300074	306	3	223	182	202	-0.27	0.18	208	219	214	0.0753	0.77	213	166	189	-0.3	0.12	AMD1_0315	177.667	113.667	533	341
AMD1_0316	Urease subunit alpha 1	300074	301786	1713	2	988	907	947	-0.12	0.51	922	1018	970	0.14	0.51	987	828	908	-0.22	0.21	AMD1_0316	885.333	237.333	2656	712
AMD1_0317	Peroxiredoxin	301923	302480	558	3	2303	4461	3382	0.92	1.54e-07	2150	14300	8224	2.71	1.9e-43	13900	4073	8970	-1.73	1.39e-20	AMD1_0317	4355.33	53.3333	13066	160
AMD1_0318	conserved protein of unknown function	302639	303094	456	2	537	667	602	0.3	0.0266	502	676	589	0.42	0.00305	656	609	633	-0.0927	0.58	AMD1_0318	649.667	13	1949	39
AMD1_0319	Urease accessory protein UreE	303281	303832	552	2	120	188	154	0.58	0.00705	112	253	183	1.13	1.3e-08	246	171	209	-0.45	0.0153	AMD1_0319	183	14.6667	549	44
AMD1_0320	Urease accessory protein UreF	303783	304496	714	3	100	124	112	0.27	0.24	94	205	149	1.09	8.6e-09	199	113	156	-0.75	4.29e-05	AMD1_0320	120.667	12	362	36
AMD1_0321	conserved membrane protein of unknown function	304493	304933	441	2	47	70	58	0.48	0.0888	44	109	77	1.24	4.26e-07	106	64	85	-0.64	0.00375	AMD1_0321	67.6667	8.66667	203	26
AMD1_0322	Urease accessory protein UreG	304930	305565	636	1	162	198	180	0.26	0.24	151	319	235	1.04	3.26e-08	310	181	245	-0.73	1.41e-05	AMD1_0322	193	25.6667	579	77
AMD1_0323	Aldolase II superfamily protein	305630	306388	759	2	147	197	172	0.39	0.0756	137	254	196	0.86	2.06e-06	247	180	213	-0.38	0.0491	AMD1_0323	192.333	123	577	369
AMD1_0324	Phosphorylated carbohydrates phosphatase	306390	307025	636	-3	508	554	531	0.12	0.56	474	536	505	0.16	0.38	519	506	513	-0.0332	0.86	AMD1_0324	539.667	39	1619	117
AMD1_0325	conserved protein of unknown function	307125	307304	180	-3	-	-			-	12	10	11	-0.0893	0.86	9.92	9.57	9.75	-0.0148	0.96	AMD1_0325	10.3333	5.33333	31	16
AMD1_0326	Gcv operon activator	307437	308330	894	3	119	124	121	0.0493	0.87	111	104	108	-0.0786	0.79	101	113	107	0.11	0.62	AMD1_0326	120.667	21	362	63
AMD1_0327	putative multidrug resistance protein NorM	308516	309919	1404	2	150	192	171	0.32	0.13	140	230	185	0.68	0.000621	223	175	199	-0.29	0.13	AMD1_0327	186.333	33.6667	559	101
AMD1_0328	Putative ABC transporter permease	309956	310756	801	-1	366	287	326	-0.33	0.1	342	226	284	-0.57	0.00193	219	262	241	0.2	0.35	AMD1_0328	278	57.6667	834	173
AMD1_0329	Spermidine/putrescine transport system permease protein PotB	310753	311607	855	-2	178	152	165	-0.2	0.45	167	50	108	-1.7	1.29e-13	48	139	94	1.46	5.71e-09	AMD1_0329	149.333	32.3333	448	97
AMD1_0330	Spermidine/putrescine import ATP-binding protein PotA	311604	312860	1257	-3	373	339	356	-0.13	0.58	349	148	248	-1.2	8.4e-11	144	310	227	1.07	2.58e-09	AMD1_0330	330	23.3333	990	70
AMD1_0331	ABC transporter, periplasmic spermidine putrescine-binding protein potD (TC_3.A.1.11.1)	312836	313924	1089	-1	597	577	587	-0.0444	0.86	557	207	382	-1.4	3.64e-13	201	527	364	1.36	3.16e-17	AMD1_0331	562.667	66	1688	198
AMD1_0332	amino acid ABC transporter, permease protein	314004	314651	648	-3	169	171	170	0.0224	0.94	158	91	124	-0.74	0.001	88	157	122	0.75	0.000263	AMD1_0332	167	137	501	411
AMD1_0333	Inner membrane amino-acid ABC transporter permease protein YecS	314648	315316	669	-1	252	308	280	0.27	0.21	236	164	200	-0.49	0.0161	159	282	221	0.77	2.94e-05	AMD1_0333	301.333	49.3333	904	148
AMD1_0334	Sulfate starvation-induced protein 7	315320	316123	804	-1	661	581	621	-0.17	0.37	618	410	514	-0.57	0.00052	397	530	464	0.37	0.017	AMD1_0334	566	69.3333	1698	208
AMD1_0335	Guanidinopropionase	316217	317278	1062	-1	231	210	220	-0.12	0.63	215	110	162	-0.93	6.84e-06	106	192	149	0.79	5.53e-05	AMD1_0335	204.667	38.3333	614	115
AMD1_0336	Gcv operon activator	317487	318449	963	3	54	84	69	0.57	0.0357	50	59	55	0.19	0.57	57	77	67	0.31	0.19	AMD1_0336	82.6667	16.6667	248	50
AMD1_0337	Nicotinate phosphoribosyltransferase	318619	319923	1305	1	792	813	802	0.0359	0.86	739	585	662	-0.32	0.0966	567	742	655	0.33	0.0563	AMD1_0337	793	33.3333	2379	100
AMD1_0338	conserved membrane protein of unknown function	320353	321774	1422	1	225	209	217	-0.0942	0.71	210	173	192	-0.26	0.24	168	191	179	0.15	0.46	AMD1_0338	203.667	92.3333	611	277
AMD1_0339	Aliphatic amidase expression-regulating protein	321940	323244	1305	1	1499	1498		-0.000156	1	1400	879	1139	-0.65	4.34e-06	852	1368	1110	0.65	8.27e-07	AMD1_0339	1462.33	55.3333	4387	166
AMD1_0340	LIV-I protein H	323397	324278	882	3	274	267	270	-0.0272	0.93	256	146	201	-0.76	0.000301	142	244	193	0.72	0.000221	AMD1_0340	261.667	29.6667	785	89
AMD1_0341	Leucine/isoleucine/valine transporter permease subunit	324275	325240	966	2	277	253	265	-0.12	0.57	259	133	196	-0.92	3.45e-07	129	231	180	0.78	2.23e-05	AMD1_0341	247	35	741	105
AMD1_0342	branched chain amino acid/phenylalanine ABC transporter ATP binding subunit LivG	325237	325974	738	1	303	225	264	-0.4	0.0166	283	139	211	-0.99	5.52e-08	134	206	170	0.54	0.00387	AMD1_0342	219.667	46.3333	659	139
AMD1_0343	branched chain amino acid/phenylalanine ABC transporter ATP binding subunit LivF	325971	326678	708	3	314	230	272	-0.41	0.0318	294	146	220	-0.97	5.58e-07	141	211	176	0.51	0.00449	AMD1_0343	224.333	60.6667	673	182
AMD1_0344	conserved membrane protein of unknown function	326818	328245	1428	-2	689	876	783	0.32	0.098	644	696	670	0.1	0.61	675	800	738	0.21	0.27	AMD1_0344	856	92	2568	276
AMD1_0345	Nicotinamidase	328302	328901	600	-3	387	441	414	0.18	0.42	361	360	360	-0.00654	0.98	349	403	376	0.17	0.35	AMD1_0345	431.667	17.6667	1295	53
AMD1_0346	Nicotinate dehydrogenase FAD-subunit	329113	329970	858	1	810	734	772	-0.14	0.41	756	349	552	-1.09	1.65e-09	338	671	504	0.94	2.82e-07	AMD1_0346	714.667	7	2144	21
AMD1_0347	putative hypoxanthine oxidase XdhD	329967	332846	2880	3	597	463	530	-0.35	0.0556	557	203	380	-1.44	1.59e-15	196	422	309	1.05	7.25e-08	AMD1_0347	451.667	37.3333	1355	112
AMD1_0348	6-hydroxynicotinate reductase	332843	334378	1536	2	378	252	315	-0.56	0.000257	353	103	228	-1.74	1.78e-21	100	230	165	1.14	6.1e-09	AMD1_0348	246	34	738	102
AMD1_0349	conserved protein of unknown function	334375	335244	870	1	150	98	124	-0.56	0.0128	140	47	94	-1.53	1.28e-10	46	89	68	0.85	0.00133	AMD1_0349	95.6667	4	287	12
AMD1_0350	conserved protein of unknown function	335237	335821	585	2	418	238	328	-0.78	7.5e-06	390	139	265	-1.46	1.18e-18	135	217	176	0.61	0.00211	AMD1_0350	231.667	22	695	66
AMD1_0351	Nicotinate degradation protein R	335818	336246	429	1	351	284	317	-0.29	0.0897	328	161	244	-1	3.16e-09	156	259	207	0.68	9.91e-05	AMD1_0351	276	183	828	549
AMD1_0352	Aldehyde dehydrogenase AldA	336326	338695	2370	-1	795	889	842	0.16	0.32	742	853	797	0.19	0.2	827	812	820	-0.0229	0.91	AMD1_0352	866	58.3333	2598	175
AMD1_0353	Deoxyribose-phosphate aldolase	338860	339906	1047	-2	789	904	846	0.19	0.16	736	873	805	0.24	0.11	847	825	836	-0.0336	0.85	AMD1_0353	880.667	84	2642	252
AMD1_0354	Flavodoxin/ferredoxin--NADP reductase	340128	340955	828	-3	4364	6847	5606	0.64	6.16e-11	4075	8297	6186	1	4e-11	8048	6253	7151	-0.33	0.034	AMD1_0354	6677.67	98.3333	20033	295
AMD1_0355	N-methylhydantoinase A	341142	343211	2070	3	2516	2640	2578	0.0634	0.8	2350	2149	2249	-0.12	0.5	2084	2411	2247	0.18	0.28	AMD1_0355	2569.67	55.3333	7709	166
AMD1_0356	N-methylhydantoinase B	343393	345126	1734	1	288	249	269	-0.2	0.36	269	164	216	-0.68	0.000195	159	227	193	0.44	0.0191	AMD1_0356	242.333	30	727	90
AMD1_0357	maltose ABC transporter ATP binding subunit	345317	346315	999	-1	395	380	388	-0.0521	0.84	369	253	311	-0.51	0.00869	245	347	296	0.45	0.00683	AMD1_0357	370	42.6667	1110	128
AMD1_0358	Inositol 2-dehydrogenase	346331	347395	1065	-1	280	280	280	0.00519	0.99	261	194	227	-0.4	0.0465	188	256	222	0.39	0.0312	AMD1_0358	273.667	79	821	237
AMD1_0359	N-Acetyl-D-glucosamine ABC transport system, permease protein 2	347392	348231	840	-2	139	153	146	0.12	0.69	130	105	118	-0.27	0.29	102	139	121	0.35	0.12	AMD1_0359	149.667	49.6667	449	149
AMD1_0360	Lactose transport system permease protein LacF	348239	349180	942	-1	188	240	214	0.33	0.0692	176	134	155	-0.34	0.2	130	219	175	0.65	0.00482	AMD1_0360	234.667	59	704	177
AMD1_0361	N-Acetyl-D-glucosamine ABC transport system, sugar-binding protein	349398	350657	1260	-3	2263	2025	2144	-0.14	0.57	2114	949	1531	-1.11	1.15e-07	920	1849	1384	0.95	5.93e-07	AMD1_0361	1981.33	59	5944	177
AMD1_0362	N-acetylmuramic acid 6-phosphate etherase	350691	351605	915	-3	1015	750	883	-0.41	0.0088	948	643	796	-0.53	0.00204	624	685	654	0.11	0.58	AMD1_0362	729.333	26.6667	2188	80
AMD1_0363	protein of unknown function	351574	351753	180	-2	339	252	296	-0.39	0.0972	317	294	305	-0.1	0.66	285	230	257	-0.23	0.27	AMD1_0363	244	6.66667	732	20
AMD1_0364	N-acetylglucosamine kinase of eukaryotic type	351803	352684	882	2	261	195	228	-0.4	0.0249	244	236	240	-0.0486	0.86	229	178	204	-0.3	0.0946	AMD1_0364	190	12.3333	570	37
AMD1_0365	Predicted transcriptional regulator of N-Acetylglucosamine utilization, GntR family	352677	353465	789	3	239	220	230	-0.11	0.61	224	186	205	-0.25	0.21	180	201	190	0.13	0.52	AMD1_0365	214	30.3333	642	91
AMD1_0366	Glucosamine-6-phosphate deaminase (isomerizing), alternative	353462	354490	1029	2	185	211	198	0.18	0.43	172	164	168	-0.0666	0.83	159	193	176	0.21	0.32	AMD1_0366	206.333	21.3333	619	64
AMD1_0367	N-acetylglucosamine-6-phosphate deacetylase	354487	355644	1158	1	557	592	575	0.0824	0.7	521	460	490	-0.16	0.47	446	540	493	0.23	0.2	AMD1_0367	576.667	38.3333	1730	115
AMD1_0368	ribulose-phosphate 3-epimerase	356014	356688	675	-2	1042	1106	1074	0.08	0.7	974	1267	1120	0.36	0.027	1229	1010	1119	-0.26	0.0688	AMD1_0368	1079.33	42.3333	3238	127
AMD1_0369	Paralytic/GBP/PSP peptide	356845	360117	3273	-2	992	902	947	-0.13	0.64	927	334	631	-1.44	1.49e-14	324	824	574	1.32	3.66e-17	AMD1_0369	882.667	487	2648	1461
AMD1_0370	conserved protein of unknown function	360129	362114	1986	-3	834	741	787	-0.16	0.48	779	298	539	-1.36	1.52e-14	289	677	483	1.2	4.18e-14	AMD1_0370	724.333	46.3333	2173	139
AMD1_0371	D-ribose-binding periplasmic protein	362563	363588	1026	1	1107	1665	1386	0.53	0.0189	1034	838	936	-0.26	0.36	812	1521	1166	0.84	2.32e-05	AMD1_0371	1625.67	36.3333	4877	109
AMD1_0372	Ribose import ATP-binding protein RbsA	363669	365168	1500	3	239	280	260	0.21	0.36	224	195	209	-0.18	0.43	189	256	223	0.38	0.033	AMD1_0372	274	49.3333	822	148
AMD1_0373	Ribose transport system permease protein RbsC	365168	366157	990	2	89	117	103	0.36	0.11	83	79	81	-0.056	0.86	77	107	92	0.39	0.0638	AMD1_0373	114.333	13.3333	343	40
AMD1_0374	Ribose transport system permease protein RbsC	366154	367149	996	1	123	141	132	0.17	0.54	114	103	109	-0.14	0.65	99	128	114	0.29	0.16	AMD1_0374	137	6.66667	411	20
AMD1_0375	HTH-type transcriptional repressor CytR	367146	368159	1014	3	111	122	116	0.12	0.68	103	89	96	-0.2	0.49	86	111	98	0.28	0.21	AMD1_0375	118.667	36	356	108
AMD1_0376	1,5-anhydro-D-fructose reductase	368190	369434	1245	3	522	525	524	0.00837	0.98	488	471	479	-0.0449	0.85	457	480	468	0.0576	0.77	AMD1_0376	511.667	39	1535	117
AMD1_0377	Putative sugar kinase YdjH	369500	370405	906	2	272	258	265	-0.0712	0.77	254	270	262	0.0812	0.75	262	235	249	-0.12	0.55	AMD1_0377	250.667	12.3333	752	37
AMD1_0378	Putative integral membrane protein	370602	371471	870	3	599	577	588	-0.0483	0.88	559	360	459	-0.6	0.00466	349	527	438	0.54	0.00171	AMD1_0378	563.333	44.3333	1690	133
AMD1_0379	RNA polymerase sigma factor	371534	372802	1269	-1	133	143	138	0.0901	0.75	124	112	118	-0.14	0.63	108	130	119	0.2	0.35	AMD1_0379	139	104.667	417	314
AMD1_0380	RNA polymerase sigma-70 factor, ECF subfamily	372799	373173	375	-2	78	81	79	0.0625	0.85	72	62	67	-0.19	0.55	60	74	67	0.21	0.39	AMD1_0380	79.3333	9.66667	238	29
AMD1_0381	4-aminobutyrate aminotransferase PuuE	373310	374635	1326	2	381	354	368	-0.098	0.67	356	194	275	-0.85	5.01e-06	188	324	256	0.72	0.000201	AMD1_0381	345.333	42.3333	1036	127
AMD1_0382	Rhodocoxin reductase	374855	376087	1233	-1	578	669	623	0.2	0.25	540	845	693	0.63	5.96e-06	820	611	715	-0.39	0.00957	AMD1_0382	654	34.3333	1962	103
AMD1_0383	Iron-regulated protein A precursor	376703	378007	1305	2	491	471	481	-0.0545	0.86	459	724	592	0.61	0.00359	702	431	566	-0.65	0.000349	AMD1_0383	461.333	63.3333	1384	190
AMD1_0384	BFD-like [2Fe-2S] binding domain protein	378082	378393	312	1	1676	1605	1641	-0.0603	0.75	1566	1225	1396	-0.33	0.1	1189	1466	1327	0.25	0.18	AMD1_0384	1567.67	53	4703	159
AMD1_0385	Bacterioferritin	378359	378844	486	2	5236	5003	5119	-0.0625	0.76	4890	3549	4220	-0.43	0.0273	3443	4569	4006	0.35	0.0397	AMD1_0385	4883.67	30.6667	14651	92
AMD1_0386	Putative thiol oxidoreductase	378856	380472	1617	1	2790	2741	2765	-0.0238	0.92	2606	2272	2439	-0.19	0.34	2204	2504	2354	0.16	0.32	AMD1_0386	2674	85	8022	255
AMD1_0387	Iron-regulated protein A precursor	380472	381545	1074	3	447	465	456	0.0516	0.8	417	462	440	0.14	0.46	448	425	436	-0.0672	0.73	AMD1_0387	452.667	31.3333	1358	94
AMD1_0388	conserved protein of unknown function	381556	382665	1110	1	271	288	279	0.0813	0.71	253	281	267	0.14	0.49	272	263	267	-0.0423	0.84	AMD1_0388	280.667	56.3333	842	169
AMD1_0389	Ribose 1,5-bisphosphate phosphokinase PhnN	382687	383316	630	-2	281	371	326	0.37	0.0379	262	337	300	0.33	0.1	326	339	333	0.0483	0.81	AMD1_0389	362	57.6667	1086	173
AMD1_0390	protein of unknown function	383288	383497	210	-1	180	203	191	0.15	0.51	168	222	195	0.37	0.0899	215	185	200	-0.17	0.39	AMD1_0390	197.667	3.66667	593	11
AMD1_0391	protein of unknown function	383452	383631	180	1																AMD1_0391	3.33333	81.3333	10	244
AMD1_0392	Peptide chain release factor 3	384020	385612	1593	-1	1458	1447	1453	-0.0105	0.96	1361	1805	1583	0.39	0.00571	1751	1322	1536	-0.37	0.0115	AMD1_0392	1409.33	110.333	4228	331
AMD1_0393	DNA alkylation repair enzyme	385737	386843	1107	-3	388	346	367	-0.15	0.51	362	337	350	-0.0958	0.71	326	316	321	-0.0431	0.84	AMD1_0393	337	54.6667	1011	164
AMD1_0394	Activator of HSP90 ATPase	387045	387482	438	3	194	180	187	-0.1	0.69	181	168	175	-0.1	0.74	163	164	164	0.0116	0.97	AMD1_0394	175.667	29	527	87
AMD1_0395	protein of unknown function	387521	387655	135	-1	20	18	19	-0.0742	0.87	19	15	17	-0.19	0.66	14	17	16	0.0646	0.81	AMD1_0395	18	41	54	123
AMD1_0396	protein of unknown function	387645	387878	234	-3	31	27	29	-0.16	0.7	29	20	25	-0.39	0.3	20	25	22	0.14	0.6	AMD1_0396	26.3333	15.6667	79	47
AMD1_0397	Glyoxalase-like domain protein	387868	388278	411	-2	101	93	97	-0.12	0.69	95	82	88	-0.19	0.48	79	85	82	0.0622	0.81	AMD1_0397	90	19.6667	270	59
AMD1_0398	Glyoxalase-like domain protein	388321	388716	396	-2	84	76	80	-0.14	0.67	78	80	79	0.0226	0.95	78	69	73	-0.12	0.62	AMD1_0398	73.6667	100.333	221	301
AMD1_0399	L-rhamnose operon regulatory protein RhaS	388826	389605	780	-1	115	99	107	-0.19	0.49	107	121	114	0.15	0.59	117	90	104	-0.28	0.22	AMD1_0399	95.6667	30.6667	287	92
AMD1_0400	Amidohydrolase EgtC	389693	390487	795	-1	950	899	924	-0.0756	0.66	887	777	832	-0.18	0.27	753	821	787	0.11	0.51	AMD1_0400	876	17.3333	2628	52
AMD1_0401	Deoxyuridine 5'-triphosphate nucleotidohydrolase	390738	391217	480	3	350	402	376	0.19	0.27	327	528	427	0.67	5.53e-06	512	368	440	-0.44	0.00318	AMD1_0401	392.667	47	1178	141
AMD1_0402	Putative phosphatase YieH	391214	391870	657	2	409	457	433	0.15	0.5	382	659	520	0.76	4.83e-06	639	417	528	-0.57	0.000322	AMD1_0402	444.667	64.6667	1334	194
AMD1_0403	Methylisocitrate lyase	391939	392745	807	1	313	281	297	-0.15	0.49	293	212	252	-0.44	0.018	206	257	231	0.27	0.14	AMD1_0403	274	87.3333	822	262
AMD1_0404	CysZ-like protein	392799	393521	723	-3	193	162	178	-0.2	0.55	180	136	158	-0.34	0.22	132	148	140	0.0926	0.73	AMD1_0404	159.667	120	479	360
AMD1_0405	Putative sugar kinase YdjH	393692	394684	993	2	955	994	975	0.0557	0.77	892	1313	1102	0.54	0.00035	1274	908	1091	-0.45	0.00148	AMD1_0405	969.333	29.6667	2908	89
AMD1_0406	Antitoxin HigA	395449	396237	789	1	1501	1637	1569	0.12	0.46	1401	1243	1322	-0.16	0.34	1206	1495	1351	0.28	0.0563	AMD1_0406	1597.33	84.3333	4792	253
AMD1_0407	N-acetyltransferase domain-containing protein	396212	397747	1536	2	1803	1964	1883	0.12	0.38	1684	1640	1662	-0.0356	0.87	1590	1793	1692	0.15	0.38	AMD1_0407	1914.33	1259	5743	3777
AMD1_0408	conserved protein of unknown function	397744	398280	537	1	541	637	589	0.23	0.12	506	482	494	-0.0605	0.8	468	582	525	0.27	0.11	AMD1_0408	621.333	1664.67	1864	4994
AMD1_0409	protein of unknown function	398313	398747	435	-3	660	710	685	0.0981	0.69	617	655	636	0.0804	0.73	635	649	642	0.0271	0.9	AMD1_0409	693.667	285	2081	855
AMD1_0410	NADP-dependent malic enzyme	398548	400836	2289	-2	1984	1903	1943	-0.0571	0.78	1853	1746	1799	-0.0818	0.65	1693	1737	1715	0.0316	0.87	AMD1_0410	1859.33	384	5578	1152
AMD1_0411	DNA mismatch repair protein MutS	400960	403704	2745	1	2615	2014	2314	-0.36	0.00481	2442	2488	2465	0.0246	0.92	2413	1839	2126	-0.35	0.0214	AMD1_0411	1963	239.333	5889	718
AMD1_0412	Addiction module antitoxin	403715	407806	4092	-1	5189	4657	4923	-0.14	0.5	4845	3938	4391	-0.28	0.16	3820	4252	4036	0.12	0.57	AMD1_0412	4562	620.333	13686	1861
AMD1_0413	protein of unknown function	407938	408093	156	1	38	39	39	0.0303	0.95	36	29	33	-0.23	0.56	28	36	32	0.18	0.5	AMD1_0413	38.3333	144	115	432
AMD1_0414	putative glutathione S-transferase-related transmembrane protein	408117	408605	489	-3	355	363	359	0.0275	0.92	332	293	312	-0.16	0.47	284	332	308	0.18	0.37	AMD1_0414	353	16.6667	1059	50
AMD1_0415	Transcriptional regulator, ArsR family	408602	408934	333	-1	189	200	194	0.0679	0.8	177	172	174	-0.0373	0.89	166	182	174	0.0989	0.65	AMD1_0415	194	5.66667	582	17
AMD1_0416	conserved protein of unknown function	409149	409304	156	3	78	63	71	-0.25	0.44	73	69	71	-0.0681	0.84	67	58	63	-0.13	0.62	AMD1_0416	61.3333	1	184	3
AMD1_0417	Carminomycin 4-O-methyltransferase	409388	410374	987	2	408	361	384	-0.17	0.4	381	310	345	-0.28	0.2	301	329	315	0.1	0.64	AMD1_0417	351.667	12.3333	1055	37
AMD1_0418	Transcriptional activator FtrA	410377	411120	744	1	834	930	882	0.15	0.35	779	603	691	-0.35	0.0572	584	850	717	0.49	0.00348	AMD1_0418	905.667	8.66667	2717	26
AMD1_0419	Putative epoxide hydrolase	411256	412380	1125	1	63	60	62	-0.0579	0.87	59	48	54	-0.25	0.42	47	55	51	0.15	0.55	AMD1_0419	58.6667	53	176	159
AMD1_0420	Bacillibactin transport regulator	412408	413433	1026	-2	17	25	21	0.39	0.32	16	16	16	0.0135	0.98	16	23	19	0.21	0.4	AMD1_0420	24.6667	26.3333	74	79
AMD1_0421	Putative dienelactone hydrolase	413520	414635	1116	3	9.14	16	12	0.41	0.36	8.54	15	12	0.44	0.32	14	14	14	0.00694	0.98	AMD1_0421	15.3333	43	46	129
AMD1_0422	HTH-type transcriptional regulator QacR	414683	415309	627	-1	99	111	105	0.14	0.63	92	115	103	0.28	0.28	111	102	106	-0.1	0.66	AMD1_0422	108.333	74	325	222
AMD1_0423	conserved protein of unknown function	415421	415981	561	2	405	307	356	-0.35	0.19	378	397	387	0.0606	0.85	385	280	332	-0.4	0.0316	AMD1_0423	298.333	14	895	42
AMD1_0424	conserved protein of unknown function	415965	416264	300	3	131	111	121	-0.2	0.56	122	114	118	-0.0759	0.84	111	101	106	-0.0988	0.69	AMD1_0424	107.667	20	323	60
AMD1_0425	conserved protein of unknown function	416307	416960	654	-3	257	265	261	0.0405	0.86	240	149	195	-0.66	0.000152	144	242	193	0.69	7.49e-05	AMD1_0425	258.333	63.6667	775	191
AMD1_0426	Putative diguanylate cyclase YegE	417229	419706	2478	1	1947	1771	1859	-0.13	0.49	1819	1083	1451	-0.72	3.03e-05	1051	1618	1334	0.57	0.000387	AMD1_0426	1723.67	41.6667	5171	125
AMD1_0427	conserved exported protein of unknown function	419778	420083	306	3	175	162	168	-0.0987	0.7	163	102	132	-0.62	0.00471	99	148	123	0.49	0.0182	AMD1_0427	158.333	63	475	189
AMD1_0428	methylglyoxal reductase YeaE	420090	420929	840	-3	916	945	930	0.041	0.86	855	1138	996	0.39	0.0207	1103	863	983	-0.3	0.0834	AMD1_0428	919.333	93	2758	279
AMD1_0429	conserved exported protein of unknown function	421011	421403	393	-3	924	932	928	0.00996	0.98	863	1101	982	0.32	0.18	1067	852	959	-0.27	0.16	AMD1_0429	910.333	16	2731	48
AMD1_0430	Copper-transporting P-type ATPase	421432	423927	2496	-2	3754	3816	3785	0.0208	0.94	3504	4983	4243	0.47	0.03	4830	3486	4158	-0.41	0.0156	AMD1_0430	3715	118	11145	354
AMD1_0431	[Protein-PII] uridylyltransferase / [Protein-PII]-UMP uridylyl-removing enzyme	424231	427026	2796	1	2416	2396	2406	-0.0118	0.95	2256	2215	2236	-0.0232	0.9	2148	2189	2169	0.0234	0.9	AMD1_0431	2334.67	85	7004	255
AMD1_0432	putative lipid II flippase MurJ	427073	428671	1599	2	1129	1064	1096	-0.0819	0.63	1054	1154	1104	0.13	0.42	1119	972	1045	-0.18	0.22	AMD1_0432	1036.33	47	3109	141
AMD1_0433	Tryptophan--tRNA ligase	428814	429884	1071	3	1867	2009	1938	0.1	0.52	1744	2473	2108	0.49	0.000173	2398	1835	2116	-0.36	0.00477	AMD1_0433	1960.67	119.667	5882	359
AMD1_0434	Universal stress protein UspA and related nucleotide-binding proteins	429966	430457	492	3	1645	1628	1636	-0.0144	0.94	1536	1547	1541	0.00883	0.97	1500	1487	1493	-0.0108	0.96	AMD1_0434	1585	17.6667	4755	53
AMD1_0435	NifU protein	430579	431154	576	1	1415	1866	1640	0.39	0.000885	1321	2046	1684	0.61	1.13e-05	1984	1704	1844	-0.19	0.21	AMD1_0435	1822.67	38.3333	5468	115
AMD1_0436	Putative L,D-transpeptidase ErfK/SrfK	431386	432006	621	-2	1439	1759	1599	0.28	0.0795	1344	860	1102	-0.61	0.000421	834	1607	1221	0.91	3.84e-09	AMD1_0436	1714.67	77.6667	5144	233
AMD1_0437	conserved protein of unknown function	432303	432803	501	3	244	290	267	0.23	0.26	228	247	238	0.11	0.64	240	264	252	0.12	0.54	AMD1_0437	281.667	35.6667	845	107
AMD1_0438	Acid tolerance regulatory protein ActR	432880	433440	561	-2	1354	1093	1224	-0.29	0.0817	1265	1127	1196	-0.15	0.51	1093	998	1046	-0.1	0.61	AMD1_0438	1067.33	274.333	3202	823
AMD1_0439	Sensor histidine kinase RegB	433554	434879	1326	-3	244	300	272	0.28	0.0982	228	267	247	0.21	0.29	259	274	266	0.068	0.74	AMD1_0439	292.667	75.6667	878	227
AMD1_0440	ATP-dependent RNA helicase HrpB	434984	437443	2460	-1	353	321	337	-0.13	0.49	330	409	370	0.29	0.11	397	293	345	-0.39	0.0188	AMD1_0440	313	18	939	54
AMD1_0441	Opacity protein antigen	437605	438249	645	-2	630	639	635	0.0202	0.93	589	882	735	0.56	0.00117	856	584	720	-0.5	0.00181	AMD1_0441	623.667	74.3333	1871	223
AMD1_0442	ATP-dependent RNA helicase HrpB	438429	438638	210	-3	180	177	178	-0.0249	0.93	168	173	170	0.045	0.88	168	161	165	-0.047	0.86	AMD1_0442	172.333	13.6667	517	41
AMD1_0443	conserved protein of unknown function	438789	438998	210	-3	383	415	399	0.11	0.59	357	315	336	-0.17	0.41	306	379	343	0.26	0.15	AMD1_0443	405	4.66667	1215	14
AMD1_0444	conserved membrane protein of unknown function	439281	440009	729	3	115	66	90	-0.73	0.00332	107	112	109	0.0508	0.87	108	60	84	-0.74	0.00132	AMD1_0444	64.6667	22.6667	194	68
AMD1_0445	Glucose--fructose oxidoreductase	440090	441199	1110	-1	198	116	157	-0.73	0.000238	185	127	156	-0.51	0.0226	123	106	114	-0.17	0.44	AMD1_0445	112.667	60.6667	338	182
AMD1_0446	protein of unknown function	440678	441328	651	2	166	143	155	-0.18	0.49	155	162	158	0.0535	0.86	157	131	144	-0.2	0.34	AMD1_0446	139.667	55.3333	419	166
AMD1_0447	Predicted transcriptional regulator of the myo-inositol catabolic operon	441340	442218	879	1	360	343	351	-0.0635	0.78	336	368	352	0.13	0.53	357	313	335	-0.16	0.34	AMD1_0447	334.667	15.6667	1004	47
AMD1_0448	dihydroxy-acid dehydratase	442359	444200	1842	3	3623	3995	3809	0.14	0.33	3383	4143	3763	0.28	0.13	4018	3648	3833	-0.12	0.54	AMD1_0448	3896.67	112	11690	336
AMD1_0449	conserved exported protein of unknown function	444451	444918	468	1	301	317	309	0.0676	0.78	281	235	258	-0.25	0.26	227	289	258	0.29	0.13	AMD1_0449	308	23.3333	924	70
AMD1_0450	protein of unknown function	444956	445174	219	-1	39	27	33	-0.43	0.24	37	29	33	-0.26	0.51	28	24	26	-0.0961	0.72	AMD1_0450	26	90	78	270
AMD1_0451	protein of unknown function	445129	445194	66	-2	25	16	20	-0.46	0.26	23	21	22	-0.13	0.77	20	14	17	-0.18	0.47	AMD1_0451	15.3333	46	46	138
AMD1_0452	Cystathionine beta-synthase	445533	446954	1422	3	628	659	643	0.0574	0.87	586	2973	1780	2.16	7.57e-06	2887	602	1744	-2.01	0.00013	AMD1_0452	638	19.3333	1914	58
AMD1_0453	Cystathionine beta-lyase	446951	448117	1167	2	380	412	396	0.0955	0.78	355	1646	1000	2.16	1.02e-15	1597	376	987	-2.02	1.93e-13	AMD1_0453	400.333	21.3333	1201	64
AMD1_0454	protein of unknown function	448154	448474	321	-1																AMD1_0454	4.66667	2.33333	14	7
AMD1_0457	protein of unknown function	449016	449369	354	3	43	55	49	0.29	0.4	40	173	107	2.02	2.21e-09	168	50	109	-1.64	1.63e-07	AMD1_0457	54	43.3333	162	130
AMD1_0458	HTH-type transcriptional regulator PecS	449335	449823	489	-2	101	124	113	0.26	0.25	95	102	98	0.0989	0.73	99	113	106	0.15	0.51	AMD1_0458	121	53	363	159
AMD1_0459	Protein PecM	449912	450790	879	2	-	-			-	5.55	15	10	1.01	0.0485	15	8.72	12	-0.24	0.31	AMD1_0459	9.33333	20.3333	28	61
AMD1_0460	taurine ABC transporter membrane subunit	450794	451651	858	-1	39	26	33	-0.46	0.23	37	77	57	0.99	0.000282	74	24	49	-1.54	2.81e-06	AMD1_0460	25	11	75	33
AMD1_0461	taurine ABC transporter ATP binding subunit	451648	452421	774	-2	25	17	21	-0.38	0.35	23	83	53	1.72	1.34e-06	81	15	48	-2.27	9.26e-09	AMD1_0461	16.3333	7.33333	49	22
AMD1_0462	taurine ABC transporter periplasmic binding protein	452512	453525	1014	-2	70	61	65	-0.16	0.63	65	345	205	2.36	3.32e-19	334	56	195	-2.54	7.88e-21	AMD1_0462	59	18	177	54
AMD1_0463	conserved protein of unknown function	453711	453986	276	-3	135	47	91	-1.44	9.25e-08	126	44	85	-1.43	3.27e-06	43	43	43	0.00981	0.98	AMD1_0463	46.3333	4.66667	139	14
AMD1_0464	Multidrug resistance protein MdtE	454212	455342	1131	3	572	404	488	-0.48	0.00531	534	205	369	-1.36	5.37e-16	199	369	284	0.85	4.04e-07	AMD1_0464	394.333	23	1183	69
AMD1_0465	Efflux pump periplasmic linker BepF	455339	456403	1065	2	404	332	368	-0.26	0.23	377	183	280	-1.01	2.2e-08	177	303	240	0.7	0.000702	AMD1_0465	325.333	12	976	36
AMD1_0466	protein of unknown function	456405	459608	3204	3	1508	1439	1473	-0.0615	0.81	1408	659	1033	-1.07	1.96e-13	639	1314	977	0.99	8.41e-08	AMD1_0466	1408	92.6667	4224	278
AMD1_0467	membrane protein of unknown function	457444	459486	2043	1	1024	999	1012	-0.0329	0.91	956	463	710	-1.02	4.77e-12	449	912	681	0.97	2.98e-07	AMD1_0467	977.667	63.3333	2933	190
AMD1_0468	High-affinity branched-chain amino acid transport ATP-binding protein BraG	459505	460221	717	-2	84	102	93	0.25	0.33	78	52	65	-0.53	0.0451	50	93	72	0.78	0.00124	AMD1_0468	99	144	297	432
AMD1_0469	Lipopolysaccharide export system ATP-binding protein LptB	460202	460966	765	-1	60	62	61	0.0488	0.9	56	40	48	-0.42	0.19	38	57	48	0.41	0.1	AMD1_0469	60.6667	19.3333	182	58
AMD1_0470	Leucine/isoleucine/valine transporter permease subunit	460963	461973	1011	-2	127	141	134	0.14	0.63	118	84	101	-0.44	0.0657	81	129	105	0.57	0.00718	AMD1_0470	137	29.3333	411	88
AMD1_0471	LIV-I protein H	461974	462873	900	-2	153	185	169	0.24	0.29	143	95	119	-0.55	0.02	92	169	130	0.8	0.00032	AMD1_0471	180	53	540	159
AMD1_0472	Leu/Ile/Val-binding protein homolog 6	462901	464085	1185	-2	406	537	472	0.38	0.0199	379	248	314	-0.56	0.0118	240	490	365	0.96	3.15e-06	AMD1_0472	525	54	1575	162
AMD1_0473	p-hydroxybenzoate hydroxylase	464225	465397	1173	-1	131	152	142	0.19	0.41	123	99	111	-0.28	0.24	96	139	118	0.45	0.0254	AMD1_0473	148.333	105.667	445	317
AMD1_0474	3-carboxy-cis,cis-muconate cycloisomerase	465487	466551	1065	-2	101	100	100	-0.012	0.98	94	71	83	-0.36	0.15	69	91	80	0.31	0.16	AMD1_0474	97	3.66667	291	11
AMD1_0475	Protocatechuate 3,4-dioxygenase alpha chain	466556	467170	615	-1	105	112	108	0.0807	0.8	98	66	82	-0.5	0.0632	64	102	83	0.54	0.0228	AMD1_0475	109.333	10.3333	328	31
AMD1_0476	Protocatechuate 3,4-dioxygenase beta chain	467170	467925	756	-2	84	85	84	0.0149	0.97	78	45	62	-0.72	0.00636	44	77	61	0.7	0.00527	AMD1_0476	82.6667	18.3333	248	55
AMD1_0477	4-carboxymuconolactone decarboxylase	467922	468320	399	-3	93	97	95	0.0493	0.88	87	61	74	-0.47	0.0808	59	89	74	0.47	0.0431	AMD1_0477	94.6667	3.66667	284	11
AMD1_0478	Beta-ketoadipate enol-lactone hydrolase	468328	469125	798	-2	175	185	180	0.0716	0.78	164	115	139	-0.48	0.0248	112	169	140	0.53	0.00732	AMD1_0478	180.333	9.66667	541	29
AMD1_0479	HTH-type transcriptional regulator PcaQ	469220	470137	918	2	249	283	266	0.17	0.38	233	235	234	0.0113	0.97	228	259	243	0.15	0.47	AMD1_0479	275.667	23.3333	827	70
AMD1_0480	Protein FixR	470206	470958	753	1	1478	1380	1429	-0.0928	0.67	1380	1907	1643	0.45	0.000147	1849	1261	1555	-0.51	0.000868	AMD1_0480	1340.33	40.3333	4021	121
AMD1_0481	Uncharacterized aminotransferase y4uB	471063	472433	1371	-3	708	971	840	0.43	0.00863	662	952	807	0.5	0.00862	923	887	905	-0.0458	0.84	AMD1_0481	950	65.6667	2850	197
AMD1_0482	HTH-type transcriptional regulator McbR	472626	473312	687	3	214	197	205	-0.11	0.69	200	206	203	0.0419	0.88	200	180	190	-0.12	0.58	AMD1_0482	191	12.3333	573	37
AMD1_0483	L-2-hydroxyglutarate oxidase LhgO	473314	474435	1122	1	255	265	260	0.0539	0.83	238	260	249	0.12	0.6	252	242	247	-0.0462	0.84	AMD1_0483	258.333	37	775	111
AMD1_0484	NADP(+)-dependent succinate-semialdehyde dehydrogenase	474518	475951	1434	2	393	458	425	0.2	0.33	367	492	430	0.4	0.0307	477	418	448	-0.16	0.35	AMD1_0484	447.333	49.6667	1342	149
AMD1_0485	Leucine-responsive regulatory protein	475994	476458	465	-1	147	156	152	0.0712	0.82	138	119	129	-0.18	0.48	116	142	129	0.23	0.26	AMD1_0485	152	59.3333	456	178
AMD1_0486	Alanine racemase, catabolic	476589	477722	1134	3	1143	779	961	-0.52	0.00371	1067	334	701	-1.64	4.03e-18	324	712	518	1.09	2.85e-09	AMD1_0486	757	28.6667	2271	86
AMD1_0487	D-amino acid dehydrogenase	477738	478991	1254	3	180	215	198	0.21	0.47	168	105	137	-0.62	0.024	102	197	149	0.87	0.000171	AMD1_0487	209	40.6667	627	122
AMD1_0488	Lipoprotein	479070	480281	1212	-3	339	332	335	-0.0276	0.92	316	248	282	-0.33	0.1	241	303	272	0.27	0.15	AMD1_0488	322.333	14	967	42
AMD1_0489	Soluble lytic murein transglycosylase	480400	481185	786	-2	219	219		-0.00195	1	204	129	167	-0.61	0.0139	125	200	162	0.56	0.0205	AMD1_0489	212.333	6	637	18
AMD1_0490	conserved exported protein of unknown function	481211	481585	375	-1	409	396	403	-0.0446	0.87	382	204	293	-0.87	1.26e-06	198	362	280	0.81	3.1e-06	AMD1_0490	384.667	40.6667	1154	122
AMD1_0491	conserved protein of unknown function	481673	482014	342	-1	430	446	438	0.0504	0.84	402	341	371	-0.22	0.26	331	408	369	0.26	0.14	AMD1_0491	434	7.66667	1302	23
AMD1_0492	Poly(Beta-D-mannuronate) C5 epimerase 2	482091	494975	12885	-3	8275	8736	8506	0.0759	0.59	7727	5438	6582	-0.5	3.02e-05	5273	7980	6627	0.57	1.68e-06	AMD1_0492	8508	726.667	25524	2180
AMD1_0493	protein of unknown function	495047	495361	315	-1	93	72	82	-0.32	0.24	87	56	71	-0.57	0.0232	54	66	60	0.19	0.44	AMD1_0493	70	291	210	873
AMD1_0494	Malate dehydrogenase	495192	496238	1047	-3	-	-			-	12	13	12	0.065	0.89	13	10	11	-0.0875	0.73	AMD1_0494	11	174.333	33	523
AMD1_0495	(S)-sulfolactate dehydrogenase	496241	497203	963	-1	33	40	37	0.2	0.59	31	32	32	0.0162	0.97	31	37	34	0.14	0.6	AMD1_0495	39	34	117	102
AMD1_0496	L-lactate dehydrogenase operon regulatory protein	497255	498043	789	-1	557	513	535	-0.11	0.58	520	392	456	-0.39	0.0213	380	469	424	0.26	0.1	AMD1_0496	499.333	22.3333	1498	67
AMD1_0497	conserved protein of unknown function	498040	499116	1077	-2	457	427	442	-0.0947	0.64	427	348	388	-0.28	0.16	338	390	364	0.17	0.38	AMD1_0497	415	5	1245	15
AMD1_0498	murein tripeptide ABC transporter/oligopeptide ABC transporter ATP binding subunit OppF	499113	500105	993	-3	79	73	76	-0.0913	0.79	73	76	75	0.0463	0.89	73	67	70	-0.095	0.72	AMD1_0498	71.3333	18.3333	214	55
AMD1_0499	murein tripeptide ABC transporter/oligopeptide ABC transporter ATP binding subunit OppD	500105	501115	1011	-1	106	98	102	-0.092	0.78	99	106	103	0.0994	0.74	103	89	96	-0.15	0.52	AMD1_0499	95.6667	47.3333	287	142
AMD1_0500	Stage 0 sporulation protein KC	501112	502077	966	-2	60	76	68	0.3	0.34	56	73	64	0.34	0.24	71	70	70	-0.0106	0.98	AMD1_0500	74.6667	44	224	132
AMD1_0501	Oligopeptide transport system permease protein OppB	502079	503035	957	-1	61	87	74	0.46	0.0729	57	71	64	0.27	0.35	69	80	74	0.15	0.53	AMD1_0501	85.3333	90.6667	256	272
AMD1_0502	Periplasmic oligopeptide-binding protein	503118	504770	1653	-3	292	329	310	0.16	0.5	273	297	285	0.12	0.61	288	300	294	0.0435	0.85	AMD1_0502	321.667	31.3333	965	94
AMD1_0503	Putative D-threonate 4-phosphate dehydrogenase	505156	506145	990	1	71	67	69	-0.0805	0.82	67	87	77	0.33	0.19	84	61	73	-0.34	0.15	AMD1_0503	65.3333	31	196	93
AMD1_0504	4-hydroxy-tetrahydrodipicolinate synthase	506142	507047	906	3	85	86	85	0.0176	0.96	79	127	103	0.63	0.00545	123	78	101	-0.55	0.00996	AMD1_0504	84	46.3333	252	139
AMD1_0505	Putative neuraminidase (Sialidase)	507058	508263	1206	1	110	100	105	-0.12	0.68	103	122	112	0.22	0.37	118	92	105	-0.29	0.17	AMD1_0505	98	79	294	237
AMD1_0506	NAD-dependent methanol dehydrogenase	508304	509434	1131	2	72	59	66	-0.24	0.46	67	89	78	0.36	0.17	86	54	70	-0.53	0.0312	AMD1_0506	58	33	174	99
AMD1_0507	Phenylacetate-coenzyme A ligase	509453	510691	1239	-1	149	120	135	-0.28	0.26	139	48	94	-1.48	3.86e-10	47	110	78	1.14	6.58e-06	AMD1_0507	117	18.3333	351	55
AMD1_0508	branched chain amino acid/phenylalanine ABC transporter ATP binding subunit LivF	510769	511623	855	-2	192	146	169	-0.34	0.17	179	48	114	-1.81	8.33e-11	47	134	90	1.4	1.48e-06	AMD1_0508	142	19	426	57
AMD1_0509	Peripla_BP_6 domain-containing protein	511670	513001	1332	-1	836	629	733	-0.39	0.0143	781	200	491	-1.93	2.99e-28	194	575	385	1.53	1.9e-21	AMD1_0509	613	68	1839	204
AMD1_0510	Leucine/isoleucine/valine transporter permease subunit	513050	514126	1077	-1	248	203	225	-0.27	0.18	231	64	148	-1.79	1.68e-15	63	185	124	1.49	1.7e-10	AMD1_0510	197.333	60.3333	592	181
AMD1_0511	LIV-I protein H	514131	515105	975	-3	472	347	410	-0.4	0.0634	441	92	266	-2.23	2.97e-26	89	317	203	1.8	2.34e-20	AMD1_0511	337.667	21.6667	1013	65
AMD1_0512	Lipopolysaccharide export system ATP-binding protein LptB	515237	516016	780	-1	483	289	386	-0.67	0.00593	451	81	266	-2.44	2.78e-27	79	264	172	1.69	3.1e-13	AMD1_0512	280.333	25.6667	841	77
AMD1_0513	Long-chain-fatty-acid--CoA ligase	516013	517986	1974	-2	823	589	706	-0.45	0.00869	769	205	487	-1.88	1.08e-19	199	538	369	1.39	6.02e-11	AMD1_0513	574.667	116.333	1724	349
AMD1_0514	transcriptional regulator, Crp/Fnr family	518205	518879	675	-3	458	428	443	-0.0924	0.65	427	389	408	-0.13	0.52	377	391	384	0.0439	0.84	AMD1_0514	416.333	8	1249	24
AMD1_0515	protein of unknown function	518782	519018	237	1																AMD1_0515	4.66667	255	14	765
AMD1_0516	Integral membrane protein, YjbE family	519212	519868	657	2	53	49	51	-0.0934	0.81	49	61	55	0.26	0.41	59	44	52	-0.27	0.27	AMD1_0516	47.3333	5	142	15
AMD1_0517	protein of unknown function	519986	520222	237	2	39	35	37	-0.12	0.76	37	31	34	-0.21	0.59	30	32	31	0.0567	0.84	AMD1_0517	34.3333	3.33333	103	10
AMD1_0518	protein of unknown function	520232	520813	582	2	500	409	455	-0.27	0.23	467	453	460	-0.0452	0.86	439	373	406	-0.18	0.41	AMD1_0518	396	96.6667	1188	290
AMD1_0519	protein of unknown function	520835	521017	183	2	43	36	40	-0.21	0.56	41	36	38	-0.14	0.71	35	33	34	-0.0428	0.88	AMD1_0519	35.3333	51.3333	106	154
AMD1_0520	putative membrane transporter protein	521032	521838	807	-2	218	204	211	-0.0936	0.71	204	182	193	-0.16	0.47	176	186	181	0.0641	0.77	AMD1_0520	199	98.3333	597	295
AMD1_0521	membrane protein of unknown function	522206	522634	429	2	68	70	69	0.0293	0.94	63	95	79	0.5	0.067	92	64	78	-0.38	0.11	AMD1_0521	68.3333	8.66667	205	26
AMD1_0522	protein of unknown function	522595	522789	195	1																AMD1_0522	5.66667	4	17	12
AMD1_0523	protein of unknown function	522928	523599	672	1	142	134	138	-0.0703	0.8	132	130	131	-0.0261	0.93	126	123	124	-0.0267	0.92	AMD1_0523	130.667	10	392	30
AMD1_0524	protein of unknown function	523568	523867	300	2	54	65	60	0.22	0.55	50	55	53	0.11	0.76	54	60	57	0.0915	0.73	AMD1_0524	63.3333	19.6667	190	59
AMD1_0525	protein of unknown function	523797	524294	498	3	33	35	34	0.0663	0.88	30	37	34	0.23	0.56	36	32	34	-0.0927	0.73	AMD1_0525	33.6667	106	101	318
AMD1_0526	GTP 3',8-cyclase	524654	525664	1011	-1	3772	2221	2996	-0.74	2.28e-07	3521	3650	3586	0.0486	0.83	3539	2029	2784	-0.76	3.31e-07	AMD1_0526	2162.67	145.333	6488	436
AMD1_0527	carbon monoxide dehydrogenase E protein	525651	526673	1023	-3	1153	1066	1109	-0.11	0.53	1077	889	983	-0.27	0.0554	862	973	918	0.15	0.34	AMD1_0527	1036.33	239	3109	717
AMD1_0528	carbon monoxide dehydrogenase D protein	526771	527682	912	-2	725	686	706	-0.0771	0.72	677	633	655	-0.0935	0.62	614	627	620	0.0247	0.91	AMD1_0528	667	59	2001	177
AMD1_0529	Aldehyde oxidase and xanthine dehydrogenase molybdopterin binding protein	527740	530154	2415	-2	1430	1421	1425	-0.00968	0.96	1335	1329	1332	-0.00652	0.97	1289	1297	1293	0.00796	0.97	AMD1_0529	1384	231.667	4152	695
AMD1_0530	6-hydroxypseudooxynicotine dehydrogenase complex subunit alpha	530707	531588	882	-2	330	257	293	-0.34	0.0571	308	264	286	-0.21	0.33	256	234	245	-0.11	0.6	AMD1_0530	249.667	66.6667	749	200
AMD1_0531	carbon monoxide dehydrogenase G protein	531656	532312	657	-1	102	67	84	-0.56	0.0176	95	77	86	-0.27	0.33	75	61	68	-0.19	0.44	AMD1_0531	65	28.6667	195	86
AMD1_0532	protein of unknown function	532534	532716	183	-2	84	87	85	0.0362	0.91	78	83	81	0.059	0.88	81	79	80	-0.00994	0.98	AMD1_0532	84.3333	56	253	168
AMD1_0533	L-serine dehydratase	532802	534187	1386	-1	979	902	940	-0.11	0.48	914	841	878	-0.12	0.5	816	824	820	0.0127	0.95	AMD1_0533	878.333	74.3333	2635	223
AMD1_0534	glycine decarboxylase	534221	537073	2853	-1	546	483	514	-0.17	0.29	510	432	471	-0.23	0.19	419	441	430	0.0604	0.75	AMD1_0534	471	82.3333	1413	247
AMD1_0535	glycine cleavage system H protein	537084	537449	366	-3	87	86	86	-0.0104	0.98	81	65	73	-0.27	0.33	63	78	71	0.21	0.37	AMD1_0535	84	35.6667	252	107
AMD1_0536	Aminomethyltransferase (glycine cleavage system T protein)	537461	538558	1098	-1	282	214	248	-0.38	0.0201	263	194	229	-0.42	0.0248	188	195	192	0.0476	0.83	AMD1_0536	208.667	29	626	87
AMD1_0537	lipoyl synthase	538561	539508	948	-2	152	174	163	0.17	0.46	142	141	142	-0.00632	0.98	137	159	148	0.16	0.44	AMD1_0537	169	44	507	132
AMD1_0538	Dihydrolipoyl dehydrogenase 3	539529	540929	1401	-3	295	259	277	-0.17	0.4	275	232	254	-0.23	0.27	225	236	231	0.0569	0.79	AMD1_0538	252	104.333	756	313
AMD1_0539	serine hydroxymethyltransferase	540926	542248	1323	-1	374	318	346	-0.22	0.25	349	313	331	-0.15	0.45	304	291	297	-0.0515	0.81	AMD1_0539	309.667	50.3333	929	151
AMD1_0540	High-affinity branched-chain amino acid transport ATP-binding protein BraG	542506	543216	711	-2	514	503	508	-0.0291	0.9	479	386	432	-0.29	0.12	374	460	417	0.25	0.13	AMD1_0540	490	78.6667	1470	236
AMD1_0541	conserved membrane protein of unknown function	543221	544330	1110	-1	297	281	289	-0.072	0.76	277	229	253	-0.25	0.22	222	257	239	0.17	0.35	AMD1_0541	274.333	161	823	483
AMD1_0542	Branched-chain amino acid ABC transporter permease	544327	545241	915	-2	278	291	284	0.0622	0.79	260	235	247	-0.14	0.52	228	266	247	0.19	0.29	AMD1_0542	283.667	444	851	1332
AMD1_0543	ABC transporter domain-containing protein	545251	546030	780	-2	105	106		0.00275	1	98	101	99	0.0279	0.93	97	97	97	-0.0113	0.97	AMD1_0543	103	198	309	594
AMD1_0544	protein of unknown function	545563	546168	606	1	32	45	39	0.39	0.24	30	37	34	0.23	0.52	36	41	39	0.11	0.67	AMD1_0544	44	71	132	213
AMD1_0545	M20_dimer domain-containing protein	546215	547594	1380	-1	565	486	526	-0.21	0.23	528	434	481	-0.27	0.13	421	444	433	0.0656	0.73	AMD1_0545	473.333	224.667	1420	674
AMD1_0546	SnoaL-like domain-containing protein	547804	548208	405	-2	696	524	610	-0.38	0.0455	649	410	530	-0.64	1.81e-05	398	479	438	0.22	0.26	AMD1_0546	509	42.3333	1527	127
AMD1_0547	protein of unknown function	548403	548600	198	-3	170	115	143	-0.49	0.0705	158	155	157	-0.0295	0.92	150	105	128	-0.4	0.0857	AMD1_0547	111.667	175.333	335	526
AMD1_0548	putative hydantoinase/oxoprolinase subunit B	548586	550340	1755	3	1254	1403	1328	0.15	0.32	1171	989	1080	-0.23	0.18	959	1281	1120	0.37	0.0191	AMD1_0548	1364	304.333	4092	913
AMD1_0549	N-methylhydantoinase A	550347	552392	2046	3	1803	2210	2007	0.28	0.0253	1683	1521	1602	-0.14	0.35	1475	2019	1747	0.42	0.00126	AMD1_0549	2150.67	864.667	6452	2594
AMD1_0550	ABC transporter substrate-binding protein	552495	553685	1191	-3	446	391	419	-0.18	0.27	417	424	420	0.0251	0.91	411	357	384	-0.18	0.29	AMD1_0550	380.667	709.333	1142	2128
AMD1_0551	pyridine nucleotide transhydrogenase subunit beta	554277	555674	1398	-3	245	292	269	0.23	0.26	229	273	251	0.24	0.21	265	267	266	0.00727	0.98	AMD1_0551	285.333	145.667	856	437
AMD1_0552	NAD(P) transhydrogenase subunit alpha part 2	555676	556098	423	-2	26	25	25	-0.0173	0.98	24	25	25	0.048	0.92	24	23	24	-0.036	0.9	AMD1_0552	24.6667	6	74	18
AMD1_0553	NAD(P) transhydrogenase subunit alpha part 1	556098	557306	1209	-3	261	263	262	0.0161	0.95	243	261	252	0.0999	0.67	253	241	247	-0.0642	0.77	AMD1_0553	257	44.6667	771	134
AMD1_0554	N-methylhydantoinase A	557410	559449	2040	-2	1261	1477	1369	0.22	0.11	1178	1354	1266	0.19	0.26	1313	1349	1331	0.0341	0.87	AMD1_0554	1438.67	260.333	4316	781
AMD1_0555	N-methylhydantoinase B	559446	561203	1758	-3	462	444	453	-0.0539	0.79	432	501	467	0.21	0.22	486	406	446	-0.23	0.14	AMD1_0555	433.667	295.333	1301	886
AMD1_0556	FAD-binding PCMH-type domain-containing protein	561593	562462	870	2	424	490	457	0.2	0.22	396	384	390	-0.0441	0.84	372	448	410	0.24	0.12	AMD1_0556	478	190.333	1434	571
AMD1_0557	putative xanthine dehydrogenase subunit E	562465	562932	468	1	267	263	265	-0.0157	0.96	249	195	222	-0.33	0.11	189	240	215	0.29	0.0955	AMD1_0557	257	46.6667	771	140
AMD1_0558	Ald_Xan_dh_C domain-containing protein	562929	565241	2313	3	1121	1166	1143	0.0525	0.79	1047	881	964	-0.24	0.18	854	1065	960	0.28	0.0611	AMD1_0558	1138	522.667	3414	1568
AMD1_0559	Bac_luciferase domain-containing protein	565279	566268	990	1	730	837	783	0.19	0.21	682	639	661	-0.0847	0.7	620	764	692	0.26	0.13	AMD1_0559	817	98.3333	2451	295
AMD1_0560	NADPH-dependent F420 reductase	566301	566969	669	3	438	480	459	0.13	0.51	409	400	405	-0.0253	0.92	388	439	413	0.14	0.47	AMD1_0560	469.333	126	1408	378
AMD1_0561	Coenzyme F420:L-glutamate ligase	566977	567753	777	1	486	558	522	0.19	0.21	453	490	472	0.11	0.59	475	509	492	0.085	0.64	AMD1_0561	544	61.3333	1632	184
AMD1_0562	Lactyl (2) diphospho-(5')guanosine:7,8-didemethyl-8-hydroxy-5-deazariboflavin 2-phospho-L-lactate transferase	567763	568737	975	1	422	471	447	0.15	0.52	394	345	369	-0.18	0.41	334	431	382	0.33	0.0328	AMD1_0562	460	83	1380	249
AMD1_0563	Phosphoenolpyruvate guanylyltransferase	568734	569486	753	3	201	195	198	-0.0404	0.88	188	147	167	-0.31	0.21	142	178	160	0.23	0.29	AMD1_0563	190.333	244.667	571	734
AMD1_0564	7,8-didemethyl-8-hydroxy-5-deazariboflavin synthase / 5-amino-6-(D-ribitylamino)uracil--L-tyrosine 4-hydroxyphenyl transferase	569502	571943	2442	3	1287	1217	1252	-0.0779	0.7	1202	1286	1244	0.0932	0.6	1247	1111	1179	-0.15	0.36	AMD1_0564	1183.33	113.667	3550	341
AMD1_0565	HTH lysR-type domain-containing protein	572005	572931	927	1	482	527	505	0.12	0.51	451	375	413	-0.23	0.35	364	482	423	0.32	0.12	AMD1_0565	513.667	184.667	1541	554
AMD1_0566	putative Molybdenum cofactor insertion chaperone PaoD	572928	573974	1047	3	712	698	705	-0.0268	0.9	665	557	611	-0.24	0.14	540	638	589	0.2	0.21	AMD1_0566	679.333	153.667	2038	461
AMD1_0567	Alpha-ketoglutaric semialdehyde dehydrogenase	574076	575260	1185	2	468	404	436	-0.2	0.35	437	432	435	-0.0186	0.95	419	369	394	-0.15	0.47	AMD1_0567	392.333	70.6667	1177	212
AMD1_0568	protein of unknown function	575223	575600	378	-3																AMD1_0568	4	77	12	231
AMD1_0569	protein of unknown function	575628	575762	135	-3																AMD1_0569	1.33333	2.66667	4	8
AMD1_0570	protein of unknown function	575708	576184	477	-1	-	-			-	10	13	11	0.17	0.72	12	5.26	8.77	-0.45	0.12	AMD1_0570	5.66667	26.3333	17	79
AMD1_0571	protein of unknown function	575990	576421	432	2	32	33	32	0.0286	0.95	30	45	37	0.48	0.15	44	30	37	-0.32	0.22	AMD1_0571	32	29	96	87
AMD1_0572	protein of unknown function	576528	576797	270	-3	28	20	24	-0.34	0.4	26	25	26	-0.0483	0.92	25	19	22	-0.16	0.53	AMD1_0572	20	1.33333	60	4
AMD1_0575	conserved protein of unknown function	578076	579617	1542	3	24	29	26	0.17	0.7	22	26	24	0.17	0.69	25	26	26	0.0173	0.96	AMD1_0575	27.6667	8	83	24
AMD1_0576	protein of unknown function	579736	580050	315	1	56	52	54	-0.0825	0.82	52	49	50	-0.0783	0.83	47	47	47	0.00257	0.99	AMD1_0576	50.3333	4	151	12
AMD1_0577	protein of unknown function	580370	580483	114	2	34	33	34	-0.0567	0.89	32	31	32	-0.0506	0.91	30	30	30	0.00334	0.99	AMD1_0577	32	8.33333	96	25
AMD1_0578	protein of unknown function	580575	580772	198	3	29	18	23	-0.48	0.22	27	22	25	-0.19	0.64	22	17	19	-0.16	0.53	AMD1_0578	17.6667	27.3333	53	82
AMD1_0579	Protein kinase domain-containing protein	580960	582888	1929	-2	4088	4145	4116	0.0189	0.93	3818	3040	3429	-0.32	0.0242	2948	3787	3367	0.33	0.0103	AMD1_0579	4033	258	12099	774
AMD1_0580	putative Serine/threonine-protein phosphatase 3	582885	583682	798	-3	1331	1330		1.95e-05	1	1243	867	1055	-0.5	0.00053	841	1215	1028	0.5	0.000153	AMD1_0580	1297	85.3333	3891	256
AMD1_0581	VWFA domain-containing protein	583685	584353	669	-1	1567	1587	1577	0.0177	0.94	1463	869	1166	-0.72	7.05e-05	843	1449	1146	0.73	1.05e-05	AMD1_0581	1548.67	329	4646	987
AMD1_0582	protein of unknown function	584504	584680	177	2	35	60	47	0.66	0.0246	33	46	40	0.41	0.19	45	55	50	0.18	0.48	AMD1_0582	58	776.667	174	2330
AMD1_0583	Adhesin/invasin protein PagN	584763	585419	657	-3	1461	1655	1558	0.17	0.28	1365	1138	1251	-0.25	0.13	1104	1512	1308	0.42	0.00161	AMD1_0583	1612.33	89.3333	4837	268
AMD1_0584	KAP NTPase domain-containing protein	585805	587220	1416	-2	3396	3163	3279	-0.0996	0.49	3171	2081	2626	-0.59	2.1e-06	2018	2888	2453	0.49	0.000137	AMD1_0584	3082.33	648.667	9247	1946
AMD1_0585	exported protein of unknown function	587274	587615	342	-3	537	463	500	-0.2	0.31	502	294	398	-0.74	1.49e-05	286	423	354	0.52	0.000701	AMD1_0585	451	83.6667	1353	251
AMD1_0586	conserved protein of unknown function	587631	588017	387	-3	522	440	481	-0.23	0.24	487	296	392	-0.68	0.000132	287	402	345	0.43	0.014	AMD1_0586	428.333	27.3333	1285	82
AMD1_0587	protein of unknown function	587676	587897	222	3	-	-			-	11	14	12	0.22	0.63	13	12	12	-0.0625	0.81	AMD1_0587	12.3333	220.667	37	662
AMD1_0588	protein of unknown function	588024	588767	744	-3	335	281	308	-0.23	0.2	313	232	272	-0.41	0.0258	225	257	241	0.16	0.37	AMD1_0588	274.333	128.667	823	386
AMD1_0589	protein of unknown function	588731	588928	198	-1	20	19	19	-0.0403	0.94	18	23	21	0.21	0.62	22	17	20	-0.15	0.56	AMD1_0589	18.3333	33.6667	55	101
AMD1_0590	protein of unknown function	588881	589741	861	2	3147	3315	3231	0.0719	0.64	2939	2995	2967	0.0267	0.88	2904	3028	2966	0.0535	0.75	AMD1_0590	3226.33	79.6667	9679	239
AMD1_0591	conserved protein of unknown function	589870	590088	219	-2	211	172	192	-0.27	0.2	197	191	194	-0.0417	0.87	185	158	171	-0.19	0.34	AMD1_0591	167.667	157.333	503	472
AMD1_0592	conserved protein of unknown function	590215	590973	759	-2	502	452	477	-0.14	0.4	468	380	424	-0.29	0.1	368	413	391	0.14	0.44	AMD1_0592	440.333	87.3333	1321	262
AMD1_0593	protein of unknown function	591019	591633	615	1	621	545	583	-0.18	0.24	580	321	451	-0.83	1.47e-08	311	498	404	0.64	2.11e-05	AMD1_0593	530.667	124	1592	372
AMD1_0594	protein of unknown function	591637	592104	468	1	499	450	474	-0.14	0.42	466	248	357	-0.88	4.36e-08	240	411	326	0.73	7.46e-06	AMD1_0594	438.333	428.333	1315	1285
AMD1_0595	conserved protein of unknown function	592425	593765	1341	3	301	274	288	-0.13	0.56	282	224	253	-0.31	0.0877	217	250	234	0.17	0.38	AMD1_0595	267.333	134	802	402
AMD1_0596	protein of unknown function	594427	594759	333	1	37	39	38	0.0525	0.9	35	39	37	0.13	0.72	38	36	37	-0.0438	0.88	AMD1_0596	38	52.6667	114	158
AMD1_0597	protein of unknown function	594817	597063	2247	1	92	76	84	-0.25	0.4	86	96	91	0.12	0.69	93	69	81	-0.31	0.16	AMD1_0597	73.6667	335	221	1005
AMD1_0598	conserved protein of unknown function	597134	597484	351	2	61	55	58	-0.12	0.75	57	63	60	0.13	0.7	61	51	56	-0.18	0.47	AMD1_0598	53.6667	5	161	15
AMD1_0599	protein of unknown function	597683	597898	216	2	-	-			-	7.96	9.33	8.65	0.13	0.78	9.05	11	9.96	0.0618	0.8	AMD1_0599	11.6667	163.667	35	491
AMD1_0600	HTH_17 domain-containing protein	597856	598149	294	-2	159	135	147	-0.22	0.36	149	153	151	0.0263	0.93	148	123	135	-0.2	0.34	AMD1_0600	131	26.3333	393	79
AMD1_0601	protein of unknown function	598327	598503	177	1	206	213	209	0.0402	0.88	192	189	191	-0.0205	0.94	183	194	189	0.059	0.81	AMD1_0601	206.667	10.3333	620	31
AMD1_0602	protein of unknown function	598494	598733	240	3	268	344	306	0.32	0.22	250	249	250	-0.00476	0.99	241	314	278	0.3	0.14	AMD1_0602	335	15	1005	45
AMD1_0603	protein of unknown function	598825	599136	312	1	83	86	84	0.0426	0.89	77	84	80	0.1	0.73	81	78	80	-0.0402	0.88	AMD1_0603	83.6667	61	251	183
AMD1_0604	protein of unknown function	599749	600210	462	1	163	196	179	0.24	0.24	152	155	154	0.0156	0.96	150	179	164	0.2	0.32	AMD1_0604	190.333	63.3333	571	190
AMD1_0605	conserved protein of unknown function	600210	600941	732	3	153	168	161	0.12	0.67	143	128	136	-0.15	0.54	124	153	139	0.24	0.25	AMD1_0605	163.333	160.667	490	482
AMD1_0606	PPM-type phosphatase domain-containing protein	601040	601852	813	-1	2214	2188	2201	-0.017	0.92	2068	1723	1896	-0.25	0.11	1672	1998	1835	0.23	0.12	AMD1_0606	2131.33	75.6667	6394	227
AMD1_0607	conserved protein of unknown function	601845	603353	1509	-3	3531	3317	3424	-0.088	0.5	3297	2764	3030	-0.24	0.11	2681	3029	2855	0.16	0.31	AMD1_0607	3233.33	122.333	9700	367
AMD1_0608	protein of unknown function	602622	602831	210	3	-	-			-	12	12	12	-0.0161	0.98	11	9.4	10	-0.0538	0.81	AMD1_0608	10	427	30	1281
AMD1_0609	protein of unknown function	603156	603344	189	3	33	56	44	0.67	0.0253	31	43	37	0.39	0.24	42	51	46	0.2	0.42	AMD1_0609	55	412	165	1236
AMD1_0610	Putative Serine/threonine protein kinase	603350	606829	3480	-1	6511	6328	6420	-0.0398	0.79	6080	5215	5648	-0.21	0.19	5058	5780	5419	0.17	0.27	AMD1_0610	6170.33	559	18511	1677
AMD1_0611	protein of unknown function	606864	607082	219	-3	322	391	357	0.26	0.15	301	293	297	-0.0332	0.89	284	357	321	0.28	0.1	AMD1_0611	380.667	214.333	1142	643
AMD1_0612	protein of unknown function	607127	607636	510	-1	3552	4065	3808	0.19	0.0952	3316	2800	3058	-0.23	0.19	2716	3713	3214	0.41	0.0069	AMD1_0612	3960.67	74.6667	11882	224
AMD1_0613	conserved protein of unknown function	607633	608760	1128	-2	5830	6025	5928	0.0436	0.83	5444	4698	5071	-0.2	0.17	4556	5503	5030	0.24	0.11	AMD1_0613	5859.67	283.333	17579	850
AMD1_0614	Succinoglycan biosynthesis protein exoi	608880	609722	843	-3	786	726	756	-0.1	0.68	734	402	568	-0.83	2.05e-05	390	663	526	0.71	0.000138	AMD1_0614	705	23	2115	69
AMD1_0615	conserved exported protein of unknown function	609873	610358	486	3	393	440	417	0.15	0.38	367	304	335	-0.26	0.17	295	402	348	0.4	0.0147	AMD1_0615	428.667	21	1286	63
AMD1_0616	protein of unknown function	610487	610816	330	-1	114	93	103	-0.26	0.32	106	98	102	-0.11	0.69	95	85	90	-0.11	0.64	AMD1_0616	90	48.3333	270	145
AMD1_0617	conserved protein of unknown function	610885	611691	807	-2	895	955	925	0.0884	0.6	836	693	765	-0.26	0.0881	672	872	772	0.35	0.00992	AMD1_0617	930.667	194.333	2792	583
AMD1_0618	conserved protein of unknown function	611982	612230	249	3	44	44	44	0.0131	0.98	41	57	49	0.4	0.19	55	41	48	-0.29	0.24	AMD1_0618	43.3333	3.33333	130	10
AMD1_0619	conserved protein of unknown function	612227	612619	393	2	66	64	65	-0.0481	0.9	62	76	69	0.25	0.39	74	58	66	-0.24	0.31	AMD1_0619	62	7.66667	186	23
AMD1_0620	conserved protein of unknown function	612734	613348	615	2	843	894	869	0.0797	0.68	787	654	720	-0.26	0.1	634	817	725	0.33	0.019	AMD1_0620	870.333	15.6667	2611	47
AMD1_0621	DNA-binding protein	613589	613831	243	-1	825	1106	965	0.4	0.00517	770	869	820	0.17	0.32	843	1010	926	0.23	0.11	AMD1_0621	1075.33	19	3226	57
AMD1_0622	protein of unknown function	613817	613948	132	2	-	-			-	8.68	9.09	8.88	0.0257	0.96	8.8	7.62	8.21	-0.039	0.86	AMD1_0622	8	728.333	24	2185
AMD1_0623	conserved protein of unknown function	613979	614662	684	2	96	66	81	-0.47	0.0652	90	80	85	-0.16	0.58	77	60	69	-0.25	0.29	AMD1_0623	64.6667	295.667	194	887
AMD1_0624	conserved protein of unknown function	614942	615172	231	2	30	24	27	-0.23	0.57	28	24	26	-0.15	0.72	23	22	22	-0.0514	0.86	AMD1_0624	23	12	69	36
AMD1_0625	Resolvase domain	615189	616886	1698	3	77	79	78	0.0419	0.9	71	63	67	-0.16	0.6	61	72	67	0.16	0.49	AMD1_0625	77.3333	142.667	232	428
AMD1_0635	protein of unknown function	622941	623168	228	3	-	-			-	10	9.04	9.55	-0.089	0.86	8.75	9.09	8.92	0.0154	0.95	AMD1_0635	9.66667	53.6667	29	161
AMD1_0636	putative 5-oxoprolinase	623207	627079	3873	-1	1123	1211	1167	0.1	0.56	1048	869	959	-0.26	0.075	843	1106	975	0.36	0.0102	AMD1_0636	1180.67	221.667	3542	665
AMD1_0637	Anaerobic benzoate catabolism transcriptional regulator	627201	627782	582	-3	312	317	314	0.0251	0.92	291	219	255	-0.38	0.0576	212	289	251	0.39	0.0269	AMD1_0637	308.667	6.66667	926	20
AMD1_0638	protein of unknown function	627709	627897	189	-2	117	108	113	-0.0926	0.78	109	105	107	-0.0481	0.88	102	99	100	-0.0291	0.92	AMD1_0638	105	3.33333	315	10
AMD1_0639	2-amino-3-ketobutyrate CoA ligase	627935	629137	1203	2	35	38	37	0.0997	0.8	33	103	68	1.55	1.41e-06	100	35	67	-1.37	1.48e-05	AMD1_0639	37.6667	21.6667	113	65
AMD1_0640	threonine dehydrogenase	629155	630177	1023	1	37	49	43	0.32	0.36	34	145	90	1.98	5.65e-10	140	45	92	-1.55	8.41e-08	AMD1_0640	47.6667	18	143	54
AMD1_0641	Xylose isomerase-like TIM barrel	630340	631428	1089	-2	147	190	169	0.34	0.0748	138	146	142	0.0845	0.78	142	173	157	0.22	0.32	AMD1_0641	185.333	39.3333	556	118
AMD1_0642	Oligopeptide transport ATP-binding protein OppF	631449	632267	819	-3	70	85	78	0.24	0.4	66	74	70	0.16	0.6	72	77	75	0.0664	0.8	AMD1_0642	83	14.6667	249	44
AMD1_0643	dipeptide ABC transporter ATP binding subunit DppD	632270	633286	1017	-1	40	66	53	0.61	0.0363	38	57	47	0.49	0.14	55	60	58	0.0665	0.81	AMD1_0643	64.3333	8.66667	193	26
AMD1_0644	putative D,D-dipeptide ABC transporter membrane subunit DdpC	633288	634142	855	-3	37	72	55	0.86	0.00332	35	52	43	0.47	0.21	51	66	58	0.18	0.47	AMD1_0644	71	9.66667	213	29
AMD1_0645	Dipeptide transport system permease protein DppB	634139	635182	1044	-1	126	211	169	0.7	0.000882	118	144	131	0.27	0.27	140	193	166	0.37	0.0695	AMD1_0645	207	35	621	105
AMD1_0646	Putative D,D-dipeptide-binding periplasmic protein DdpA	635195	636772	1578	-1	223	315	269	0.43	0.0906	209	225	217	0.1	0.68	218	287	253	0.3	0.17	AMD1_0646	309	50.3333	927	151
AMD1_0647	Hydantoin racemase	637260	638027	768	3	13	17	15	0.28	0.52	12	19	15	0.45	0.28	18	16	17	-0.073	0.79	AMD1_0647	17	90.3333	51	271
AMD1_0648	HTH gntR-type domain-containing protein	638374	639084	711	1	507	638	572	0.32	0.0207	473	499	486	0.0712	0.71	483	583	533	0.24	0.11	AMD1_0648	623.333	10.6667	1870	32
AMD1_0649	Chitooligosaccharide deacetylase	639286	640692	1407	-2	79	79		-0.00215	1	74	87	80	0.2	0.5	84	72	78	-0.16	0.5	AMD1_0649	77.3333	64	232	192
AMD1_0650	Hydroxypyruvate isomerase	640822	641754	933	-2	29	35	32	0.19	0.61	27	28	28	0.0322	0.94	27	32	30	0.12	0.66	AMD1_0650	34	41.3333	102	124
AMD1_0651	malate synthase G	641942	644119	2178	2	63	69	66	0.12	0.73	59	87	73	0.5	0.0814	84	63	74	-0.29	0.23	AMD1_0651	67.3333	73	202	219
AMD1_0652	Glyoxalase family protein	644255	645808	1554	2	536	622	579	0.21	0.18	501	445	473	-0.16	0.39	431	568	500	0.36	0.017	AMD1_0652	606.333	99	1819	297
AMD1_0653	Ferredoxin-6	645830	646150	321	-1	103	101	102	-0.0282	0.94	97	60	78	-0.64	0.0139	58	92	75	0.52	0.045	AMD1_0653	99	43	297	129
AMD1_0654	Biotin biosynthesis cytochrome P450	646166	647419	1254	-1	285	271	278	-0.0661	0.78	266	191	229	-0.45	0.0198	185	248	216	0.36	0.0453	AMD1_0654	264.667	52.3333	794	157
AMD1_0655	Arabinose operon regulatory protein	647592	648437	846	3	103	116	109	0.15	0.58	96	87	92	-0.13	0.63	84	106	95	0.25	0.24	AMD1_0655	112.667	37.3333	338	112
AMD1_0656	N(G),N(G)-dimethylarginine dimethylaminohydrolase	648543	649346	804	3	303	334	319	0.13	0.49	283	227	255	-0.3	0.15	220	305	262	0.41	0.0226	AMD1_0656	325.667	25.6667	977	77
AMD1_0657	protein of unknown function	649428	649898	471	-3	-	-			-	9.07	8.12	8.59	-0.0963	0.85	7.87	11	9.61	0.13	0.55	AMD1_0657	12	1168	36	3504
AMD1_0658	Outer membrane cobalamin translocator	649919	651781	1863	2	79	90	85	0.15	0.61	74	101	88	0.4	0.12	98	82	90	-0.19	0.41	AMD1_0658	87.6667	176	263	528
AMD1_0659	Corrinoid ABC transporter substrate-binding protein	651793	652641	849	1	32	30	31	-0.0524	0.91	29	33	31	0.14	0.73	32	27	30	-0.13	0.62	AMD1_0659	29	10	87	30
AMD1_0660	Uncharacterized ABC transporter permease protein YvrB	652638	653639	1002	3	27	40	34	0.43	0.23	26	44	35	0.64	0.0652	43	36	40	-0.11	0.69	AMD1_0660	39	8.33333	117	25
AMD1_0661	ferric citrate ABC transporter ATP binding subunit	653639	654427	789	2	35	36	36	0.0192	0.97	33	38	36	0.16	0.66	37	33	35	-0.094	0.73	AMD1_0661	35	3	105	9
AMD1_0662	conserved protein of unknown function	654424	655455	1032	1	42	48	45	0.13	0.75	39	44	42	0.11	0.78	43	44	43	0.0251	0.93	AMD1_0662	47	39	141	117
AMD1_0663	Biopolymer transport protein ExbB	655676	656794	1119	2	89	119	104	0.36	0.12	84	127	105	0.55	0.0186	123	109	116	-0.14	0.54	AMD1_0663	116	10.6667	348	32
AMD1_0664	Ton complex subunit ExbD	656805	657266	462	3	63	71	67	0.15	0.63	59	81	70	0.42	0.13	79	65	72	-0.2	0.4	AMD1_0664	69.3333	7	208	21
AMD1_0665	Ferric siderophore transport system, periplasmic binding protein TonB	657263	658171	909	2	158	187	172	0.22	0.28	147	174	161	0.23	0.3	169	171	170	0.0057	0.98	AMD1_0665	182	56.6667	546	170
AMD1_0666	Putative RNA polymerase sigma factor FecI	658556	659059	504	2	75	111	93	0.51	0.0303	70	151	110	1.05	1.52e-06	146	102	124	-0.44	0.0299	AMD1_0666	108.667	17	326	51
AMD1_0667	Fec operon regulator FecR	659084	660136	1053	2	627	614	620	-0.0292	0.89	586	688	637	0.21	0.34	668	561	614	-0.2	0.31	AMD1_0667	597.667	12	1793	36
AMD1_0668	Brucella heme uptake protein A	660265	662568	2304	1	102	101	101	-0.0129	0.97	95	104	99	0.11	0.75	101	92	96	-0.0807	0.76	AMD1_0668	98.3333	113	295	339
AMD1_0669	protein of unknown function	662510	663019	510	-1	91	83	87	-0.11	0.72	85	58	71	-0.5	0.0677	56	76	66	0.31	0.2	AMD1_0669	81	23	243	69
AMD1_0670	conserved protein of unknown function	662636	662920	285	2	-	-			-	11	12	11	0.0777	0.87	11	10	11	-0.036	0.89	AMD1_0670	11	79	33	237
AMD1_0671	N(2)-citryl-N(6)-acetyl-N(6)-hydroxylysine synthase	663009	664790	1782	3	26	18	22	-0.36	0.36	24	30	27	0.22	0.59	30	17	23	-0.43	0.14	AMD1_0671	17.6667	29.6667	53	89
AMD1_0672	Aerobactin synthase	664774	666486	1713	1	15	14	14	-0.00835	0.99	14	18	16	0.24	0.59	18	13	15	-0.12	0.63	AMD1_0672	14	22.3333	42	67
AMD1_0673	Long-chain-fatty-acid--CoA ligase	666497	667768	1272	2	12	14	13	0.12	0.8	11	12	11	0.0509	0.92	12	12	12	0.0363	0.88	AMD1_0673	13.3333	126.333	40	379
AMD1_0674	Acyl carrier protein	667765	669066	1302	1	22	27	25	0.2	0.64	21	33	27	0.53	0.15	32	25	29	-0.2	0.44	AMD1_0674	26.6667	49.3333	80	148
AMD1_0675	3-dehydroshikimate dehydratase	669063	669908	846	3	-	-			-	9.03	13	11	0.25	0.59	12	8.84	10	-0.11	0.62	AMD1_0675	9.33333	11.3333	28	34
AMD1_0676	Putative ABC transporter solute-binding protein YclQ	669981	670886	906	3	72	83	77	0.18	0.57	67	93	80	0.43	0.1	91	75	83	-0.18	0.43	AMD1_0676	80.6667	11.6667	242	35
AMD1_0677	Petrobactin import system permease protein YclN	670886	671851	966	2	65	71	68	0.12	0.72	61	71	66	0.17	0.62	68	65	67	-0.0349	0.9	AMD1_0677	69.3333	34.3333	208	103
AMD1_0678	Iron(III) dicitrate transport system permease protein FecD	671844	672785	942	3	39	43	41	0.11	0.79	36	51	43	0.38	0.27	49	39	44	-0.18	0.49	AMD1_0678	41.6667	26.3333	125	79
AMD1_0679	Petrobactin import ATP-binding protein YclP	672782	673540	759	2	22	24	23	0.1	0.83	20	39	30	0.73	0.0645	38	22	30	-0.49	0.0902	AMD1_0679	23.6667	13.3333	71	40
AMD1_0680	Benzaldehyde dehydrogenase [NAD(+)]	673605	675086	1482	-3	60	128	94	1.03	9.44e-06	56	373	214	2.71	1.92e-40	361	117	239	-1.59	6.47e-15	AMD1_0680	124.333	12.6667	373	38
AMD1_0681	Beta-ketoadipate enol-lactone hydrolase	675091	675930	840	-2	19	29	24	0.46	0.21	18	78	48	2.03	3.66e-10	75	27	51	-1.38	4.57e-06	AMD1_0681	28.6667	17.3333	86	52
AMD1_0682	High-affinity branched-chain amino acid transport ATP-binding protein BraG	675941	676654	714	-1	8.81	18	13	0.7	0.13	8.23	11	9.79	0.18	0.69	11	16	14	0.13	0.53	AMD1_0682	17.6667	8	53	24
AMD1_0683	High-affinity branched-chain amino acid transport ATP-binding protein LivG	676651	677409	759	-2	-	-			-	11	8.31	9.69	-0.23	0.62	8.06	9.33	8.69	0.0573	0.81	AMD1_0683	10	22	30	66
AMD1_0684	Benzoate transport, inner-membrane translocator precursor	677399	678400	1002	-1	-	-			-	7.21	8.07	7.64	0.0424	0.93						AMD1_0684	8	15.3333	24	46
AMD1_0685	Benzoate transport, inner-membrane translocator	678402	679274	873	-3	9.38	16	12	0.4	0.37	8.76	13	11	0.27	0.55	13	14	13	0.0547	0.82	AMD1_0685	15.3333	31.3333	46	94
AMD1_0686	Benzoate transport, extracellular ligand-binding receptor	679325	680539	1215	-1	15	15	15	0.0254	0.96	14	12	13	-0.13	0.8	11	14	12	0.0728	0.75	AMD1_0686	14.6667	47.6667	44	143
AMD1_0687	4-hydroxybenzoate transporter	680662	682002	1341	-2	17	36	26	0.91	0.0284	16	28	22	0.46	0.3	27	33	30	0.0383	0.83	AMD1_0687	35.6667	22.3333	107	67
AMD1_0688	1,6-dihydroxycyclohexa-2,4-diene-1-carboxylate dehydrogenase	682097	682885	789	-1																AMD1_0688	6	14.3333	18	43
AMD1_0689	Ferredoxin / Ferredoxin--NAD(+) reductase	682882	683901	1020	-2	14	13	13	-0.0699	0.89	13	15	14	0.11	0.81	15	12	13	-0.0875	0.72	AMD1_0689	12.6667	81.6667	38	245
AMD1_0690	2-halobenzoate 1,2-dioxygenase small subunit	683924	684415	492	-1	-	-			-	6.6	14	10	0.54	0.24						AMD1_0690	14.6667	41.6667	44	125
AMD1_0691	Benzoate 1,2-dioxygenase subunit alpha	684505	685875	1371	-2	113	118	116	0.0519	0.86	106	103	105	-0.0301	0.92	100	108	104	0.0756	0.75	AMD1_0691	115	86.3333	345	259
AMD1_0692	Catechol 1,2-dioxygenase 2	685933	686859	927	-2	31	45	38	0.44	0.22	29	21	25	-0.37	0.34	20	41	31	0.81	0.017	AMD1_0692	44	21.3333	132	64
AMD1_0693	Muconolactone Delta-isomerase 2	686955	687245	291	-3	23	23	23	-0.00671	0.99	21	22	21	0.0207	0.97	21	21	21	-0.0095	0.98	AMD1_0693	22	2.33333	66	7
AMD1_0694	Muconate cycloisomerase 1-1	687250	688404	1155	-2	47	49	48	0.0573	0.88	43	42	43	-0.0544	0.9	41	45	43	0.0777	0.78	AMD1_0694	47.6667	19	143	57
AMD1_0695	putative cat1 operon transcriptional activator	688505	689428	924	2	241	274	258	0.17	0.54	225	214	220	-0.0655	0.82	208	250	229	0.21	0.32	AMD1_0695	268.333	30.6667	805	92
AMD1_0696	Transcriptional regulator, ArsR family	689561	689905	345	2	115	118	116	0.0284	0.93	108	117	112	0.11	0.72	114	107	111	-0.0539	0.83	AMD1_0696	115	38.6667	345	116
AMD1_0697	Arsenical-resistance protein Acr3	689909	690970	1062	2	202	235	218	0.2	0.38	188	226	207	0.24	0.22	219	215	217	-0.0215	0.93	AMD1_0697	230.333	43.3333	691	130
AMD1_0698	arsenate reductase	690967	691380	414	1	94	110	102	0.21	0.41	87	121	104	0.44	0.0605	118	101	109	-0.17	0.43	AMD1_0698	107.667	22.3333	323	67
AMD1_0699	NADPH-dependent FMN reductase ArsH	691383	692087	705	3	136	164	150	0.25	0.27	127	168	148	0.38	0.0609	163	150	156	-0.0972	0.66	AMD1_0699	160.333	20.6667	481	62
AMD1_0700	Major Facilitator Superfamily protein	692084	693274	1191	2	79	98	89	0.28	0.28	74	110	92	0.51	0.0251	106	90	98	-0.18	0.42	AMD1_0700	96	99.3333	288	298
AMD1_0701	conserved protein of unknown function	693607	693999	393	-2	20600	15000	17800	-0.43	0.0043	19200	19500	19400	0.0214	0.93	18900	13700	16300	-0.42	0.0116	AMD1_0701	14626.3	53.3333	43879	160
AMD1_0702	3-phosphoshikimate 1-carboxyvinyltransferase	694175	695527	1353	2	2094	2186	2140	0.0583	0.77	1955	2278	2117	0.21	0.16	2210	1996	2103	-0.13	0.47	AMD1_0702	2125.33	101.333	6376	304
AMD1_0703	3-oxoacyl-[acyl-carrier-protein] reductase FabG	695557	696258	702	1	927	982	955	0.0795	0.65	866	955	910	0.14	0.43	926	897	911	-0.0414	0.82	AMD1_0703	956.667	65.3333	2870	196
AMD1_0704	Cytidylate kinase	696278	696916	639	2	1639	2356	1997	0.5	0.00046	1531	2015	1773	0.38	0.00843	1954	2151	2053	0.12	0.44	AMD1_0704	2303	46.3333	6909	139
AMD1_0705	30S ribosomal subunit protein S1	697088	698785	1698	2	12100	19000	15600	0.62	0.000301	11300	18300	14800	0.66	0.000765	17800	17400	17600	-0.0263	0.91	AMD1_0705	18598.3	233	55795	699
AMD1_0706	Alpha/beta hydrolase family protein	699028	700167	1140	1	806	977	892	0.27	0.0598	753	919	836	0.28	0.074	891	893	892	0.00155	0.99	AMD1_0706	952.333	206	2857	618
AMD1_0707	3-oxoacyl-[acyl-carrier-protein] reductase FabG	700216	700923	708	-2	443	508	475	0.19	0.26	413	374	394	-0.13	0.53	363	464	414	0.31	0.0584	AMD1_0707	495.333	53.3333	1486	160
AMD1_0708	putative 2-ketoarginine decarboxylase AruI	700957	702531	1575	-2	623	648	635	0.0543	0.79	582	531	557	-0.12	0.51	515	591	553	0.18	0.25	AMD1_0708	632	18	1896	54
AMD1_0709	HTH-type transcriptional repressor KstR2	702528	703178	651	-3	412	369	391	-0.15	0.48	385	337	361	-0.18	0.43	327	337	332	0.0375	0.87	AMD1_0709	360.333	3.33333	1081	10
AMD1_0710	lysine/arginine/ornithine ABC transporter/histidine ABC transporter, ATP binding subunit	703415	704227	813	2	365	300	332	-0.26	0.14	341	179	260	-0.9	3.15e-06	173	274	224	0.6	0.00137	AMD1_0710	292.667	21.3333	878	64
AMD1_0711	Lysine-arginine-ornithine-binding periplasmic protein	704279	705058	780	2	965	528	747	-0.84	2.96e-09	901	291	596	-1.61	2.91e-21	282	482	382	0.73	4.1e-06	AMD1_0711	515.667	159.667	1547	479
AMD1_0712	Histidine transport system permease protein HisQ	705280	706023	744	1	55	41	48	-0.37	0.25	52	35	43	-0.49	0.13	34	37	35	0.0702	0.8	AMD1_0712	39.6667	271	119	813
AMD1_0713	Octopine transport system permease protein OccM	706020	706829	810	3	85	65	75	-0.32	0.24	79	30	55	-1.32	6.14e-06	29	60	44	0.89	0.00215	AMD1_0713	63.6667	59	191	177
AMD1_0714	(2R)-3-sulfolactate dehydrogenase (NADP(+))	706834	707859	1026	1	240	231	236	-0.0499	0.85	224	127	176	-0.78	9.08e-05	123	211	167	0.71	0.000385	AMD1_0714	225.667	26.3333	677	79
AMD1_0715	conserved exported protein of unknown function	708197	708586	390	2	43	24	33	-0.69	0.0492	40	27	34	-0.45	0.22	26	22	24	-0.092	0.73	AMD1_0715	23.3333	10.3333	70	31
AMD1_0716	putative stress response protein	708754	708951	198	-2	718	229	473	-1.58	3.68e-09	670	237	453	-1.42	2.37e-07	230	209	219	-0.1	0.66	AMD1_0716	223.333	5	670	15
AMD1_0717	DoxX	709160	709612	453	2	75	57	66	-0.33	0.31	70	229	150	1.61	1.66e-07	222	52	137	-2.02	4.92e-12	AMD1_0717	55.6667	11.3333	167	34
AMD1_0718	dTDP-4-dehydrorhamnose reductase	709752	710726	975	3	1919	2236	2078	0.21	0.16	1792	2745	2268	0.6	1.23e-05	2662	2042	2352	-0.35	0.00872	AMD1_0718	2183	162.333	6549	487
AMD1_0719	Undecaprenyl-diphosphatase 1	710840	711646	807	-1	468	458	463	-0.0298	0.89	437	682	559	0.62	1.12e-05	661	418	540	-0.62	8.13e-06	AMD1_0719	446.667	179.667	1340	539
AMD1_0720	FtsZ-localized protein A	711808	712500	693	1	781	878	830	0.16	0.25	730	1038	884	0.49	0.000259	1006	802	904	-0.3	0.029	AMD1_0720	855	53	2565	159
AMD1_0721	Epoxyqueuosine reductase	712481	713644	1164	2	375	464	420	0.29	0.039	350	563	456	0.66	1.03e-05	546	424	485	-0.33	0.0309	AMD1_0721	452.667	34.3333	1358	103
AMD1_0722	NAD dependent epimerase/dehydratase family protein	713641	714555	915	1	992	963	977	-0.0412	0.84	926	1243	1085	0.41	0.00699	1206	880	1043	-0.42	0.00196	AMD1_0722	939	48.3333	2817	145
AMD1_0723	Penicillin-insensitive murein endopeptidase	714654	715754	1101	3	1842	1894	1868	0.0385	0.81	1720	1537	1629	-0.16	0.29	1491	1730	1610	0.2	0.14	AMD1_0723	1846.33	34.6667	5539	104
AMD1_0724	Methylglyoxal synthase	715859	716242	384	2	1457	833	1145	-0.79	4.91e-15	1361	803	1082	-0.74	1.04e-08	779	761	770	-0.0312	0.88	AMD1_0724	811.333	26.6667	2434	80
AMD1_0725	Glucokinase	716269	717291	1023	1	1653	1063	1358	-0.62	9.73e-08	1544	1002	1273	-0.61	1.88e-05						AMD1_0725	1037.33	13.3333	3112	40
AMD1_0726	Uncharacterized ABC transporter ATP-binding protein y4gM	717373	719229	1857	1	1769	1813	1791	0.0336	0.87	1652	2154	1903	0.37	0.0134	2089	1656	1873	-0.3	0.0275	AMD1_0726	1765	92.3333	5295	277
AMD1_0727	4-hydroxy-tetrahydrodipicolinate reductase	719226	720035	810	3	831	829	830	-0.00224	0.99	776	941	859	0.27	0.14	913	758	835	-0.23	0.16	AMD1_0727	808.333	26.6667	2425	80
AMD1_0728	2,3-bisphosphoglycerate-dependent phosphoglycerate mutase	720074	720691	618	2	1067	1141	1104	0.0912	0.65	996	1319	1158	0.39	0.0122	1279	1042	1160	-0.27	0.0462	AMD1_0728	1113	17.3333	3339	52
AMD1_0729	Uncharacterized glycosyltransferase YkcC	721259	722287	1029	2	165	174	169	0.0757	0.77	154	148	151	-0.0462	0.86	144	159	151	0.11	0.6	AMD1_0729	169.667	222.667	509	668
AMD1_0730	GtrA-like protein	722335	724269	1935	1	619	583	601	-0.0836	0.66	578	533	555	-0.11	0.6	517	532	525	0.0348	0.87	AMD1_0730	568	338.667	1704	1016
AMD1_0731	conserved exported protein of unknown function	724472	724960	489	2	88	87		-0.000417	1	82	61	72	-0.36	0.23	59	80	70	0.28	0.25	AMD1_0731	85.6667	70	257	210
AMD1_0732	conserved membrane protein of unknown function	725077	725451	375	-2	3540	2092	2816	-0.72	4.99e-05	3304	4283	3794	0.33	0.23	4154	1911	3033	-1.04	5.28e-06	AMD1_0732	2035.67	36	6107	108
AMD1_0733	Mycofactocin system glycosyltransferase	725627	726601	975	-1	85	73	79	-0.19	0.54	79	78	79	-0.0209	0.95	76	67	71	-0.13	0.59	AMD1_0733	71	21	213	63
AMD1_0734	protein of unknown function	725972	726514	543	2																AMD1_0734	4	6.66667	12	20
AMD1_0735	conserved protein of unknown function	726778	728664	1887	1	70	70		0.00214	1	65	55	60	-0.22	0.5	53	64	59	0.18	0.46	AMD1_0735	68.6667	140.667	206	422
AMD1_0736	protein of unknown function	728720	728953	234	2																AMD1_0736	4.66667	41.3333	14	124
AMD1_0737	Endolytic peptidoglycan transglycosylase RlpA	729064	729420	357	1	378	194	286	-0.9	0.000205	353	274	313	-0.32	0.24	265	177	221	-0.51	0.00761	AMD1_0737	189	38.6667	567	116
AMD1_0738	D-alanyl-alanine synthetase A	729454	730509	1056	-2	451	396	423	-0.18	0.29	421	323	372	-0.36	0.0432	313	362	338	0.17	0.34	AMD1_0738	386.333	65	1159	195
AMD1_0739	Putative sugar lactone lactonase	730646	731515	870	-1	1152	1005	1078	-0.18	0.39	1076	785	931	-0.44	0.00143	762	917	840	0.23	0.2	AMD1_0739	983.333	17.3333	2950	52
AMD1_0740	2-dehydro-3-deoxy-6-phosphogalactonate aldolase	731517	732152	636	-3	1062	944	1003	-0.16	0.38	992	702	847	-0.48	0.00291	681	862	771	0.3	0.0721	AMD1_0740	921.667	14.6667	2765	44
AMD1_0741	putative 2-dehydro-3-deoxygalactonokinase DgoK1	732149	733090	942	-1	1470	1267	1368	-0.21	0.16	1373	988	1181	-0.46	0.000796	958	1157	1058	0.24	0.11	AMD1_0741	1236.33	14.6667	3709	44
AMD1_0742	putative galactose dehydrogenase GalD	733087	733851	765	-2	1541	1184	1362	-0.37	0.00236	1439	1013	1226	-0.49	0.000925	982	1081	1032	0.12	0.5	AMD1_0742	1156	15.3333	3468	46
AMD1_0743	protein of unknown function	733829	734020	192	-1	233	211	222	-0.13	0.6	217	193	205	-0.15	0.57	187	193	190	0.031	0.91	AMD1_0743	206	79.3333	618	238
AMD1_0744	Bacteriophytochrome cph2	734096	735439	1344	-1	1382	1247	1314	-0.14	0.36	1290	803	1046	-0.67	1.52e-06	778	1139	959	0.51	0.0005	AMD1_0744	1213.33	96.6667	3640	290
AMD1_0745	Glutathione synthetase	735734	736675	942	2	1445	1427	1436	-0.0167	0.95	1349	1356	1353	0.00827	0.97	1316	1303	1309	-0.0125	0.96	AMD1_0745	1396.33	60.3333	4189	181
AMD1_0746	Chloramphenicol resistance protein	736697	737881	1185	-1	156	165	160	0.0743	0.78	145	243	194	0.7	0.000285	236	151	193	-0.57	0.00347	AMD1_0746	160.333	237.333	481	712
AMD1_0747	Cyclic di-GMP phosphodiesterase Gmr	738118	739179	1062	-2	1665	1132	1398	-0.54	4.32e-05	1555	887	1221	-0.78	5.53e-06	860	1034	947	0.22	0.21	AMD1_0747	1101	22.6667	3303	68
AMD1_0748	transposase	739383	740348	966	3	386	451	419	0.21	0.23	361	346	354	-0.0563	0.8	336	412	374	0.26	0.11	AMD1_0748	440	115	1320	345
AMD1_0749	protein of unknown function	740385	740591	207	3	260	272	266	0.0592	0.8	243	313	278	0.34	0.11	304	249	276	-0.23	0.23	AMD1_0749	264.667	242.333	794	727
AMD1_0750	protein of unknown function	740574	740774	201	-3	643	420	532	-0.57	0.00268	600	619	609	0.0378	0.9	600	384	492	-0.55	0.00934	AMD1_0750	409	186	1227	558
AMD1_0751	protein of unknown function	740928	741740	813	3	1893	2124	2009	0.16	0.23	1768	1537	1652	-0.19	0.28	1491	1940	1715	0.34	0.0202	AMD1_0751	2072.67	43.6667	6218	131
AMD1_0752	protein of unknown function	741706	741876	171	1	1015	1231	1123	0.27	0.0616	948	901	925	-0.0669	0.79	874	1125	999	0.31	0.0605	AMD1_0752	1201.67	372	3605	1116
AMD1_0753	protein of unknown function	741916	742059	144	-2	5386	6843	6114	0.33	0.0273	5030	7090	6060	0.48	0.000153	6875	6251	6563	-0.12	0.49	AMD1_0753	6647	150	19941	450
AMD1_0754	protein of unknown function	742076	742258	183	2	52	50	51	-0.0345	0.94	48	25	37	-0.81	0.0121	24	46	35	0.63	0.0414	AMD1_0754	48.3333	22321	145	66963
AMD1_0755	protein of unknown function	742526	742738	213	2	45	77	61	0.7	0.00922	42	48	45	0.19	0.63	47	70	58	0.36	0.16	AMD1_0755	74.3333	1397.67	223	4193
AMD1_0756	MG(2+) CHELATASE FAMILY PROTEIN / ComM-related protein	742900	744432	1533	1	100	82	91	-0.26	0.32	93	104	98	0.14	0.62	101	74	87	-0.33	0.13	AMD1_0756	79.3333	69.6667	238	209
AMD1_0757	conserved exported protein of unknown function	744618	745247	630	-3	2610	2913	2762	0.15	0.31	2437	2338	2387	-0.0582	0.74	2267	2662	2464	0.21	0.13	AMD1_0757	2836	23	8508	69
AMD1_0758	Polyhydroxyalkanoate depolymerase, intracellular	745551	746822	1272	-3	2332	2163	2248	-0.0989	0.72	2177	1923	2050	-0.17	0.38	1864	1975	1920	0.0683	0.74	AMD1_0758	2116.33	97.3333	6349	292
AMD1_0759	conserved protein of unknown function	747114	747401	288	-3	1049	1220	1134	0.2	0.36	979	929	954	-0.0724	0.75	901	1115	1008	0.27	0.11	AMD1_0759	1187	10	3561	30
AMD1_0760	Orotidine 5'-phosphate decarboxylase	747422	748120	699	-1	1226	1007	1117	-0.27	0.079	1145	1063	1104	-0.1	0.59	1031	920	976	-0.14	0.44	AMD1_0760	979	32.6667	2937	98
AMD1_0761	FMN-dependent NADPH-azoreductase	748117	748713	597	-2	827	771	799	-0.0968	0.6	772	1033	903	0.4	0.0228	1003	704	853	-0.46	0.00638	AMD1_0761	750	23.3333	2250	70
AMD1_0762	16S ribosomal RNA methyltransferase KsgA/Dim1 family protein	748829	749434	606	-1	5779	5626	5703	-0.0374	0.85	5396	5135	5266	-0.0682	0.73	4981	5137	5059	0.038	0.85	AMD1_0762	5491	39.3333	16473	118
AMD1_0763	chaperone protein DnaJ	749534	750667	1134	-1	3385	3320	3352	-0.0266	0.9	3160	3722	3441	0.22	0.29	3611	3032	3321	-0.2	0.27	AMD1_0763	3246.33	71.3333	9739	214
AMD1_0764	chaperone protein DnaK	750859	752775	1917	-2	12800	13300	13000	0.0455	0.86	11900	17100	14500	0.49	0.00632	16600	12100	14300	-0.38	0.0461	AMD1_0764	12997	159.667	38991	479
AMD1_0765	Protease HtpX-like protein	752991	754103	1113	3	198	192	195	-0.0433	0.89	185	151	168	-0.26	0.32	146	175	161	0.2	0.35	AMD1_0765	187.333	316.667	562	950
AMD1_0766	Spermidine synthase	754769	755467	699	-1	458	485	472	0.0775	0.72	428	496	462	0.2	0.24	481	443	462	-0.0995	0.59	AMD1_0766	471.667	19	1415	57
AMD1_0767	Glucose--fructose oxidoreductase	755558	756544	987	-1	677	705	691	0.0568	0.78	632	534	583	-0.23	0.27	518	644	581	0.27	0.14	AMD1_0767	687	22	2061	66
AMD1_0768	YceI domain-containing protein	756641	757219	579	-1	45	34	40	-0.34	0.31	42	33	38	-0.29	0.41	32	31	31	-0.0275	0.93	AMD1_0768	33	11	99	33
AMD1_0769	Cytochrome b561-like protein 2	757289	757867	579	-1	34	18	26	-0.72	0.0696	32	29	30	-0.11	0.8	28	16	22	-0.35	0.2	AMD1_0769	17.3333	55.3333	52	166
AMD1_0770	Phenylalanine--tRNA ligase beta subunit	757965	760370	2406	-3	1980	2359	2170	0.24	0.044	1850	2454	2152	0.39	0.00504	2380	2154	2267	-0.13	0.39	AMD1_0770	2301.67	70.3333	6905	211
AMD1_0771	ASCH domain protein	760367	760798	432	-1	509	583	546	0.19	0.33	475	569	522	0.25	0.17	552	533	542	-0.0429	0.83	AMD1_0771	570	11.6667	1710	35
AMD1_0772	phenylalanine--tRNA ligase subunit alpha	760795	761880	1086	-2	1305	1633	1469	0.31	0.0188	1219	1655	1437	0.43	0.00217	1605	1491	1548	-0.0923	0.6	AMD1_0772	1596	59.6667	4788	179
AMD1_0773	50S ribosomal subunit protein L20	761995	762396	402	-2	18000	26500	22300	0.54	5.46e-05	16800	30600	23700	0.85	1.6e-09	29700	24200	27000	-0.27	0.0204	AMD1_0773	25905	141.667	77715	425
AMD1_0774	50S ribosomal protein L35	762434	762637	204	-1	14100	14400	14300	0.0299	0.89	13200	15700	14400	0.23	0.25	15200	13200	14200	-0.17	0.4	AMD1_0774	14027	102.333	42081	307
AMD1_0775	putative Cobalt-zinc-cadmium resistance protein CzcN	762848	763474	627	-1	1139	1290	1214	0.17	0.45	1064	1183	1123	0.14	0.51	1147	1178	1163	0.0334	0.85	AMD1_0775	1256.67	113	3770	339
AMD1_0776	Translation initiation factor 3	763678	763917	240	-2	3458	3540	3499	0.0307	0.91	3229	3403	3316	0.0719	0.72	3300	3234	3267	-0.0247	0.91	AMD1_0776	3435	30	10305	90
AMD1_0777	2-hydroxymuconic semialdehyde hydrolase	764415	765188	774	3	441	405	423	-0.12	0.54	412	404	408	-0.0293	0.9	392	370	381	-0.0685	0.73	AMD1_0777	394.333	10.6667	1183	32
AMD1_0778	Inner membrane protein YdcO	765193	766335	1143	1	282	305	294	0.1	0.67	264	270	267	0.0288	0.91	262	278	270	0.0726	0.73	AMD1_0778	296.333	21.3333	889	64
AMD1_0779	conserved protein of unknown function	766453	766893	441	1	2057	1262	1659	-0.62	0.0198	1920	1009	1464	-0.85	0.00189	979	1152	1066	0.0903	0.73	AMD1_0779	1240.67	34.6667	3722	104
AMD1_0780	WLM domain protein	766986	767744	759	3	395	406	400	0.0351	0.88	369	399	384	0.11	0.59	387	371	379	-0.0527	0.79	AMD1_0780	395	110	1185	330
AMD1_0781	N-(5'-phosphoribosyl)anthranilate isomerase	767941	768600	660	1	1120	1138	1129	0.0218	0.91	1046	1293	1170	0.29	0.0956	1255	1039	1147	-0.23	0.16	AMD1_0781	1107.33	32.6667	3322	98
AMD1_0782	tryptophan synthase subunit beta	768630	769850	1221	3	2614	2298	2456	-0.18	0.16	2441	2607	2524	0.0911	0.62	2529	2099	2314	-0.24	0.0934	AMD1_0782	2241.33	83.3333	6724	250
AMD1_0783	Tryptophan synthase alpha chain	769853	770692	840	2	1737	1708	1722	-0.0234	0.91	1622	1892	1757	0.21	0.19	1835	1560	1697	-0.21	0.15	AMD1_0783	1664.67	130.667	4994	392
AMD1_0784	acetyl-CoA carboxyltransferase subunit beta	770729	771652	924	2	2491	2269	2380	-0.13	0.37	2326	2749	2538	0.23	0.16	2666	2072	2369	-0.33	0.0316	AMD1_0784	2215	40.6667	6645	122
AMD1_0785	Dihydrofolate synthase	771690	773021	1332	3	1898	1706	1802	-0.15	0.31	1772	2033	1903	0.19	0.19	1972	1559	1765	-0.31	0.0188	AMD1_0785	1663.67	57.3333	4991	172
AMD1_0786	thioredoxin 1	773090	773410	321	-1	2833	2846	2839	0.00571	0.98	2644	2857	2751	0.11	0.59	2771	2599	2685	-0.0767	0.71	AMD1_0786	2788.33	63.3333	8365	190
AMD1_0787	DNA helicase	773486	777016	3531	-1	942	1106	1024	0.22	0.17	880	928	904	0.0725	0.74	900	1010	955	0.14	0.37	AMD1_0787	1078.33	80.3333	3235	241
AMD1_0788	Double-strand break repair protein AddB	777013	780138	3126	-2	716	846	781	0.23	0.19	669	727	698	0.11	0.67	705	773	739	0.1	0.62	AMD1_0788	823.667	28.6667	2471	86
AMD1_0789	N-acetylmuramate alpha-1-phosphate uridylyltransferase	780135	780869	735	-3	805	940	873	0.21	0.15	752	807	780	0.0975	0.66	783	859	821	0.11	0.57	AMD1_0789	915.667	17	2747	51
AMD1_0790	t(6)A37 threonylcarbamoyladenosine biosynthesis protein TsaE	780866	782377	1512	-1	1029	1177	1103	0.18	0.23	961	1095	1028	0.18	0.33	1062	1075	1069	0.0139	0.95	AMD1_0790	1147.67	152.667	3443	458
AMD1_0791	Histidine kinase	782383	784932	2550	-2	4049	4466	4257	0.14	0.35	3781	3993	3887	0.0752	0.68	3873	4079	3976	0.061	0.69	AMD1_0791	4353.33	138.333	13060	415
AMD1_0792	Adenosylhomocysteinase	785129	786529	1401	-1	4369	5065	4717	0.2	0.21	4081	5613	4847	0.43	0.026	5440	4626	5033	-0.19	0.33	AMD1_0792	4936.67	181.333	14810	544
AMD1_0793	Phosphocarrier protein HPr	786682	786984	303	-2	1320	1675	1497	0.33	0.00569	1233	1555	1394	0.32	0.0163	1508	1530	1519	0.0184	0.92	AMD1_0793	1630.33	25.3333	4891	76
AMD1_0794	PTS fructose transporter subunit IIA	786981	787382	402	-3	2153	2409	2281	0.16	0.23	2011	2209	2110	0.13	0.43	2142	2200	2171	0.0326	0.85	AMD1_0794	2346.33	32.6667	7039	98
AMD1_0795	protein of unknown function	787317	787517	201	3	-	-			-	9.87	6.12	8	-0.36	0.43						AMD1_0795	7.66667	1072	23	3216
AMD1_0796	HPr kinase/phosphorylase	787546	787992	447	-2	292	232	262	-0.3	0.15	272	336	304	0.28	0.14	326	212	269	-0.55	0.00269	AMD1_0796	225.667	23	677	69
AMD1_0797	Sensor protein ChvG	787996	789780	1785	-2	2104	2140	2122	0.0225	0.91	1965	2864	2414	0.53	5.21e-05	2778	1954	2366	-0.48	9.52e-05	AMD1_0797	2086	62.6667	6258	188
AMD1_0798	Transcriptional regulatory protein ChvI	789803	790522	720	-1	2066	1969	2018	-0.0673	0.66	1929	2836	2382	0.54	1.18e-05	2750	1799	2274	-0.59	1.34e-06	AMD1_0798	1920	122.667	5760	368
AMD1_0799	protein of unknown function	790558	790716	159	1	34	45	39	0.34	0.3	32	32	32	0.0151	0.97	31	41	36	0.25	0.34	AMD1_0799	44	197.333	132	592
AMD1_0800	Phosphoenolpyruvate carboxykinase (ATP)	790866	792476	1611	3	136	462	299	1.73	6.53e-22	127	985	556	2.93	2.5e-43	954	422	688	-1.11	3.46e-07	AMD1_0800	453	45	1359	135
AMD1_0801	Peptidyl-tRNA hydrolase ArfB	792564	793001	438	3	221	194	208	-0.17	0.43	206	186	196	-0.14	0.54	181	177	179	-0.0212	0.93	AMD1_0801	189	15.3333	567	46
AMD1_0802	Potassium binding protein Kbp	793082	793597	516	2	7429	8541	7985	0.19	0.41	6940	5401	6171	-0.33	0.13	5239	7801	6520	0.52	0.00162	AMD1_0802	8340	64	25020	192
AMD1_0803	Alpha-ketoglutarate-dependent dioxygenase AlkB homolog	793729	794316	588	1	121	131	126	0.11	0.7	113	124	119	0.12	0.66						AMD1_0803	128.333	63.3333	385	190
AMD1_0804	pantothenate kinase	794376	795338	963	-3	1193	1463	1328	0.28	0.0248	1114	1227	1171	0.13	0.41	1190	1336	1263	0.15	0.33	AMD1_0804	1428.67	135.333	4286	406
AMD1_0805	Phosphoribosyl-ATP pyrophosphatase	795369	795695	327	-3	1537	1618	1578	0.0711	0.67	1435	1640	1538	0.18	0.27	1591	1478	1535	-0.0935	0.58	AMD1_0805	1577.67	21.3333	4733	64
AMD1_0806	imidazole glycerol phosphate synthase subunit HisF	795715	796500	786	-2	1204	1362	1283	0.17	0.24	1124	1393	1258	0.3	0.0639	1351	1244	1298	-0.1	0.57	AMD1_0806	1330.33	33.6667	3991	101
AMD1_0807	1-(5-phosphoribosyl)-5-[(5-phosphoribosylamino)methylideneamino] imidazole-4-carboxamide isomerase	796497	797261	765	-3	1032	1241	1137	0.25	0.0664	964	1284	1124	0.4	0.0138	1246	1134	1190	-0.12	0.49	AMD1_0807	1211.67	33.6667	3635	101
AMD1_0808	Imidazole glycerol phosphate synthase subunit HisH	797258	797908	651	-1	1384	1407	1395	0.0229	0.91	1292	1347	1320	0.0578	0.8	1307	1285	1296	-0.0211	0.92	AMD1_0808	1373.33	31.3333	4120	94
AMD1_0809	conserved protein of unknown function	797910	798386	477	-3	660	705	683	0.09	0.67	616	763	689	0.29	0.0976	740	644	692	-0.17	0.38	AMD1_0809	687	21.3333	2061	64
AMD1_0810	Imidazoleglycerol-phosphate dehydratase	798389	798988	600	-1	849	988	918	0.21	0.17	792	1070	931	0.42	0.00404	1038	902	970	-0.18	0.25	AMD1_0810	965.333	36	2896	108
AMD1_0811	peptidase component of the HslVU protease	799179	799727	549	3	604	538	571	-0.15	0.55	564	495	529	-0.17	0.49	480	491	486	0.0224	0.93	AMD1_0811	528	9.66667	1584	29
AMD1_0812	Aminoglycoside N(6')-acetyltransferase type 1	799735	800238	504	1	494	473	483	-0.0576	0.83	461	411	436	-0.15	0.57	399	432	415	0.0792	0.75	AMD1_0812	463.333	17.3333	1390	52
AMD1_0813	conserved membrane protein of unknown function	800235	800834	600	3	517	464	491	-0.13	0.66	483	412	448	-0.2	0.39	400	424	412	0.0546	0.84	AMD1_0813	456.667	106	1370	318
AMD1_0814	conserved membrane protein of unknown function	800834	801910	1077	2	643	705	674	0.12	0.66	600	632	616	0.07	0.79	613	644	628	0.0486	0.84	AMD1_0814	691.333	44.3333	2074	133
AMD1_0815	ATPase component of the HslVU protease	801940	803250	1311	1	1896	2003	1949	0.0735	0.77	1770	2021	1895	0.17	0.55	1961	1829	1895	-0.0705	0.78	AMD1_0815	1961.33	61	5884	183
AMD1_0816	conserved exported protein of unknown function	803408	804370	963	2	2068	2730	2399	0.39	0.000147	1931	2303	2117	0.24	0.14	2234	2494	2364	0.14	0.4	AMD1_0816	2663.33	131	7990	393
AMD1_0817	RapGH repressor	804367	804741	375	-2	88	99	93	0.15	0.61	82	101	92	0.27	0.27	98	90	94	-0.0891	0.71	AMD1_0817	96.3333	264	289	792
AMD1_0818	Putative DNA endonuclease SmrA	804738	805283	546	-3	212	229	221	0.0985	0.72	198	239	218	0.25	0.19	231	209	220	-0.11	0.61	AMD1_0818	222.667	20.6667	668	62
AMD1_0819	Membrane-bound lytic murein transglycosylase A precursor	805280	806386	1107	-1	542	605	573	0.15	0.36	506	544	525	0.0993	0.59	528	552	540	0.056	0.76	AMD1_0819	589.333	28	1768	84
AMD1_0820	Mitochondrial import inner membrane, translocase subunit	806409	807116	708	-3	2780	2459	2620	-0.17	0.34	2596	2632	2614	0.0188	0.93	2553	2246	2399	-0.17	0.24	AMD1_0820	2399.67	28.6667	7199	86
AMD1_0821	FxsA	807331	807804	474	1	280	338	309	0.25	0.18	262	271	266	0.0513	0.86	263	308	286	0.17	0.4	AMD1_0821	330	80.3333	990	241
AMD1_0822	Protein-export protein SecB	807916	808410	495	1	5402	6898	6150	0.34	0.00276	5045	8050	6548	0.66	7.22e-07	7805	6299	7052	-0.28	0.036	AMD1_0822	6731	126.667	20193	380
AMD1_0823	DNA polymerase III subunit epsilon	808477	809193	717	-2	1459	1859	1659	0.33	0.0166	1363	2433	1898	0.82	5.55e-12	2360	1698	2029	-0.44	0.00217	AMD1_0823	1806.67	63.3333	5420	190
AMD1_0824	Dephospho-CoA kinase	809263	809853	591	-2	502	485	493	-0.0458	0.83	469	617	543	0.38	0.0274	598	443	521	-0.39	0.0116	AMD1_0824	472.667	6.33333	1418	19
AMD1_0825	Shikimate dehydrogenase (NADP(+))	809850	810686	837	-3	464	552	508	0.24	0.14	433	560	497	0.35	0.0307	544	504	524	-0.0912	0.63	AMD1_0825	539	60.3333	1617	181
AMD1_0826	7-methyl-GTP pyrophosphatase	810679	811278	600	-2	383	475	429	0.3	0.0435	358	509	434	0.49	0.00375	494	434	464	-0.16	0.37	AMD1_0826	463.667	23.3333	1391	70
AMD1_0827	Putative pyruvate, phosphate dikinase regulatory protein	811332	812153	822	-3	254	291	273	0.18	0.35	237	277	257	0.21	0.3	269	266	267	-0.0154	0.95	AMD1_0827	284.333	36.6667	853	110
AMD1_0828	Uroporphyrinogen decarboxylase	812554	813588	1035	1	1186	1988	1587	0.73	1.46e-09	1107	2962	2034	1.4	2.98e-29	2873	1816	2344	-0.63	1.73e-06	AMD1_0828	1938.67	39.6667	5816	119
AMD1_0829	Protoporphyrinogen IX oxidase	813585	814124	540	3	690	1157	923	0.73	1.59e-10	644	1789	1216	1.46	2.43e-32	1734	1057	1395	-0.69	1.09e-07	AMD1_0829	1129	51	3387	153
AMD1_0830	transcription termination factor Rho	814289	815554	1266	2	4839	5012	4926	0.0491	0.77	4519	5564	5041	0.29	0.0309	5395	4578	4987	-0.22	0.11	AMD1_0830	4891	182	14673	546
AMD1_0831	Thymidylate kinase	815560	817578	2019	-2	1072	1314	1193	0.28	0.0207	1001	835	918	-0.25	0.1	810	1200	1005	0.53	0.000162	AMD1_0831	1282.33	662.667	3847	1988
AMD1_0832	tRNA modification GTPase MnmE	817642	818961	1320	1	418	404	411	-0.0488	0.82	391	414	402	0.082	0.73	402	369	385	-0.1	0.61	AMD1_0832	393.333	34.3333	1180	103
AMD1_0833	5-carboxymethylaminomethyluridine-tRNA synthase subunit MnmG	819131	821005	1875	2	1602	1439	1521	-0.15	0.39	1496	1518	1507	0.0211	0.92	1473	1314	1394	-0.14	0.43	AMD1_0833	1407.33	34.3333	4222	103
AMD1_0834	Ribosomal RNA small subunit methyltransferase G	821002	821634	633	1	545	527	536	-0.0452	0.87	509	519	514	0.0268	0.9	503	481	492	-0.0516	0.82	AMD1_0834	516	15.6667	1548	47
AMD1_0835	Chromosome partitioning protein ParA	821676	822473	798	3	1270	1264	1267	-0.0062	0.98	1186	1167	1176	-0.0212	0.92	1132	1154	1143	0.0234	0.91	AMD1_0835	1234.67	23.3333	3704	70
AMD1_0836	Chromosome-partitioning protein ParB	822507	823388	882	3	1952	2234	2093	0.19	0.22	1823	2132	1978	0.22	0.22	2068	2040	2054	-0.0179	0.93	AMD1_0836	2180.33	52	6541	156
AMD1_0837	DNA polymerase III delta subunit	823445	824494	1050	-1	432	488	460	0.16	0.35	403	486	445	0.26	0.14	472	445	459	-0.0686	0.73	AMD1_0837	474.333	76.3333	1423	229
AMD1_0838	Nitrogen fixation protein FixS	824547	824687	141	-3	93	147	120	0.61	0.00788	87	185	136	1.05	2.37e-07	179	134	157	-0.34	0.0931	AMD1_0838	142.667	3	428	9
AMD1_0839	Nitrogen fixation protein FixI	824684	826957	2274	-1	346	811	579	1.19	5.92e-11	323	1200	762	1.88	1.92e-47	1164	741	953	-0.59	0.00119	AMD1_0839	786.333	40.6667	2359	122
AMD1_0840	Nitrogen fixation protein FixH	826954	827451	498	-2	188	511	349	1.4	1.52e-13	175	882	529	2.31	3.74e-56	855	467	661	-0.82	1.14e-05	AMD1_0840	495.333	8	1486	24
AMD1_0841	Nitrogen fixation protein FixG	827448	829004	1557	-3	3541	5413	4477	0.41	0.32	3304	9120	6212	1.4	5.59e-08	8847	4944	6895	-0.78	1.47e-05	AMD1_0841	5268.33	70.3333	15805	211
AMD1_0842	Cbb3-type cytochrome c oxidase subunit FixPc	829167	830030	864	-3	1131	2599	1865	1.17	9.24e-15	1056	5395	3226	2.34	5.82e-47	5232	2374	3803	-1.09	2.85e-09	AMD1_0842	2522.33	19.3333	7567	58
AMD1_0843	Cytochrome c oxidase subunit CcoQ	830034	830183	150	-3	104	367	236	1.76	3.6e-13	97	615	356	2.64	1.23e-55	597	335	466	-0.75	0.000387	AMD1_0843	356	8.33333	1068	25
AMD1_0844	Cytochrome c oxidase subunit CcoO	830194	830925	732	-2	329	1110	719	1.71	7.46e-14	307	1816	1062	2.55	3.94e-86	1761	1014	1388	-0.71	0.000943	AMD1_0844	1076.67	113.333	3230	340
AMD1_0845	Cytochrome c oxidase subunit 1 homolog, bacteroid	830936	832552	1617	-1	1083	3760	2421	1.76	3.23e-21	1011	5356	3183	2.38	2.51e-49	5193	3434	4313	-0.55	0.000914	AMD1_0845	3658.33	159	10975	477
AMD1_0846	Hemerythrin domain-containing protein	832615	833184	570	1	1071	2742	1906	1.28	1.11e-06	1000	3554	2277	1.79	4.89e-16	3447	2504	2976	-0.38	0.0475	AMD1_0846	2659	88	7977	264
AMD1_0847	putative transcriptional activator	833194	833919	726	-2	413	859	636	1.04	4.78e-17	386	1273	829	1.71	1.98e-37	1235	784	1010	-0.63	1.26e-06	AMD1_0847	837	606.333	2511	1819
AMD1_0848	protein of unknown function	833888	834070	183	-1	78	164	121	1.01	1.9e-06	73	238	155	1.65	4.37e-13	230	150	190	-0.54	0.00754	AMD1_0848	159.667	764.333	479	2293
AMD1_0849	Oxygen-independent coproporphyrinogen III oxidase	834069	835418	1350	3	814	2409	1611	1.51	4.25e-10	760	3576	2168	2.19	4.89e-22	3468	2200	2834	-0.62	1.63e-05	AMD1_0849	2345.67	56	7037	168
AMD1_0850	UDP-glucose 6-dehydrogenase	835500	836831	1332	3	252	380	316	0.53	0.0404	235	664	449	1.48	1.6e-25	644	347	495	-0.8	0.000318	AMD1_0850	368	90.6667	1104	272
AMD1_0851	methylmalonyl-CoA mutase	836886	839027	2142	-3	556	644	600	0.2	0.2	519	479	499	-0.11	0.56	464	588	526	0.3	0.0487	AMD1_0851	628.667	157.667	1886	473
AMD1_0852	conserved membrane protein of unknown function	839024	839491	468	-1	131	139	135	0.0775	0.78	122	117	119	-0.0568	0.86	113	127	120	0.12	0.62	AMD1_0852	135.667	255.333	407	766
AMD1_0853	Propionyl-CoA carboxylase alpha chain	839488	841491	2004	-2	789	894	842	0.17	0.31	737	771	754	0.0626	0.73	748	817	782	0.11	0.51	AMD1_0853	873	36.6667	2619	110
AMD1_0854	Propionyl-CoA carboxylase beta chain	841503	843062	1560	-3	400	483	442	0.25	0.21	373	378	376	0.0198	0.94	367	441	404	0.21	0.29	AMD1_0854	473.333	46	1420	138
AMD1_0855	Biotin transporter	843035	843616	582	-1	105	144	125	0.41	0.0584	99	112	105	0.17	0.52	108	131	120	0.21	0.32	AMD1_0855	140.333	6.66667	421	20
AMD1_0856	Propionyl-CoA carboxylase regulator	843782	845194	1413	2	248	328	288	0.39	0.0153	231	271	251	0.21	0.32	263	300	281	0.16	0.39	AMD1_0856	320	116.667	960	350
AMD1_0857	conserved membrane protein of unknown function	845199	845555	357	-3	150	214	182	0.48	0.00436	140	391	265	1.44	1.99e-14	379	195	287	-0.9	9.37e-07	AMD1_0857	208.667	40	626	120
AMD1_0858	putative RNA-binding protein YhgF	845676	848054	2379	3	2156	1788	1972	-0.26	0.0266	2013	2723	2368	0.42	0.000322	2640	1633	2137	-0.67	3.31e-08	AMD1_0858	1746.33	81.3333	5239	244
AMD1_0859	Argininosuccinate synthase	848227	849444	1218	1	2670	2980	2825	0.15	0.27	2493	3562	3028	0.49	0.00169	3454	2722	3088	-0.3	0.0559	AMD1_0859	2910	86	8730	258
AMD1_0860	conserved protein of unknown function	849495	850064	570	-3	247	271	259	0.12	0.66	231	267	249	0.19	0.38	259	247	253	-0.0505	0.83	AMD1_0860	264.333	82.3333	793	247
AMD1_0861	Membrane-bound lytic murein transglycosylase B precursor	850141	850959	819	-2	5162	4354	4758	-0.24	0.0538	4821	4267	4544	-0.17	0.25	4138	3977	4058	-0.0523	0.74	AMD1_0861	4242	46	12726	138
AMD1_0862	Putrescine oxidase	851126	852361	1236	2	407	499	453	0.28	0.0881	380	268	324	-0.48	0.0148	260	456	358	0.75	4.88e-05	AMD1_0862	486.667	21.3333	1460	64
AMD1_0863	SH3b domain-containing protein	852478	853083	606	1	198	91	145	-1.06	3.15e-06	185	93	139	-0.94	6.31e-05	91	84	87	-0.0693	0.79	AMD1_0863	88.6667	20	266	60
AMD1_0864	Putative integral membrane protein	853120	853827	708	-2	70	67	69	-0.0562	0.88	66	78	72	0.2	0.49	76	62	69	-0.19	0.45	AMD1_0864	65.3333	20.3333	196	61
AMD1_0865	Cyclic di-GMP phosphodiesterase Gmr	854026	855768	1743	-2	1358	1264	1311	-0.0992	0.58	1268	981	1125	-0.34	0.0983	952	1154	1053	0.22	0.25	AMD1_0865	1228.67	54.3333	3686	163
AMD1_0866	protein of unknown function	855846	856160	315	3	2056	1514	1785	-0.41	0.0193	1920	1499	1709	-0.34	0.0232	1454	1383	1419	-0.0585	0.79	AMD1_0866	1469.33	19	4408	57
AMD1_0867	signal recognition particle protein component	856112	857692	1581	2	6590	4898	5744	-0.41	0.00221	6153	4652	5403	-0.38	0.0193	4513	4474	4494	-0.0104	0.97	AMD1_0867	4762.33	133.667	14287	401
AMD1_0868	Chorismate mutase I	857703	858029	327	3	2111	2410	2260	0.18	0.24	1971	2098	2035	0.0863	0.67	2035	2201	2118	0.0969	0.58	AMD1_0868	2348	75.6667	7044	227
AMD1_0869	30S ribosomal protein S16	858084	858476	393	3	1830	2528	2179	0.44	0.0123	1710	2585	2148	0.55	0.0162	2506	2309	2408	-0.0917	0.68	AMD1_0869	2465	70.6667	7395	212
AMD1_0870	Cupin_2 domain-containing protein	858644	859177	534	2	373	377	375	0.014	0.96	348	258	303	-0.41	0.0397	250	344	297	0.41	0.0144	AMD1_0870	367.333	64	1102	192
AMD1_0871	Putative membrane protein	859168	860073	906	-2	100	137	118	0.42	0.047	93	100	97	0.0823	0.8	97	125	111	0.28	0.22	AMD1_0871	133.667	175.667	401	527
AMD1_0872	Glyco_trans_4-like_N domain-containing protein	860234	861481	1248	-1	531	550	540	0.0485	0.8	496	537	516	0.11	0.56	521	503	512	-0.0428	0.82	AMD1_0872	536	41.6667	1608	125
AMD1_0873	Aspartate-semialdehyde dehydrogenase	861654	862688	1035	-3	2022	1894	1958	-0.0907	0.58	1888	2395	2141	0.32	0.12	2323	1729	2026	-0.36	0.0485	AMD1_0873	1847.67	73.3333	5543	220
AMD1_0874	protein of unknown function	862742	862963	222	2	32	42	37	0.28	0.47	30	28	29	-0.0722	0.87	27	38	33	0.28	0.29	AMD1_0874	41	1543.33	123	4630
AMD1_0875	conserved membrane protein of unknown function	863480	863941	462	2	44	24	34	-0.66	0.091	41	20	31	-0.85	0.0279	20	22	21	0.0664	0.8	AMD1_0876	93.3333	27.3333	280	82
AMD1_0876	conserved exported protein of unknown function	863079	863465	387	3	165	96	130	-0.73	0.00124	154	105	130	-0.49	0.0797	102	87	95	-0.14	0.58	AMD1_0875	23.6667	157	71	471
AMD1_0877	Inner membrane ABC transporter ATP-binding protein YddA	863944	865848	1905	-2	690	981	835	0.49	0.000257	644	723	683	0.16	0.41	701	896	798	0.32	0.0202	AMD1_0877	956.667	69.6667	2870	209
AMD1_0878	Inner membrane protein YhaI	866152	866856	705	1	346	359	353	0.0523	0.83	323	265	294	-0.27	0.16	257	328	293	0.31	0.0797	AMD1_0878	349.667	689	1049	2067
AMD1_0879	3-isopropylmalate dehydrogenase	866859	867962	1104	-3	2172	2587	2380	0.24	0.19	2029	3174	2602	0.62	0.000122	3078	2363	2720	-0.34	0.0409	AMD1_0879	2531.67	118.667	7595	356
AMD1_0880	Antitoxin VapB11	868104	868334	231	3	470	466	468	-0.0131	0.96	439	381	410	-0.19	0.34	370	425	398	0.17	0.37	AMD1_0880	455	18.6667	1365	56
AMD1_0881	Ribonuclease VapC	868331	868720	390	2	360	356	358	-0.0162	0.96	337	251	294	-0.4	0.0137	243	325	284	0.36	0.0326	AMD1_0881	348	97.6667	1044	293
AMD1_0882	Aminoacrylate peracid reductase RutC	868748	869128	381	-1	138	165	151	0.23	0.32	128	252	190	0.92	4.02e-05	244	151	197	-0.61	0.00379	AMD1_0882	160.333	40.3333	481	121
AMD1_0883	conserved exported protein of unknown function	869137	869970	834	-2	171	233	202	0.42	0.0186	160	376	268	1.2	2.04e-10	365	213	289	-0.72	7.75e-05	AMD1_0883	227.667	52.6667	683	158
AMD1_0884	3-isopropylmalate dehydratase subunit LeuD	870163	870768	606	-2	2497	2735	2616	0.12	0.52	2332	3093	2712	0.38	0.0495	2998	2498	2748	-0.22	0.25	AMD1_0884	2672.33	83.3333	8017	250
AMD1_0885	putative siderophore-binding lipoprotein YfiY	870907	871821	915	-2	64	73	68	0.16	0.61	60	106	83	0.75	0.00317	103	66	85	-0.51	0.028	AMD1_0885	71	69.3333	213	208
AMD1_0886	Putative siderophore transport system permease protein YfiZ	871912	872934	1023	1	48	55	52	0.16	0.69	45	77	61	0.7	0.0127	75	51	63	-0.41	0.0922	AMD1_0886	53.6667	10.6667	161	32
AMD1_0887	Putative siderophore transport system permease protein YfhA	872931	873983	1053	3	53	57	55	0.0883	0.81	50	76	63	0.55	0.0459	74	52	63	-0.37	0.11	AMD1_0887	55.6667	23.6667	167	71
AMD1_0888	ferric enterobactin ABC transporter ATP binding subunit	873976	874791	816	1	35	36	36	0.0336	0.94	33	54	43	0.63	0.0482	52	33	43	-0.45	0.1	AMD1_0888	35	16.6667	105	50
AMD1_0889	conserved protein of unknown function	874862	875320	459	-1	121	111	116	-0.11	0.73	113	122	118	0.0916	0.76	118	102	110	-0.15	0.51	AMD1_0889	109	4.66667	327	14
AMD1_0890	methylglyoxal reductase DkgB	875530	876363	834	-2	73	108	90	0.49	0.0742	68	99	84	0.47	0.0941	96	98	97	0.0144	0.96	AMD1_0890	105.667	44.3333	317	133
AMD1_0891	Uncharacterized MFS-type transporter YtbD	876452	877633	1182	-1	16	20	18	0.23	0.6	14	19	17	0.23	0.59	18	18	18	0.00929	0.98	AMD1_0891	19.6667	11.3333	59	34
AMD1_0892	D-malate degradation protein R	877787	878689	903	2	152	136	144	-0.15	0.54	142	129	136	-0.13	0.64	125	124	125	-0.00572	0.99	AMD1_0892	132.333	67	397	201
AMD1_0893	conserved exported protein of unknown function	878760	879077	318	3	181	116	149	-0.59	0.0049	169	109	139	-0.59	0.00519						AMD1_0893	113.667	88.6667	341	266
AMD1_0894	putative glutathione S-transferase-related transmembrane protein	879147	879635	489	-3	344	332	338	-0.0466	0.86	322	281	301	-0.19	0.32	272	304	288	0.13	0.53	AMD1_0894	325.333	27.3333	976	82
AMD1_0895	Transcriptional regulator, ArsR family	879662	880003	342	-1	332	283	308	-0.22	0.27	310	268	289	-0.19	0.36	260	258	259	-0.0123	0.96	AMD1_0895	275.667	10.3333	827	31
AMD1_0896	6-hydroxy-D-nicotine oxidase	880125	881564	1440	-3	381	313	347	-0.27	0.14	356	216	286	-0.68	0.00128	209	286	248	0.37	0.0721	AMD1_0896	304.333	16	913	48
AMD1_0897	Alginate_exp domain-containing protein	881790	883307	1518	3	752	940	846	0.31	0.0392	703	680	691	-0.044	0.84	660	858	759	0.34	0.0257	AMD1_0897	916	149.667	2748	449
AMD1_0898	6-aminohexanoate-dimer hydrolase	883288	884640	1353	1	540	619	579	0.19	0.32	504	427	465	-0.23	0.22	414	565	490	0.4	0.019	AMD1_0898	603.667	55.6667	1811	167
AMD1_0899	RNA polymerase sigma factor SigJ	884686	885558	873	-2	90	73	81	-0.25	0.4	84	82	83	-0.027	0.94	80	67	73	-0.15	0.54	AMD1_0899	70.6667	30	212	90
AMD1_0900	protein of unknown function	885562	885699	138	-2	46	37	42	-0.26	0.48	43	40	42	-0.0989	0.79	39	34	36	-0.11	0.69	AMD1_0900	35.6667	4	107	12
AMD1_0901	Alkylhydroperoxidase AhpD family core domain protein	885686	886144	459	2	-	-			-	11	11	11	0.00933	0.98	11	8.41	9.46	-0.0831	0.73	AMD1_0901	9	252	27	756
AMD1_0902	Putative integral membrane protein	886205	887002	798	-1	869	1525	1197	0.76	0.000335	811	1943	1377	1.22	5.35e-10	1884	1393	1639	-0.39	0.0193	AMD1_0902	1483.67	42.3333	4451	127
AMD1_0903	protein of unknown function	887089	887358	270	1	12	22	17	0.52	0.22	12	26	19	0.85	0.0481	25	20	22	-0.13	0.62	AMD1_0903	21	272.333	63	817
AMD1_0904	Cold shock protein CspA	887507	887716	210	2	886	1483	1185	0.44	0.31	828	1976	1402	1.19	1.77e-06	1916	1355	1636	-0.38	0.11	AMD1_0904	1429.33	33.3333	4288	100
AMD1_0905	conserved protein of unknown function	887821	888042	222	1	103	140	122	0.17	0.7	97	219	158	1.06	0.00133	213	128	170	-0.56	0.0393	AMD1_0905	134.667	10.6667	404	32
AMD1_0906	conserved exported protein of unknown function	888219	889775	1557	-3	336	352	344	0.0609	0.79	314	267	291	-0.22	0.23	259	322	290	0.27	0.13	AMD1_0906	342.333	440	1027	1320
AMD1_0907	protein of unknown function	890121	890456	336	-3	58	55	57	-0.0649	0.87	55	92	73	0.67	0.0163	89	50	70	-0.71	0.00321	AMD1_0907	53.3333	55.6667	160	167
AMD1_0908	Monomeric sarcosine oxidase	890612	891781	1170	-1	709	824	767	0.21	0.15	662	1009	836	0.59	1.11e-05	979	753	866	-0.35	0.013	AMD1_0908	803.667	34.3333	2411	103
AMD1_0909	(3S)-malyl-CoA thioesterase	891801	892778	978	3	938	910	924	-0.0423	0.81	876	800	838	-0.13	0.43	776	832	804	0.0876	0.6	AMD1_0909	886.333	172	2659	516
AMD1_0910	conserved protein of unknown function	892775	892981	207	2	579	627	603	0.11	0.54	540	448	494	-0.26	0.11	434	573	503	0.36	0.0104	AMD1_0910	611.667	81	1835	243
AMD1_0911	Acetylglutamate kinase	893003	893425	423	-1	647	717	682	0.14	0.46	604	737	670	0.27	0.14	715	655	685	-0.11	0.6	AMD1_0911	698.333	171.667	2095	515
AMD1_0912	conserved protein of unknown function	893619	894611	993	3	279	261	270	-0.0879	0.76	260	407	333	0.61	0.000989	394	238	316	-0.68	3.46e-05	AMD1_0912	254.333	8	763	24
AMD1_0913	Protein ImuB	894634	896022	1389	1	144	140	142	-0.0446	0.88	135	188	161	0.44	0.0359	182	128	155	-0.44	0.0191	AMD1_0913	136.333	36.6667	409	110
AMD1_0914	Error-prone DNA polymerase	896019	899366	3348	3	440	468	454	0.0844	0.67	411	607	509	0.54	0.000358	588	428	508	-0.42	0.00303	AMD1_0914	456.667	193	1370	579
AMD1_0915	conserved protein of unknown function	899392	899616	225	-2	342	291	316	-0.22	0.22	319	265	292	-0.25	0.15	257	266	262	0.0401	0.85	AMD1_0915	284	53.6667	852	161
AMD1_0916	Lon protease 2	899639	900310	672	-1	778	738	758	-0.0718	0.71	727	724	726	-0.00293	0.99	703	674	688	-0.052	0.78	AMD1_0916	721.333	59.3333	2164	178
AMD1_0917	Thioredoxin C-1	900382	901350	969	-2	1433	1347	1390	-0.0858	0.59	1338	1293	1315	-0.0457	0.83	1254	1231	1242	-0.0249	0.9	AMD1_0917	1313.33	29.3333	3940	88
AMD1_0918	Prolyl-tRNA deacylase ProX	901424	901936	513	-1	675	681	678	0.0114	0.97	630	644	637	0.0315	0.91	625	622	623	-0.00846	0.98	AMD1_0918	663	15	1989	45
AMD1_0919	conserved protein of unknown function	902596	903558	963	1	33	26	30	-0.23	0.56	31	39	35	0.25	0.49	38	24	31	-0.36	0.19	AMD1_0919	25.6667	15.6667	77	47
AMD1_0920	ParB family chromosome partitioning protein	903718	905844	2127	1	30	40	35	0.31	0.39	28	31	29	0.0781	0.86	30	36	33	0.16	0.53	AMD1_0920	39	76.6667	117	230
AMD1_0921	conserved protein of unknown function	905966	906382	417	2																AMD1_0921	6.33333	12.6667	19	38
AMD1_0922	conserved protein of unknown function	906379	906645	267	1																AMD1_0922	0.666667	18	2	54
AMD1_0923	conserved protein of unknown function	906642	906938	297	3																AMD1_0923	1	11.6667	3	35
AMD1_0924	Methylase	907098	911405	4308	3	36	38	37	0.0553	0.89	34	43	38	0.24	0.55	42	35	38	-0.11	0.68	AMD1_0924	37.3333	109.333	112	328
AMD1_0925	DNA primase	911405	912439	1035	2	-	-			-	13	10	12	-0.24	0.59	9.85	8.25	9.05	-0.0461	0.84	AMD1_0925	8.66667	43.6667	26	131
AMD1_0926	conserved protein of unknown function	912751	913677	927	1	-	-			-	8.46	9.24	8.85	0.042	0.93	8.93	13	11	0.13	0.53	AMD1_0926	14.3333	67	43	201
AMD1_0927	Putative plasmid stability protein y4jJ	913764	914018	255	3	88	124	106	0.44	0.0518	82	75	79	-0.13	0.67	73	113	93	0.55	0.0102	AMD1_0927	121	4	363	12
AMD1_0928	VapC ribonuclease Y4jK	914015	914437	423	2	156	169	163	0.1	0.7	146	122	134	-0.23	0.34	119	155	137	0.3	0.14	AMD1_0928	165.333	11.6667	496	35
AMD1_0929	conserved protein of unknown function	914721	914888	168	3																AMD1_0929	2	4.66667	6	14
AMD1_0930	conserved membrane protein of unknown function	915021	915461	441	3	13	17	15	0.24	0.58	12	12		0.000758	1	12	15	13	0.14	0.58	AMD1_0930	16.3333	12.6667	49	38
AMD1_0931	conserved protein of unknown function	916032	916358	327	3																AMD1_0931	8	16	24	48
AMD1_0932	XRE family transcriptional regulator	916649	916909	261	2	1513	1319	1416	-0.19	0.16	1413	1187	1300	-0.24	0.14	1151	1205	1178	0.0555	0.77	AMD1_0932	1288.33	16.3333	3865	49
AMD1_0933	conserved protein of unknown function	917012	917275	264	2	266	263	265	-0.0134	0.96	248	204	226	-0.26	0.2	198	241	219	0.23	0.2	AMD1_0933	257	16	771	48
AMD1_0934	protein of unknown function	917344	917739	396	1	67	58	62	-0.19	0.55	63	42	53	-0.48	0.11	41	53	47	0.21	0.39	AMD1_0934	56.3333	51.6667	169	155
AMD1_0935	conserved protein of unknown function	917630	918160	531	2	34	24	29	-0.39	0.3	32	21	26	-0.45	0.24	20	22	21	0.0378	0.89	AMD1_0935	23.3333	113.667	70	341
AMD1_0936	Reverse transcriptase domain-containing protein	918491	920185	1695	2	929	969	949	0.0575	0.75	868	652	760	-0.39	0.00681	633	885	759	0.45	0.00122	AMD1_0936	945	473	2835	1419
AMD1_0937	DNA polymerase I	920178	921728	1551	3	430	456	443	0.0811	0.67	401	362	381	-0.14	0.43	351	416	384	0.22	0.16	AMD1_0937	444.333	85.3333	1333	256
AMD1_0938	DNA polymerase III subunit epsilon	921846	922766	921	3	260	244	252	-0.0842	0.73	242	215	229	-0.16	0.5	209	223	216	0.0719	0.74	AMD1_0938	238	82	714	246
AMD1_0939	Transcriptional regulator	923364	923645	282	3																AMD1_0939	1.66667	9.66667	5	29
AMD1_0940	Replication protein	923760	924824	1065	3	16	14	15	-0.11	0.81	15	18	17	0.13	0.78	18	13	15	-0.13	0.6	AMD1_0940	14	38.6667	42	116
AMD1_0941	Chromosome (plasmid) partitioning protein ParA	924821	925474	654	2																AMD1_0941	3	9.33333	9	28
AMD1_0942	conserved protein of unknown function	925471	925722	252	1																AMD1_0942	0.666667	8.33333	2	25
AMD1_0943	Glycosidase	925719	926240	522	3																AMD1_0943	4.33333	15.3333	13	46
AMD1_0944	Peptidase S26	926237	926782	546	2	10	24	17	0.79	0.11	9.53	23	16	0.2	0.53	23	22	22	-0.00233	0.99	AMD1_0944	24	26.6667	72	80
AMD1_0945	conserved protein of unknown function	926851	927186	336	1	17	11	14	-0.36	0.4	16	14	15	-0.0922	0.85	14	9.91	12	-0.11	0.64	AMD1_0945	10.6667	10	32	30
AMD1_0946	Lytic transglycosylase	927190	927969	780	1	-	-			-	9.41	8.29	8.85	-0.11	0.83						AMD1_0946	4.66667	84.6667	14	254
AMD1_0947	Type VI secretion protein	928198	929949	1752	1	73	66	70	-0.11	0.77	68	75	72	0.1	0.78	73	61	67	-0.15	0.55	AMD1_0947	64.6667	71	194	213
AMD1_0948	Type IV secretion system protein VirD4	929976	931967	1992	3	123	116	119	-0.0636	0.84	114	113	114	-0.0234	0.95	109	106	108	-0.0234	0.94	AMD1_0948	113.667	60.6667	341	182
AMD1_0949	CopG family transcriptional regulator	931972	932418	447	1	-	-			-	7.33	7.87	7.6	0.0308	0.95	7.63	12	9.97	0.19	0.4	AMD1_0949	13.3333	37.3333	40	112
AMD1_0950	putative conjugal transfer protein TrbB	932591	933574	984	2																AMD1_0950	4.66667	36.6667	14	110
AMD1_0951	Conjugative transfer protein TrbC	933571	933903	333	1																AMD1_0951	3.33333	6.66667	10	20
AMD1_0952	Type IV secretion system protein VirB3	933903	934184	282	3																AMD1_0952	1	4.66667	3	14
AMD1_0953	Conjugal transfer protein TrbE	934199	936646	2448	2	33	29	31	-0.14	0.73	31	32	32	0.0139	0.98	31	27	29	-0.0733	0.78	AMD1_0953	28.6667	117.333	86	352
AMD1_0954	Conjugative transfer protein TrbJ	936652	937431	780	1																AMD1_0954	5	36	15	108
AMD1_0955	conserved protein of unknown function	937442	937726	285	2																AMD1_0955	1	13.3333	3	40
AMD1_0956	Conjugative transfer protein TrbL	937730	939088	1359	2											6.73	7.37	7.05	0.0281	0.9	AMD1_0956	8	27.6667	24	83
AMD1_0957	Conjugative transfer protein TrbF	939085	939774	690	1											9.41	4.97	7.19	-0.21	0.32	AMD1_0957	5.33333	29.3333	16	88
AMD1_0958	Conjugal transfer protein TrbG	939771	940751	981	3											8.13	6.21	7.17	-0.0711	0.74	AMD1_0958	6.66667	46.3333	20	139
AMD1_0959	Conjugal transfer protein TraI	940748	941932	1185	2											6.89	8.09	7.49	0.0382	0.85	AMD1_0959	8.66667	87	26	261
AMD1_0960	conserved protein of unknown function	941934	942173	240	3	-	-			-	13	12	13	-0.11	0.82	12	7.75	9.74	-0.14	0.53	AMD1_0960	8.33333	107.667	25	323
AMD1_0961	Transcriptional regulator, LysR family	942168	943061	894	-3	829	840	834	0.018	0.94	774	727	750	-0.0865	0.66	705	767	736	0.11	0.56	AMD1_0961	818.333	19.3333	2455	58
AMD1_0962	ATPase AAA	943205	946501	3297	-1	3958	3817	3887	-0.0493	0.82	3696	3490	3593	-0.0798	0.68	3385	3485	3435	0.0352	0.86	AMD1_0962	3732.33	115.667	11197	347
AMD1_0963	Cytoplasmic protein	946514	949312	2799	-1	3726	3842	3784	0.0407	0.85	3479	3835	3657	0.13	0.48	3719	3508	3614	-0.0691	0.73	AMD1_0963	3757	329	11271	987
AMD1_0964	conserved protein of unknown function	949389	951071	1683	-3	2527	2423	2475	-0.0565	0.81	2360	2614	2487	0.14	0.45	2536	2213	2374	-0.17	0.33	AMD1_0964	2371.33	252.333	7114	757
AMD1_0965	SNF2 domain-containing protein	951082	954585	3504	-2	3187	3118	3153	-0.0292	0.91	2977	3439	3208	0.2	0.26	3336	2847	3091	-0.2	0.24	AMD1_0965	3051.33	118.333	9154	355
AMD1_0966	Transcriptional regulator	954607	955491	885	-2	986	674	830	-0.5	0.018	921	1063	992	0.19	0.45	1030	615	823	-0.68	0.000254	AMD1_0966	658	115	1974	345
AMD1_0967	PDDEXK_1 domain-containing protein	955686	958343	2658	3	718	749	734	0.0552	0.85	671	1067	869	0.64	0.000192	1035	684	859	-0.54	0.000949	AMD1_0967	733.667	54.3333	2201	163
AMD1_0968	DNA helicase	958340	961729	3390	2	862	951	907	0.13	0.62	805	1205	1005	0.56	0.000383	1168	868	1018	-0.38	0.0237	AMD1_0968	932.333	147.333	2797	442
AMD1_0969	DNA helicase	961745	964537	2793	2	3226	3688	3457	0.19	0.23	3013	2946	2979	-0.0309	0.87	2857	3368	3113	0.22	0.11	AMD1_0969	3602.67	696.333	10808	2089
AMD1_0970	HipA domain-containing protein	964598	966451	1854	-1	505	577	541	0.18	0.4	471	468	469	-0.0117	0.97	454	527	490	0.19	0.24	AMD1_0970	563.667	95.6667	1691	287
AMD1_0971	ParB-like nuclease	966762	967652	891	-3	321	290	305	-0.14	0.5	299	209	254	-0.5	0.00569	203	265	234	0.34	0.0476	AMD1_0971	282.667	12.6667	848	38
AMD1_0972	Plasmid stablization protein ParB	967660	968538	879	-2	198	179	189	-0.13	0.6	185	103	144	-0.79	0.000203	100	164	132	0.63	0.0014	AMD1_0972	175	10.6667	525	32
AMD1_0973	Recombinase family protein	968535	970103	1569	-3	504	489	497	-0.0424	0.84	471	282	376	-0.71	5.09e-06	273	447	360	0.67	7.28e-06	AMD1_0973	476.333	81.3333	1429	244
AMD1_0974	protein of unknown function	970177	970593	417	1	162	61	112	-1.33	2.56e-06	151	101	126	-0.52	0.0612	98	56	77	-0.7	0.00227	AMD1_0974	59.6667	102.667	179	308
AMD1_0975	DNA helicase IV	970744	973398	2655	1	1152	990	1071	-0.2	0.34	1076	867	971	-0.3	0.0845	841	904	872	0.0851	0.68	AMD1_0975	961	234	2883	702
AMD1_0976	conserved protein of unknown function	973464	973925	462	-3	333	297	315	-0.15	0.49	311	331	321	0.0795	0.72	321	272	296	-0.19	0.32	AMD1_0976	288.667	53.3333	866	160
AMD1_0977	ThiF domain-containing protein	973925	975109	1185	-1	343	264	304	-0.35	0.0652	321	361	341	0.17	0.38	351	241	296	-0.48	0.00717	AMD1_0977	258.333	111.667	775	335
AMD1_0978	conserved protein of unknown function	975084	975743	660	-3	231	195	213	-0.23	0.24	216	241	228	0.15	0.5	234	178	206	-0.34	0.0563	AMD1_0978	190.333	14.6667	571	44
AMD1_0979	conserved protein of unknown function	975883	976272	390	1	957	1018	987	0.0837	0.69	893	954	924	0.0899	0.65	925	930	927	0.00496	0.98	AMD1_0979	995.333	10.6667	2986	32
AMD1_0980	RES domain-containing protein	976247	976969	723	2	1025	1113	1069	0.11	0.52	957	1002	979	0.064	0.74	972	1016	994	0.0546	0.78	AMD1_0980	1088	23	3264	69
AMD1_0981	protein of unknown function	977363	977716	354	-1	46	34	40	-0.35	0.32	43	59	51	0.38	0.24	58	31	44	-0.72	0.013	AMD1_0981	32.6667	175	98	525
AMD1_0982	HTH OST-type domain-containing protein	977789	978565	777	2	813	818	815	0.00859	0.97	759	671	715	-0.17	0.34	651	747	699	0.17	0.31	AMD1_0982	795.667	30.3333	2387	91
AMD1_0983	conserved protein of unknown function	978562	979323	762	1	423	453	438	0.0931	0.66	395	353	374	-0.15	0.47	343	414	378	0.23	0.18	AMD1_0983	441	62	1323	186
AMD1_0984	protein of unknown function	979390	979572	183	-2	27	35	31	0.26	0.48	26	25	25	0.00297	0.99	25	32	28	0.16	0.53	AMD1_0984	34.3333	2493.67	103	7481
AMD1_0985	protein of unknown function	979975	980271	297	1	3013	4148	3580	0.44	0.000569	2814	3379	3096	0.25	0.16	3276	3789	3532	0.18	0.24	AMD1_0985	4038.33	189	12115	567
AMD1_0986	Site-specific recombinase XerD	980541	981812	1272	-3	795	607	701	-0.36	0.048	742	458	600	-0.66	0.000248	444	554	499	0.27	0.13	AMD1_0986	593.667	512.333	1781	1537
AMD1_0987	protein of unknown function	981850	982053	204	-2	13	13	13	0.00827	0.99	12	7.95	9.99	-0.34	0.45	7.7	12	9.81	0.18	0.44	AMD1_0987	12.6667	11.6667	38	35
AMD1_0988	dehydrogenase clustered with L-fuconate utilization genes	982177	982953	777	-2	101	91	96	-0.13	0.67	94	57	75	-0.64	0.0174	55	83	69	0.44	0.0707	AMD1_0988	88.6667	12.6667	266	38
AMD1_0989	L-fuconate dehydratase	982965	984242	1278	-3	241	248	245	0.0412	0.89	225	146	186	-0.57	0.00931	142	227	184	0.6	0.00243	AMD1_0989	242.667	64.3333	728	193
AMD1_0990	Ureidoglycolate lyase	984264	985118	855	-3	148	181	164	0.26	0.32	138	99	119	-0.44	0.0656	96	165	131	0.7	0.0012	AMD1_0990	177	22	531	66
AMD1_0991	D-allose-binding periplasmic protein	985183	986130	948	-2	1195	1387	1291	0.18	0.56	1117	278	698	-1.95	1.4e-15	270	1266	768	2.2	9.42e-32	AMD1_0991	1358	77.3333	4074	232
AMD1_0992	ribose ABC transporter membrane subunit	986232	987230	999	-3	191	200	195	0.0562	0.87	178	80	129	-1.1	3.2e-07	78	182	130	1.13	1.21e-05	AMD1_0992	196	40.3333	588	121
AMD1_0993	D-galactose/methyl-galactoside ABC transporter ATP binding subunit	987227	988771	1545	-1	271	297	284	0.12	0.6	254	135	194	-0.87	2.33e-06	131	271	201	1	5.79e-08	AMD1_0993	290	40	870	120
AMD1_0994	L-fuconolactone hydrolase	988768	989652	885	-2	70	91	81	0.34	0.18	65	48	57	-0.41	0.18	46	83	65	0.73	0.00533	AMD1_0994	89.3333	9.66667	268	29
AMD1_0995	2-keto-3-deoxy-L-fuconate dehydrogenase	989667	990416	750	-3	136	150	143	0.13	0.62	127	113	120	-0.16	0.58	109	137	123	0.26	0.22	AMD1_0995	146	16.3333	438	49
AMD1_0996	protein of unknown function	990301	990543	243	-2	71	59	65	-0.2	0.53	66	60	63	-0.13	0.71	58	54	56	-0.0474	0.87	AMD1_0996	57.6667	44.3333	173	133
AMD1_0997	Transcriptional regulator KdgR	990537	991319	783	3	141	180	161	0.34	0.078	131	202	167	0.58	0.0021	196	165	180	-0.2	0.29	AMD1_0997	176	84.6667	528	254
AMD1_0998	D-ribose pyranase	991598	992038	441	-1	326	357	341	0.12	0.58	305	270	287	-0.16	0.5	262	326	294	0.26	0.14	AMD1_0998	347.667	8.66667	1043	26
AMD1_0999	Stage 0 sporulation protein KE	992143	992892	750	-2	406	475	441	0.21	0.24	379	413	396	0.12	0.56	400	434	417	0.0966	0.61	AMD1_0999	462	17.3333	1386	52
AMD1_1000	putative D,D-dipeptide ABC transporter ATP-binding subunit DdpD	992889	993722	834	-3	479	540	509	0.16	0.44	447	470	459	0.0679	0.77	456	493	474	0.097	0.6	AMD1_1000	525.333	29.3333	1576	88
AMD1_1001	putative D,D-dipeptide ABC transporter membrane subunit DdpC	993719	994636	918	-1	289	386	338	0.39	0.0214	270	298	284	0.13	0.57	289	352	321	0.24	0.15	AMD1_1001	376.667	18	1130	54
AMD1_1002	putative D,D-dipeptide ABC transporter membrane subunit DdpB	994633	995691	1059	-2	491	640	565	0.36	0.0157	459	460	459	0.00863	0.98	446	584	515	0.34	0.0353	AMD1_1002	624	44	1872	132
AMD1_1003	Putative D,D-dipeptide-binding periplasmic protein DdpA	995719	997359	1641	-2	2157	2499	2328	0.2	0.2	2015	1900	1957	-0.0798	0.7	1842	2282	2062	0.27	0.11	AMD1_1003	2443.67	153.667	7331	461
AMD1_1004	Microsomal dipeptidase	997394	998452	1059	-1	544	720	632	0.38	0.0119	508	797	652	0.63	1.26e-05	773	658	715	-0.2	0.19	AMD1_1004	702.667	29.6667	2108	89
AMD1_1005	NADP-specific glutamate dehydrogenase	998799	1000064	1266	3	1833	3359	2596	0.86	2.07e-13	1712	5651	3681	1.71	6.96e-53	5480	3068	4274	-0.81	5.87e-10	AMD1_1005	3270.67	65	9812	195
AMD1_1006	Homoserine/homoserine lactone efflux protein	1000268	1000909	642	2	658	765	711	0.21	0.14	614	1034	824	0.73	4.66e-07	1003	698	851	-0.49	0.000665	AMD1_1006	746	76	2238	228
AMD1_1007	conserved membrane protein of unknown function	1000890	1001351	462	-3	231	246	238	0.0801	0.74	216	245	230	0.17	0.45	238	225	231	-0.0701	0.75	AMD1_1007	239.333	235	718	705
AMD1_1008	conserved membrane protein of unknown function	1001348	1001782	435	-1	596	554	575	-0.1	0.63	557	633	595	0.18	0.32	614	506	560	-0.24	0.14	AMD1_1008	539	153.333	1617	460
AMD1_1009	Dual-specificity RNA methyltransferase RlmN	1001782	1003014	1233	-2	1606	1380	1493	-0.21	0.19	1499	1684	1591	0.16	0.39	1633	1260	1447	-0.33	0.0408	AMD1_1009	1346	109	4038	327
AMD1_1010	conserved protein of unknown function	1003159	1003491	333	1	151	158	154	0.0531	0.84	141	91	116	-0.58	0.00954	88	144	116	0.62	0.00266	AMD1_1010	153.667	32.6667	461	98
AMD1_1011	Putative acetyltransferase	1003502	1003999	498	-1	152	93	122	-0.65	0.00251	142	209	175	0.52	0.0142	203	85	144	-1.19	2.06e-08	AMD1_1011	90.6667	114.667	272	344
AMD1_1012	conserved exported protein of unknown function	1004067	1004570	504	-3	4719	4258	4488	-0.14	0.34	4406	5348	4877	0.27	0.0869	5185	3889	4537	-0.38	0.00488	AMD1_1012	4147.33	72.6667	12442	218
AMD1_1013	conserved protein of unknown function	1004810	1005172	363	-1	606	435	520	-0.43	0.0901	566	356	461	-0.59	0.0307	345	397	371	0.13	0.6	AMD1_1013	426	26	1278	78
AMD1_1014	Putative pterin-4-alpha-carbinolamine dehydratase	1005248	1005544	297	-1	555	770	662	0.46	0.000207	518	543	530	0.0625	0.75	526	703	615	0.38	0.00499	AMD1_1014	750.667	8	2252	24
AMD1_1015	Low molecular weight protein-tyrosine-phosphatase	1005597	1006115	519	3	334	419	376	0.31	0.0438	311	470	391	0.57	0.000157	456	382	419	-0.22	0.16	AMD1_1015	408	165.333	1224	496
AMD1_1016	RNA 2',3'-cyclic phosphodiesterase	1006019	1006615	597	-1	666	776	721	0.2	0.29	622	533	577	-0.21	0.25	517	709	613	0.42	0.00432	AMD1_1016	758.667	274	2276	822
AMD1_1017	Arylesterase precursor	1006755	1007375	621	-3	336	242	289	-0.45	0.0137	314	311	312	-0.00752	0.98	302	221	261	-0.38	0.0618	AMD1_1017	236.667	211.333	710	634
AMD1_1018	putative ABC transporter ATP-binding protein YbbA	1007441	1008148	708	2	261	272	267	0.0493	0.87	244	440	342	0.81	5.1e-05	426	248	337	-0.71	0.000383	AMD1_1018	266.333	3.33333	799	10
AMD1_1019	ABC transporter, permease protein	1008159	1010702	2544	3	772	815	794	0.0691	0.8	721	1260	991	0.78	5.19e-06	1222	744	983	-0.66	0.000125	AMD1_1019	798	32	2394	96
AMD1_1020	Integral membrane protein	1010825	1011676	852	2	15900	19600	17800	0.29	0.0991	14900	15800	15300	0.0784	0.74	15300	17900	16600	0.2	0.21	AMD1_1020	19176.3	143.333	57529	430
AMD1_1021	Phosphinothricin N-acetyltransferase	1011785	1012360	576	2	244	268	256	0.12	0.64	228	231	230	0.0179	0.95	224	245	235	0.11	0.6	AMD1_1021	261.667	79.6667	785	239
AMD1_1022	Protein-L-isoaspartate O-methyltransferase 1	1012362	1013000	639	-3	68	38	53	-0.74	0.0148	63	46	55	-0.39	0.23	44	35	40	-0.21	0.4	AMD1_1022	37	36.6667	111	110
AMD1_1023	protein of unknown function	1013138	1013353	216	-1	198	200	199	0.011	0.98	185	121	153	-0.56	0.0261	117	182	150	0.53	0.0211	AMD1_1023	193.667	703	581	2109
AMD1_1024	protein of unknown function	1013386	1013529	144	-2	106	96	101	-0.11	0.74	99	74	86	-0.37	0.18	71	88	80	0.22	0.32	AMD1_1024	93.6667	349.667	281	1049
AMD1_1025	Succinate-semialdehyde dehydrogenase [NADP(+)]	1013583	1015097	1515	3	308	346	327	0.16	0.44	287	539	413	0.88	2.28e-09	523	316	419	-0.69	6.33e-06	AMD1_1025	336.333	6.33333	1009	19
AMD1_1026	Trans-3-hydroxy-L-proline dehydratase	1015164	1016288	1125	3	521	527	524	0.0167	0.94	486	466	476	-0.0583	0.77	452	482	467	0.0778	0.67	AMD1_1026	513	24.6667	1539	74
AMD1_1027	conserved exported protein of unknown function	1016384	1016764	381	2	349	513	431	0.53	0.000189	325	891	608	1.43	1.97e-26	864	469	666	-0.85	1.73e-09	AMD1_1027	499.333	9.66667	1498	29
AMD1_1028	conserved protein of unknown function	1016867	1017397	531	2	88	146	117	0.68	0.0018	82	276	179	1.71	9.98e-17	267	133	200	-0.95	1.15e-06	AMD1_1028	142	15.6667	426	47
AMD1_1029	Copper transport protein YcnJ	1017402	1019045	1644	3	62	117	90	0.85	0.00023	58	251	154	2.08	4.88e-25	243	107	175	-1.14	1.42e-09	AMD1_1029	113.667	197	341	591
AMD1_1030	Cyclic di-GMP phosphodiesterase Gmr	1019082	1021193	2112	-3	2277	2231	2254	-0.0287	0.86	2126	1430	1778	-0.55	0.000282	1387	2038	1712	0.51	0.00052	AMD1_1030	2172.33	69.6667	6517	209
AMD1_1031	protein of unknown function	1021158	1021490	333	3	192	158	175	-0.26	0.25	180	187	183	0.0488	0.85	181	145	163	-0.26	0.21	AMD1_1031	154	525.333	462	1576
AMD1_1032	conserved membrane protein of unknown function	1021451	1022002	552	2	624	525	575	-0.24	0.18	583	481	532	-0.26	0.2	467	480	473	0.0335	0.89	AMD1_1032	511	18	1533	54
AMD1_1033	Acetylpolyamine amidohydrolase	1022008	1023033	1026	-2	89	96	93	0.0849	0.8	83	60	72	-0.42	0.13	59	87	73	0.43	0.0879	AMD1_1033	93.6667	187.667	281	563
AMD1_1034	Ribosomal-protein-alanine acetyltransferase	1023030	1023548	519	-3	120	141	130	0.21	0.41	112	88	100	-0.31	0.21	86	129	107	0.49	0.0188	AMD1_1034	137	18	411	54
AMD1_1035	conserved protein of unknown function	1023656	1024039	384	-1	3087	3870	3478	0.31	0.00965	2882	2469	2676	-0.2	0.43	2394	3535	2964	0.48	0.016	AMD1_1035	3772	26.6667	11316	80
AMD1_1036	Putative secreted protein	1024451	1025206	756	-1	1597	1236	1416	-0.31	0.32	1490	2174	1832	0.48	0.0723	2107	1129	1618	-0.87	3.92e-10	AMD1_1036	1202	46.3333	3606	139
AMD1_1037	protein of unknown function	1025232	1025408	177	-3	817	563	690	-0.31	0.49	762	1015	889	0.26	0.54	984	514	749	-0.9	2.39e-08	AMD1_1037	546.333	508	1639	1524
AMD1_1038	Ceramidase	1025411	1026115	705	2	868	943	906	0.1	0.77	810	1249	1029	0.57	0.0135	1211	862	1036	-0.41	0.0448	AMD1_1038	915.333	73.3333	2746	220
AMD1_1039	AFG1-like ATPase	1026159	1027340	1182	-3	1412	1620	1516	0.19	0.13	1318	1530	1424	0.21	0.15	1484	1479	1482	-0.00452	0.98	AMD1_1039	1579.67	178.333	4739	535
AMD1_1040	Outer membrane lipoprotein omp19 homolog	1027373	1027918	546	-1	1137	1314	1226	0.2	0.2	1062	1148	1105	0.11	0.53	1113	1200	1157	0.0957	0.55	AMD1_1040	1283.67	25.3333	3851	76
AMD1_1041	protein of unknown function	1027488	1028024	537	3	21	16	19	-0.25	0.56	20	16	18	-0.18	0.68	16	15	15	-0.0353	0.9	AMD1_1041	15.6667	863.333	47	2590
AMD1_1042	Diaminopimelate epimerase	1028140	1029024	885	1	1054	948	1001	-0.14	0.48	984	1153	1069	0.21	0.27	1119	867	993	-0.32	0.0614	AMD1_1042	923.333	23	2770	69
AMD1_1043	Threonylcarbamoyladenosine tRNA methylthiotransferase MtaB	1029024	1030307	1284	3	1250	1133	1191	-0.14	0.44	1167	1325	1246	0.17	0.39	1285	1035	1160	-0.27	0.11	AMD1_1043	1102.33	47.6667	3307	143
AMD1_1044	Signal recognition particle receptor FtsY	1030321	1032075	1755	1	1862	1745	1803	-0.0881	0.67	1738	2017	1878	0.2	0.26	1957	1594	1775	-0.27	0.0614	AMD1_1044	1703.67	99.6667	5111	299
AMD1_1045	putative intracellular septation protein A	1032079	1032732	654	1	1137	1012	1074	-0.16	0.42	1061	1161	1111	0.12	0.56	1126	924	1025	-0.26	0.0814	AMD1_1045	987.667	138.333	2963	415
AMD1_1046	conserved protein of unknown function	1032899	1033066	168	2	629	227	428	-1.42	3.11e-10	587	526	557	-0.14	0.63	511	208	359	-1.25	8.57e-11	AMD1_1046	222.667	57.3333	668	172
AMD1_1047	conserved protein of unknown function	1033075	1034130	1056	-2	302	422	362	0.47	0.000664	282	480	381	0.74	1.3e-06	466	385	426	-0.24	0.13	AMD1_1047	411.333	62	1234	186
AMD1_1048	holocytochrome c synthetase - thiol:disulfide oxidoreductase CcmG	1034158	1034736	579	-2	507	856	682	0.73	2.96e-09	474	1541	1008	1.69	3.8e-36	1495	782	1138	-0.91	8.19e-12	AMD1_1048	834	15	2502	45
AMD1_1049	Heme exporter protein D	1034733	1034903	171	-3	525	637	581	0.25	0.27	490	1512	1001	1.58	1.3e-13	1466	582	1024	-1.29	2.63e-13	AMD1_1049	621	5.66667	1863	17
AMD1_1050	heme trafficking system membrane protein CcmB	1035030	1035695	666	-3	238	230	234	-0.048	0.86	223	249	236	0.15	0.49	242	210	226	-0.17	0.34	AMD1_1050	224	8	672	24
AMD1_1051	protein of unknown function	1035726	1035920	195	3	-	-			-	9.83	18	14	0.64	0.13	18	11	14	-0.29	0.25	AMD1_1051	11.3333	263	34	789
AMD1_1052	Cytochrome c biogenesis ATP-binding export protein CcmA	1035939	1036550	612	-3	608	667	638	0.13	0.49	568	767	668	0.42	0.00686	744	609	677	-0.25	0.0982	AMD1_1052	651	10.6667	1953	32
AMD1_1053	protein of unknown function	1036640	1036834	195	-1	36	37	37	0.0229	0.96	34	28	31	-0.23	0.56	27	34	30	0.18	0.48	AMD1_1053	36.3333	0.333333	109	1
AMD1_1054	aconitate hydratase 1	1036835	1039525	2691	2	235	521	378	1.12	2.08e-17	220	573	396	1.36	1.38e-21	555	476	516	-0.2	0.2	AMD1_1054	507	15.3333	1521	46
AMD1_1055	protein of unknown function	1040293	1040493	201	-2	27	19	23	-0.35	0.38	25	21	23	-0.15	0.74	20	17	19	-0.0974	0.71	AMD1_1055	18.3333	35.6667	55	107
AMD1_1056	Malate dehydrogenase	1040722	1041690	969	1	2204	1633	1918	-0.41	0.0121	2058	1800	1929	-0.17	0.58	1746	1491	1619	-0.15	0.52	AMD1_1056	1598	98	4794	294
AMD1_1057	succinyl-CoA synthetase subunit beta	1041702	1042898	1197	3	2397	1846	2122	-0.35	0.05	2239	2227	2233	-0.00659	0.98	2160	1686	1923	-0.29	0.16	AMD1_1057	1808.33	35	5425	105
AMD1_1058	succinyl-CoA synthetase subunit alpha	1042903	1043799	897	1	3322	2462	2892	-0.41	0.00436	3103	2933	3018	-0.0749	0.76	2845	2248	2546	-0.29	0.094	AMD1_1058	2403	21	7209	63
AMD1_1059	subunit of E1(0) component of 2-oxoglutarate dehydrogenase	1043939	1046926	2988	2	5100	3948	4524	-0.35	0.017	4763	4025	4394	-0.23	0.26	3904	3605	3754	-0.0937	0.66	AMD1_1059	3861.33	138.333	11584	415
AMD1_1060	dihydrolipoyltranssuccinylase	1046949	1048214	1266	3	1602	1261	1432	-0.32	0.0698	1496	1249	1373	-0.24	0.2	1211	1152	1181	-0.0597	0.78	AMD1_1060	1234.33	42.6667	3703	128
AMD1_1061	protein of unknown function	1048226	1048564	339	-1	42	55	48	0.32	0.31	39	52	45	0.34	0.29						AMD1_1061	53.3333	1669.33	160	5008
AMD1_1062	conserved exported protein of unknown function	1048320	1048742	423	3	2166	2065	2116	-0.0661	0.69	2023	1637	1830	-0.29	0.11	1587	1886	1737	0.21	0.2	AMD1_1062	2013.33	203	6040	609
AMD1_1063	MAPEG family protein	1048961	1049374	414	2	614	530	572	-0.2	0.23	573	491	532	-0.21	0.19	476	484	480	0.0188	0.93	AMD1_1063	517.333	15.6667	1552	47
AMD1_1064	Putative enzyme related to lactoylglutathione lyase	1049410	1049868	459	1	585	431	508	-0.42	0.00324	546	434	490	-0.32	0.0406	421	394	407	-0.082	0.66	AMD1_1064	421.333	12	1264	36
AMD1_1065	L-lysine permease	1049865	1050509	645	3	863	701	782	-0.29	0.0463	806	642	724	-0.31	0.04	623	640	632	0.0354	0.86	AMD1_1065	684	9.33333	2052	28
AMD1_1066	conserved exported protein of unknown function	1050509	1051003	495	2	513	411	462	-0.3	0.0881	479	434	456	-0.13	0.51	421	375	398	-0.14	0.4	AMD1_1066	399.667	2.66667	1199	8
AMD1_1067	putative NAD(P)-binding oxidoreductase with NAD(P)-binding Rossmann-fold domain	1051000	1051755	756	1	881	641	761	-0.44	0.00489	823	669	746	-0.29	0.0727	648	586	617	-0.13	0.46	AMD1_1067	624	59	1872	177
AMD1_1068	Dihydrolipoyl dehydrogenase	1051785	1053191	1407	3	2157	1912	2035	-0.17	0.32	2015	2066	2040	0.0351	0.86	2004	1746	1875	-0.17	0.27	AMD1_1068	1864.33	47	5593	141
AMD1_1069	conserved protein of unknown function	1053261	1053581	321	-3	270	122	196	-1.07	2.75e-05	252	72	162	-1.76	1.41e-13	70	111	91	0.5	0.0529	AMD1_1069	119.667	10.6667	359	32
AMD1_1070	protein of unknown function	1053293	1053511	219	2	-	-			-	11	6.02	8.4	-0.46	0.31						AMD1_1070	5.66667	68	17	204
AMD1_1071	conserved protein of unknown function	1053799	1054278	480	1	359	653	506	0.79	0.0011	335	1203	769	1.8	4.88e-18	1166	596	881	-0.92	4.28e-08	AMD1_1071	633.667	273.667	1901	821
AMD1_1072	TraB family protein	1054275	1055351	1077	-3	1630	1783	1707	0.13	0.38	1522	1228	1375	-0.3	0.0779	1191	1629	1410	0.41	0.00576	AMD1_1072	1739	97.3333	5217	292
AMD1_1073	Tyrosine recombinase XerC	1055416	1056354	939	-2	301	308	305	0.0316	0.89	281	206	244	-0.42	0.0279	200	281	241	0.44	0.0105	AMD1_1073	300.333	185.667	901	557
AMD1_1074	Ribosome maturation factor RimM	1056411	1057025	615	3	1110	1089	1100	-0.0269	0.89	1037	1228	1132	0.24	0.13	1191	995	1093	-0.23	0.12	AMD1_1074	1060.33	17.3333	3181	52
AMD1_1075	tRNA m(1)G37 methyltransferase	1057025	1057723	699	2	837	801	819	-0.0581	0.78	781	940	861	0.25	0.12	912	732	822	-0.29	0.0548	AMD1_1075	780.333	24.3333	2341	73
AMD1_1076	putative membrane transporter protein	1057735	1058490	756	-2	86	117	102	0.38	0.11	81	151	116	0.85	9.07e-05	146	107	126	-0.37	0.0695	AMD1_1076	114	224	342	672
AMD1_1077	50S ribosomal protein L19	1058835	1059383	549	3	7335	6843	7089	-0.0956	0.63	6851	8649	7750	0.32	0.02	8387	6250	7318	-0.39	0.00305	AMD1_1077	6658.67	69.3333	19976	208
AMD1_1078	amino acid ABC transporter, periplasmic amino acid-binding protein	1059563	1060360	798	2	2000	2479	2239	0.3	0.0268	1868	2028	1948	0.11	0.52	1967	2264	2115	0.18	0.22	AMD1_1078	2419	52	7257	156
AMD1_1079	Putative amino-acid permease protein YxeN	1060596	1061411	816	3	517	599	558	0.2	0.34	483	525	504	0.11	0.62	509	547	528	0.088	0.62	AMD1_1079	584.667	12.3333	1754	37
AMD1_1080	dTDP-3-amino-3,6-dideoxy-alpha-D-glucopyranose N,N-dimethyltransferase	1061408	1062043	636	2	281	291	286	0.0461	0.87	263	298	280	0.16	0.53	289	266	277	-0.0915	0.67	AMD1_1080	283	4.66667	849	14
AMD1_1081	Protein MgtC	1062104	1062652	549	2	141	97	119	-0.49	0.0256	131	110	121	-0.24	0.33	106	89	98	-0.19	0.41	AMD1_1081	95	10.3333	285	31
AMD1_1082	3-isopropylmalate dehydratase subunit LeuC	1063007	1064416	1410	2	6799	8909	7854	0.38	0.00228	6349	6276	6313	-0.0159	0.95	6087	8136	7111	0.38	0.0148	AMD1_1082	8706.67	92.3333	26120	277
AMD1_1083	Putative diguanylate cyclase YdaM	1064583	1065794	1212	3	3646	3041	3343	-0.25	0.13	3404	2191	2798	-0.61	0.000586	2124	2778	2451	0.33	0.0644	AMD1_1083	2956	108.667	8868	326
AMD1_1084	conserved exported protein of unknown function	1065801	1066157	357	-3	324	380	352	0.21	0.29	303	232	268	-0.36	0.0511	225	347	286	0.57	0.000516	AMD1_1084	371.333	283.667	1114	851
AMD1_1085	Succinate dehydrogenase cytochrome b556 subunit	1066579	1066995	417	1	1046	2904	1975	1.46	3.4e-31	976	3947	2462	2	6.57e-40	3828	2652	3240	-0.49	0.00146	AMD1_1085	2838.33	70.3333	8515	211
AMD1_1086	Succinate dehydrogenase hydrophobic membrane anchor protein	1066997	1067395	399	2	518	1974	1246	1.91	6.88e-50	484	2511	1497	2.36	1.32e-52	2435	1802	2119	-0.38	0.0195	AMD1_1086	1930.67	29	5792	87
AMD1_1087	succinate:quinone oxidoreductase, FAD binding protein	1067400	1069235	1836	3	2739	8631	5685	1.65	1.24e-63	2557	11600	7078	2.17	1.06e-53	11200	7883	9566	-0.47	0.00146	AMD1_1087	8424.33	88	25273	264
AMD1_1088	conserved protein of unknown function	1069239	1069682	444	3	1236	3515	2376	1.49	1.14e-37	1154	4757	2956	2.03	1.91e-47	4615	3210	3913	-0.49	0.00013	AMD1_1088	3429.67	31.3333	10289	94
AMD1_1089	succinate:quinone oxidoreductase, iron-sulfur cluster binding protein	1069693	1070472	780	1	1557	4283	2920	1.44	7.11e-28	1453	4936	3195	1.74	1.1e-31	4787	3912	4350	-0.26	0.0751	AMD1_1089	4184.67	44.3333	12554	133
AMD1_1090	Glycosyltransferase EpsF	1070483	1071616	1134	2	757	2038	1397	1.41	1.17e-31	706	2804	1755	1.97	5.89e-46	2719	1862	2291	-0.52	3.91e-05	AMD1_1090	1985.33	100.333	5956	301
AMD1_1091	conserved protein of unknown function	1071653	1072300	648	2	514	1223	869	1.23	5.44e-23	480	1575	1027	1.69	5.8e-25	1527	1117	1322	-0.4	0.0189	AMD1_1091	1189.33	11.3333	3568	34
AMD1_1092	Leucine dehydrogenase	1072417	1073535	1119	-2	29	39	34	0.32	0.37	27	43	35	0.5	0.17	42	35	39	-0.1	0.7	AMD1_1092	38	62	114	186
AMD1_1093	protein of unknown function	1073623	1073916	294	1																AMD1_1093	2.66667	6.66667	8	20
AMD1_1094	Virulence regulon transcriptional activator VirF	1074115	1075086	972	1	20	16	18	-0.2	0.65	19	21	20	0.0861	0.86	20	15	18	-0.16	0.53	AMD1_1094	16	92.6667	48	278
AMD1_1095	Peroxiredoxin OsmC	1075120	1075545	426	-2	286	334	310	0.21	0.28	267	301	284	0.16	0.52	292	305	298	0.0512	0.83	AMD1_1095	326.333	13.6667	979	41
AMD1_1096	protein of unknown function	1075595	1075972	378	-1	22	31	26	0.38	0.32	20	50	35	1.17	0.000851	49	28	38	-0.57	0.0422	AMD1_1096	30	18.3333	90	55
AMD1_1097	2-octaprenyl-6-methoxyphenol hydroxylase	1076257	1077516	1260	-2	257	342	299	0.39	0.0128	240	452	346	0.89	1.93e-08	438	312	375	-0.44	0.00453	AMD1_1097	334	46.6667	1002	140
AMD1_1098	acyl-CoA thioesterase II	1077609	1078481	873	3	591	635	613	0.0989	0.54	552	676	614	0.28	0.0855	656	580	618	-0.16	0.35	AMD1_1098	618.667	26.6667	1856	80
AMD1_1099	nitrogen regulatory protein PII-1	1078703	1079041	339	2	26	16	21	-0.49	0.24	25	19	22	-0.26	0.54	19	15	17	-0.1	0.67	AMD1_1099	15.6667	5.33333	47	16
AMD1_1100	ammonia/ammonium transporter	1079072	1080454	1383	2	111	66	88	-0.66	0.0105	103	81	92	-0.31	0.29	79	60	70	-0.26	0.26	AMD1_1100	64.3333	39.3333	193	118
AMD1_1101	conserved protein of unknown function	1080583	1081002	420	-2	203	104	153	-0.9	0.000337	189	91	140	-0.99	0.000236	88	95	91	0.0831	0.74	AMD1_1101	101.333	20	304	60
AMD1_1102	conserved exported protein of unknown function	1081147	1081398	252	-2	1049	174	611	-2.55	4.5e-24	979	176	577	-2.28	8.24e-06	171	159	165	-0.0577	0.84	AMD1_1102	170.667	9.33333	512	28
AMD1_1103	conserved protein of unknown function	1081539	1081760	222	-3	-	-			-	11	20	16	0.64	0.13	20	12	16	-0.31	0.24	AMD1_1103	12.6667	17.6667	38	53
AMD1_1104	conserved protein of unknown function	1082051	1082971	921	2	93	114	104	0.27	0.25	87	82	84	-0.0733	0.81	80	104	92	0.31	0.15	AMD1_1104	111.667	20	335	60
AMD1_1105	DNA translocase FtsK	1083097	1085742	2646	1	4448	3989	4218	-0.15	0.34	4153	3663	3908	-0.17	0.26	3553	3643	3598	0.0317	0.87	AMD1_1105	3881.33	54	11644	162
AMD1_1106	Outer-membrane lipoprotein carrier protein	1085862	1086521	660	3	3117	2083	2600	-0.55	0.000443	2910	2817	2864	-0.0431	0.88	2731	1903	2317	-0.45	0.0182	AMD1_1106	2030.67	61.3333	6092	184
AMD1_1107	Exodeoxyribonuclease III	1086788	1087594	807	2	808	661	735	-0.27	0.0771	755	763	759	0.0172	0.93	740	604	672	-0.26	0.0991	AMD1_1107	643.333	62.3333	1930	187
AMD1_1108	cAMP-binding proteins - catabolite gene activator and regulatory subunit of cAMP-dependent protein kinases	1087681	1088136	456	-2	1940	1889	1915	-0.0381	0.82	1812	2004	1908	0.14	0.35	1943	1725	1834	-0.16	0.25	AMD1_1108	1840	77.3333	5520	232
AMD1_1109	DNA-binding response regulator	1088210	1088893	684	-1	3617	2702	3159	-0.41	0.00171	3377	3426	3401	0.0207	0.92	3322	2467	2895	-0.39	0.0066	AMD1_1109	2631.33	74.6667	7894	224
AMD1_1110	L,D-transpeptidase catalytic domain	1089041	1089571	531	2	387	316	351	-0.27	0.15	362	309	335	-0.21	0.44	300	288	294	-0.0361	0.89	AMD1_1110	306.667	6.33333	920	19
AMD1_1111	conserved protein of unknown function	1089674	1089922	249	-1	37	68	53	0.77	0.0101	35	153	94	2.09	6.97e-15	148	62	105	-1.19	1.59e-07	AMD1_1111	66	162.333	198	487
AMD1_1112	Gcv operon activator	1090057	1090974	918	1	253	280	266	0.14	0.5	236	248	242	0.0564	0.86	241	256	248	0.0641	0.8	AMD1_1112	272.667	20.6667	818	62
AMD1_1113	Ribosomal protein L11 methyltransferase	1090981	1091652	672	-2	322	300	311	-0.0939	0.68	301	298	299	-0.015	0.96	289	274	281	-0.0594	0.78	AMD1_1113	293	60.6667	879	182
AMD1_1114	EVE domain protein	1091649	1092083	435	-3	444	419	431	-0.0743	0.78	414	421	418	0.023	0.93	408	383	395	-0.0752	0.74	AMD1_1114	410	10.3333	1230	31
AMD1_1115	Protein YciI	1092104	1092400	297	-1	362	333	348	-0.11	0.63	338	309	323	-0.12	0.62	300	304	302	0.0158	0.95	AMD1_1115	325.333	23.6667	976	71
AMD1_1116	Glycerol-3-phosphate dehydrogenase [NAD(P)+]	1092421	1093404	984	-2	329	264	296	-0.3	0.062	307	351	329	0.18	0.38	341	241	291	-0.44	0.01	AMD1_1116	256.667	10.6667	770	32
AMD1_1117	tRNA N6-adenosine threonylcarbamoyltransferase	1093401	1094507	1107	-3	513	405	459	-0.33	0.0248	479	520	500	0.12	0.52	505	370	437	-0.41	0.00568	AMD1_1117	395.333	22	1186	66
AMD1_1118	hydroxymethylbilane synthase	1094585	1095514	930	2	948	1019	983	0.0974	0.64	885	1767	1326	0.98	1e-13	1714	931	1322	-0.84	1.44e-08	AMD1_1118	991	22.6667	2973	68
AMD1_1119	Uroporphyrinogen-III synthase	1095515	1096231	717	2	301	375	338	0.3	0.0739	281	555	418	0.96	2.2e-10	539	343	441	-0.61	5.34e-05	AMD1_1119	365	13.6667	1095	41
AMD1_1120	Putative phage tail protein	1096353	1097723	1371	3	1790	1468	1629	-0.28	0.0226	1672	1691	1681	0.0158	0.93	1640	1341	1490	-0.27	0.046	AMD1_1120	1429.33	14	4288	42
AMD1_1121	Homolog of E. coli HemY protein	1097734	1099314	1581	1	2316	1810	2063	-0.35	0.000904	2163	1981	2072	-0.12	0.41	1921	1653	1787	-0.2	0.13	AMD1_1121	1763.33	35	5290	105
AMD1_1122	Tellurite resistance protein	1099363	1099842	480	1	1026	704	865	-0.53	5.3e-06	958	753	856	-0.33	0.0199	731	643	687	-0.16	0.27	AMD1_1122	686.667	8.33333	2060	25
AMD1_1123	Glutamine amidotransferase	1099850	1100572	723	2	983	720	851	-0.43	0.000817	918	772	845	-0.24	0.12	749	658	703	-0.16	0.29	AMD1_1123	700.667	52.6667	2102	158
AMD1_1124	Enterobactin exporter EntS	1100615	1101856	1242	-1	87	102	94	0.2	0.49	81	133	107	0.66	0.0033	129	93	111	-0.39	0.0572	AMD1_1124	99	115.667	297	347
AMD1_1125	protein of unknown function	1101706	1102023	318	1	13	12	12	-0.00763	0.99	12	16	14	0.23	0.6	15	11	13	-0.11	0.65	AMD1_1125	12	21.6667	36	65
AMD1_1126	conserved exported protein of unknown function	1102026	1102454	429	-3	81	36	59	-1.06	0.00163	76	34	55	-1.07	0.00154	32	33	33	0.00863	0.98	AMD1_1126	34.6667	8	104	24
AMD1_1127	protein of unknown function	1102451	1102630	180	-1																AMD1_1127	5	4	15	12
AMD1_1128	O-acetyltransferase OatA	1102711	1104693	1983	1	76	61	68	-0.26	0.44	71	85	78	0.2	0.57	82	56	69	-0.4	0.12	AMD1_1128	59.3333	81.3333	178	244
AMD1_1129	Putative sugar isomerase YihS	1104723	1105988	1266	-3	400	386	393	-0.046	0.83	373	344	359	-0.11	0.58	333	353	343	0.068	0.72	AMD1_1129	376.667	25	1130	75
AMD1_1130	protein of unknown function	1105901	1106266	366	2	161	130	145	-0.27	0.34	151	233	192	0.6	0.000728	226	118	172	-0.85	0.000178	AMD1_1130	125.333	101.667	376	305
AMD1_1131	Fatty acid desaturase	1106205	1107299	1095	3	1375	1271	1323	-0.11	0.57	1284	1704	1494	0.39	0.00514	1652	1161	1407	-0.47	0.000514	AMD1_1131	1237	41.3333	3711	124
AMD1_1132	protein of unknown function	1107663	1107833	171	3	50	31	40	-0.54	0.15	46	53	50	0.14	0.74	52	28	40	-0.64	0.0351	AMD1_1132	30	10.6667	90	32
AMD1_1133	Transcriptional regulator BetI	1107815	1108402	588	2	147	92	119	-0.52	0.17	137	172	155	0.25	0.5	167	84	125	-0.92	2.39e-05	AMD1_1133	89.6667	19	269	57
AMD1_1134	multidrug efflux pump membrane fusion lipoprotein AcrA	1108482	1109699	1218	3	106	100	103	-0.0675	0.86	99	175	137	0.73	0.0113	170	91	130	-0.79	0.00119	AMD1_1134	98	36.6667	294	110
AMD1_1135	multidrug efflux pump RND permease AcrB	1109712	1112855	3144	3	376	330	353	-0.16	0.63	351	590	470	0.68	0.00709	572	301	437	-0.88	2.26e-07	AMD1_1135	321.667	86.6667	965	260
AMD1_1136	TetR family transcriptional regulator	1112852	1113310	459	2	72	61	67	-0.2	0.55	68	107	87	0.59	0.024	103	56	80	-0.79	0.000617	AMD1_1136	59.6667	6	179	18
AMD1_1137	L-proline glycine betaine ABC transport system permease protein ProW (TC 3.A.1.12.1)	1113353	1115341	1989	-1	69	82	75	0.21	0.48	64	49	57	-0.33	0.3	47	74	61	0.49	0.0588	AMD1_1137	79.6667	77.3333	239	232
AMD1_1138	Glycine betaine/proline betaine transport system ATP-binding protein ProV	1115338	1116366	1029	-2	18	18	18	-0.0435	0.93	17	16	17	-0.0645	0.9	16	16	16	0.0136	0.97	AMD1_1138	17.3333	12	52	36
AMD1_1139	L-proline glycine betaine binding ABC transporter protein ProX (TC 3.A.1.12.1)	1116471	1117424	954	-3	73	75	74	0.0317	0.94	69	56	62	-0.26	0.41	54	69	61	0.22	0.37	AMD1_1139	73.6667	20.3333	221	61
AMD1_1140	protein of unknown function	1117180	1117611	432	-2	42	42	42	-0.0122	0.98	39	38	39	-0.0381	0.92	37	38	37	0.022	0.94	AMD1_1140	40.6667	626	122	1878
AMD1_1141	DNA-binding transcriptional dual regulator TorR	1117610	1118344	735	2	756	805	781	0.083	0.7	706	585	645	-0.26	0.13	567	735	651	0.33	0.0444	AMD1_1141	784.667	36.6667	2354	110
AMD1_1142	Sensor protein torS	1118360	1121293	2934	-1	462	484	473	0.0629	0.77	432	288	360	-0.56	0.00212	280	442	361	0.61	0.000383	AMD1_1142	471	140.333	1413	421
AMD1_1143	Periplasmic protein TorT	1121332	1122414	1083	1	326	345	335	0.0782	0.73	304	238	271	-0.33	0.11	230	315	273	0.39	0.034	AMD1_1143	335.667	20.3333	1007	61
AMD1_1144	Aminomethyltransferase	1122545	1124914	2370	2	36	37	37	0.0149	0.98	34	22	28	-0.52	0.16	21	34	27	0.38	0.16	AMD1_1144	35.6667	6.33333	107	19
AMD1_1145	Methionyl-tRNA formyltransferase	1125011	1125994	984	-1	25	62	43	1.22	0.000338	23	367	195	3.66	6.2e-06	355	57	206	-2.17	0.00198	AMD1_1145	60.6667	10.6667	182	32
AMD1_1146	Putative aldehyde dehydrogenase DhaS	1126109	1127563	1455	-1	48	139	94	1.47	6.11e-10	45	1177	611	4.49	2.73e-10	1139	127	633	-2.83	5.74e-05	AMD1_1146	136.333	66	409	198
AMD1_1147	protein of unknown function	1127587	1127712	126	-2	-	-			-	4.25	152	78	4.89	8.1e-09	147	13	80	-3.19	2.17e-05	AMD1_1147	13.6667	4	41	12
AMD1_1148	Putative molybdopterin biosynthesis protein MoeA/LysR substrate binding-domain-containing protein	1127795	1128871	1077	2	277	488	382	0.79	4.89e-07	259	489	374	0.87	3.98e-05	474	445	460	-0.0684	0.76	AMD1_1148	475.333	43.6667	1426	131
AMD1_1149	protein of unknown function	1128819	1129037	219	3	90	132	111	0.51	0.0294	84	134	109	0.58	0.0525	129	121	125	-0.0572	0.84	AMD1_1149	128.333	78	385	234
AMD1_1150	conserved membrane protein of unknown function	1129012	1129386	375	-2	122	120	121	-0.02	0.96	114	121	117	0.0699	0.83	117	110	114	-0.0604	0.82	AMD1_1150	116.667	79	350	237
AMD1_1151	conserved protein of unknown function	1129610	1129834	225	-1	21	16	19	-0.25	0.56	20	16	18	-0.18	0.69	16	15	15	-0.0384	0.89	AMD1_1151	15.6667	21.6667	47	65
AMD1_1152	Opacity protein antigen	1130321	1131043	723	2	134	137	135	0.0258	0.94	125	227	176	0.79	0.00138	220	125	173	-0.71	0.002	AMD1_1152	133.333	142.333	400	427
AMD1_1153	DNA-binding transcriptional activator FeaR	1131131	1132204	1074	-1	954	955		0.00157	1	891	751	821	-0.24	0.19	728	873	800	0.23	0.17	AMD1_1153	930.333	36	2791	108
AMD1_1154	Integrase	1132625	1133860	1236	2	818	695	757	-0.22	0.21	764	620	692	-0.29	0.0723	601	635	618	0.0689	0.72	AMD1_1154	680	36	2040	108
AMD1_1155	conserved protein of unknown function	1133955	1134779	825	3	646	632	639	-0.0299	0.89	603	510	557	-0.23	0.19	494	577	536	0.19	0.27	AMD1_1155	617.667	35.6667	1853	107
AMD1_1156	Helix-turn-helix domain protein	1134932	1135102	171	2	24	39	32	0.55	0.096	23	39	31	0.66	0.051	38	36	37	-0.0503	0.86	AMD1_1156	38	23.3333	114	70
AMD1_1157	conserved protein of unknown function	1135112	1135327	216	2	17	23	20	0.29	0.49	16	19	17	0.2	0.64	19	21	20	0.0619	0.82	AMD1_1157	22	164.333	66	493
AMD1_1158	conserved protein of unknown function	1135324	1135626	303	1	29	26	28	-0.11	0.8	27	27		-2.86e-05	1	26	24	25	-0.0651	0.81	AMD1_1158	25.3333	16.6667	76	50
AMD1_1159	PC4 domain-containing protein	1135623	1135862	240	3	230	220	225	-0.0594	0.82	215	243	229	0.17	0.44	236	201	218	-0.19	0.3	AMD1_1159	214.333	42	643	126
AMD1_1160	conserved protein of unknown function	1135879	1136358	480	1	104	115	109	0.12	0.68	97	95	96	-0.0193	0.96	93	105	99	0.12	0.59	AMD1_1160	111.667	190.667	335	572
AMD1_1161	protein of unknown function	1136614	1136826	213	1	118	138	128	0.2	0.43	111	157	134	0.47	0.03	152	126	139	-0.22	0.27	AMD1_1161	134.667	144.667	404	434
AMD1_1162	M.CcrMI ortholog	1136834	1138759	1926	-1	2426	1826	2126	-0.4	0.000443	2265	1270	1768	-0.82	3.99e-12	1231	1668	1449	0.41	0.00139	AMD1_1162	1778.33	1014.33	5335	3043
AMD1_1163	conserved protein of unknown function	1138758	1138913	156	3	31	21	26	-0.39	0.31	29	20	25	-0.39	0.3	20	19	20	-0.0123	0.97	AMD1_1163	20.3333	3.66667	61	11
AMD1_1164	conserved protein of unknown function	1138910	1139122	213	2	-	-			-	14	10	12	-0.27	0.54	9.73	7.83	8.78	-0.0742	0.75	AMD1_1164	8.33333	11.3333	25	34
AMD1_1165	protein of unknown function	1139109	1139321	213	3	22	14	18	-0.45	0.27	21	14	17	-0.43	0.29	13	13	13	-0.0111	0.97	AMD1_1165	13.6667	21	41	63
AMD1_1166	conserved protein of unknown function	1139321	1140001	681	2	160	138	149	-0.2	0.4	149	128	139	-0.21	0.38	124	126	125	0.018	0.94	AMD1_1166	134.333	93.3333	403	280
AMD1_1167	protein of unknown function	1140209	1140499	291	2	108	76	92	-0.44	0.0639	101	73	87	-0.43	0.0894	70	70	70	-0.00342	0.99	AMD1_1167	74.3333	31.6667	223	95
AMD1_1168	protein of unknown function	1140496	1140720	225	1	58	48	53	-0.22	0.55	54	36	45	-0.51	0.0971	35	44	39	0.18	0.48	AMD1_1168	46.3333	13.6667	139	41
AMD1_1169	protein of unknown function	1140720	1140989	270	3	49	39	44	-0.23	0.54	45	32	39	-0.39	0.26	31	36	34	0.0972	0.72	AMD1_1169	38.3333	40.3333	115	121
AMD1_1170	DNA topoisomerase II	1141011	1141265	255	3	40	26	33	-0.49	0.14	37	29	33	-0.29	0.41	28	24	26	-0.11	0.68	AMD1_1170	25.6667	45	77	135
AMD1_1171	protein of unknown function	1141262	1141531	270	-1	72	59	65	-0.25	0.42	67	60	64	-0.14	0.66	58	54	56	-0.07	0.79	AMD1_1171	57.3333	32	172	96
AMD1_1172	conserved protein of unknown function	1141778	1142911	1134	-1	697	741	719	0.0847	0.61	651	564	608	-0.2	0.21	547	677	612	0.28	0.0465	AMD1_1172	722	155.667	2166	467
AMD1_1173	conserved protein of unknown function	1142965	1143213	249	-2	293	277	285	-0.0747	0.75	273	198	236	-0.43	0.0262	192	253	223	0.33	0.0767	AMD1_1173	270	35.6667	810	107
AMD1_1174	conserved protein of unknown function	1143231	1143743	513	-3	563	561	562	-0.00594	0.98	526	389	458	-0.42	0.00757	377	512	445	0.4	0.00739	AMD1_1174	546	72	1638	216
AMD1_1175	protein of unknown function	1143765	1144052	288	-3	57	53	55	-0.0963	0.8	54	57	55	0.0735	0.84	55	48	52	-0.12	0.65	AMD1_1175	51.3333	10.6667	154	32
AMD1_1176	protein of unknown function	1144088	1144267	180	2	14	15	15	0.0461	0.93	13	15	14	0.0765	0.87	14	14	14	-0.0079	0.98	AMD1_1176	15	161	45	483
AMD1_1177	conserved protein of unknown function	1144305	1144550	246	3	56	57	57	0.0281	0.94	52	71	62	0.39	0.17	69	52	61	-0.29	0.22	AMD1_1177	56	21.3333	168	64
AMD1_1178	conserved protein of unknown function	1144547	1144939	393	2	48	50	49	0.0374	0.92	45	67	56	0.49	0.0975	65	46	55	-0.36	0.14	AMD1_1178	49	384.667	147	1154
AMD1_1179	conserved protein of unknown function	1144996	1145202	207	-2	925	879	902	-0.0703	0.73	863	701	782	-0.28	0.13	680	803	741	0.2	0.23	AMD1_1179	858.333	31.3333	2575	94
AMD1_1180	protein of unknown function	1145213	1145398	186	-1	279	314	297	0.15	0.48	261	309	285	0.23	0.29	300	286	293	-0.0529	0.82	AMD1_1180	306.667	32.6667	920	98
AMD1_1181	protein of unknown function	1145384	1145557	174	2	44	32	38	-0.35	0.33	41	40	40	-0.0363	0.93	38	29	34	-0.22	0.38	AMD1_1181	30.6667	213.333	92	640
AMD1_1182	Succinoglycan biosynthesis protein ExoI	1145593	1146084	492	-2	209	197	203	-0.0769	0.78	195	200	198	0.0319	0.91	194	180	187	-0.0872	0.68	AMD1_1182	192	10	576	30
AMD1_1183	protein of unknown function	1146084	1146323	240	-3	331	336	333	0.0239	0.92	309	283	296	-0.12	0.57	274	307	291	0.13	0.46	AMD1_1183	328	3.33333	984	10
AMD1_1184	protein of unknown function	1146304	1146435	132	-2	251	265	258	0.075	0.76	234	226	230	-0.0412	0.88	219	242	231	0.11	0.6	AMD1_1184	258.333	5.33333	775	16
AMD1_1185	protein of unknown function	1146435	1146896	462	-3	595	597	596	0.00548	0.98	555	503	529	-0.13	0.53	488	545	517	0.13	0.49	AMD1_1185	581	33	1743	99
AMD1_1186	conserved protein of unknown function	1147068	1147310	243	-3	331	279	305	-0.23	0.22	309	247	278	-0.3	0.12	240	255	247	0.0662	0.76	AMD1_1186	272.333	8.33333	817	25
AMD1_1187	conserved protein of unknown function	1147453	1147731	279	1	45	37	41	-0.23	0.54	42	31	36	-0.35	0.33	30	34	32	0.0745	0.79	AMD1_1187	35.6667	18	107	54
AMD1_1188	conserved protein of unknown function	1147781	1148212	432	2	17	16	16	-0.0551	0.91	16	20	18	0.25	0.55	20	14	17	-0.19	0.47	AMD1_1188	15.3333	18.3333	46	55
AMD1_1189	conserved protein of unknown function	1148215	1148652	438	1	325	304	315	-0.0907	0.74	304	261	282	-0.21	0.32	253	277	265	0.1	0.64	AMD1_1189	295	3.66667	885	11
AMD1_1190	conserved protein of unknown function	1148649	1148882	234	3	13	18	16	0.27	0.53	12	12	12	-0.0103	0.98	12	17	14	0.17	0.5	AMD1_1190	17.6667	1.66667	53	5
AMD1_1191	conserved exported protein of unknown function	1148879	1149199	321	2	20	14	17	-0.32	0.44	18	18	18	-0.00875	0.99	18	13	15	-0.18	0.48	AMD1_1191	13.6667	22.6667	41	68
AMD1_1192	conserved protein of unknown function	1149196	1149489	294	1	81	82	81	0.0034	0.99	76	76	76	0.00312	0.99	74	75	74	0.00904	0.98	AMD1_1192	79.3333	10.3333	238	31
AMD1_1193	Excisionase	1149939	1150229	291	3	84	43	63	-0.8	0.0248	78	83	81	0.0775	0.84	81	39	60	-0.89	0.00209	AMD1_1193	42	14.3333	126	43
AMD1_1194	exported protein of unknown function	1150480	1150608	129	-2	-	-			-	9.68	10	9.98	0.0558	0.91	9.97	9.29	9.63	-0.0287	0.91	AMD1_1194	10	180.667	30	542
AMD1_1195	protein of unknown function	1150687	1151079	393	1	1153	912	1033	-0.32	0.015	1077	477	777	-1.15	1.11e-13	462	833	648	0.81	2.25e-07	AMD1_1195	888.667	34.6667	2666	104
AMD1_1196	conserved exported protein of unknown function	1151060	1151425	366	-1	974	1014	994	0.0529	0.83	909	633	771	-0.49	0.0194	614	927	770	0.54	0.00248	AMD1_1196	987.667	259.333	2963	778
AMD1_1197	protein of unknown function	1151531	1151737	207	2	25	23	24	-0.094	0.83	24	21	23	-0.11	0.81	21	21	21	0.0086	0.98	AMD1_1197	22.3333	232	67	696
AMD1_1198	protein of unknown function	1151723	1151980	258	-1	19	17	18	-0.11	0.81	17	20	18	0.0973	0.84	19	15	17	-0.12	0.63	AMD1_1198	16	602.667	48	1808
AMD1_1199	conserved protein of unknown function	1151992	1152282	291	1	1045	1491	1268	0.5	7.27e-06	975	1294	1135	0.39	0.0363	1255	1361	1308	0.094	0.64	AMD1_1199	1455	40.6667	4365	122
AMD1_1200	conserved protein of unknown function	1152293	1152613	321	2	526	630	578	0.25	0.0763	491	684	588	0.45	0.00618	664	575	619	-0.17	0.31	AMD1_1200	614.667	7.33333	1844	22
AMD1_1201	conserved exported protein of unknown function	1152716	1153321	606	2	329	336	332	0.0254	0.92	307	285	296	-0.1	0.67	276	307	292	0.12	0.56	AMD1_1201	326.333	432.667	979	1298
AMD1_1202	inorganic pyrophosphatase	1153385	1153918	534	-1	2527	2594	2561	0.0361	0.85	2360	3742	3051	0.64	8.91e-05	3629	2369	2999	-0.57	0.000404	AMD1_1202	2533.33	55.6667	7600	167
AMD1_1203	Histone acetyltransferase HPA2 and related acetyltransferases	1154034	1154540	507	-3	929	1387	1158	0.55	0.000307	867	1139	1003	0.37	0.058	1105	1267	1186	0.17	0.34	AMD1_1203	1353.33	23	4060	69
AMD1_1204	TPM_phosphatase domain-containing protein	1154681	1155319	639	-1	289	325	307	0.16	0.46	270	251	260	-0.0998	0.68	243	297	270	0.23	0.22	AMD1_1204	316.667	49.6667	950	149
AMD1_1205	TPM_phosphatase domain-containing protein	1155326	1156168	843	-1	559	536	548	-0.0583	0.78	522	476	499	-0.13	0.49	462	489	475	0.0738	0.69	AMD1_1205	521.667	83.6667	1565	251
AMD1_1206	LemA family protein	1156391	1157026	636	-1	630	800	715	0.33	0.0109	589	600	594	0.0271	0.9	582	730	656	0.29	0.0627	AMD1_1206	781	39	2343	117
AMD1_1207	conserved protein of unknown function	1157130	1157387	258	3	538	594	566	0.13	0.47	502	483	493	-0.0512	0.88	469	542	505	0.15	0.54	AMD1_1207	577.333	7.66667	1732	23
AMD1_1208	Pyridoxal kinase	1157392	1158279	888	1	323	379	351	0.22	0.24	301	292	296	-0.0463	0.85	283	346	315	0.25	0.14	AMD1_1208	369	33	1107	99
AMD1_1209	conserved protein of unknown function	1158276	1159028	753	3	248	251	249	0.0158	0.96	232	202	217	-0.19	0.45	195	229	212	0.18	0.38	AMD1_1209	244	7	732	21
AMD1_1210	SnoaL-like domain protein	1159056	1159460	405	3	172	165	168	-0.0541	0.84	160	131	146	-0.27	0.25	127	150	139	0.19	0.35	AMD1_1210	160.667	22	482	66
AMD1_1211	Bcr/CflA family efflux transporter	1159463	1160719	1257	-1	104	152	128	0.51	0.00771	97	122	109	0.31	0.22	118	139	129	0.16	0.46	AMD1_1211	148	49.6667	444	149
AMD1_1212	Salmolysin	1160716	1161192	477	-2	52	58	55	0.11	0.76	49	65	57	0.36	0.23	63	53	58	-0.17	0.48	AMD1_1212	56.6667	7.33333	170	22
AMD1_1213	Peptidyl-dipeptidase dcp	1161323	1163377	2055	2	1178	1085	1131	-0.11	0.57	1100	1100	1100	0.00164	0.99	1067	991	1029	-0.0866	0.68	AMD1_1213	1061.33	45.6667	3184	137
AMD1_1214	Ketopantoate hydroxymethyltransferase	1163410	1164369	960	1	747	634	691	-0.23	0.11	698	702	700	0.00902	0.97	680	579	630	-0.21	0.18	AMD1_1214	618.333	11.3333	1855	34
AMD1_1215	ribosome-dependent GTPase, ribosome assembly factor	1164502	1166322	1821	1	6325	6327		0.0037	1	5906	8202	7054	0.45	0.0012	7952	5779	6866	-0.42	0.00236	AMD1_1215	6163.67	174.333	18491	523
AMD1_1216	YCII-related domain protein	1166399	1166713	315	-1	341	256	298	-0.37	0.12	318	286	302	-0.14	0.62	277	234	256	-0.19	0.36	AMD1_1216	249	25.3333	747	76
AMD1_1217	Leucine efflux protein	1166917	1167528	612	1	312	315	314	0.0103	0.98	292	154	223	-0.89	1.57e-05	149	288	218	0.88	4.12e-05	AMD1_1217	308	44	924	132
AMD1_1218	NAD-specific glutamate dehydrogenase	1167717	1172501	4785	3	4528	4509	4519	-0.00625	0.98	4229	3816	4022	-0.14	0.3	3701	4119	3910	0.14	0.31	AMD1_1218	4395.67	125.667	13187	377
AMD1_1219	Major facilitator superfamily MFS_1	1172619	1173992	1374	3	997	922	959	-0.11	0.58	931	832	881	-0.15	0.38	806	842	824	0.0546	0.75	AMD1_1219	899	129	2697	387
AMD1_1220	bifunctional AICAR transformylase/IMP cyclohydrolase	1174196	1175812	1617	-1	378	389	383	0.0383	0.89	353	424	389	0.25	0.2	412	355	383	-0.18	0.36	AMD1_1220	380.667	74.6667	1142	224
AMD1_1221	Heparinase II/III-like	1176006	1177727	1722	-3	665	755	710	0.17	0.32	621	679	650	0.12	0.59	658	689	674	0.0545	0.8	AMD1_1221	736	88.6667	2208	266
AMD1_1222	16S rRNA m(5)C 967 methyltransferase	1177815	1179257	1443	-3	334	385	359	0.19	0.31	312	364	338	0.21	0.22	353	351	352	-0.0057	0.98	AMD1_1222	376.333	299	1129	897
AMD1_1223	Protease HtpX homolog	1179215	1180234	1020	-1	498	482	490	-0.0431	0.88	465	397	431	-0.21	0.32	385	440	412	0.15	0.49	AMD1_1223	472.333	102.667	1417	308
AMD1_1224	conserved protein of unknown function	1180341	1180553	213	3	493	440	466	-0.15	0.48	460	391	426	-0.22	0.23	379	402	390	0.0669	0.74	AMD1_1224	427.333	4.66667	1282	14
AMD1_1225	PepSY domain-containing protein	1180644	1180910	267	3	476	438	457	-0.11	0.67	445	385	415	-0.19	0.35	373	400	387	0.0802	0.7	AMD1_1225	425.667	46.6667	1277	140
AMD1_1226	Flp pilus assembly protein TadG	1181221	1182630	1410	1	43	31	37	-0.38	0.28	40	44	42	0.11	0.77	43	28	36	-0.4	0.13	AMD1_1226	30.3333	157	91	471
AMD1_1227	acetyl-CoA synthetase (AMP-forming)	1182962	1184917	1956	-1	5604	6176	5890	0.13	0.53	5235	5447	5341	0.0529	0.83	5281	5640	5460	0.0766	0.69	AMD1_1227	6034.33	179.333	18103	538
AMD1_1228	Protein usg	1185231	1185503	273	3	291	139	215	-0.98	0.000337	272	161	217	-0.68	0.012	156	127	142	-0.23	0.25	AMD1_1228	135.667	9.33333	407	28
AMD1_1229	conserved protein of unknown function	1185605	1186732	1128	2	525	509	517	-0.0446	0.84	490	447	469	-0.13	0.5	434	465	449	0.0848	0.66	AMD1_1229	495	17	1485	51
AMD1_1230	branched chain amino acid/phenylalanine ABC transporter periplasmic binding protein	1186896	1188002	1107	3	3343	4021	3682	0.25	0.14	3123	5872	4497	0.88	1.24e-07	5693	3673	4683	-0.6	2.32e-05	AMD1_1230	3915.67	65.3333	11747	196
AMD1_1231	Pyridoxal phosphate homeostasis protein	1188083	1188745	663	-1	560	602	581	0.0962	0.69	523	645	584	0.29	0.0794	626	550	588	-0.16	0.39	AMD1_1231	586.333	21.3333	1759	64
AMD1_1232	Leucine--tRNA ligase	1188888	1191506	2619	3	4905	5020	4962	0.0322	0.84	4580	5599	5090	0.28	0.0481	5431	4584	5008	-0.22	0.0977	AMD1_1232	4896.67	94.3333	14690	283
AMD1_1233	conserved exported protein of unknown function	1191493	1192053	561	1	1853	2034	1943	0.13	0.49	1731	2034	1882	0.22	0.2	1973	1858	1915	-0.0755	0.66	AMD1_1233	1982.33	27	5947	81
AMD1_1234	Arginine transporter ATP-binding subunit	1192078	1193208	1131	1	643	723	683	0.16	0.33	601	800	700	0.4	0.00733	776	660	718	-0.21	0.19	AMD1_1234	703.333	30	2110	90
AMD1_1235	O-acetylserine/cysteine export protein	1193214	1194101	888	-3	36	53	45	0.43	0.21	34	68	51	0.91	0.00166	66	48	57	-0.31	0.21	AMD1_1235	52	127.333	156	382
AMD1_1236	AsnC family transcriptional regulator	1194234	1194671	438	3	294	334	314	0.17	0.33	274	348	311	0.32	0.0557	337	305	321	-0.12	0.5	AMD1_1236	325.333	64.3333	976	193
AMD1_1237	putative transaldolase	1194740	1195393	654	-1	915	1578	1246	0.75	5.12e-05	855	1587	1221	0.86	2.12e-06	1539	1441	1490	-0.0769	0.72	AMD1_1237	1545.67	109.333	4637	328
AMD1_1238	Primosomal protein N'	1195484	1197667	2184	2	982	1021	1002	0.0544	0.79	917	1032	975	0.16	0.43	1001	933	967	-0.0856	0.65	AMD1_1238	994.667	54.3333	2984	163
AMD1_1239	Precorrin-6Y C5,15-methyltransferase (Decarboxylating), CbiT subunit	1197673	1198191	519	-2	127	116	121	-0.11	0.7	118	99	108	-0.24	0.35	96	106	101	0.1	0.67	AMD1_1239	113.333	145	340	435
AMD1_1240	Ribonuclease VapC	1198237	1198689	453	-2	340	372	356	0.12	0.56	318	290	304	-0.12	0.59	281	340	311	0.22	0.22	AMD1_1240	363	138	1089	414
AMD1_1241	Antitoxin	1198686	1198928	243	-3	254	246	250	-0.0421	0.86	237	201	219	-0.23	0.25	195	225	210	0.17	0.37	AMD1_1241	240	15	720	45
AMD1_1242	conserved membrane protein of unknown function	1199126	1199521	396	2	569	629	599	0.14	0.37	531	577	554	0.11	0.53	560	575	567	0.0338	0.86	AMD1_1242	613.333	15	1840	45
AMD1_1243	protein of unknown function	1199463	1200350	888	-3	64	70	67	0.12	0.72	59	63	61	0.078	0.85	61	64	63	0.0286	0.92	AMD1_1243	68.3333	8754.67	205	26264
AMD1_1244	ATP synthase subunit delta	1199760	1200320	561	3	4900	6261	5580	0.34	0.00563	4576	7035	5805	0.6	5.08e-05	6822	5717	6270	-0.22	0.17	AMD1_1244	6114.33	52.3333	18343	157
AMD1_1245	ATP synthase F1 complex subunit alpha	1200320	1201849	1530	2	14100	18200	16200	0.35	0.00853	13200	21800	17500	0.7	2.67e-06	21100	16700	18900	-0.3	0.0396	AMD1_1245	17822.3	169.667	53467	509
AMD1_1246	ATP synthase gamma chain	1201866	1202750	885	3	9831	12700	11300	0.36	0.00291	9182	14600	11900	0.65	1.3e-06	14200	11600	12900	-0.26	0.0457	AMD1_1246	12405	96	37215	288
AMD1_1247	ATP synthase F1 complex subunit beta	1202816	1204363	1548	2	11800	16800	14300	0.48	0.00256	11000	19800	15400	0.82	6.67e-08	19200	15400	17300	-0.28	0.0915	AMD1_1247	16463.3	157.333	49390	472
AMD1_1248	ATP synthase epsilon chain	1204470	1204868	399	3	4774	6157	5465	0.36	0.0022	4458	7101	5780	0.64	1.3e-05	6884	5623	6253	-0.26	0.0965	AMD1_1248	6010.67	60.3333	18032	181
AMD1_1249	dTDP-glucose pyrophosphorylase	1205279	1206160	882	2	3486	3421	3454	-0.027	0.88	3255	3587	3421	0.14	0.39	3479	3124	3302	-0.14	0.29	AMD1_1249	3333	49	9999	147
AMD1_1250	dTDP-4-dehydrorhamnose 3,5-epimerase	1206153	1206716	564	3	701	732	716	0.0605	0.73	654	816	735	0.31	0.0307	791	669	730	-0.22	0.12	AMD1_1250	714.333	13.6667	2143	41
AMD1_1251	dTDP-glucose 4,6-dehydratase 2	1206713	1207792	1080	2	1352	1297	1324	-0.0574	0.76	1262	1475	1369	0.22	0.14	1431	1184	1308	-0.25	0.0769	AMD1_1251	1266.33	92.6667	3799	278
AMD1_1252	dTDP-4-dehydrorhamnose reductase	1207801	1208667	867	1	1529	1363	1446	-0.16	0.32	1428	1785	1607	0.31	0.0356	1732	1245	1488	-0.44	0.00266	AMD1_1252	1325.67	67	3977	201
AMD1_1253	protein of unknown function	1208803	1209711	909	1	3616	3063	3339	-0.23	0.0655	3376	3800	3588	0.17	0.25	3685	2798	3242	-0.37	0.00432	AMD1_1253	2982.67	184.667	8948	554
AMD1_1254	conserved protein of unknown function	1209708	1210952	1245	3	3777	3163	3470	-0.25	0.0257	3526	3398	3462	-0.0504	0.83	3295	2889	3092	-0.16	0.36	AMD1_1254	3083.67	244.333	9251	733
AMD1_1255	Demethyldecarbamoylnovobiocin O-methyltransferase	1210955	1211710	756	2	2466	2041	2253	-0.26	0.0282	2303	2392	2347	0.0528	0.79	2320	1864	2092	-0.29	0.0459	AMD1_1255	1987.67	59.3333	5963	178
AMD1_1256	N-acetylglucosaminyl-diphospho-decaprenol L-rhamnosyltransferase	1211748	1212590	843	3	1547	1523	1535	-0.0213	0.9	1445	1726	1585	0.25	0.13	1674	1391	1533	-0.24	0.11	AMD1_1256	1484.67	32.3333	4454	97
AMD1_1257	conserved protein of unknown function	1212587	1213867	1281	2	2185	1884	2034	-0.21	0.0834	2040	2139	2090	0.0644	0.74	2074	1721	1898	-0.24	0.11	AMD1_1257	1834.67	64.6667	5504	194
AMD1_1258	sn-glycerol 3-phosphate ABC transporter ATP binding subunit	1213910	1215001	1092	-1	84	47	65	-0.75	0.00563	78	80	79	0.0162	0.97	77	43	60	-0.68	0.0146	AMD1_1258	46	124.667	138	374
AMD1_1259	Atrazine chlorohydrolase	1215077	1216549	1473	-1	36	32	34	-0.12	0.77	33	44	39	0.33	0.31	43	29	36	-0.35	0.18	AMD1_1259	31.3333	42	94	126
AMD1_1260	Hydroxypyruvate isomerase	1216546	1217478	933	-2	18	14	16	-0.23	0.61	16	18	17	0.0643	0.89	17	12	15	-0.16	0.51	AMD1_1260	13.3333	12.6667	40	38
AMD1_1261	Xylose isomerase-like TIM barrel	1217475	1218551	1077	-3	16	14	15	-0.11	0.82	15	13	14	-0.0975	0.84	13	12	12	-0.00546	0.99	AMD1_1261	13.3333	8.66667	40	26
AMD1_1262	Lactose transport system permease protein LacG	1218609	1219502	894	-3											7.79	6.23	7.01	-0.0519	0.8	AMD1_1262	6.66667	22.3333	20	67
AMD1_1263	L-arabinose transport system permease protein AraP	1219506	1220423	918	-3																AMD1_1263	5.66667	25.6667	17	77
AMD1_1264	Maltose-binding periplasmic protein/domains	1220503	1221939	1437	-2	26	22	24	-0.17	0.68	24	17	21	-0.39	0.33	16	20	18	0.12	0.64	AMD1_1264	21.3333	50.3333	64	151
AMD1_1265	protein of unknown function	1222072	1222248	177	-2	21	14	17	-0.42	0.3	20	11	15	-0.58	0.18	11	12	12	0.0634	0.8	AMD1_1265	13.3333	2.66667	40	8
AMD1_1266	dipeptide ABC transporter ATP binding subunit DppF	1222586	1223548	963	-1	72	62	67	-0.17	0.6	67	30	48	-1.07	0.00024	29	57	43	0.82	0.0046	AMD1_1266	61	11	183	33
AMD1_1267	N-isopropylammelide isopropyl amidohydrolase	1223545	1224744	1200	-2	49	54	51	0.11	0.77	46	36	41	-0.3	0.36	34	49	42	0.34	0.18	AMD1_1267	52.3333	10.3333	157	31
AMD1_1268	dipeptide ABC transporter membrane subunit DppC	1224763	1225686	924	-2	15	16	16	0.0197	0.97	14	14	14	-0.0559	0.91	13	14	14	0.0459	0.86	AMD1_1268	15.3333	17	46	51
AMD1_1269	Glutathione transport system permease protein GsiC	1225683	1226648	966	-3	-	-			-	8.69	7.07	7.88	-0.15	0.75	6.85	11	8.98	0.18	0.41	AMD1_1269	12	32.6667	36	98
AMD1_1270	Putative gluthatione transporter,solute-binding component	1226706	1228271	1566	-3	100	88	94	-0.17	0.56	93	76	85	-0.26	0.33	74	80	77	0.0763	0.76	AMD1_1270	85.3333	53.6667	256	161
AMD1_1271	protein of unknown function	1228207	1228500	294	-2	17	18	17	0.0672	0.89	15	10	13	-0.36	0.4	10	16	13	0.26	0.31	AMD1_1271	17.3333	13.3333	52	40
AMD1_1272	dipeptide ABC transporter ATP binding subunit DppD	1228725	1229741	1017	-3	50	36	43	-0.4	0.21	47	28	38	-0.63	0.0515	28	33	30	0.14	0.6	AMD1_1272	35	12	105	36
AMD1_1273	Putative HTH-type transcriptional regulator YdfH	1229856	1230593	738	3	787	755	771	-0.0571	0.76	735	638	686	-0.19	0.27	619	689	654	0.13	0.44	AMD1_1273	736.333	59.6667	2209	179
AMD1_1274	Hydantoin racemase	1230590	1231357	768	-1	88	69	78	-0.29	0.34	82	55	69	-0.5	0.0707	54	63	58	0.14	0.59	AMD1_1274	67.3333	256.667	202	770
AMD1_1275	protein of unknown function	1231490	1231669	180	2																AMD1_1275	4.66667	3.33333	14	10
AMD1_1276	protein of unknown function	1231666	1231881	216	1																AMD1_1276	6	19	18	57
AMD1_1277	protein of unknown function	1231874	1232059	186	-1	19	18	19	-0.0306	0.96	18	16	17	-0.0927	0.85	16	17	16	0.0372	0.89	AMD1_1277	18	2.33333	54	7
AMD1_1278	conserved protein of unknown function	1232477	1232869	393	-1	48	39	44	-0.24	0.47	45	46	45	0.0165	0.97	44	36	40	-0.19	0.46	AMD1_1278	38.3333	34.6667	115	104
AMD1_1279	chaperonin GroEL	1232939	1234558	1620	-1	39	35	37	-0.11	0.79	36	35	35	-0.056	0.9	33	32	33	-0.0275	0.93	AMD1_1279	34.3333	76	103	228
AMD1_1280	cochaperonin GroES	1234597	1234911	315	-2	-	-			-	7.4	8.12	7.76	0.0512	0.92	7.88	6.47	7.17	-0.0521	0.81	AMD1_1280	7	12	21	36
AMD1_1281	conserved protein of unknown function	1235466	1235780	315	3	49	38	44	-0.28	0.44	46	33	40	-0.38	0.24	32	35	34	0.0471	0.87	AMD1_1281	37	13	111	39
AMD1_1282	protein of unknown function	1235603	1235848	246	-1	11	15	13	0.26	0.56	10	10	10	0.00935	0.98	10	14	12	0.13	0.58	AMD1_1282	14.6667	34.6667	44	104
AMD1_1283	conserved protein of unknown function	1235777	1236052	276	2	107	134	121	0.29	0.21	100	126	113	0.29	0.23	122	122	122	0.00289	0.99	AMD1_1283	130.667	45.6667	392	137
AMD1_1284	Glycoamylase domain-containing protein	1236180	1237454	1275	3	420	458	439	0.12	0.5	392	414	403	0.0743	0.73	402	418	410	0.0486	0.81	AMD1_1284	446.333	75	1339	225
AMD1_1285	ATP-dependent DNA helicase RecQ	1237568	1239367	1800	2	750	790	770	0.071	0.74	700	696	698	-0.00782	0.97	675	721	698	0.0827	0.64	AMD1_1285	769.333	158.333	2308	475
AMD1_1286	AraC family transcriptional regulator	1239406	1240467	1062	-2	254	278	266	0.12	0.59	237	271	254	0.18	0.41	263	254	258	-0.036	0.88	AMD1_1286	271	308.667	813	926
AMD1_1287	DAO domain-containing protein	1240548	1241771	1224	-3	55	52	53	-0.0602	0.88	51	51	51	-0.0169	0.97	49	48	49	-0.0226	0.94	AMD1_1287	51	324	153	972
AMD1_1288	Glutamine amidotransferase	1241773	1242960	1188	-2	134	110	122	-0.26	0.28	126	119	122	-0.0765	0.79	115	101	108	-0.14	0.56	AMD1_1288	107.333	16	322	48
AMD1_1289	putative peptide ABC transporter periplasmic-binding protein y4tO	1243269	1244864	1596	3	253	297	275	0.22	0.25	236	282	259	0.23	0.26	273	271	272	-0.00385	0.99	AMD1_1289	289.667	171	869	513
AMD1_1290	Microcystinase C	1244992	1246470	1479	1	72	74	73	0.0265	0.95	67	78	72	0.18	0.57	75	67	71	-0.0973	0.71	AMD1_1290	72	109	216	327
AMD1_1291	glutathione ABC transporter membrane subunit GsiC	1246495	1247436	942	1	58	68	63	0.2	0.55	54	78	66	0.45	0.0928	75	62	69	-0.18	0.45	AMD1_1291	67	83.3333	201	250
AMD1_1292	putative peptide ABC transporter permease protein y4tQ	1247453	1248316	864	2	54	51	53	-0.0761	0.84	51	63	57	0.25	0.42	61	47	54	-0.25	0.29	AMD1_1292	50	330.667	150	992
AMD1_1293	glutathione ABC transporter ATP binding subunit GsiA	1248364	1250190	1827	1	201	201		0.000105	1	188	205	196	0.12	0.59	199	183	191	-0.0957	0.65	AMD1_1293	195.333	306.667	586	920
AMD1_1294	protein of unknown function	1250426	1250587	162	2	58	54	56	-0.0978	0.79	55	52	53	-0.0677	0.85	50	49	50	-0.016	0.96	AMD1_1294	52.3333	85	157	255
AMD1_1295	50S ribosomal protein L21	1251260	1251691	432	2	11200	10700	10900	-0.0666	0.68	10500	11000	10700	0.067	0.77	10600	9748	10200	-0.1	0.58	AMD1_1295	10399.3	78	31198	234
AMD1_1296	50S ribosomal subunit protein L27	1251717	1251986	270	3	8430	8413	8422	0.00251	0.99	7873	8964	8419	0.17	0.39	8695	7684	8189	-0.15	0.41	AMD1_1296	8199	57.3333	24597	172
AMD1_1297	50S ribosomal protein acetyltransferase	1252108	1252695	588	1	877	1305	1091	0.55	5.46e-05	819	1717	1268	1.04	1.25e-11	1664	1192	1428	-0.44	0.00252	AMD1_1297	1272.33	67.6667	3817	203
AMD1_1298	Exodeoxyribonuclease III (Xth)	1252704	1253564	861	-3	279	298	288	0.0847	0.76	260	257	259	-0.0153	0.96	249	272	261	0.0994	0.62	AMD1_1298	289.333	1583.33	868	4750
AMD1_1299	GTPase ObgE	1253679	1254716	1038	3	1637	1793	1715	0.13	0.36	1529	1954	1741	0.34	0.0308	1895	1637	1766	-0.18	0.25	AMD1_1299	1746.67	19.3333	5240	58
AMD1_1300	glutamate 5-kinase	1254727	1255875	1149	1	1921	1758	1839	-0.12	0.48	1794	2202	1998	0.28	0.0515	2136	1605	1871	-0.38	0.00832	AMD1_1300	1710.67	10.3333	5132	31
AMD1_1301	glutamate-5-semialdehyde dehydrogenase	1255879	1257159	1281	1	3287	3374	3330	0.0357	0.86	3069	3520	3295	0.19	0.32	3415	3082	3248	-0.12	0.51	AMD1_1301	3283	27	9849	81
AMD1_1302	putative nicotinate-nucleotide adenylyltransferase	1257252	1257899	648	3	300	338	319	0.16	0.37	280	365	323	0.36	0.0254	354	309	331	-0.17	0.31	AMD1_1302	329.333	64	988	192
AMD1_1303	Beta-lactamase	1257902	1258897	996	-1	456	373	415	-0.28	0.12	426	338	382	-0.32	0.0735	328	341	334	0.044	0.83	AMD1_1303	364.333	117	1093	351
AMD1_1304	protein of unknown function	1258786	1258959	174	-2	79	53	66	-0.48	0.11	73	45	59	-0.65	0.0186	43	48	46	0.0931	0.73	AMD1_1304	52	5.66667	156	17
AMD1_1305	Right origin-binding protein	1259033	1259863	831	-1	78	64	71	-0.25	0.38	73	78	75	0.0782	0.81	75	58	67	-0.26	0.27	AMD1_1305	62	22.6667	186	68
AMD1_1306	Putative MFS-type transporter YcaD	1260074	1261324	1251	2	158	161	159	0.0236	0.94	147	225	186	0.56	0.0085	218	147	183	-0.49	0.0125	AMD1_1306	156.667	52	470	156
AMD1_1307	Ribosomal silencing factor RsfS	1261632	1261871	240	3	6712	7332	7022	0.12	0.46	6269	5315	5792	-0.23	0.13	5156	6698	5927	0.35	0.0114	AMD1_1307	7138	46	21414	138
AMD1_1308	Ribosomal RNA large subunit methyltransferase H	1261889	1262371	483	2	3481	3821	3651	0.13	0.52	3251	2921	3086	-0.15	0.41	2833	3491	3162	0.27	0.0563	AMD1_1308	3717.67	62	11153	186
AMD1_1309	Septal ring factor	1262494	1263813	1320	1	5885	5099	5492	-0.2	0.23	5495	5753	5624	0.0632	0.73	5579	4657	5118	-0.23	0.11	AMD1_1309	4964.33	120.667	14893	362
AMD1_1310	Carboxy-terminal-processing protease	1263815	1265143	1329	2	10400	8927	9656	-0.21	0.0943	9698	9644	9671	-0.00699	0.97	9349	8153	8751	-0.17	0.29	AMD1_1310	8695.33	68.3333	26086	205
AMD1_1311	putative divergent polysaccharide deacetylase	1265247	1266398	1152	3	1265	1000	1132	-0.32	0.0568	1181	1221	1201	0.0445	0.85	1184	914	1049	-0.32	0.0591	AMD1_1311	971.667	35	2915	105
AMD1_1312	RNA pyrophosphohydrolase	1266402	1266923	522	3	642	531	586	-0.26	0.14	599	604	601	0.0103	0.97	585	485	535	-0.23	0.17	AMD1_1312	516.333	16	1549	48
AMD1_1313	Regulator of nucleoside diphosphate kinase	1267210	1267638	429	1	156	109	133	-0.45	0.0742	146	191	169	0.35	0.16	185	100	143	-0.82	2.88e-05	AMD1_1313	106.333	12	319	36
AMD1_1314	Regulator of nucleoside diphosphate kinase	1267707	1268249	543	3	467	294	380	-0.6	0.0151	436	417	427	-0.0588	0.82	405	269	337	-0.49	0.0266	AMD1_1314	285	35.3333	855	106
AMD1_1315	D-amino acid dehydrogenase	1268370	1269626	1257	3	853	745	799	-0.19	0.18	797	724	760	-0.13	0.5	702	680	691	-0.0371	0.86	AMD1_1315	725.333	114.333	2176	343
AMD1_1316	Glyoxalase	1269631	1270032	402	-2	158	195	176	0.28	0.15	147	159	153	0.0983	0.71	155	178	166	0.16	0.42	AMD1_1316	190.333	39.6667	571	119
AMD1_1317	conserved protein of unknown function	1270038	1270667	630	-3	81	90	85	0.12	0.72	76	84	80	0.13	0.69	82	82	82	0.0033	0.99	AMD1_1317	87	65.6667	261	197
AMD1_1318	Transcriptional regulator, LysR family	1270818	1271699	882	-3	73	90	81	0.26	0.36	68	88	78	0.32	0.22	85	82	84	-0.0382	0.89	AMD1_1318	87.6667	52.3333	263	157
AMD1_1319	Putative 3-oxopropanoate dehydrogenase	1271880	1273376	1497	3	610	715	662	0.21	0.31	569	465	517	-0.27	0.22	451	653	552	0.47	0.0102	AMD1_1319	698.333	84.3333	2095	253
AMD1_1320	exported protein of unknown function	1273599	1273847	249	3	87	41	64	-0.97	0.00103	81	48	65	-0.69	0.0151	46	38	42	-0.16	0.53	AMD1_1320	40.6667	6.66667	122	20
AMD1_1321	protein of unknown function	1273784	1273939	156	2	45	30	37	-0.46	0.16	42	37	39	-0.14	0.71	36	27	32	-0.21	0.4	AMD1_1321	29.3333	9	88	27
AMD1_1322	Putative HTH-type transcriptional regulator YdfH	1273952	1274689	738	-1	67	72	69	0.0749	0.83	63	56	59	-0.14	0.68	54	65	60	0.17	0.49	AMD1_1322	70	16.3333	210	49
AMD1_1323	4-hydroxy-tetrahydrodipicolinate synthase	1274715	1275608	894	3	318	327	323	0.0359	0.9	297	266	282	-0.15	0.5	258	299	279	0.17	0.38	AMD1_1323	320.333	7.66667	961	23
AMD1_1324	D-amino acid dehydrogenase small subunit	1275642	1276895	1254	3	300	294	297	-0.026	0.91	280	236	258	-0.23	0.2	229	269	249	0.2	0.27	AMD1_1324	287	68.6667	861	206
AMD1_1325	4-hydroxyproline 2-epimerase	1276914	1277915	1002	3	422	404	413	-0.0612	0.78	395	264	329	-0.56	0.000862	256	369	312	0.47	0.00498	AMD1_1325	394.667	73	1184	219
AMD1_1326	protein of unknown function	1278044	1278241	198	-1	15	13	14	-0.13	0.78	14	4.31	9.06	-1.24	0.0263	4.18	12	7.89	0.57	0.0789	AMD1_1326	12.3333	2011.33	37	6034
AMD1_1327	branched chain amino acid/phenylalanine ABC transporter membrane subunit LivH	1278262	1279164	903	1	2546	1917	2231	-0.38	0.063	2378	799	1589	-1.54	1.17e-17	775	1751	1263	1.15	3.16e-17	AMD1_1327	1873.67	41	5621	123
AMD1_1328	Branched-chain amino acid transport system permease protein livM (TC 3.A.1.4.1)	1279169	1280764	1596	2	4143	3570	3856	-0.2	0.29	3870	1550	2710	-1.29	4.61e-16	1504	3260	2382	1.09	2.54e-15	AMD1_1328	3485.67	110.667	10457	332
AMD1_1329	Sulfate/thiosulfate import ATP-binding protein CysA	1280764	1282782	2019	1	6298	4571	5435	-0.44	0.00278	5883	2192	4038	-1.4	2.54e-20	2127	4175	3151	0.94	2.32e-12	AMD1_1329	4448	74	13344	222
AMD1_1330	branched chain amino acid/phenylalanine ABC transporter ATP binding subunit LivF	1282779	1283510	732	3	2032	1517	1774	-0.4	0.00705	1898	737	1318	-1.34	9.85e-19	715	1385	1050	0.93	2.85e-13	AMD1_1330	1477.33	87.6667	4432	263
AMD1_1331	conserved membrane protein of unknown function	1283522	1283869	348	2	2049	2249	2149	0.13	0.49	1914	844	1379	-1.16	1.95e-14	819	2054	1436	1.3	1.58e-20	AMD1_1331	2194.33	53.6667	6583	161
AMD1_1332	L-leucine/L-phenylalanine ABC transporter periplasmic binding protein	1284013	1285131	1119	1	10400	10100	10300	-0.0289	0.93	9699	3254	6477	-1.53	8.59e-12	3155	9267	6211	1.52	2.4e-23	AMD1_1332	9907	154.667	29721	464
AMD1_1333	Pyruvate carboxylase	1285322	1288780	3459	2	14100	14700	14400	0.056	0.79	13100	12900	13000	-0.023	0.9	12500	13400	13000	0.0841	0.62	AMD1_1333	14343.3	219.667	43030	659
AMD1_1334	conserved protein of unknown function	1288830	1289669	840	-3	316	86	201	-1.84	3.09e-21	295	112	203	-1.34	5.32e-08	109	79	94	-0.33	0.16	AMD1_1334	84	507	252	1521
AMD1_1335	Inner membrane protein YbjJ	1290035	1291222	1188	2	226	191	209	-0.22	0.3	211	262	236	0.29	0.14	254	175	214	-0.48	0.00502	AMD1_1335	186.667	35.3333	560	106
AMD1_1336	protein of unknown function	1291289	1291525	237	-1	83	16	50	-2.22	1.73e-07	77	17	47	-2.08	3.45e-07	16	15	16	-0.0421	0.88	AMD1_1336	16	5	48	15
AMD1_1337	conserved protein of unknown function	1291351	1291509	159	-2	58	12	35	-2.08	3.96e-06	54	12	33	-2.05	9.36e-06						AMD1_1337	12	4	36	12
AMD1_1338	Multidrug transporter MdtC	1291606	1294779	3174	-2	3038	3281	3159	0.11	0.48	2836	2742	2789	-0.0463	0.81	2660	2997	2828	0.15	0.33	AMD1_1338	3201.33	84.3333	9604	253
AMD1_1339	Membrane-fusion protein	1294783	1295913	1131	-2	1599	1420	1509	-0.16	0.36	1493	1258	1375	-0.23	0.26	1220	1297	1258	0.072	0.72	AMD1_1339	1383.33	82.3333	4150	247
AMD1_1340	Patatin-like phospholipase	1296159	1297289	1131	-3	198	149	173	-0.36	0.18	184	266	225	0.48	0.0511	258	136	197	-0.86	1.63e-05	AMD1_1340	145.667	34.3333	437	103
AMD1_1341	D-beta-hydroxybutyrate dehydrogenase	1297313	1298095	783	-1	244	147	196	-0.63	0.0421	228	307	267	0.36	0.23	297	134	216	-1.04	9.07e-05	AMD1_1341	144.333	20.6667	433	62
AMD1_1342	conserved exported protein of unknown function	1298217	1298804	588	-3	129	153	141	0.22	0.37	120	72	96	-0.67	0.0141	70	139	105	0.89	0.000635	AMD1_1342	149.333	18.3333	448	55
AMD1_1343	Cypemycin methyltransferase	1298913	1299662	750	3	324	292	308	-0.14	0.49	302	291	297	-0.0507	0.83	282	267	275	-0.0659	0.76	AMD1_1343	284.333	21.3333	853	64
AMD1_1344	4-hydroxy-3-methylbut-2-en-1-yl diphosphate synthase (flavodoxin)	1299765	1301015	1251	3	1855	1774	1815	-0.0621	0.69	1732	2328	2030	0.41	0.00198	2258	1621	1939	-0.45	0.000502	AMD1_1344	1729	81	5187	243
AMD1_1345	Soluble lytic murein transglycosylase	1301018	1301872	855	2	301	303	302	0.00802	0.98	281	363	322	0.34	0.0759	352	277	314	-0.29	0.12	AMD1_1345	294.667	49.3333	884	148
AMD1_1346	Nitrogen regulatory protein	1301880	1302347	468	-3	33	24	29	-0.35	0.35	31	19	25	-0.6	0.1	18	22	20	0.13	0.62	AMD1_1346	23.6667	65	71	195
AMD1_1347	conserved protein of unknown function	1302359	1302532	174	-1	-	-			-	8.93	9	8.96	-0.015	0.98	8.72	7.21	7.97	-0.0557	0.81	AMD1_1347	7.66667	38	23	114
AMD1_1348	Histidine kinase	1302691	1305021	2331	-2	2105	1967	2036	-0.0939	0.6	1966	1600	1783	-0.29	0.0396	1551	1797	1674	0.19	0.22	AMD1_1348	1912.67	117.667	5738	353
AMD1_1349	Farnesyl diphosphate synthase	1305139	1306056	918	-2	327	334	330	0.0281	0.9	305	459	382	0.57	0.000146	445	305	375	-0.51	0.000574	AMD1_1349	325.333	30.6667	976	92
AMD1_1350	Biosynthetic peptidoglycan transglycosylase	1306185	1306895	711	3	805	589	697	-0.41	0.0507	752	863	807	0.18	0.4	837	539	688	-0.56	0.0044	AMD1_1350	571.333	50	1714	150
AMD1_1351	50S ribosomal subunit protein L32	1307051	1307233	183	2	6958	10100	8506	0.51	0.000669	6499	10300	8392	0.64	7.44e-05	9977	9184	9581	-0.1	0.56	AMD1_1351	9777	115	29331	345
AMD1_1352	conserved membrane protein of unknown function	1307402	1307815	414	2	441	427	434	-0.0446	0.84	412	608	510	0.54	0.00065	589	390	490	-0.55	0.000327	AMD1_1352	417	377	1251	1131
AMD1_1353	putative Protein GlcG	1307848	1308276	429	-2	184	2281	1233	3.62	3.06e-126	172	3023	1598	4.12	1.91e-114	2932	2083	2507	-0.44	0.00691	AMD1_1353	2229.67	121	6689	363
AMD1_1354	PhbF	1308600	1309202	603	-3	2644	2335	2490	-0.17	0.29	2469	2297	2383	-0.1	0.54	2228	2133	2180	-0.0549	0.76	AMD1_1354	2271.67	24.6667	6815	74
AMD1_1355	acetyl-CoA acetyltransferase	1309499	1310683	1185	2	3273	3928	3601	0.25	0.12	3056	3169	3113	0.0477	0.82	3072	3588	3330	0.19	0.23	AMD1_1355	3835	54.3333	11505	163
AMD1_1356	3-oxoacyl-[acyl-carrier-protein] reductase FabG	1310781	1311503	723	3	1152	971	1062	-0.23	0.31	1076	661	869	-0.67	0.000429	641	887	764	0.42	0.00952	AMD1_1356	947.667	58.3333	2843	175
AMD1_1357	water channel AqpZ	1311574	1312263	690	-2	232	251	241	0.1	0.71	216	70	143	-1.59	1.1e-13	68	229	149	1.71	8.41e-15	AMD1_1357	246	33	738	99
AMD1_1358	ATP-DEPENDENT DNA HELICASE	1313006	1316275	3270	2	5045	5994	5519	0.24	0.0367	4711	6168	5440	0.38	0.0028	5982	5475	5729	-0.12	0.39	AMD1_1358	5839.67	126.667	17519	380
AMD1_1359	Ribosome-associated heat shock protein implicated in the recycling of the 50S subunit (S4 paralog)	1316281	1316664	384	1	673	870	772	0.35	0.0546	629	879	754	0.46	0.01	853	795	824	-0.0887	0.61	AMD1_1359	848.333	29.3333	2545	88
AMD1_1360	Ferredoxin-2	1316812	1317150	339	1	4437	5849	5143	0.37	0.0336	4142	8737	6440	1.04	8.78e-08	8477	5343	6910	-0.58	0.00424	AMD1_1360	5680.33	50	17041	150
AMD1_1361	CarD-like transcriptional regulator	1317507	1318091	585	3	7151	8422	7786	0.23	0.18	6678	7742	7210	0.21	0.17	7506	7694	7600	0.0297	0.88	AMD1_1361	8183	127	24549	381
AMD1_1362	cystine ABC transporter ATP binding subunit	1318166	1318939	774	-1	336	343	339	0.0221	0.95	314	945	630	1.56	1.03e-17	917	313	615	-1.5	1.96e-11	AMD1_1362	332	50.3333	996	151
AMD1_1363	cystine ABC transporter membrane subunit	1318936	1319616	681	-2	175	213	194	0.25	0.33	164	616	390	1.88	3.01e-20	597	194	396	-1.57	1.11e-12	AMD1_1363	206.333	61.3333	619	184
AMD1_1364	cystine ABC transporter periplasmic binding protein	1319751	1320524	774	-3	3533	7227	5380	0.98	7.55e-07	3298	15600	9452	2.19	7.13e-17	15100	6601	10900	-0.88	0.0254	AMD1_1364	7012.33	115.667	21037	347
AMD1_1365	RNA polymerase sigma factor RpoH	1320776	1321645	870	2	245	105	175	-1.18	3.49e-08	229	145	187	-0.62	0.00431	140	95	118	-0.46	0.029	AMD1_1365	102.333	93.3333	307	280
AMD1_1366	Putative Zn-dependent protease	1321650	1323089	1440	-3	1943	1751	1847	-0.14	0.41	1815	3027	2421	0.72	5.88e-08	2936	1600	2268	-0.84	3.5e-09	AMD1_1366	1702.67	48.3333	5108	145
AMD1_1367	thiamine ABC transporter ATP binding subunit	1323312	1324037	726	-3	935	1060	997	0.17	0.2	873	978	925	0.16	0.37	949	968	958	0.0239	0.91	AMD1_1367	1032.67	78	3098	234
AMD1_1368	thiamine ABC transporter membrane subunit	1324034	1325650	1617	-1	1564	1669	1616	0.0906	0.57	1461	1773	1617	0.27	0.1	1719	1524	1622	-0.15	0.34	AMD1_1368	1627.67	64.6667	4883	194
AMD1_1369	thiamine ABC transporter periplasmic binding protein	1325899	1326903	1005	-2	2228	2541	2384	0.18	0.19	2081	2999	2540	0.51	0.000184	2907	2320	2614	-0.3	0.0263	AMD1_1369	2481	69.6667	7443	209
AMD1_1370	Thiamin pyrophosphokinase	1327173	1327817	645	3	257	265	261	0.0428	0.87	240	330	285	0.44	0.0121	320	242	281	-0.35	0.0439	AMD1_1370	258.333	11.6667	775	35
AMD1_1371	ATP-binding protein Uup	1327821	1329635	1815	3	1191	1073	1132	-0.14	0.42	1112	1414	1263	0.33	0.0198	1371	980	1175	-0.45	0.000988	AMD1_1371	1043.67	57	3131	171
AMD1_1372	Post-segregation antitoxin (Ccd killing mechanism protein) encoded by the F plasmid	1329698	1329940	243	2	687	715	701	0.0529	0.8	642	651	647	0.0177	0.93	632	653	642	0.0418	0.84	AMD1_1372	695.667	36.6667	2087	110
AMD1_1373	Cytotoxic protein CcdB	1329940	1330239	300	1	249	364	306	0.53	0.00049	232	259	246	0.15	0.47	251	333	292	0.36	0.0251	AMD1_1373	355.667	414.667	1067	1244
AMD1_1374	conserved protein of unknown function	1330289	1331809	1521	-1	3501	3350	3425	-0.0622	0.66	3269	4198	3734	0.35	0.00549	4071	3060	3565	-0.39	0.00154	AMD1_1374	3263.67	69.6667	9791	209
AMD1_1375	adenylosuccinate synthetase	1331883	1333181	1299	-3	6082	5260	5671	-0.2	0.13	5679	7456	6568	0.38	0.0023	7232	4804	6018	-0.56	1.16e-05	AMD1_1375	5122	104	15366	312
AMD1_1376	Carboxylate/amino acid/amine transporter	1333378	1334310	933	1	54	61	57	0.15	0.67	50	95	73	0.87	0.000375	93	55	74	-0.62	0.0106	AMD1_1376	59.3333	115	178	345
AMD1_1377	D-3-phosphoglycerate dehydrogenase	1334378	1335976	1599	-1	3742	2555	3148	-0.48	0.083	3491	6861	5176	0.91	0.000149	6656	2334	4495	-1.47	2.49e-14	AMD1_1377	2480.67	109.333	7442	328
AMD1_1378	Phosphoserine aminotransferase	1336152	1337327	1176	-3	7109	7509	7309	0.0692	0.8	6635	14000	10300	1.04	2.61e-08	13600	6859	10200	-0.95	4.73e-09	AMD1_1378	7297.67	57.3333	21893	172
AMD1_1379	Adhesin	1337511	1338206	696	-3	1212	1353	1283	0.15	0.47	1132	1025	1079	-0.13	0.51	994	1236	1115	0.28	0.044	AMD1_1379	1318.67	148.667	3956	446
AMD1_1380	Opacity protein antigen	1338415	1339191	777	-2	3682	4808	4245	0.35	0.12	3440	2765	3102	-0.29	0.2	2681	4391	3536	0.69	8.88e-09	AMD1_1380	4684.67	56.3333	14054	169
AMD1_1381	phosphoglucosamine mutase	1339405	1340757	1353	-2	1863	1685	1774	-0.14	0.42	1739	1594	1667	-0.12	0.5	1546	1539	1543	-0.00506	0.98	AMD1_1381	1641.67	35	4925	105
AMD1_1382	protein of unknown function	1340760	1340975	216	-3	186	147	166	-0.31	0.17	173	152	163	-0.18	0.48	148	134	141	-0.1	0.66	AMD1_1382	143	66	429	198
AMD1_1383	conserved protein of unknown function	1340958	1341344	387	3	230	217	223	-0.0765	0.76	214	201	207	-0.0944	0.71	194	198	196	0.0264	0.91	AMD1_1383	211.667	20.6667	635	62
AMD1_1384	ATP-dependent zinc metalloprotease FtsH	1341808	1343742	1935	-2	8278	8837	8558	0.0919	0.48	7730	9931	8830	0.35	0.00707	9629	8072	8850	-0.23	0.0709	AMD1_1384	8620.33	146.333	25861	439
AMD1_1385	tRNA(Ile)-lysidine synthase	1343847	1345202	1356	-3	314	227	270	-0.45	0.00836	293	327	310	0.14	0.49	317	207	262	-0.55	0.00142	AMD1_1385	220.667	20.6667	662	62
AMD1_1386	Cell division coordinator CpoB	1345196	1346251	1056	-1	6816	7397	7106	0.11	0.42	6365	9753	8059	0.59	4.48e-05	9456	6756	8106	-0.45	0.00108	AMD1_1386	7215	105	21645	315
AMD1_1387	Peptidoglycan-associated lipoprotein	1346412	1346921	510	-3	4408	4552	4480	0.0442	0.83	4117	5584	4850	0.41	0.0449	5412	4157	4784	-0.33	0.0676	AMD1_1387	4441.33	59.6667	13324	179
AMD1_1388	Tol-Pal system protein TolB	1347173	1348489	1317	-1	2896	2622	2759	-0.14	0.41	2704	3329	3017	0.28	0.15	3228	2395	2811	-0.38	0.0207	AMD1_1388	2559.67	141	7679	423
AMD1_1389	TolA protein	1348527	1349588	1062	-3	2663	1865	2264	-0.5	5.46e-05	2487	2933	2710	0.23	0.13	2844	1703	2274	-0.71	3.94e-07	AMD1_1389	1815.33	28.6667	5446	86
AMD1_1390	Ton complex subunit ExbD	1349597	1350055	459	-1	1424	1056	1240	-0.42	0.000683	1330	1704	1517	0.34	0.0299	1652	964	1308	-0.74	1.13e-07	AMD1_1390	1029.67	20	3089	60
AMD1_1391	Tol-Pal system protein TolQ	1350066	1350776	711	-3	3194	2256	2725	-0.49	6.05e-05	2982	3410	3196	0.18	0.28	3307	2060	2683	-0.64	1.31e-05	AMD1_1391	2198	30	6594	90
AMD1_1392	4-hydroxybenzoyl-CoA thioesterase family active site	1351121	1351588	468	-1	369	374	372	0.015	0.96	345	440	392	0.33	0.11	426	342	384	-0.27	0.13	AMD1_1392	363.667	20.3333	1091	61
AMD1_1393	Endoglucanase C	1351655	1352893	1239	2	476	445	461	-0.093	0.62	445	360	402	-0.29	0.0892	349	407	378	0.19	0.27	AMD1_1393	433.333	28.3333	1300	85
AMD1_1394	protein of unknown function	1352968	1353261	294	1	66	43	55	-0.51	0.1	61	49	55	-0.29	0.34	47	40	43	-0.15	0.57	AMD1_1394	42	9	126	27
AMD1_1395	protein of unknown function	1353497	1353646	150	-1																AMD1_1395	2.33333	11.3333	7	34
AMD1_1396	protein of unknown function	1353809	1354003	195	2	186	144	165	-0.32	0.27	174	173	173	-0.0107	0.98	168	132	150	-0.24	0.32	AMD1_1396	140	23.3333	420	70
AMD1_1397	conserved protein of unknown function	1354000	1354674	675	1	134	114	124	-0.21	0.5	125	131	128	0.0445	0.9	127	104	115	-0.18	0.45	AMD1_1397	110.333	77	331	231
AMD1_1398	Histone acetyltransferase HPA2 and related acetyltransferases	1354734	1355222	489	-3	376	329	352	-0.18	0.34	351	360	355	0.0345	0.89	349	301	325	-0.18	0.29	AMD1_1398	320.667	17.3333	962	52
AMD1_1399	Holliday junction branch migration complex subunit RuvB	1355219	1356259	1041	-1	532	488	510	-0.11	0.59	496	487	492	-0.0255	0.91	472	446	459	-0.0705	0.72	AMD1_1399	477	27	1431	81
AMD1_1400	Putative nucleic acid-binding protein, contains PIN domain	1356256	1356660	405	-2	298	292	295	-0.0291	0.92	279	275	277	-0.0181	0.94						AMD1_1400	286	16.3333	858	49
AMD1_1401	Putative regulator PrlF	1356657	1356932	276	-3	486	437	462	-0.15	0.43	454	377	416	-0.25	0.18	366	399	382	0.1	0.6	AMD1_1401	426.667	3.66667	1280	11
AMD1_1402	Holliday junction ATP-dependent DNA helicase RuvA	1357000	1357620	621	-2	203	208	206	0.0303	0.92	190	193	191	0.0175	0.95	187	190	188	0.0203	0.94	AMD1_1402	204	14	612	42
AMD1_1403	PINc domain-containing protein	1357634	1358047	414	-1	335	336	335	0.00264	0.99	313	332	322	0.0799	0.7	322	307	314	-0.0581	0.77	AMD1_1403	327.667	14	983	42
AMD1_1404	Transcriptional regulator, AbrB family	1358028	1358297	270	-3	458	399	429	-0.19	0.23	428	459	444	0.0923	0.66	445	364	405	-0.25	0.13	AMD1_1404	389	14.6667	1167	44
AMD1_1405	Transcriptional regulator, AbrB family	1358365	1358616	252	-2	169	144	157	-0.21	0.42	158	257	208	0.67	0.000173	249	132	191	-0.86	1.74e-05	AMD1_1405	140	9	420	27
AMD1_1406	crossover junction endodeoxyribonuclease RuvC	1358677	1359195	519	-2	442	491	466	0.14	0.5	413	567	490	0.44	0.00611	550	448	499	-0.25	0.14	AMD1_1406	476.667	15	1430	45
AMD1_1407	conserved protein of unknown function	1359283	1359819	537	-2	1875	1878	1876	0.00236	0.99	1751	1765	1758	0.0101	0.96	1711	1715	1713	0.00281	0.99	AMD1_1407	1829.67	21.6667	5489	65
AMD1_1408	conserved membrane protein of unknown function	1360225	1360602	378	-2	142	120	131	-0.22	0.43	133	131	132	-0.0172	0.96	127	109	118	-0.15	0.51	AMD1_1408	116.333	37	349	111
AMD1_1409	protein of unknown function	1360740	1360967	228	3	-	-			-	8.46	7.31	7.88	-0.12	0.81	7.08	7.12	7.1	0.00882	0.97	AMD1_1409	7.66667	26	23	78
AMD1_1410	protein of unknown function	1360980	1361186	207	-3	-	-			-	7.67	16	12	0.77	0.0906	16	9.42	13	-0.29	0.26	AMD1_1410	10	38.3333	30	115
AMD1_1411	Putative integral membrane protein	1361154	1361705	552	3	95	86	90	-0.13	0.66	89	84	86	-0.0719	0.83	81	78	80	-0.0377	0.89	AMD1_1411	83.3333	30.3333	250	91
AMD1_1412	4-hydroxybutyrate--CoA ligase 2	1361753	1363390	1638	-1	430	462	446	0.0996	0.58	401	377	389	-0.0878	0.66	365	422	394	0.18	0.27	AMD1_1412	451	91.6667	1353	275
AMD1_1413	putative membrane transporter protein	1363443	1364213	771	-3	145	152	148	0.06	0.84	135	206	170	0.57	0.00339	200	139	169	-0.45	0.0218	AMD1_1413	147.667	31.3333	443	94
AMD1_1414	Thiamin-phosphate pyrophosphorylase	1364390	1365037	648	2	1009	700	854	-0.51	9.86e-05	942	1234	1088	0.38	0.00597	1197	639	918	-0.88	3.4e-11	AMD1_1414	681	24.6667	2043	74
AMD1_1415	FOG: TPR repeat, SEL1 subfamily	1365040	1366149	1110	1	982	736	859	-0.4	0.00386	917	1120	1018	0.28	0.0737	1086	673	879	-0.66	1.24e-06	AMD1_1415	716.667	62.3333	2150	187
AMD1_1416	Elongation factor P 1	1366254	1366820	567	3	2736	2899	2817	0.0806	0.61	2555	3024	2789	0.23	0.17	2934	2648	2791	-0.13	0.45	AMD1_1416	2823.33	36.6667	8470	110
AMD1_1417	Inositol-1-monophosphatase	1366846	1367646	801	1	2133	2387	2260	0.15	0.37	1992	2652	2322	0.4	0.00794	2572	2181	2376	-0.21	0.14	AMD1_1417	2323.33	73.3333	6970	220
AMD1_1418	Hemolysin	1367719	1368408	690	1	341	621	481	0.84	1.63e-09	318	783	551	1.27	4.88e-18	760	567	664	-0.38	0.00717	AMD1_1418	604.667	64.6667	1814	194
AMD1_1419	MotA/TolQ/ExbB proton channel family protein, probably associated with flagella	1368646	1369623	978	1	1197	1227	1212	0.0336	0.86	1118	945	1031	-0.23	0.11	916	1120	1018	0.26	0.0533	AMD1_1419	1197.67	28.3333	3593	85
AMD1_1420	Flagellar motor rotation protein MotB	1369624	1370655	1032	1	1399	1296	1348	-0.11	0.47	1307	1152	1229	-0.17	0.25	1117	1184	1151	0.0735	0.65	AMD1_1420	1264	29.6667	3792	89
AMD1_1421	conserved exported protein of unknown function	1370935	1371339	405	1	640	41	340	-3.93	9.33e-101	597	156	376	-1.91	2.72e-19	151	38	94	-1.92	5.56e-11	AMD1_1421	40.3333	33.3333	121	100
AMD1_1422	Putative membrane protein	1371402	1371755	354	-3	43	52	47	0.22	0.51	40	31	36	-0.31	0.37	30	47	39	0.46	0.0928	AMD1_1422	50.6667	15.3333	152	46
AMD1_1423	Metal-dependent carboxypeptidase	1371893	1373377	1485	2	323	364	343	0.16	0.38	302	328	315	0.12	0.56	318	332	325	0.0497	0.8	AMD1_1423	355	38.6667	1065	116
AMD1_1424	protein of unknown function	1373531	1374613	1083	2	149	166	157	0.14	0.6	139	137	138	-0.023	0.94	133	152	142	0.14	0.52	AMD1_1424	161.333	24.6667	484	74
AMD1_1425	protein of unknown function	1374615	1375181	567	3	51	41	46	-0.23	0.49	47	36	42	-0.31	0.34	35	38	36	0.0557	0.84	AMD1_1425	40.3333	9	121	27
AMD1_1426	NAD(P)H nitroreductase	1375277	1375966	690	2	163	180	172	0.13	0.56	152	119	135	-0.33	0.11	115	165	140	0.45	0.0168	AMD1_1426	176	236.333	528	709
AMD1_1427	ABC-type multidrug transport system, ATPase and permease components	1376012	1377817	1806	-1	535	906	720	0.74	5.14e-08	499	1639	1069	1.7	8.16e-37	1590	827	1209	-0.92	1.52e-12	AMD1_1427	883	96.3333	2649	289
AMD1_1428	50S ribosomal protein L31	1378006	1378227	222	1	7685	10400	9038	0.42	0.000957	7178	9930	8554	0.44	0.0117	9626	9489	9557	-0.0171	0.94	AMD1_1428	10139.7	105	30419	315
AMD1_1429	HTH-type transcriptional repressor KstR	1378449	1379111	663	-3	149	124	136	-0.24	0.33	139	119	129	-0.21	0.41	115	113	114	-0.0126	0.97	AMD1_1429	121	31.6667	363	95
AMD1_1430	NAD(P)H azoreductase	1379174	1380019	846	2	34	24	29	-0.36	0.33	32	35	33	0.11	0.78	34	22	28	-0.35	0.19	AMD1_1430	23.6667	23.6667	71	71
AMD1_1431	Putative integral membrane protein	1380016	1380507	492	1	27	23	25	-0.16	0.7	25	27	26	0.0873	0.84	27	21	24	-0.15	0.56	AMD1_1431	22.6667	129	68	387
AMD1_1432	D-alanine--D-alanine ligase A	1380553	1381629	1077	-2	1306	965	1135	-0.42	6.23e-05	1219	1349	1284	0.14	0.37	1308	882	1095	-0.54	3.1e-05	AMD1_1432	941	38.3333	2823	115
AMD1_1433	SelT/selW/selH selenoprotein domain protein	1381765	1382076	312	-2	636	730	683	0.19	0.19	594	650	622	0.13	0.55	631	667	649	0.0647	0.75	AMD1_1433	712.333	22.3333	2137	67
AMD1_1434	RDD domain-containing protein	1382073	1382828	756	-3	2168	2123	2146	-0.0285	0.91	2024	1804	1914	-0.16	0.42	1749	1940	1845	0.12	0.5	AMD1_1434	2063	51.3333	6189	154
AMD1_1435	putative transcriptional regulatory protein AMD1_v1_1435	1382948	1383697	750	-1	2800	2838	2819	0.0187	0.93	2615	2866	2740	0.13	0.53	2779	2591	2685	-0.086	0.66	AMD1_1435	2769.33	22	8308	66
AMD1_1436	conserved exported protein of unknown function	1383864	1384670	807	3	58	40	49	-0.47	0.12	55	48	51	-0.16	0.65	47	37	42	-0.21	0.42	AMD1_1436	39	231.667	117	695
AMD1_1437	putative membrane-associated diguanylate cyclase	1384678	1386114	1437	-2	1348	1050	1199	-0.34	0.0302	1259	491	875	-1.34	2.17e-22	476	960	718	0.97	5.84e-09	AMD1_1437	1020	44	3060	132
AMD1_1438	Glutathione S-transferase	1386309	1387046	738	-3	56	59	58	0.0539	0.89	53	61	57	0.18	0.58	59	54	57	-0.0792	0.77	AMD1_1438	58	39.3333	174	118
AMD1_1439	Uncharacterized HTH-type transcriptional regulator YkvN	1387143	1387487	345	3	249	252	251	0.0102	0.97	233	214	223	-0.12	0.6	207	230	219	0.12	0.52	AMD1_1439	245.667	18	737	54
AMD1_1440	transcriptional regulator (ArsR family)	1387509	1387832	324	-3	54	83	69	0.55	0.0323	51	83	67	0.64	0.0192	81	76	78	-0.056	0.83	AMD1_1440	81.3333	30.3333	244	91
AMD1_1441	conserved protein of unknown function	1387883	1388368	486	2	159	163	161	0.034	0.9	148	181	165	0.26	0.29	176	149	163	-0.19	0.38	AMD1_1441	159.333	2.66667	478	8
AMD1_1442	conserved protein of unknown function	1388380	1388742	363	1	140	166	153	0.23	0.31	130	167	149	0.32	0.2	161	151	156	-0.0656	0.79	AMD1_1442	162	10.3333	486	31
AMD1_1443	Replicative DNA helicase	1388794	1389504	711	-2	91	86	89	-0.0647	0.86	85	85	85	-0.00405	0.99	82	79	81	-0.0393	0.89	AMD1_1443	83.6667	77.6667	251	233
AMD1_1444	Membrane protein TerC, possibly involved in tellurium resistance	1389726	1390487	762	-3	508	546	527	0.0973	0.68	474	530	502	0.15	0.52	514	499	507	-0.0356	0.88	AMD1_1444	534.333	57.3333	1603	172
AMD1_1445	2',3'-cyclic-nucleotide 2'-phosphodiesterase	1390596	1391420	825	-3	1271	1334	1302	0.0654	0.77	1186	1517	1352	0.34	0.00772	1471	1218	1345	-0.24	0.13	AMD1_1445	1296	44	3888	132
AMD1_1446	5-formyltetrahydrofolate cyclo-ligase	1391429	1392016	588	-1	921	835	878	-0.14	0.44	860	998	929	0.2	0.26	968	763	865	-0.3	0.0688	AMD1_1446	812	19	2436	57
AMD1_1447	protein of unknown function	1392124	1392357	234	1	163	154	159	-0.0751	0.78	152	131	142	-0.2	0.37	127	141	134	0.12	0.59	AMD1_1447	150.333	1150	451	3450
AMD1_1448	protein of unknown function	1392399	1392617	219	3	323	342	332	0.0708	0.8	301	326	314	0.1	0.69	316	312	314	-0.0166	0.94	AMD1_1448	332.667	12.6667	998	38
AMD1_1449	ATPase associated with various cellular activities, AAA_5	1392607	1393446	840	1	1248	1294	1271	0.05	0.77	1165	1115	1140	-0.061	0.74	1081	1182	1132	0.11	0.46	AMD1_1449	1261	39	3783	117
AMD1_1450	Ribosomal-protein-alanine acetyltransferase	1393713	1394159	447	3	120	135	128	0.14	0.57	112	212	162	0.86	0.000133	205	123	164	-0.65	0.00275	AMD1_1450	131.333	313.333	394	940
AMD1_1451	Lysozyme M1	1394198	1395283	1086	-1	4038	3097	3567	-0.36	0.0277	3770	3210	3490	-0.22	0.14	3112	2829	2971	-0.12	0.49	AMD1_1451	3008.33	46	9025	138
AMD1_1452	conserved protein of unknown function	1394910	1395344	435	3	17	9.9	14	-0.53	0.22	16	17	17	0.0362	0.94	16	9.04	13	-0.35	0.19	AMD1_1452	9.66667	1722.33	29	5167
AMD1_1453	membrane protein of unknown function	1395527	1396441	915	2	773	589	681	-0.37	0.0336	721	667	694	-0.11	0.64	647	538	592	-0.22	0.21	AMD1_1453	573	190	1719	570
AMD1_1454	VWA domain containing CoxE-like protein	1396460	1397650	1191	2	678	639	659	-0.0813	0.67	633	633		0.00059	1	614	584	599	-0.0638	0.74	AMD1_1454	622.667	33.6667	1868	101
AMD1_1455	methionine sulfoxide reductase B	1397748	1398152	405	3	354	308	331	-0.18	0.41	330	316	323	-0.055	0.85	307	282	294	-0.0979	0.66	AMD1_1455	301.667	60.6667	905	182
AMD1_1456	conserved protein of unknown function	1398245	1398607	363	-1	1214	1635	1425	0.41	0.00276	1134	2193	1663	0.93	1.44e-10	2127	1494	1810	-0.48	0.000316	AMD1_1456	1593.67	168	4781	504
AMD1_1457	conserved protein of unknown function	1398680	1398940	261	-1	1887	2330	2108	0.29	0.0221	1763	2880	2321	0.68	5.96e-05	2794	2128	2461	-0.35	0.0323	AMD1_1457	2271	20.3333	6813	61
AMD1_1458	conserved protein of unknown function	1399079	1399387	309	-1	375	293	334	-0.32	0.16	350	316	333	-0.14	0.55	307	268	287	-0.16	0.4	AMD1_1458	286.333	13.6667	859	41
AMD1_1459	N-formylglutamate deformylase	1399399	1400196	798	-2	442	363	402	-0.27	0.15	412	479	445	0.2	0.3	464	331	398	-0.45	0.00232	AMD1_1459	353.667	35	1061	105
AMD1_1460	protein of unknown function	1400193	1400591	399	-3	135	109	122	-0.28	0.22	126	170	148	0.4	0.0831	164	99	132	-0.64	0.00319	AMD1_1460	105.667	1645	317	4935
AMD1_1461	Putative integral membrane protein	1400440	1400928	489	1	6302	4157	5230	-0.58	6.62e-05	5885	5247	5566	-0.16	0.25	5088	3798	4443	-0.38	0.00965	AMD1_1461	4038.33	67	12115	201
AMD1_1462	Pyruvate kinase	1400925	1402361	1437	3	10600	9226	9922	-0.19	0.16	9916	10100	10000	0.0295	0.87	9820	8427	9124	-0.2	0.14	AMD1_1462	8979	136.667	26937	410
AMD1_1463	2-hydroxy-6-oxononadienedioate/2-hydroxy-6-oxononatrienedioate hydrolase	1402440	1403498	1059	-3	152	193	172	0.32	0.0976	142	169	155	0.24	0.3	164	176	170	0.0772	0.73	AMD1_1463	188	239.667	564	719
AMD1_1464	Putative PEP-CTERM system TPR-repeat lipoprotein	1403651	1404232	582	-1	1288	1536	1412	0.23	0.26	1202	1615	1409	0.41	0.00364	1566	1404	1485	-0.13	0.48	AMD1_1464	1490.33	64.6667	4471	194
AMD1_1465	LprI domain-containing protein	1404681	1405088	408	3	384	481	432	0.31	0.0342	358	323	341	-0.14	0.46	313	439	376	0.45	0.0024	AMD1_1465	468.667	189.667	1406	569
AMD1_1466	N5-carboxyaminoimidazole ribonucleotide synthase	1405095	1406177	1083	-3	1852	1959	1905	0.0781	0.65	1729	2327	2028	0.41	0.0181	2257	1789	2023	-0.29	0.068	AMD1_1466	1912	242.333	5736	727
AMD1_1467	N(5)-carboxyaminoimidazole ribonucleotide mutase	1406174	1406680	507	-1	1364	1142	1253	-0.24	0.14	1273	1480	1377	0.21	0.21	1436	1044	1240	-0.42	0.00585	AMD1_1467	1110.67	31.3333	3332	94
AMD1_1468	conserved protein of unknown function	1406758	1406961	204	-2	4271	3759	4015	-0.17	0.36	3988	3300	3644	-0.26	0.12	3201	3434	3317	0.0831	0.67	AMD1_1468	3654	24.3333	10962	73
AMD1_1469	protein of unknown function	1407072	1407374	303	-3	125	85	105	-0.49	0.0304	116	38	77	-1.57	3.9e-10	37	78	57	0.96	0.00061	AMD1_1469	83	21201.7	249	63605
AMD1_1470	HTH-type transcriptional regulator	1407558	1407842	285	-3	229	249	239	0.11	0.68	214	258	236	0.25	0.26	251	228	239	-0.1	0.66	AMD1_1470	242.667	239.333	728	718
AMD1_1471	Putative MFS-type transporter YcaD	1407908	1409161	1254	-1	365	269	317	-0.41	0.0154	341	370	355	0.11	0.58	358	246	302	-0.49	0.00471	AMD1_1471	263.333	30.6667	790	92
AMD1_1472	Putative small protein containing a coiled-coil domain protein	1409234	1409428	195	-1	454	484	469	0.0816	0.77	424	577	500	0.41	0.0629	560	442	501	-0.28	0.14	AMD1_1472	470.333	5.66667	1411	17
AMD1_1473	Quinone oxidoreductase 1	1409544	1410554	1011	3	467	517	492	0.14	0.42	437	471	454	0.11	0.58	457	473	465	0.0421	0.82	AMD1_1473	504.333	23.6667	1513	71
AMD1_1474	protein of unknown function	1410683	1411096	414	2	103	95	99	-0.0889	0.8	96	118	107	0.25	0.37	114	87	101	-0.28	0.22	AMD1_1474	92.6667	1.66667	278	5
AMD1_1475	conserved protein of unknown function	1410704	1411000	297	-1																AMD1_1475	1	55.3333	3	166
AMD1_1476	protein of unknown function	1411354	1411608	255	1	23	18	20	-0.23	0.59	21	28	25	0.32	0.39	27	16	22	-0.42	0.14	AMD1_1476	17.3333	20.3333	52	61
AMD1_1477	Putative ATP-dependent endonuclease of the OLD family	1411649	1413400	1752	2	817	772	794	-0.0785	0.64	763	739	751	-0.0422	0.84	717	705	711	-0.0221	0.91	AMD1_1477	753	309.667	2259	929
AMD1_1478	putative DNA helicase	1413397	1415124	1728	1	1423	1512	1467	0.083	0.61	1329	1238	1283	-0.0993	0.56	1200	1381	1291	0.18	0.2	AMD1_1478	1473.33	92	4420	276
AMD1_1479	protein of unknown function	1415316	1415954	639	3	142	113	128	-0.29	0.24	133	109	121	-0.25	0.38	106	104	105	-0.0171	0.96	AMD1_1479	110	2.33333	330	7
AMD1_1480	protein of unknown function	1415582	1415791	210	-1																AMD1_1480	0.666667	5	2	15
AMD1_1481	putative Histidine kinase	1415809	1416966	1158	1	240	219	229	-0.12	0.68	224	218	221	-0.0374	0.89	212	200	206	-0.0561	0.82	AMD1_1481	212.333	5	637	15
AMD1_1482	Transcriptional regulatory protein FixJ	1416991	1417623	633	1	125	101	113	-0.27	0.29	117	103	110	-0.16	0.55	100	93	96	-0.0756	0.76	AMD1_1482	98.6667	6.33333	296	19
AMD1_1483	conserved exported protein of unknown function	1417738	1418226	489	1	136	115	125	-0.21	0.44	127	204	165	0.62	0.00911	197	105	151	-0.83	0.00014	AMD1_1483	111.667	8.66667	335	26
AMD1_1484	conserved protein of unknown function	1418452	1419144	693	1	2109	1984	2046	-0.0846	0.63	1969	2229	2099	0.17	0.39	2163	1812	1987	-0.22	0.17	AMD1_1484	1933.67	19.6667	5801	59
AMD1_1485	Demethylmenaquinone methyltransferase	1419324	1420127	804	3	92	67	79	-0.42	0.091	86	98	92	0.16	0.56	95	61	78	-0.54	0.0168	AMD1_1485	65	18.3333	195	55
AMD1_1486	GFA domain-containing protein	1420182	1420616	435	-3	112	77	94	-0.48	0.0478	104	139	121	0.37	0.13	134	70	102	-0.85	0.000223	AMD1_1486	75.3333	29.6667	226	89
AMD1_1487	HTH domain protein	1420775	1421491	717	-1	109	102	105	-0.083	0.79	101	72	87	-0.46	0.0581	69	93	81	0.33	0.14	AMD1_1487	99.3333	16	298	48
AMD1_1488	Putative protease YdeA	1421676	1422287	612	-3	89	66	78	-0.34	0.32	83	46	65	-0.77	0.00833	45	60	53	0.26	0.32	AMD1_1488	64	7	192	21
AMD1_1489	conserved protein of unknown function	1422314	1422487	174	-1	60	38	49	-0.55	0.0955	56	37	47	-0.5	0.14	36	35	35	-0.0223	0.94	AMD1_1489	37.3333	2	112	6
AMD1_1490	Glucose 1-dehydrogenase 3	1422628	1423413	786	-2	394	418	406	0.0787	0.69	368	338	353	-0.12	0.59	327	382	355	0.19	0.32	AMD1_1490	407	13.3333	1221	40
AMD1_1491	Transcriptional repressor FrmR	1423587	1423859	273	3	811	900	855	0.13	0.66	757	896	827	0.23	0.16	869	822	846	-0.0593	0.81	AMD1_1491	874.333	8	2623	24
AMD1_1492	Cobalt-zinc-cadmium resistance protein CzcD	1423856	1424827	972	2	2339	2875	2607	0.26	0.31	2184	2867	2525	0.37	0.0226	2779	2627	2703	-0.0602	0.8	AMD1_1492	2796.67	50.6667	8390	152
AMD1_1493	putative Glutathione transferase	1424859	1425509	651	-3	26	30	28	0.16	0.7	25	22	23	-0.11	0.8	21	28	25	0.19	0.47	AMD1_1493	29.6667	521	89	1563
AMD1_1494	3-demethylubiquinone-9 3-methyltransferase	1425745	1426224	480	1	183	123	153	-0.53	0.00825	171	137	154	-0.3	0.2	132	113	123	-0.17	0.46	AMD1_1494	120	15.3333	360	46
AMD1_1495	Putative acetyltransferase	1426289	1426738	450	-1	74	74		0.000171	1	69	66	68	-0.0387	0.92	64	68	66	0.0346	0.9	AMD1_1495	72	42	216	126
AMD1_1496	conserved protein of unknown function	1426774	1427196	423	-2	140	127	133	-0.12	0.64	131	103	117	-0.31	0.17	100	116	108	0.16	0.45	AMD1_1496	123.667	20.6667	371	62
AMD1_1497	conserved protein of unknown function	1427196	1427420	225	-3	25	29	27	0.15	0.72	23	19	21	-0.18	0.67	19	26	23	0.21	0.41	AMD1_1497	28.3333	41.3333	85	124
AMD1_1498	conserved protein of unknown function	1427465	1427875	411	-1	119	108	114	-0.12	0.67	111	78	95	-0.45	0.0657	76	99	87	0.27	0.23	AMD1_1498	105.667	23.6667	317	71
AMD1_1499	Transcriptional regulator, ArsR family	1427872	1428195	324	-2	169	148	159	-0.18	0.44	158	123	141	-0.33	0.14	119	135	127	0.13	0.53	AMD1_1499	144.333	12.6667	433	38
AMD1_1500	Multi antimicrobial extrusion protein (Na(+)/drug antiporter), MATE family of MDR efflux pumps	1428408	1429805	1398	-3	748	736	742	-0.0228	0.91	698	598	648	-0.21	0.21	580	672	626	0.19	0.23	AMD1_1500	717.333	63.3333	2152	190
AMD1_1501	protein of unknown function	1429995	1430162	168	-3	79	71	75	-0.12	0.77	74	73	73	-0.0295	0.94	70	65	68	-0.0657	0.81	AMD1_1501	69	36	207	108
AMD1_1502	Cys-tRNA(Pro)/Cys-tRNA(Cys) deacylase YbaK	1430214	1430687	474	3	345	368	356	0.0851	0.7	322	333	328	0.0445	0.85	323	336	329	0.0466	0.81	AMD1_1502	358.667	70.6667	1076	212
AMD1_1503	Putative membrane protein	1430694	1432346	1653	-3	596	565	580	-0.0754	0.68	557	363	460	-0.6	3.44e-05	352	516	434	0.51	0.000379	AMD1_1503	550	143	1650	429
AMD1_1504	protein of unknown function	1432237	1432515	279	1	-	-			-	8.16	9.46	8.81	0.12	0.8	9.18	4.99	7.09	-0.21	0.33	AMD1_1504	5.33333	230.667	16	692
AMD1_1505	cytidine/deoxycytidylate deaminase family protein	1432646	1433116	471	-1	403	318	361	-0.31	0.2	377	128	253	-1.52	1.7e-12	124	290	207	1.17	8.29e-09	AMD1_1505	308.333	46.6667	925	140
AMD1_1506	Acetyl-coenzyme A synthetase	1433233	1435140	1908	-2	1071	961	1016	-0.13	0.7	1000	389	695	-1.3	8.25e-07	377	878	627	1.18	4.52e-11	AMD1_1506	937.333	106.667	2812	320
AMD1_1507	conserved protein of unknown function	1435392	1435562	171	3	81	84	83	0.0468	0.89	76	87	82	0.17	0.57	85	77	81	-0.0879	0.73	AMD1_1507	82	7.66667	246	23
AMD1_1508	putative membrane transporter protein	1435559	1436314	756	-1	80	105	92	0.36	0.14	74	57	66	-0.35	0.22	55	96	76	0.69	0.00437	AMD1_1508	102.667	65	308	195
AMD1_1509	conserved protein of unknown function	1436477	1436716	240	2	150	181	165	0.24	0.32	140	170	155	0.25	0.3						AMD1_1509	175.667	137	527	411
AMD1_1510	conserved protein of unknown function	1436815	1436991	177	1	320	176	248	-0.83	7.58e-06	299	254	276	-0.22	0.27	246	161	203	-0.54	0.00604	AMD1_1510	170.667	6	512	18
AMD1_1511	SSU ribosomal protein S16p	1437215	1437391	177	2	724	679	701	-0.0887	0.62	676	612	644	-0.14	0.47	593	620	607	0.0522	0.79	AMD1_1511	661	67	1983	201
AMD1_1512	conserved protein of unknown function	1437456	1437710	255	-3	239	245	242	0.0345	0.89	223	243	233	0.12	0.65	236	224	230	-0.0632	0.79	AMD1_1512	238.333	358.667	715	1076
AMD1_1513	conserved membrane protein of unknown function	1437875	1438330	456	2	444	412	428	-0.1	0.63	414	410	412	-0.0157	0.95	398	376	387	-0.0656	0.74	AMD1_1513	401.333	5.66667	1204	17
AMD1_1514	conserved exported protein of unknown function	1438386	1438805	420	3	264	217	241	-0.26	0.18	246	234	240	-0.0664	0.79	227	198	213	-0.16	0.41	AMD1_1514	212.333	16	637	48
AMD1_1515	membrane protein of unknown function	1438870	1439202	333	-2	110	113	111	0.0422	0.89	102	178	140	0.75	0.000744	172	103	138	-0.65	0.00337	AMD1_1515	110	249	330	747
AMD1_1516	putative fructose-bisphosphate aldolase class 1	1439435	1440460	1026	-1	2586	3476	3031	0.41	0.00163	2415	3804	3110	0.63	0.000141	3689	3174	3431	-0.18	0.3	AMD1_1516	3391.33	89	10174	267
AMD1_1517	phosphoglycerate kinase	1440730	1442103	1374	-2	904	956	930	0.0775	0.71	844	1011	928	0.25	0.17	980	873	927	-0.14	0.4	AMD1_1517	934.333	34	2803	102
AMD1_1518	Glyoxalase-like domain protein	1442184	1442612	429	3	200	184	192	-0.11	0.71	187	118	152	-0.63	0.00564	114	168	141	0.47	0.0246	AMD1_1518	180	88.3333	540	265
AMD1_1519	K(+)/H(+) antiporter NhaP	1442699	1444567	1869	-1	615	392	503	-0.63	3.53e-06	574	850	712	0.54	0.00043	824	358	591	-1.17	6.36e-15	AMD1_1519	382.667	63	1148	189
AMD1_1520	D-erythrose-4-phosphate dehydrogenase	1444759	1445769	1011	-2	2401	4353	3377	0.83	9.85e-07	2242	5366	3804	1.22	5.74e-11	5202	3974	4588	-0.32	0.12	AMD1_1520	4268	91.3333	12804	274
AMD1_1521	transketolase 1	1445794	1447782	1989	-2	2472	3578	3025	0.51	0.000293	2308	4703	3506	0.99	3.4e-09	4560	3267	3913	-0.42	0.015	AMD1_1521	3499.33	77.6667	10498	233
AMD1_1522	conserved protein of unknown function	1448066	1448338	273	2	2189	2095	2142	-0.0611	0.72	2044	1917	1981	-0.0894	0.61	1859	1913	1886	0.0366	0.84	AMD1_1522	2039.67	9	6119	27
AMD1_1523	Cell division protein ZapA	1448340	1448708	369	3	1238	1063	1150	-0.21	0.24	1156	1047	1102	-0.14	0.41	1016	971	994	-0.0546	0.79	AMD1_1523	1033	20	3099	60
AMD1_1524	RNA polymerase sigma factor RpoH	1448803	1449702	900	-2	1020	983	1002	-0.0472	0.89	952	1336	1144	0.45	0.0422	1296	898	1097	-0.45	0.0283	AMD1_1524	964.333	31.3333	2893	94
AMD1_1525	Uncharacterized RNA pseudouridine synthase YlyB	1449889	1450917	1029	-2	430	434	432	0.0135	0.96	401	477	439	0.24	0.23	462	396	429	-0.19	0.26	AMD1_1525	423.667	295	1271	885
AMD1_1526	conserved protein of unknown function	1450942	1451322	381	1	394	602	498	0.6	1.1e-05	368	1064	716	1.5	1.74e-16	1032	550	791	-0.86	1.3e-06	AMD1_1526	586.333	250.333	1759	751
AMD1_1527	Glyoxalase family protein	1451319	1451738	420	3	286	361	323	0.31	0.0685	267	728	497	1.42	2.03e-22	706	329	518	-1.07	1.34e-14	AMD1_1527	351.333	24.6667	1054	74
AMD1_1528	conserved protein of unknown function	1452115	1452339	225	-2	-	-			-	7.74	12	9.91	0.37	0.4	12	7.24	9.47	-0.2	0.38	AMD1_1528	7.66667	276.667	23	830
AMD1_1529	conserved membrane protein of unknown function	1452554	1453048	495	-1	935	803	869	-0.21	0.26	874	1003	938	0.19	0.34	972	734	853	-0.35	0.0471	AMD1_1529	781.667	122.333	2345	367
AMD1_1530	conserved exported protein of unknown function	1453464	1453838	375	-3	1162	723	943	-0.66	1.39e-05	1086	1070	1078	-0.0206	0.94	1037	660	849	-0.59	0.00136	AMD1_1530	703	6.66667	2109	20
AMD1_1531	GFA domain-containing protein	1453999	1454496	498	-2	325	241	283	-0.4	0.0616	303	158	231	-0.89	0.000258	153	220	187	0.44	0.042	AMD1_1531	235.667	24	707	72
AMD1_1532	conserved protein of unknown function	1454774	1454950	177	2	43	17	30	-1.15	0.00885	40	14	27	-1.17	0.0122	14	15	15	0.0193	0.94	AMD1_1532	16	18	48	54
AMD1_1533	conserved protein of unknown function	1455039	1455479	441	-3	115	105	110	-0.13	0.66	108	75	91	-0.48	0.0511	73	96	84	0.3	0.18	AMD1_1533	102	34	306	102
AMD1_1534	Exodeoxyribonuclease III	1455661	1456431	771	-2	93	82	87	-0.15	0.68	87	51	69	-0.69	0.0161	49	75	62	0.43	0.0901	AMD1_1534	79.3333	51	238	153
AMD1_1535	Alpha/beta hydrolase	1456448	1457086	639	-1	211	184	197	-0.17	0.54	197	95	146	-1	1.12e-05	92	168	130	0.78	0.000635	AMD1_1535	179	11.6667	537	35
AMD1_1536	Putative PEP-CTERM system TPR-repeat lipoprotein	1457087	1458169	1083	-1	422	313	368	-0.4	0.0423	394	176	285	-1.14	2.28e-12	171	286	228	0.67	0.000668	AMD1_1536	304.333	10.6667	913	32
AMD1_1537	Non-homologous end joining protein Ku	1458166	1459038	873	-2	1210	811	1010	-0.55	0.000188	1130	550	840	-1.01	6.38e-11	534	741	637	0.44	0.00114	AMD1_1537	790	47.3333	2370	142
AMD1_1538	ATP-dependent DNA ligase clustered with Ku protein, LigD	1459069	1461522	2454	-2	964	795	879	-0.26	0.12	900	480	690	-0.88	4.47e-08	466	726	596	0.6	0.000162	AMD1_1538	775.333	95.3333	2326	286
AMD1_1539	conserved protein of unknown function	1461527	1461769	243	-1	346	344	345	-0.00863	0.98	323	207	265	-0.59	0.0105	201	315	258	0.59	0.000861	AMD1_1539	335	6.66667	1005	20
AMD1_1540	protein of unknown function	1461712	1461915	204	-2	240	256	248	0.0794	0.81	224	160	192	-0.45	0.0648	155	234	194	0.53	0.00465	AMD1_1540	249	29.3333	747	88
AMD1_1541	conserved protein of unknown function	1461973	1462275	303	1	232	277	254	0.23	0.26	217	318	268	0.52	0.00318	309	253	281	-0.25	0.14	AMD1_1541	270	30	810	90
AMD1_1542	conserved protein of unknown function	1462309	1462710	402	-2	60	64	62	0.0739	0.84	56	60	58	0.0756	0.84	58	58	58	0.00562	0.99	AMD1_1542	62	174.333	186	523
AMD1_1543	Opacity protein antigen	1462943	1463581	639	2	171	141	156	-0.25	0.27	159	167	163	0.0601	0.83	162	129	145	-0.27	0.17	AMD1_1543	137.333	16.6667	412	50
AMD1_1544	conserved exported protein of unknown function	1463776	1464126	351	1	484	505	494	0.0534	0.86	452	479	465	0.0732	0.8	464	461	463	-0.0063	0.99	AMD1_1544	490.667	11	1472	33
AMD1_1545	conserved exported protein of unknown function	1464408	1464950	543	-3	62	79	71	0.29	0.34	58	57	57	-0.0343	0.93	55	73	64	0.28	0.25	AMD1_1545	77	19	231	57
AMD1_1546	conserved protein of unknown function	1465200	1465427	228	-3	2208	1258	1733	-0.77	5.1e-05	2062	477	1269	-2.08	3.5e-27	462	1149	805	1.27	6.02e-11	AMD1_1546	1229.33	12.6667	3688	38
AMD1_1547	Autoinducer 2-degrading protein LsrG	1466225	1466581	357	2	350	372	361	0.0848	0.71	327	279	303	-0.22	0.27	270	340	305	0.28	0.1	AMD1_1547	363.667	18	1091	54
AMD1_1548	Histidine kinase	1466708	1469647	2940	2	2938	2710	2824	-0.11	0.6	2744	2025	2385	-0.42	0.0221	1964	2476	2220	0.29	0.0928	AMD1_1548	2634.33	77.6667	7903	233
AMD1_1549	Phosphate ABC transporter, periplasmic phosphate-binding protein PstS (TC 3.A.1.7.1)	1470064	1471101	1038	1	827	777	802	-0.0873	0.65	772	976	874	0.32	0.11	947	709	828	-0.36	0.0399	AMD1_1549	758.667	39	2276	117
AMD1_1550	Phosphate transport system permease protein PstC (TC 3.A.1.7.1)	1471204	1472670	1467	1	506	495	501	-0.0286	0.91	472	564	518	0.24	0.14	547	453	500	-0.23	0.19	AMD1_1550	482.667	73	1448	219
AMD1_1551	Phosphate transport system permease protein PstA (TC 3.A.1.7.1)	1472667	1473983	1317	3	691	652	671	-0.0804	0.69	645	705	675	0.12	0.52	683	595	639	-0.17	0.34	AMD1_1551	636	44	1908	132
AMD1_1552	phosphate ABC transporter ATP binding subunit	1474008	1474829	822	3	671	571	621	-0.22	0.13	627	583	605	-0.0962	0.64	565	521	543	-0.1	0.59	AMD1_1552	557	23.3333	1671	70
AMD1_1553	Phosphate-specific transport system accessory protein PhoU homolog	1474870	1475574	705	1	620	542	581	-0.18	0.3	579	475	527	-0.27	0.15	461	495	478	0.0826	0.67	AMD1_1553	528	30	1584	90
AMD1_1554	Phosphate regulon transcriptional regulatory protein PhoB	1475648	1476361	714	2	526	468	497	-0.16	0.37	492	448	470	-0.12	0.55	434	428	431	-0.0213	0.92	AMD1_1554	456.667	14.3333	1370	43
AMD1_1555	conserved protein of unknown function	1476639	1477061	423	3	695	371	533	-0.87	2.46e-06	649	851	750	0.37	0.0583	825	339	582	-1.25	6.35e-13	AMD1_1555	361	5.66667	1083	17
AMD1_1556	protein of unknown function	1477253	1477459	207	2	-	-			-	7.06	17	12	0.9	0.0582	16	1.55	8.92	-2.97	0.000274	AMD1_1556	1.66667	3.33333	5	10
AMD1_1557	Putative L,D-transpeptidase ErfK/SrfK	1477390	1478202	813	1	59	32	46	-0.77	0.00827	55	96	75	0.7	0.0169	93	30	61	-1.53	8.67e-07	AMD1_1557	31.6667	13.3333	95	40
AMD1_1558	conserved membrane protein of unknown function	1478278	1478739	462	1	35	26	30	-0.33	0.4	33	65	49	0.86	0.00597	63	23	43	-1.25	0.000378	AMD1_1558	24.6667	13.3333	74	40
AMD1_1559	Putative sulfite oxidase subunit YedZ	1478736	1479458	723	3	94	72	83	-0.33	0.23	88	119	104	0.4	0.11	116	66	91	-0.71	0.00217	AMD1_1559	70.3333	172.667	211	518
AMD1_1560	Xylose repressor XylR (ROK family)	1479494	1480744	1251	-1	793	640	717	-0.3	0.0415	741	507	624	-0.52	0.00686	492	585	538	0.2	0.3	AMD1_1560	623	176	1869	528
AMD1_1561	xylose ABC transporter periplasmic binding protein	1480994	1482034	1041	2	2934	2902	2918	-0.0151	0.96	2741	1233	1987	-1.12	7.92e-11	1196	2650	1923	1.12	2.98e-17	AMD1_1561	2834	68	8502	204
AMD1_1562	Xylose ABC transporter, permease protein xylH	1482174	1483526	1353	3	439	481	460	0.12	0.49	410	263	337	-0.62	8.58e-05	255	439	347	0.74	2.3e-06	AMD1_1562	469.667	31.3333	1409	94
AMD1_1563	D-xylose transport ATP-binding protein xylG	1483548	1484336	789	3	238	313	275	0.37	0.0245	222	161	191	-0.43	0.0406	156	286	221	0.82	9.28e-06	AMD1_1563	305.333	34.3333	916	103
AMD1_1564	Blue-light-activated histidine kinase	1484451	1486052	1602	3	1341	1389	1365	0.0492	0.79	1253	934	1093	-0.41	0.00631	906	1269	1088	0.45	0.00105	AMD1_1564	1353.33	64.6667	4060	194
AMD1_1565	Gly-zipper_OmpA domain-containing protein	1486132	1486377	246	-2	2834	2825	2829	-0.005	0.99	2646	1987	2317	-0.4	0.00297	1928	2581	2254	0.38	0.00792	AMD1_1565	2748	39	8244	117
AMD1_1566	conserved protein of unknown function	1486548	1486868	321	-3	113	26	70	-2.03	3.44e-08	106	28	67	-1.83	6.41e-08	27	23	25	-0.0803	0.76	AMD1_1566	25.3333	19.6667	76	59
AMD1_1567	Blue-light-activated histidine kinase	1486966	1487970	1005	-2	145	108	126	-0.38	0.14	135	86	110	-0.6	0.0118	83	98	91	0.17	0.46	AMD1_1567	105.333	81.3333	316	244
AMD1_1568	Phyllosphere-induced regulator PhyR	1488391	1489185	795	-2	497	477	487	-0.0522	0.86	464	383	423	-0.25	0.22	371	435	403	0.17	0.46	AMD1_1568	468	169.667	1404	509
AMD1_1569	protein of unknown function	1489055	1489255	201	-1	164	159	161	-0.0416	0.89	153	124	139	-0.26	0.32	120	145	133	0.18	0.43	AMD1_1569	155.333	63	466	189
AMD1_1570	NepR domain-containing protein	1489387	1489584	198	1	508	295	401	-0.76	3.88e-07	474	246	360	-0.91	6.02e-07	239	269	254	0.14	0.49	AMD1_1570	287	3.33333	861	10
AMD1_1571	ECF RNA polymerase sigma factor EcfG	1489591	1490139	549	1	828	630	729	-0.37	0.0213	773	527	650	-0.54	0.000112	511	576	543	0.15	0.41	AMD1_1571	616.667	72	1850	216
AMD1_1572	Putative transcriptional regulatory protein pdtaR	1490125	1490508	384	-2	202	276	239	0.42	0.0229	189	277	233	0.52	0.00678	268	252	260	-0.0734	0.71	AMD1_1572	268.667	318.333	806	955
AMD1_1573	cAMP-binding proteins - catabolite gene activator and regulatory subunit of cAMP-dependent protein kinases	1490642	1491403	762	2	100	72	86	-0.42	0.0823	94	67	80	-0.44	0.0838	65	66	65	0.0152	0.96	AMD1_1573	70.3333	5	211	15
AMD1_1574	Transport of quorum-sensing signal protein	1491407	1492519	1113	-1	36	22	29	-0.52	0.16	33	16	25	-0.83	0.0489	16	20	18	0.13	0.59	AMD1_1574	22	47	66	141
AMD1_1575	conserved protein of unknown function	1492641	1492967	327	3	293	184	238	-0.64	0.000193	274	142	208	-0.91	5.98e-06	138	168	153	0.23	0.27	AMD1_1575	179.333	4.33333	538	13
AMD1_1576	conserved membrane protein of unknown function	1492987	1493439	453	1	206	153	180	-0.39	0.0805	192	94	143	-1	4.93e-07	91	140	115	0.53	0.0143	AMD1_1576	150	73.3333	450	220
AMD1_1577	Blue-light-activated histidine kinase	1493444	1494883	1440	-1	944	987	966	0.0604	0.79	882	554	718	-0.65	9.79e-06	537	902	720	0.7	1.34e-05	AMD1_1577	960	88.6667	2880	266
AMD1_1578	protein of unknown function	1493735	1494931	1197	2	23	23	23	0.0241	0.96	21	18	20	-0.14	0.77	18	21	19	0.0919	0.72	AMD1_1578	22.6667	747	68	2241
AMD1_1579	conserved protein of unknown function	1495007	1495177	171	2	55	10	33	-2.22	3.34e-06	51	11	31	-2.12	8.9e-06	10	9.55	9.96	-0.0201	0.94	AMD1_1579	10.3333	9.33333	31	28
AMD1_1580	PRC-barrel domain protein	1495385	1496317	933	2	851	362	607	-1.18	3.1e-08	794	344	569	-1.15	9.69e-07	333	331	332	-0.00508	0.99	AMD1_1580	354	60.6667	1062	182
AMD1_1581	Phosphonate monoester hydrolase	1496402	1497958	1557	-1	473	553	513	0.21	0.31	442	427	434	-0.0456	0.85	414	505	459	0.24	0.19	AMD1_1581	541	85.6667	1623	257
AMD1_1582	Putative ring-cleaving dioxygenase MhqE	1498190	1499122	933	2	238	353	295	0.17	0.67	222	243	233	0.0699	0.89	236	321	279	0.0545	0.76	AMD1_1582	352.667	18.6667	1058	56
AMD1_1583	Carboxylesterase	1499133	1499753	621	3	98	175	137	0.23	0.56	92	107	100	0.11	0.83	104	160	132	0.0612	0.7	AMD1_1583	176	9.33333	528	28
AMD1_1584	N-acetyltransferase domain-containing protein	1499750	1500049	300	2	186	219	202	0.0945	0.84	174	176	175	0.0214	0.96	171	200	185	0.0387	0.86	AMD1_1584	217.667	6.33333	653	19
AMD1_1585	conserved protein of unknown function	1500390	1500800	411	3	-	-			-	9.46	13	11	0.25	0.58	13	6.79	9.73	-0.28	0.24	AMD1_1585	7.33333	33.6667	22	101
AMD1_1586	Histidine kinase	1500953	1503040	2088	-1	836	880	858	0.0722	0.7	781	570	675	-0.44	0.00329	553	804	678	0.51	0.000312	AMD1_1586	859	134.333	2577	403
AMD1_1587	Transcriptional regulatory protein OmpR	1503067	1503846	780	-2	582	617	599	0.0791	0.68	544	369	456	-0.54	0.000616	357	563	460	0.61	0.000108	AMD1_1587	600.667	211.667	1802	635
AMD1_1588	Transcriptional regulator	1504046	1504768	723	2	1616	1290	1453	-0.31	0.0138	1509	1363	1436	-0.14	0.47	1322	1179	1250	-0.14	0.42	AMD1_1588	1256.33	27	3769	81
AMD1_1589	conserved protein of unknown function	1504791	1504955	165	-3	-	-			-	9.56	8.98	9.27	-0.0594	0.91						AMD1_1589	3.66667	35.6667	11	107
AMD1_1590	conserved protein of unknown function	1505005	1505319	315	-2	598	143	371	-2.02	2.6e-18	559	224	392	-1.23	1.79e-05	217	131	174	-0.59	0.0211	AMD1_1590	140	30	420	90
AMD1_1591	L,D-transpeptidase catalytic domain	1505687	1506148	462	2	34	41	38	0.2	0.63	32	37	34	0.15	0.7	36	38	37	0.0451	0.87	AMD1_1591	40.3333	3.66667	121	11
AMD1_1592	protein of unknown function	1506174	1506626	453	-3																AMD1_1592	3	11.3333	9	34
AMD1_1593	Putrescine transport system permease protein PotH	1506642	1508522	1881	3	45	57	51	0.26	0.42	42	34	38	-0.29	0.41	33	52	42	0.51	0.0577	AMD1_1593	55.6667	43.3333	167	130
AMD1_1594	sn-glycerol-3-phosphate import ATP-binding protein UgpC 3	1508524	1509654	1131	1	64	54	59	-0.18	0.6	60	39	49	-0.54	0.0808	37	50	44	0.24	0.35	AMD1_1594	53.3333	13	160	39
AMD1_1595	conserved exported protein of unknown function	1509726	1510883	1158	3	87	90	89	0.051	0.88	81	50	66	-0.62	0.0305	49	82	65	0.63	0.0144	AMD1_1595	88	81.3333	264	244
AMD1_1596	Iron deficiency-induced protein A	1510950	1512092	1143	3	112	89	101	-0.3	0.26	105	84	94	-0.29	0.28						AMD1_1596	86.6667	33.3333	260	100
AMD1_1597	Pyrophosphatase PpaX	1512168	1512977	810	3	47	42	44	-0.11	0.79	43	29	36	-0.46	0.16	28	38	33	0.25	0.34	AMD1_1597	41	7.33333	123	22
AMD1_1598	Inositol-1-monophosphatase	1512974	1513852	879	2	53	49	51	-0.0803	0.84	49	34	42	-0.46	0.16	33	45	39	0.26	0.31	AMD1_1598	48	5	144	15
AMD1_1599	Inositol-1-monophosphatase	1513985	1514821	837	2	43	39	41	-0.096	0.82	40	42	41	0.0609	0.88	41	36	38	-0.11	0.68	AMD1_1599	38.3333	16.3333	115	49
AMD1_1600	Dual specificity phosphatase, catalytic domain	1514860	1515492	633	1	35	36	35	0.0389	0.93	32	26	29	-0.24	0.53	25	33	29	0.2	0.45	AMD1_1600	35	9.33333	105	28
AMD1_1601	Calcineurin-like phosphoesterase	1515521	1517248	1728	2	159	150	154	-0.0721	0.81	148	142	145	-0.0619	0.83						AMD1_1601	145.667	106.667	437	320
AMD1_1602	Glucose-resistance amylase regulator	1517206	1518225	1020	-2	222	228	225	0.0353	0.89	207	191	199	-0.0985	0.72	186	208	197	0.12	0.58	AMD1_1602	222.667	52.6667	668	158
AMD1_1603	NUDIX domain protein	1518379	1518858	480	-2	292	299	295	0.0334	0.89	272	340	306	0.3	0.0724	329	273	301	-0.23	0.18	AMD1_1603	292	10.3333	876	31
AMD1_1604	2-aminoethylphosphonate-binding periplasmic protein	1519053	1520078	1026	3	1991	1804	1897	-0.13	0.63	1860	788	1324	-1.2	5.81e-11	764	1647	1206	1.08	3.66e-13	AMD1_1604	1764.33	33.6667	5293	101
AMD1_1605	Sulfate transport system permease protein CysW	1520082	1522364	2283	3	1066	909	988	-0.21	0.35	996	423	709	-1.2	7.16e-10	410	830	620	0.97	1.23e-08	AMD1_1605	889	124.667	2667	374
AMD1_1606	CP4-6 prophage; ABC transporter ATP-binding protein AfuC	1522364	1523440	1077	2	528	414	471	-0.33	0.0844	493	218	356	-1.14	5.3e-11	212	378	295	0.79	1.63e-06	AMD1_1606	404.333	61.3333	1213	184
AMD1_1607	Inner membrane protein YqaA	1523544	1523981	438	-3	332	435	383	0.35	0.11	310	517	413	0.7	0.000224	501	397	449	-0.28	0.13	AMD1_1607	424	68.6667	1272	206
AMD1_1608	DNA-binding transcriptional dual regulator CueR	1524003	1524398	396	-3	1023	1236	1130	0.26	0.13	955	1606	1280	0.71	0.000103	1556	1129	1343	-0.41	0.0153	AMD1_1608	1207.67	62.3333	3623	187
AMD1_1609	Multicopper oxidase	1524514	1526043	1530	-2	2307	2692	2500	0.21	0.27	2155	3699	2927	0.74	0.000334	3586	2459	3022	-0.48	0.00782	AMD1_1609	2629.33	112	7888	336
AMD1_1610	conserved protein of unknown function	1526121	1526558	438	-3	650	815	732	0.31	0.0849	607	913	760	0.56	0.00173	885	744	815	-0.21	0.26	AMD1_1610	797.333	48.6667	2392	146
AMD1_1611	Naphthalene 1,2-dioxygenase/salicylate 5-hydroxylase systems, ferredoxin--NAD(P)(+), reductase component	1526599	1527618	1020	-2	122	116	119	-0.0657	0.84	113	164	139	0.47	0.0828	159	106	132	-0.48	0.0333	AMD1_1611	112.667	44.3333	338	133
AMD1_1612	Glutaredoxin-like protein, YruB-family	1527615	1527878	264	-3	-	-			-	9.61	22	16	0.88	0.0482	21	12	16	-0.44	0.14	AMD1_1612	12.3333	10	37	30
AMD1_1613	Cu(+) exporting P-type ATPase	1527952	1530480	2529	-2	730	841	786	0.18	0.45	681	1435	1058	1.02	5.73e-06	1391	768	1079	-0.78	0.000124	AMD1_1613	823.333	69	2470	207
AMD1_1614	Copper chaperone	1530749	1530946	198	2	2739	3004	2872	0.12	0.69	2557	5810	4184	1.12	2.18e-06	5631	2744	4188	-0.98	2.31e-07	AMD1_1614	2922	20.6667	8766	62
AMD1_1615	Alternative cytochrome c oxidase subunit 2	1531190	1532035	846	2	580	559	570	-0.0498	0.87	542	825	683	0.56	0.012	800	511	655	-0.58	0.00193	AMD1_1615	543.333	23.3333	1630	70
AMD1_1616	Alternative cytochrome c oxidase subunit 1	1532106	1533878	1773	3	254	124	189	-0.91	0.00528	236	162	199	-0.46	0.15	157	114	135	-0.34	0.15	AMD1_1616	121.667	39	365	117
AMD1_1617	Alternative cytochrome c oxidase polypeptide CoxO	1533875	1534579	705	2	82	37	59	-1.01	0.0063	77	35	56	-0.97	0.00875	34	33	34	-0.0171	0.96	AMD1_1617	35.6667	13.3333	107	40
AMD1_1618	Alternative cytochrome c oxidase polypeptide CoxP	1534591	1535313	723	1	113	44	78	-1.26	0.000186	106	49	77	-0.95	0.00693	48	40	44	-0.14	0.58	AMD1_1618	42.6667	18.3333	128	55
AMD1_1619	Putative small integral membrane protein	1535322	1535705	384	3	41	22	31	-0.73	0.07	39	28	33	-0.35	0.36	27	20	23	-0.21	0.42	AMD1_1619	21	13.6667	63	41
AMD1_1620	YbaK/EbsC protein	1535820	1536290	471	3	344	305	324	-0.17	0.43	321	213	267	-0.56	0.00619	207	278	243	0.37	0.0549	AMD1_1620	296.667	24.6667	890	74
AMD1_1621	Putative integral membrane protein	1536392	1537231	840	-1	542	519	531	-0.0581	0.84	506	265	386	-0.88	5.44e-05	257	474	366	0.82	4.46e-05	AMD1_1621	506.333	31	1519	93
AMD1_1622	Cytochrome c-550	1537497	1537892	396	3	292	260	276	-0.15	0.52	272	181	226	-0.55	0.00519	175	237	206	0.38	0.0251	AMD1_1622	253.333	26	760	78
AMD1_1623	Glucosyl-3-phosphoglycerate phosphatase	1538287	1538892	606	-2	131	184	157	0.45	0.0621	122	122	122	0.00362	0.99	118	168	143	0.43	0.0302	AMD1_1623	179.667	39.6667	539	119
AMD1_1624	sn-glycerol-3-phosphate import ATP-binding protein UgpC 1	1538892	1539989	1098	-3	109	106	108	-0.0324	0.92	102	76	89	-0.37	0.16	74	97	85	0.29	0.18	AMD1_1624	103.333	20.3333	310	61
AMD1_1625	2-aminoethylphosphonate transport system permease PhnU	1539986	1541731	1746	-1	85	102	93	0.24	0.39	79	59	69	-0.37	0.19	57	93	75	0.6	0.0117	AMD1_1625	100	12.3333	300	37
AMD1_1626	ABC-type thiamine transport system, periplasmic component	1541843	1542964	1122	-1	257	293	275	0.17	0.43	240	172	206	-0.45	0.022	167	267	217	0.63	0.000223	AMD1_1626	286	42.6667	858	128
AMD1_1627	Glv operon regulatory protein	1542983	1543819	837	-1	81	96	89	0.21	0.46	76	54	65	-0.43	0.12	52	88	70	0.62	0.00812	AMD1_1627	93.6667	8.66667	281	26
AMD1_1628	conserved protein of unknown function	1543996	1544469	474	-2	221	242	232	0.11	0.72	207	166	187	-0.29	0.22	161	221	191	0.38	0.0477	AMD1_1628	237.333	11.6667	712	35
AMD1_1629	Urea ABC transporter, permease protein UrtB	1544496	1545416	921	-3	327	428	377	0.34	0.23	305	262	283	-0.2	0.36	254	391	322	0.52	0.0178	AMD1_1629	421	80.3333	1263	241
AMD1_1630	ABC-type uncharacterized transport system, permease component	1545416	1546441	1026	-1	277	368	322	0.36	0.16	258	194	226	-0.39	0.0707	188	336	262	0.75	0.000897	AMD1_1630	361.333	47.6667	1084	143
AMD1_1631	Glucose import ATP-binding protein TsgD13	1546467	1548008	1542	-3	827	878	852	0.0728	0.83	772	542	657	-0.47	0.0186	526	801	664	0.51	0.0195	AMD1_1631	863.333	47	2590	141
AMD1_1632	Purine-binding protein BAB2_0673	1548096	1549190	1095	-3	1771	2666	2219	0.4	0.31	1655	1483	1569	-0.14	0.63	1438	2433	1936	0.66	0.00276	AMD1_1632	2622.33	75.3333	7867	226
AMD1_1633	Putative HTH-type transcriptional regulator YdfH	1549237	1550007	771	-2	658	786	722	0.22	0.43	614	543	579	-0.16	0.52	527	717	622	0.36	0.0782	AMD1_1633	770.333	22.3333	2311	67
AMD1_1634	protein of unknown function	1550040	1550177	138	3																AMD1_1634	1.33333	328.667	4	986
AMD1_1635	putative methylxanthine N7-demethylase NdmC	1550252	1551118	867	2	216	176	196	-0.27	0.29	202	147	175	-0.43	0.0259	143	161	152	0.12	0.59	AMD1_1635	172	142.667	516	428
AMD1_1636	putative methylxanthine N7-demethylase NdmC	1551146	1552051	906	2	144	131	137	-0.12	0.69	134	99	116	-0.4	0.0921	96	120	108	0.24	0.25	AMD1_1636	128.333	112.333	385	337
AMD1_1637	Phthalate dioxygenase reductase	1552095	1553861	1767	3	276	239	257	-0.18	0.5	258	189	223	-0.41	0.0526	183	218	201	0.18	0.41	AMD1_1637	234.667	34.6667	704	104
AMD1_1638	Glutathione S-transferase, unnamed subgroup	1553872	1554519	648	1	119	109	114	-0.1	0.75	111	96	104	-0.19	0.49	93	100	96	0.0686	0.79	AMD1_1638	107.333	11.6667	322	35
AMD1_1639	S-(hydroxymethyl)glutathione dehydrogenase	1554543	1555706	1164	3	167	185	176	0.14	0.53	156	133	144	-0.2	0.38	129	169	149	0.32	0.0857	AMD1_1639	180.667	10	542	30
AMD1_1640	S-formylglutathione hydrolase FrmB	1555909	1556742	834	1	633	686	660	0.11	0.53	591	714	653	0.26	0.16	693	627	660	-0.12	0.49	AMD1_1640	670	106.333	2010	319
AMD1_1641	Hydroxymethylpyrimidine/phosphomethylpyrimidine kinase	1556759	1557505	747	-1	348	432	390	0.29	0.18	325	411	368	0.31	0.16	398	394	396	-0.00894	0.98	AMD1_1641	422	211	1266	633
AMD1_1642	thiamine phosphate synthase	1557502	1558107	606	-2	339	444	391	0.36	0.0751	317	434	375	0.42	0.0311	420	405	413	-0.0417	0.85	AMD1_1642	434	26.6667	1302	80
AMD1_1643	1-deoxy-D-xylulose 5-phosphate:thiol sulfurtransferase	1558104	1558877	774	-3	406	538	472	0.37	0.092	379	505	442	0.38	0.0779	489	491	490	0.00343	0.99	AMD1_1643	526.667	100.667	1580	302
AMD1_1644	putative Sulfur carrier protein ThiS	1558881	1559078	198	-3	176	225	201	0.33	0.14	164	214	189	0.35	0.14	208	206	207	-0.0102	0.98	AMD1_1644	220.667	50	662	150
AMD1_1645	Putative thiamine biosynthesis oxidoreductase ThiO	1559062	1560051	990	-2	796	896	846	0.16	0.48	744	986	865	0.38	0.0468	956	819	887	-0.19	0.25	AMD1_1645	876	26	2628	78
AMD1_1646	phosphomethylpyrimidine synthase	1560048	1561874	1827	-3	1271	1616	1443	0.33	0.0365	1187	1692	1440	0.48	0.0118	1640	1476	1558	-0.12	0.54	AMD1_1646	1579.67	123	4739	369
AMD1_1647	protein of unknown function	1562005	1562391	387	-2	349	460	404	0.37	0.0224	325	503	414	0.54	0.0677	488	420	454	-0.13	0.6	AMD1_1647	447.333	232.667	1342	698
AMD1_1648	2-oxoisovalerate dehydrogenase subunit alpha	1562297	1563532	1236	2	727	780	753	0.0967	0.57	679	519	599	-0.37	0.0119	504	712	608	0.46	0.000687	AMD1_1648	760.333	56.6667	2281	170
AMD1_1649	2-oxoisovalerate dehydrogenase subunit beta	1563536	1564549	1014	2	378	412	395	0.12	0.54	353	313	333	-0.16	0.39	303	376	340	0.27	0.0857	AMD1_1649	402.333	16	1207	48
AMD1_1650	Lipoamide acyltransferase component of branched-chain alpha-keto acid dehydrogenase complex	1564552	1565865	1314	1	411	417	414	0.0201	0.93	383	334	358	-0.19	0.28	324	381	352	0.2	0.2	AMD1_1650	406.333	10	1219	30
AMD1_1651	lipoamide dehydrogenase	1565870	1567267	1398	2	505	590	547	0.21	0.15	472	472	472	0.00297	0.99	458	539	498	0.2	0.18	AMD1_1651	575	46.3333	1725	139
AMD1_1652	ATP synthase subunit a 2	1567554	1568303	750	3	20	34	27	0.58	0.11	19	43	31	1.02	0.00735	42	31	36	-0.23	0.38	AMD1_1652	32.6667	20.3333	98	61
AMD1_1653	Lipooligosaccharide biosynthesis protein lex-1	1568398	1569168	771	-2	159	145	152	-0.12	0.62	148	105	127	-0.47	0.0229	102	133	117	0.31	0.11	AMD1_1653	141.667	91.3333	425	274
AMD1_1654	protein of unknown function	1569167	1569388	222	2																AMD1_1654	1.33333	53.6667	4	161
AMD1_1655	protein of unknown function	1569401	1569679	279	2	189	121	155	-0.56	0.0463	176	63	120	-1.38	5.11e-05	61	111	86	0.66	0.0246	AMD1_1655	118	8.66667	354	26
AMD1_1656	Uric acid permease PucK	1569862	1571196	1335	-2	229	246	237	0.0908	0.71	214	189	202	-0.17	0.5	183	224	204	0.24	0.24	AMD1_1656	240	112	720	336
AMD1_1657	8-oxoguanine deaminase	1571252	1572604	1353	-1	57	214	135	1.87	4.46e-19	53	148	100	1.41	3.03e-08	143	195	169	0.36	0.1	AMD1_1657	207.333	64.3333	622	193
AMD1_1658	dipeptide ABC transporter ATP binding subunit DppD	1573550	1574545	996	2	-	-			-	8.96	8.22	8.59	-0.0593	0.91	7.96	7.53	7.74	-0.0201	0.94	AMD1_1658	8	15	24	45
AMD1_1659	murein tripeptide ABC transporter/oligopeptide ABC transporter ATP binding subunit OppF	1574542	1575525	984	1	-	-			-	11	12	12	0.0638	0.9	12	11	11	-0.0271	0.92	AMD1_1659	11.6667	27.3333	35	82
AMD1_1660	Glutathione-binding protein GsiB	1575578	1577215	1638	2	76	79	77	0.0595	0.86	71	57	64	-0.29	0.33	55	72	64	0.29	0.23	AMD1_1660	77.6667	29.6667	233	89
AMD1_1661	Dipeptide transport system permease protein DppB	1577280	1578230	951	3	18	16	17	-0.1	0.83	16	16	16	-0.009	0.99	16	14	15	-0.0484	0.86	AMD1_1661	15.3333	104.333	46	313
AMD1_1662	Glutathione transport system permease protein GsiD	1578238	1579191	954	1	18	16	17	-0.0749	0.87	17	13	15	-0.25	0.57	12	15	14	0.0969	0.7	AMD1_1662	16	20	48	60
AMD1_1663	Atrazine chlorohydrolase	1579191	1580711	1521	3	39	34	36	-0.16	0.68	36	32	34	-0.15	0.73	31	31	31	-0.00336	0.99	AMD1_1663	32.6667	25	98	75
AMD1_1664	N-ethylammeline chlorohydrolase	1580763	1582223	1461	3	47	44	46	-0.0871	0.83	44	28	36	-0.55	0.1	27	40	34	0.36	0.17	AMD1_1664	42.6667	68	128	204
AMD1_1665	Putative D,D-dipeptide-binding periplasmic protein DdpA	1582313	1583884	1572	-1	255	226	240	-0.16	0.53	238	214	226	-0.14	0.64						AMD1_1665	220	188.667	660	566
AMD1_1666	putative D-serine dehydratase	1583952	1585256	1305	-3	124	105	115	-0.22	0.41	116	90	103	-0.34	0.15	87	96	91	0.1	0.68	AMD1_1666	102	87.3333	306	262
AMD1_1667	D-serine dehydratase transcriptional activator	1585362	1586282	921	3	215	186	200	-0.19	0.42	201	184	192	-0.12	0.64	179	170	174	-0.0569	0.8	AMD1_1667	180.667	16	542	48
AMD1_1668	protein of unknown function	1586224	1586379	156	-2											6.58	7.2	6.89	0.0226	0.92	AMD1_1668	7.66667	26	23	78
AMD1_1669	Urea ABC transporter, urea binding protein	1586585	1587694	1110	2	2193	3640	2917	0.72	2.78e-13	2048	1278	1663	-0.66	8e-07	1239	3325	2282	1.41	1.16e-29	AMD1_1669	3548.67	59	10646	177
AMD1_1670	Aliphatic amidase regulator	1587738	1588406	669	3	1592	2769	2180	0.79	1.86e-15	1487	1042	1264	-0.5	0.000135	1011	2529	1770	1.31	4.55e-29	AMD1_1670	2698.33	108.667	8095	326
AMD1_1671	Homoserine O-acetyltransferase	1588719	1589756	1038	3	67	66	67	-0.0202	0.96	63	59	61	-0.0765	0.84	57	61	59	0.049	0.86	AMD1_1671	64.6667	60.3333	194	181
AMD1_1672	Urea ABC transporter, urea binding protein	1589839	1591086	1248	1	43	50	47	0.16	0.69	40	42	41	0.0391	0.93	41	46	43	0.084	0.76	AMD1_1672	49	63.3333	147	190
AMD1_1673	Urea ABC transporter, permease protein UrtB	1591164	1592030	867	3	37	35	36	-0.0579	0.89	35	28	31	-0.24	0.56	27	32	30	0.12	0.66	AMD1_1673	34.3333	21	103	63
AMD1_1674	Urea ABC transporter, permease protein UrtC	1592027	1593058	1032	2	42	45	43	0.0912	0.82	39	39	39	-0.0166	0.97	38	41	39	0.0783	0.77	AMD1_1674	44.3333	46.3333	133	139
AMD1_1675	Urea ABC transporter, ATPase protein UrtD	1593055	1593783	729	1	26	27	26	0.036	0.94	24	15	20	-0.48	0.23	15	24	20	0.37	0.18	AMD1_1675	26	18.3333	78	55
AMD1_1676	Urea ABC transporter, ATPase protein UrtE	1593776	1594468	693	2	173	174	173	0.00907	0.98	161	232	197	0.44	0.14	225	159	192	-0.35	0.15	AMD1_1676	169.333	18.3333	508	55
AMD1_1677	Urease accessory protein UreE 1	1594538	1594990	453	2	40	37	39	-0.0876	0.83	38	33	35	-0.15	0.7	32	34	33	0.0434	0.88	AMD1_1677	36	49.3333	108	148
AMD1_1678	protein of unknown function	1595214	1595441	228	-3	633	674	653	0.0853	0.67	591	498	544	-0.24	0.15	483	616	549	0.31	0.0487	AMD1_1678	655.333	51.3333	1966	154
AMD1_1679	protein of unknown function	1595681	1595866	186	-1	85	76	81	-0.14	0.67	79	88	84	0.12	0.68	85	70	77	-0.21	0.36	AMD1_1679	74	29.6667	222	89
AMD1_1680	Hippurate hydrolase	1596168	1597331	1164	-3	1272	1542	1407	0.27	0.0447	1188	1087	1137	-0.12	0.47	1054	1408	1231	0.38	0.00718	AMD1_1680	1507	86.6667	4521	260
AMD1_1681	D-alanyl-D-alanine carboxypeptidase	1597546	1598694	1149	1	1071	860	965	-0.31	0.00737	1000	1153	1076	0.2	0.16	1118	785	952	-0.48	0.00012	AMD1_1681	839	39.3333	2517	118
AMD1_1682	Cobalamin synthesis protein/P47K family protein	1598691	1599803	1113	3	887	779	833	-0.18	0.2	829	1095	962	0.39	0.00448	1062	712	887	-0.55	3.14e-05	AMD1_1682	759.333	32.3333	2278	97
AMD1_1683	Sulfur carrier protein TusA	1600097	1600330	234	-1	656	587	621	-0.15	0.38	612	542	577	-0.17	0.33	526	536	531	0.0244	0.9	AMD1_1683	573.333	41.3333	1720	124
AMD1_1684	conserved exported protein of unknown function	1600336	1601595	1260	-2	5932	4692	5312	-0.33	0.00737	5538	4755	5147	-0.21	0.23	4612	4286	4449	-0.091	0.61	AMD1_1684	4570	186	13710	558
AMD1_1685	Acetyl-coenzyme A carboxylase carboxyl transferase subunit alpha	1601819	1602769	951	-1	2349	2757	2553	0.22	0.054	2194	2587	2390	0.23	0.0965	2509	2518	2514	0.00431	0.98	AMD1_1685	2691.67	34	8075	102
AMD1_1686	Tyrosine recombinase XerD	1602868	1603779	912	-2	528	529	528	0.00261	0.99	493	531	512	0.1	0.59	515	483	499	-0.0775	0.69	AMD1_1686	515.333	120	1546	360
AMD1_1687	conserved protein of unknown function	1603776	1603925	150	-3	611	452	532	-0.4	0.0754	571	710	640	0.29	0.11	689	413	551	-0.67	0.000636	AMD1_1687	438.667	6.66667	1316	20
AMD1_1688	Shikimate kinase	1604058	1604681	624	3	835	809	822	-0.0421	0.84	779	1025	902	0.38	0.0124	994	739	867	-0.4	0.00367	AMD1_1688	788.333	52.6667	2365	158
AMD1_1689	3-dehydroquinate synthase	1604678	1605793	1116	2	671	748	709	0.15	0.32	626	755	691	0.26	0.11	732	683	708	-0.0871	0.63	AMD1_1689	729.333	24.3333	2188	73
AMD1_1690	Mg2 and Co2 transporter CorB family protein	1605790	1606710	921	1	823	882	852	0.0951	0.58	768	900	834	0.22	0.18	873	805	839	-0.1	0.55	AMD1_1690	860	113	2580	339
AMD1_1691	conserved protein of unknown function	1606771	1607004	234	1	225	189	207	-0.24	0.24	210	179	195	-0.22	0.29	174	172	173	-0.00933	0.98	AMD1_1691	184.333	96.6667	553	290
AMD1_1692	Ribonuclease VapC22	1607001	1607402	402	3	256	228	242	-0.16	0.46	239	234	237	-0.0308	0.92	227	208	218	-0.0951	0.67	AMD1_1692	222.333	508.667	667	1526
AMD1_1693	Cell division protein BolA	1607405	1607707	303	-1	564	501	532	-0.16	0.29	527	588	557	0.15	0.35	570	457	514	-0.29	0.0422	AMD1_1693	488	157.333	1464	472
AMD1_1694	Uncharacterized 19.0 kDa protein in cobS 5'region	1607848	1608456	609	1	1028	1126	1077	0.12	0.49	960	1236	1098	0.35	0.0145	1199	1028	1114	-0.19	0.21	AMD1_1694	1095	14.6667	3285	44
AMD1_1695	Aerobic cobaltochelatase subunit CobS	1608573	1609559	987	3	3040	3558	3299	0.22	0.13	2839	4223	3531	0.56	5.63e-05	4095	3249	3672	-0.3	0.0264	AMD1_1695	3467.67	257.667	10403	773
AMD1_1696	Aerobic cobaltochelatase subunit CobT	1609572	1611470	1899	3	4570	5017	4793	0.13	0.48	4267	6112	5190	0.5	0.000662	5927	4583	5255	-0.33	0.0229	AMD1_1696	4879	39	14637	117
AMD1_1697	Phytase-like domain-containing protein	1611467	1612486	1020	2	794	906	850	0.18	0.25	741	1021	881	0.44	0.00659	991	828	909	-0.22	0.18	AMD1_1697	881.667	20	2645	60
AMD1_1698	conserved protein of unknown function	1612483	1612905	423	1	152	160	156	0.065	0.83	142	166	154	0.21	0.33	161	146	153	-0.11	0.64	AMD1_1698	155	14.6667	465	44
AMD1_1699	Lysine 6-dehydrogenase	1613062	1614162	1101	-2	398	146	272	-1.42	6.31e-20	372	183	277	-0.99	2.04e-07	177	134	155	-0.33	0.1	AMD1_1699	142.667	39	428	117
AMD1_1700	Regulatory protein AsnC	1614284	1614712	429	2	291	217	254	-0.4	0.0155	272	255	264	-0.0839	0.77	248	198	223	-0.26	0.21	AMD1_1700	211	937.333	633	2812
AMD1_1701	putative queuosine precursor transporter	1614719	1615402	684	-1	2742	3403	3073	0.3	0.031	2561	3519	3040	0.43	0.0134	3412	3108	3260	-0.11	0.53	AMD1_1701	3322.67	103.667	9968	311
AMD1_1702	50S ribosomal protein L28	1615526	1615822	297	-1	4253	4551	4402	0.0933	0.62	3972	4921	4447	0.29	0.14	4771	4156	4464	-0.17	0.38	AMD1_1702	4445	41.3333	13335	124
AMD1_1703	conserved exported protein of unknown function	1616077	1616859	783	1	362	165	264	-1.11	3.57e-12	338	352	345	0.0526	0.85	341	151	246	-1.12	2.52e-08	AMD1_1703	160.667	28.3333	482	85
AMD1_1704	Permease of the drug/metabolite transporter (DMT) superfamily	1616874	1617770	897	3	725	675	700	-0.0987	0.56	677	634	655	-0.0922	0.63	615	617	616	0.00515	0.98	AMD1_1704	657.667	81.3333	1973	244
AMD1_1705	Cupin_5 domain-containing protein	1617767	1618204	438	-1	209	268	238	0.33	0.0542	195	205	200	0.0559	0.83	198	245	221	0.26	0.16	AMD1_1705	261	216.333	783	649
AMD1_1706	Hydroxyacylglutathione hydrolase	1618208	1618975	768	-1	581	626	603	0.1	0.54	543	458	500	-0.23	0.14	444	572	508	0.33	0.0189	AMD1_1706	610	47	1830	141
AMD1_1707	SAM-dependent methyltransferase 2, in cluster with Hydroxyacylglutathione hydrolase	1619083	1619850	768	1	263	304	284	0.2	0.32	246	253	249	0.0385	0.88	246	278	262	0.14	0.47	AMD1_1707	296	18.3333	888	55
AMD1_1708	conserved protein of unknown function	1619939	1620742	804	2	164	132	148	-0.29	0.24	153	138	146	-0.14	0.6	134	120	127	-0.12	0.59	AMD1_1708	128.333	35.6667	385	107
AMD1_1709	Lipid kinase BmrU	1620902	1621762	861	2	598	386	492	-0.6	0.000756	558	522	540	-0.0896	0.72	506	352	429	-0.45	0.0154	AMD1_1709	378	42.3333	1134	127
AMD1_1710	Spectinomycin tetracycline efflux pump	1621796	1623337	1542	-1	144	150	147	0.0418	0.89	135	160	147	0.22	0.35	155	137	146	-0.14	0.53	AMD1_1710	145.333	54	436	162
AMD1_1711	Ben and cat operon transcriptional regulator	1623472	1624329	858	1	353	356	354	0.0119	0.96	329	347	338	0.0704	0.75	337	325	331	-0.0416	0.85	AMD1_1711	346.333	85.6667	1039	257
AMD1_1712	Homoserine O-acetyltransferase	1624377	1625300	924	-3	329	263	296	-0.3	0.12	307	358	333	0.21	0.33	348	240	294	-0.48	0.00376	AMD1_1712	256.333	83	769	249
AMD1_1713	Histidinol-phosphate aminotransferase 2	1625582	1626694	1113	2	1025	1183	1104	0.2	0.25	957	1346	1151	0.47	0.00448	1305	1080	1193	-0.23	0.19	AMD1_1713	1157.33	113.333	3472	340
AMD1_1714	Cyclohexadienyl dehydrogenase	1626698	1627633	936	2	695	1015	855	0.51	0.0147	649	1171	910	0.81	5.08e-05	1135	927	1031	-0.24	0.19	AMD1_1714	994.333	90.3333	2983	271
AMD1_1715	conserved protein of unknown function	1627723	1628721	999	-2	1416	1052	1234	-0.42	0.000153	1322	1490	1406	0.16	0.29	1444	961	1203	-0.56	1.43e-05	AMD1_1715	1026	162.333	3078	487
AMD1_1716	Gamma-glutamylcyclotransferase	1628776	1629294	519	1	131	111	121	-0.22	0.36	122	123	123	0.0147	0.96	120	101	111	-0.18	0.39	AMD1_1716	108.333	18.3333	325	55
AMD1_1717	ADA regulatory protein / Methylated-DNA--protein-cysteine methyltransferase	1629366	1630421	1056	3	125	124		0.001	1	116	134	125	0.18	0.48	130	114	122	-0.14	0.53	AMD1_1717	121.333	101	364	303
AMD1_1718	2-acyl-glycerophospho-ethanolamine acyltransferase	1630418	1631206	789	-1	828	805	817	-0.0381	0.84	773	838	806	0.11	0.59	813	736	774	-0.12	0.5	AMD1_1718	785	40.6667	2355	122
AMD1_1719	conserved protein of unknown function	1631314	1632057	744	-2	1135	926	1031	-0.28	0.14	1060	973	1016	-0.12	0.53	944	846	895	-0.14	0.44	AMD1_1719	899.667	49.3333	2699	148
AMD1_1720	Cell division protein FtsX	1632120	1633133	1014	-3	908	747	827	-0.27	0.0758	848	1096	972	0.36	0.00667	1063	682	873	-0.6	2.96e-05	AMD1_1720	725.667	59.3333	2177	178
AMD1_1721	cell division protein FtsE	1633126	1633785	660	-2	1098	962	1030	-0.18	0.28	1025	1266	1146	0.29	0.0449	1228	879	1054	-0.44	0.00215	AMD1_1721	935.333	12	2806	36
AMD1_1722	conserved protein of unknown function	1633983	1634621	639	3	793	841	817	0.078	0.7	741	752	746	0.0179	0.94	729	768	749	0.0617	0.77	AMD1_1722	817.667	221.667	2453	665
AMD1_1723	Hypoxanthine-guanine phosphoribosyltransferase	1634631	1635173	543	3	668	757	712	0.17	0.27	624	824	724	0.39	0.00881	799	691	745	-0.18	0.24	AMD1_1723	738.667	24.6667	2216	74
AMD1_1724	Transcriptional regulatory protein CusR	1635243	1635644	402	3	2424	2482	2453	0.0331	0.84	2263	2250	2257	-0.00855	0.97	2182	2267	2225	0.0483	0.79	AMD1_1724	2417.67	27	7253	81
AMD1_1725	Carboxylate/amino acid/amine transporter	1635611	1636555	945	-1	74	119	96	0.62	0.0054	69	199	134	1.48	1.92e-13	193	108	151	-0.76	0.000127	AMD1_1725	115.667	727.333	347	2182
AMD1_1726	CysJI operon transcriptional activator	1636896	1637756	861	3	292	310	301	0.0817	0.71	273	270	271	-0.0164	0.96	262	283	272	0.087	0.71	AMD1_1726	302.667	16	908	48
AMD1_1727	Glutathione S-transferase	1637853	1638479	627	3	134	154	144	0.17	0.51	126	102	114	-0.27	0.32	99	140	120	0.41	0.0549	AMD1_1727	150	68.6667	450	206
AMD1_1728	Deacetylase	1638519	1641014	2496	-3	2444	1499	1972	-0.68	3.68e-06	2281	1785	2033	-0.34	0.0349	1731	1370	1550	-0.31	0.0256	AMD1_1728	1458.33	69.6667	4375	209
AMD1_1729	Diaminopimelate decarboxylase	1641415	1642683	1269	-2	1876	2103	1989	0.16	0.28	1751	1972	1862	0.16	0.31	1913	1921	1917	0.00477	0.98	AMD1_1729	2046.33	363.333	6139	1090
AMD1_1730	conserved exported protein of unknown function	1642714	1642920	207	-2	1475	1683	1579	0.18	0.31	1377	1611	1494	0.22	0.19	1563	1537	1550	-0.0206	0.93	AMD1_1730	1635.67	21.3333	4907	64
AMD1_1731	Argininosuccinate lyase 1	1642991	1644391	1401	-1	1525	1580	1553	0.0497	0.76	1424	1655	1540	0.21	0.19	1605	1443	1524	-0.14	0.39	AMD1_1731	1540.67	133.333	4622	400
AMD1_1732	Thiol:disulfide oxidoreductase TlpA	1644424	1645119	696	1	591	727	659	0.28	0.0986	552	1504	1028	1.42	5.05e-18	1459	664	1062	-1.09	4.65e-10	AMD1_1732	707.667	286	2123	858
AMD1_1733	sn-glycerol 3-phosphate ABC transporter periplasmic binding protein	1645474	1646784	1311	1	1391	1337	1364	-0.0531	0.81	1299	938	1119	-0.45	0.00641	910	1221	1065	0.39	0.00791	AMD1_1733	1306.33	102.333	3919	307
AMD1_1734	sn-glycerol 3-phosphate ABC transporter membrane subunit UgpA	1646953	1647837	885	1	393	409	401	0.054	0.81	367	230	299	-0.65	3.04e-05	223	374	299	0.7	1.99e-05	AMD1_1734	399.333	64	1198	192
AMD1_1735	sn-glycerol 3-phosphate ABC transporter membrane subunit UgpE	1648015	1648863	849	1	367	383	375	0.0552	0.82	343	194	269	-0.78	9.42e-06	188	350	269	0.83	4.9e-06	AMD1_1735	374	187.667	1122	563
AMD1_1736	sn-glycerol 3-phosphate ABC transporter ATP binding subunit	1648863	1649909	1047	3	503	433	468	-0.2	0.24	470	286	378	-0.68	2.43e-05	277	395	336	0.45	0.00887	AMD1_1736	422.667	34.3333	1268	103
AMD1_1737	Putative diguanylate cyclase AdrA	1650183	1650989	807	3	1154	1169	1161	0.0167	0.94	1078	599	838	-0.82	7.21e-06	580	1068	824	0.83	6.81e-06	AMD1_1737	1136.67	232.333	3410	697
AMD1_1738	3-hydroxybutyryl-CoA dehydrogenase	1650996	1651877	882	-3	2002	2129	2065	0.0844	0.62	1869	2061	1965	0.13	0.39	1998	1944	1971	-0.0347	0.85	AMD1_1738	2075.33	339.333	6226	1018
AMD1_1739	Electron transfer flavoprotein subunit alpha	1651987	1652916	930	-2	2065	3149	2607	0.6	3.66e-11	1928	3196	2562	0.71	9.17e-10	3099	2877	2988	-0.0975	0.5	AMD1_1739	3071	53.3333	9213	160
AMD1_1740	Electron transfer flavoprotein subunit beta	1652940	1653689	750	-3	2486	3043	2765	0.28	0.027	2321	3101	2711	0.4	0.022	3008	2779	2893	-0.0963	0.62	AMD1_1740	2968.67	20.6667	8906	62
AMD1_1741	Rhombosortase	1653910	1654698	789	-2	534	569	551	0.0843	0.65	499	512	505	0.0359	0.88	497	519	508	0.0522	0.8	AMD1_1741	553.667	55	1661	165
AMD1_1742	Corrinoid adenosyltransferase	1654737	1655318	582	-3	553	629	591	0.18	0.25	516	570	543	0.14	0.44	553	575	564	0.0467	0.8	AMD1_1742	612.667	25.3333	1838	76
AMD1_1743	HIG1 domain-containing protein	1655325	1655516	192	-3	227	241	234	0.0791	0.73	212	303	258	0.49	0.00708	294	220	257	-0.37	0.0364	AMD1_1743	234.667	20.6667	704	62
AMD1_1744	Ketoacyl reductase	1655544	1656410	867	-3	278	232	255	-0.24	0.22	260	306	283	0.22	0.28	297	212	254	-0.43	0.0128	AMD1_1744	226	191.667	678	575
AMD1_1745	Ribonuclease BN	1656476	1657327	852	2	400	464	432	0.2	0.29	373	387	380	0.0463	0.84	375	424	399	0.15	0.38	AMD1_1745	451.667	58	1355	174
AMD1_1746	Permease of the drug/metabolite transporter (DMT) superfamily	1657294	1658232	939	-2	53	64	58	0.2	0.53	50	145	97	1.48	2.04e-10	140	58	99	-1.21	4.31e-08	AMD1_1746	62	69.6667	186	209
AMD1_1747	conserved membrane protein of unknown function	1658384	1658671	288	2	1868	2456	2162	0.37	0.0374	1744	954	1349	-0.83	2.84e-05	925	2244	1584	1.22	3.37e-09	AMD1_1747	2385.67	43.3333	7157	130
AMD1_1748	Glutamyl-Q tRNA(Asp) synthetase	1658668	1659543	876	-2	249	248	248	-0.00468	0.99	232	218	225	-0.0841	0.71	212	227	219	0.0786	0.71	AMD1_1748	241.333	368	724	1104
AMD1_1749	DNA-3-methyladenine glycosylase II	1659619	1660272	654	1	378	313	346	-0.26	0.12	353	311	332	-0.17	0.42	302	286	294	-0.0567	0.8	AMD1_1749	305	70.6667	915	212
AMD1_1750	HNH endonuclease	1660391	1660948	558	2	1465	2381	1923	0.69	4.2e-12	1368	2279	1824	0.68	0.00466	2210	2175	2193	-0.0162	0.96	AMD1_1750	2319.67	296.667	6959	890
AMD1_1751	Periplasmic thiol:disulfide oxidoreductase DsbB, required for DsbA reoxidation	1661031	1661546	516	-3	629	611	620	-0.0406	0.86	587	964	775	0.69	5.11e-06	935	558	746	-0.71	1.41e-06	AMD1_1751	596.333	69.6667	1789	209
AMD1_1752	conserved membrane protein of unknown function	1661582	1662169	588	-1	608	640	624	0.0695	0.76	567	1095	831	0.92	2.56e-10	1062	585	823	-0.83	1.08e-08	AMD1_1752	624.667	59.3333	1874	178
AMD1_1753	conserved exported protein of unknown function	1662585	1663037	453	3	683	668	676	-0.0315	0.89	638	618	628	-0.0449	0.83	600	610	605	0.0225	0.91	AMD1_1753	650	117.667	1950	353
AMD1_1754	Adhesin/invasin protein PagN	1663160	1663831	672	-1	310	332	321	0.0901	0.7	289	236	263	-0.27	0.19	229	303	266	0.33	0.0756	AMD1_1754	322.667	141	968	423
AMD1_1755	Citrate utilization protein B	1664030	1665163	1134	-1	29	56	42	0.79	0.0214	27	42	34	0.49	0.18	40	51	46	0.19	0.47	AMD1_1755	54	126.667	162	380
AMD1_1756	TcuA: flavoprotein used to oxidize tricarballylate to cis-aconitate	1665160	1666581	1422	-2	49	77	63	0.55	0.0584	46	76	61	0.64	0.0228	74	71	72	-0.0415	0.88	AMD1_1756	75	42.3333	225	127
AMD1_1757	protein of unknown function	1666791	1666985	195	-3																AMD1_1757	3	5.66667	9	17
AMD1_1758	aconitate hydratase 1	1666986	1669676	2691	3	17	234	126	3.71	1.27e-41	16	202	109	3.6	6.34e-40	196	214	205	0.0964	0.66	AMD1_1758	227.333	1	682	3
AMD1_1759	putative membrane transporter protein	1669800	1670537	738	3	23	358	191	3.93	3.72e-62	21	338	179	3.94	2.05e-61						AMD1_1759	349	76.3333	1047	229
AMD1_1760	Putative HTH-type transcriptional regulator YdfH	1670589	1671248	660	-3	346	441	394	0.33	0.0378	323	433	378	0.4	0.0161	420	403	412	-0.0505	0.8	AMD1_1760	429.667	67.3333	1289	202
AMD1_1761	Membrane protein AbrB duplication	1671349	1672467	1119	1	61	96	78	0.6	0.012	57	58	57	0.0358	0.92	56	88	72	0.51	0.0285	AMD1_1761	93.3333	24.3333	280	73
AMD1_1762	protein of unknown function	1672480	1672842	363	1	133	358	245	1.41	5.22e-19	124	474	299	1.91	3.28e-27	460	327	393	-0.44	0.0114	AMD1_1762	347.667	25.3333	1043	76
AMD1_1763	Cyn operon transcriptional activator	1672760	1673671	912	2	273	493	383	0.82	1.19e-06	255	584	419	1.16	8.17e-10	566	450	508	-0.28	0.11	AMD1_1763	479.333	28.3333	1438	85
AMD1_1764	D-3-phosphoglycerate dehydrogenase	1673683	1674729	1047	1	164	180	172	0.12	0.62	154	181	167	0.21	0.35	175	164	170	-0.0687	0.76	AMD1_1764	175.333	79	526	237
AMD1_1765	Putative 4-hydroxy-4-methyl-2-oxoglutarate aldolase	1674713	1675207	495	2	179	153	166	-0.2	0.5	167	179	173	0.0846	0.79	174	140	157	-0.21	0.38	AMD1_1765	148	6.33333	444	19
AMD1_1766	3-isopropylmalate dehydrogenase	1675285	1676343	1059	-2	29	22	25	-0.31	0.44	27	31	29	0.12	0.78	30	20	25	-0.3	0.26	AMD1_1766	21	133.333	63	400
AMD1_1767	putative isomerase YbhH	1676395	1677498	1104	-2	44	39	42	-0.15	0.7	41	45	43	0.1	0.79	44	36	40	-0.17	0.49	AMD1_1767	38	46.3333	114	139
AMD1_1768	Tripartite tricarboxylate transporter TctA family protein	1677593	1679617	2025	-1	55	50	52	-0.11	0.76	51	64	58	0.26	0.38	62	46	54	-0.3	0.22	AMD1_1768	48.6667	105.667	146	317
AMD1_1769	Tripartite tricarboxylate transporter family receptor	1679759	1680859	1101	-1	63	55	59	-0.17	0.61	59	47	53	-0.28	0.37	46	50	48	0.0834	0.76	AMD1_1769	53.6667	92.6667	161	278
AMD1_1770	putative DNA-binding transcriptional regulator YbhD	1681038	1681949	912	3	207	192	200	-0.0945	0.73	194	134	164	-0.49	0.015	130	176	153	0.35	0.0819	AMD1_1770	188	86.3333	564	259
AMD1_1771	protein of unknown function	1682032	1682418	387	1	244	253	249	0.0483	0.84	228	198	213	-0.19	0.55	192	231	212	0.19	0.41	AMD1_1771	247	47	741	141
AMD1_1772	protein of unknown function	1682089	1682319	231	-2	77	39	58	-0.93	0.000328	72	57	65	-0.31	0.28	55	35	45	-0.46	0.0808	AMD1_1772	37.6667	19.3333	113	58
AMD1_1773	Stage V sporulation protein B	1682405	1683829	1425	2	892	836	864	-0.0884	0.62	832	637	735	-0.37	0.0511	617	764	691	0.26	0.15	AMD1_1773	814.333	58.6667	2443	176
AMD1_1774	Protein involved in cellulose biosynthesis (CelD)	1683829	1685109	1281	1	559	516	538	-0.11	0.58	522	376	449	-0.45	0.00904	365	471	418	0.32	0.0521	AMD1_1774	503	78	1509	234
AMD1_1775	Acetyl-coenzyme A synthetase	1685106	1686737	1632	-3	725	763	744	0.0695	0.71	677	849	763	0.31	0.0623	823	697	760	-0.21	0.18	AMD1_1775	743.333	85.3333	2230	256
AMD1_1776	conserved membrane protein of unknown function	1686851	1687585	735	-1	883	1373	1128	0.61	5.48e-05	825	771	798	-0.093	0.64	748	1254	1001	0.7	6.21e-06	AMD1_1776	1341.33	52.3333	4024	157
AMD1_1777	Antibiotic biosynthesis monooxygenase	1687902	1688234	333	3	41	39	40	-0.0594	0.89	39	42	41	0.11	0.77	41	36	39	-0.11	0.69	AMD1_1777	38	28.6667	114	86
AMD1_1778	protein translocation ATPase	1688316	1691039	2724	-3	8398	7707	8052	-0.12	0.37	7842	8452	8147	0.1	0.58	8198	7038	7618	-0.19	0.22	AMD1_1778	7524.33	113.667	22573	341
AMD1_1779	protein of unknown function	1691183	1691257	75	-1	-	-			-	10	9.68	10	-0.0594	0.91	9.38	11	10	0.073	0.76	AMD1_1779	12	445	36	1335
AMD1_1780	Foldase protein PrsA precursor	1691277	1692194	918	3	3091	3315	3203	0.097	0.52	2887	4992	3940	0.76	8.82e-06	4840	3028	3934	-0.63	0.000183	AMD1_1780	3228.67	110.333	9686	331
AMD1_1781	Homoserine/homoserine lactone efflux protein	1692383	1693015	633	2	129	144	136	0.15	0.58	120	251	185	1.02	1.27e-07	243	132	187	-0.82	2.33e-05	AMD1_1781	140	56.3333	420	169
AMD1_1782	Bacterial regulatory protein, tetR family	1693072	1693665	594	-2	254	268	261	0.0696	0.78	237	303	270	0.33	0.1	294	245	269	-0.22	0.25	AMD1_1782	262	29	786	87
AMD1_1783	conserved protein of unknown function	1693766	1693999	234	2	19	20	19	0.03	0.95	17	19	18	0.0694	0.88	18	18	18	-0.0167	0.96	AMD1_1783	19	9.33333	57	28
AMD1_1784	Glutamate N-acetyltransferase / Amino-acid acetyltransferase	1694103	1695344	1242	3	1243	1313	1278	0.0755	0.65	1161	1658	1409	0.5	0.000226	1608	1199	1403	-0.39	0.00266	AMD1_1784	1281	39.6667	3843	119
AMD1_1785	Ribosomal-protein-alanine N-acetyltransferase	1695352	1696125	774	1	663	689	676	0.0533	0.79	619	872	745	0.47	0.00241	845	630	738	-0.38	0.017	AMD1_1785	671.667	21.6667	2015	65
AMD1_1786	CTP pyrophosphohydrolase	1696127	1696540	414	2	426	403	414	-0.0749	0.73	398	544	471	0.43	0.0114	527	368	448	-0.48	0.00202	AMD1_1786	392.333	32.3333	1177	97
AMD1_1787	conserved protein of unknown function	1696644	1696958	315	3	892	867	879	-0.04	0.84	833	674	753	-0.29	0.19	654	792	723	0.22	0.25	AMD1_1787	843.333	74.6667	2530	224
AMD1_1788	Flp pilus assembly protein, pilin Flp	1697061	1697234	174	3	916	630	773	-0.51	0.000986	855	343	599	-1.28	1.18e-10	333	575	454	0.71	0.000682	AMD1_1788	611.333	60.6667	1834	182
AMD1_1789	Biotin synthesis protein bioC	1697256	1698128	873	-3	312	288	300	-0.11	0.64	292	317	304	0.11	0.57	307	263	285	-0.19	0.29	AMD1_1789	281.667	273.333	845	820
AMD1_1790	Competence protein F	1698160	1698969	810	1	304	326	315	0.0879	0.77	284	242	263	-0.22	0.25	234	298	266	0.28	0.17	AMD1_1790	316.333	52	949	156
AMD1_1791	glutaredoxin 3	1698996	1699259	264	3	1124	1028	1076	-0.12	0.6	1049	1077	1063	0.0345	0.88	1044	939	991	-0.13	0.41	AMD1_1791	1000	10	3000	30
AMD1_1792	Nitrilase/cyanide hydratase and apolipoprotein N-acyltransferase	1699275	1700141	867	3	901	1115	1008	0.29	0.13	841	995	918	0.23	0.13	965	1018	992	0.0629	0.76	AMD1_1792	1092	19.6667	3276	59
AMD1_1793	conserved protein of unknown function	1700138	1700563	426	2	616	624	620	0.0195	0.93	575	597	586	0.0532	0.81	579	570	575	-0.0204	0.93	AMD1_1793	610	11.3333	1830	34
AMD1_1794	conserved protein of unknown function	1700803	1701144	342	-2	127	141	134	0.13	0.62	119	174	146	0.51	0.00806	169	129	149	-0.32	0.09	AMD1_1794	137.667	10.3333	413	31
AMD1_1795	Ubiquinone biosynthesis O-methyltransferase	1701228	1701974	747	-3	1035	1054	1044	0.0254	0.89	966	1367	1167	0.48	0.00093	1326	963	1144	-0.43	0.00196	AMD1_1795	1027.33	30	3082	90
AMD1_1796	Aspartate kinase	1702249	1703502	1254	1	6068	5687	5878	-0.091	0.54	5666	6240	5953	0.13	0.48	6054	5194	5624	-0.19	0.25	AMD1_1796	5546.67	60.6667	16640	182
AMD1_1797	Phosphocarrier protein kinase/phosphorylase, nitrogen regulation associated	1703580	1705856	2277	3	4050	4043	4046	-0.00247	0.99	3781	4668	4225	0.29	0.0248	4527	3693	4110	-0.27	0.0338	AMD1_1797	3940.67	79.6667	11822	239
AMD1_1798	peptide chain release factor RF1	1705853	1706932	1080	2	1343	1338	1340	-0.0048	0.98	1254	1443	1348	0.19	0.3	1400	1222	1311	-0.17	0.34	AMD1_1798	1303.67	38.6667	3911	116
AMD1_1799	Release factor glutamine methyltransferase	1706925	1707779	855	3	1197	997	1097	-0.25	0.17	1117	1128	1123	0.0122	0.97	1095	911	1003	-0.22	0.24	AMD1_1799	969	25	2907	75
AMD1_1800	Eukaryotic translation initiation factor 3 subunit 10	1708086	1708904	819	3	5498	4207	4853	-0.37	0.00578	5135	4670	4902	-0.12	0.62	4529	3843	4186	-0.19	0.35	AMD1_1800	4096	144.333	12288	433
AMD1_1801	ClpB chaperone	1709125	1711731	2607	1	3117	3155	3136	0.0153	0.96	2910	3717	3314	0.33	0.1	3606	2880	3243	-0.26	0.21	AMD1_1801	3096.33	152.667	9289	458
AMD1_1802	conserved membrane protein of unknown function	1711773	1712540	768	-3	307	364	335	0.23	0.2	286	321	304	0.15	0.53	311	333	322	0.0801	0.71	AMD1_1802	354.667	697.333	1064	2092
AMD1_1803	conserved protein of unknown function	1712660	1713022	363	2	209	179	194	-0.2	0.48	195	170	182	-0.17	0.62	165	163	164	-0.0104	0.98	AMD1_1803	175.667	21.3333	527	64
AMD1_1804	L,D-transpeptidase YkuD	1713210	1714583	1374	3	2175	1273	1724	-0.76	8.7e-12	2030	2224	2127	0.12	0.53	2156	1162	1659	-0.85	3.32e-08	AMD1_1804	1242.33	55	3727	165
AMD1_1805	Beta-lactamase	1714657	1716234	1578	1	656	529	593	-0.29	0.0639	613	392	502	-0.61	0.000736	380	483	432	0.3	0.0824	AMD1_1805	516	76.3333	1548	229
AMD1_1806	Uncharacterized N-acetyltransferase YhbS	1716292	1716789	498	1	114	88	101	-0.33	0.2	106	48	77	-1.07	3.98e-05	46	80	63	0.66	0.00878	AMD1_1806	85.3333	75	256	225
AMD1_1807	conserved protein of unknown function	1716786	1717262	477	-3	84	95	90	0.16	0.58	79	71	75	-0.14	0.65	69	87	78	0.26	0.25	AMD1_1807	93	22	279	66
AMD1_1808	Transcriptional regulator, ArsR family	1717259	1717600	342	-1	65	66	66	0.0144	0.98	61	51	56	-0.21	0.54	49	60	55	0.18	0.48	AMD1_1808	64	20.3333	192	61
AMD1_1809	Uncharacterized glutathione S-transferase-like protein	1717625	1718305	681	-1	80	96	88	0.23	0.4	75	74	75	-0.00365	0.99	72	87	80	0.19	0.4	AMD1_1809	93.3333	33.6667	280	101
AMD1_1810	Spectinomycin tetracycline efflux pump	1719430	1720983	1554	1	173	194	183	0.15	0.48	161	180	170	0.15	0.52	174	177	176	0.0179	0.94	AMD1_1810	188.667	12.6667	566	38
AMD1_1811	Cyclic di-GMP phosphodiesterase Gmr	1721057	1721896	840	2	2027	1793	1910	-0.16	0.48	1893	1349	1621	-0.45	0.0626	1308	1639	1473	0.24	0.28	AMD1_1811	1739.67	80.3333	5219	241
AMD1_1812	Glycyl-glycine endopeptidase ALE-1	1721933	1723900	1968	-1	2489	2482	2486	-0.0044	0.99	2325	2709	2517	0.21	0.16	2627	2267	2447	-0.19	0.16	AMD1_1812	2419.33	200.667	7258	602
AMD1_1813	protein of unknown function	1724396	1724596	201	2																AMD1_1813	2	5.33333	6	16
AMD1_1825	protein of unknown function	1730573	1730785	213	-1	64	54	59	-0.21	0.53	60	67	64	0.13	0.71	65	49	57	-0.26	0.28	AMD1_1825	52.3333	113	157	339
AMD1_1826	HTH-type transcriptional repressor KstR	1730912	1731604	693	-1	248	222	235	-0.14	0.53	231	231	231	-0.0025	0.99	224	203	214	-0.11	0.61	AMD1_1826	216.333	111	649	333
AMD1_1827	Gluconate 5-dehydrogenase	1731738	1732487	750	3	63	47	55	-0.34	0.33	59	60	59	0.0056	0.99	58	43	50	-0.25	0.32	AMD1_1827	46.3333	11	139	33
AMD1_1828	(R)-benzylsuccinyl-CoA dehydrogenase	1732495	1733706	1212	1	216	148	182	-0.51	0.00395	202	176	189	-0.18	0.43	171	135	153	-0.27	0.16	AMD1_1828	144.667	13	434	39
AMD1_1829	Aminoglycoside phosphotransferase	1733714	1734775	1062	2	196	146	171	-0.39	0.0425	183	153	168	-0.24	0.23	148	133	141	-0.11	0.6	AMD1_1829	143	22.3333	429	67
AMD1_1830	putative branched-chain-amino-acid aminotransferase	1734903	1735826	924	-3	99	119	109	0.23	0.41	93	68	80	-0.38	0.16	66	108	87	0.6	0.00929	AMD1_1830	116.333	23.6667	349	71
AMD1_1831	Hydroxymethylpyrimidine ABC transporter, substrate-binding component	1736024	1737052	1029	-1	198	304	251	0.58	0.00213	185	138	161	-0.39	0.0792	134	277	205	1.01	3.53e-08	AMD1_1831	296.667	33.6667	890	101
AMD1_1832	protein of unknown function	1737284	1737457	174	-1	21	36	28	0.57	0.17	19	25	22	0.26	0.5	24	33	28	0.19	0.46	AMD1_1832	35.3333	2.66667	106	8
AMD1_1833	Low specificity L-threonine aldolase	1737661	1738725	1065	-2	403	407	405	0.0126	0.97	376	303	340	-0.3	0.0931	294	371	333	0.29	0.0991	AMD1_1833	398	26	1194	78
AMD1_1834	HTH-type transcriptional regulator McbR	1738827	1739543	717	-3	496	520	508	0.064	0.75	463	335	399	-0.45	0.0052	324	475	400	0.51	0.000581	AMD1_1834	507.333	85.6667	1522	257
AMD1_1835	L-carnitine dehydrogenase	1739804	1740751	948	2	54	54		-0.00164	1	51	53	52	0.046	0.9	51	50	50	-0.0258	0.93	AMD1_1835	52.6667	11.3333	158	34
AMD1_1836	3-keto-5-aminohexanoate cleavage enzyme	1740757	1741689	933	1	82	89	85	0.11	0.73	76	68	72	-0.14	0.65	66	81	74	0.21	0.37	AMD1_1836	86.6667	36.3333	260	109
AMD1_1837	4-carboxymuconolactone decarboxylase	1741840	1742226	387	1	46	38	42	-0.2	0.61	43	33	38	-0.29	0.38	32	35	34	0.0524	0.85	AMD1_1837	37.3333	1	112	3
AMD1_1838	3-oxoacyl-[acyl-carrier-protein] reductase FabG	1742274	1743050	777	3	107	105	106	-0.022	0.95	100	90	95	-0.15	0.61	87	96	92	0.11	0.65	AMD1_1838	103	8.66667	309	26
AMD1_1839	Pterin deaminase	1743198	1744652	1455	-3	124	126	125	0.0191	0.96	116	157	137	0.4	0.0616	153	115	134	-0.32	0.12	AMD1_1839	123.333	41.6667	370	125
AMD1_1840	Acetoacetyl-coenzyme A synthetase	1744806	1746764	1959	3	-	-			-	9.22	11	10	0.18	0.7	11	9.96	11	-0.0491	0.85	AMD1_1840	10.6667	2	32	6
AMD1_1841	Quinone oxidoreductase 1	1746761	1747786	1026	2	99	100		0.00171	1	93	106	99	0.17	0.53	103	91	97	-0.13	0.58	AMD1_1841	97	20.6667	291	62
AMD1_1842	Long-chain-fatty-acid--CoA ligase	1747844	1749460	1617	2	134	144	139	0.0873	0.78	125	112	119	-0.14	0.63	109	131	120	0.21	0.34	AMD1_1842	140.667	59.3333	422	178
AMD1_1843	2-dehydro-3-deoxy-D-gluconate 5-dehydrogenase	1749645	1750340	696	3	122	100	111	-0.26	0.3	114	87	101	-0.35	0.13	85	91	88	0.0778	0.75	AMD1_1843	97.3333	35.3333	292	106
AMD1_1844	Hydroxymethylpyrimidine ABC transporter, substrate-binding component	1750599	1751627	1029	-3	90	88	89	-0.0257	0.94	84	82	83	-0.0347	0.92	80	80	80	0.0151	0.96	AMD1_1844	85.6667	101.667	257	305
AMD1_1845	Cyn operon transcriptional activator	1752173	1753171	999	-1	40	43	42	0.1	0.79	37	31	34	-0.21	0.57	30	40	35	0.23	0.36	AMD1_1845	42.3333	21	127	63
AMD1_1846	protein of unknown function	1753448	1753681	234	2	65	94	80	0.47	0.0469	61	69	65	0.14	0.69	66	86	76	0.24	0.32	AMD1_1846	91.6667	5.66667	275	17
AMD1_1847	Creatinine amidohydrolase	1753618	1754418	801	1	146	212	179	0.5	0.0138	136	167	152	0.26	0.33	162	193	178	0.19	0.4	AMD1_1847	207	16	621	48
AMD1_1848	Putative ATP-binding protein BruAb2_1123	1754391	1755230	840	3	134	182	158	0.4	0.1	125	151	138	0.25	0.34	147	167	157	0.12	0.61	AMD1_1848	179	69.3333	537	208
AMD1_1849	Aliphatic sulfonates transport permease protein SsuC	1755208	1756056	849	1	86	129	108	0.52	0.0288	81	112	96	0.42	0.11	108	118	113	0.0801	0.75	AMD1_1849	126.333	59.6667	379	179
AMD1_1850	Putative FAD-linked oxidoreductase	1756072	1757430	1359	1	337	345	341	0.0317	0.9	315	314		-6.7e-05	1	305	315	310	0.0364	0.87	AMD1_1850	337.333	19.6667	1012	59
AMD1_1851	Hydroxymethylpyrimidine ABC transporter, substrate-binding component	1757470	1758504	1035	1	503	536	519	0.0843	0.75	470	397	434	-0.22	0.33	385	489	437	0.28	0.13	AMD1_1851	523.667	69.6667	1571	209
AMD1_1852	Vanillate O-demethylase oxidoreductase	1758542	1759504	963	2	622	647	634	0.0557	0.78	581	542	561	-0.0964	0.6	525	591	558	0.15	0.34	AMD1_1852	631.667	44	1895	132
AMD1_1853	Rut operon repressor	1759508	1760167	660	2	759	809	784	0.089	0.6	709	688	698	-0.0402	0.84	667	739	703	0.13	0.4	AMD1_1853	788	76	2364	228
AMD1_1854	4-carboxymuconolactone decarboxylase	1760228	1760611	384	2	262	215	239	-0.26	0.25	245	253	249	0.0464	0.85	245	197	221	-0.26	0.16	AMD1_1854	209.333	7	628	21
AMD1_1855	RutC family protein YjgH	1760718	1761137	420	3	134	114	124	-0.2	0.45	125	154	140	0.28	0.23	149	104	127	-0.42	0.0483	AMD1_1855	111.333	43	334	129
AMD1_1856	D-3-phosphoglycerate dehydrogenase	1761159	1762121	963	3	355	339	347	-0.061	0.8	332	381	356	0.19	0.33	369	310	340	-0.21	0.24	AMD1_1856	330.333	147.333	991	442
AMD1_1857	Inositol 2-dehydrogenase	1762182	1763312	1131	-3	51	45	48	-0.13	0.75	47	41	44	-0.18	0.62	39	41	40	0.0334	0.91	AMD1_1857	44	90.6667	132	272
AMD1_1858	Glucose--fructose oxidoreductase	1763309	1764385	1077	-1	182	165	173	-0.13	0.58	170	110	140	-0.6	0.00657	106	151	128	0.43	0.0353	AMD1_1858	160.667	36.3333	482	109
AMD1_1859	3-methyl-2-oxobutanoate hydroxymethyltransferase	1764426	1765241	816	-3	135	108	122	-0.29	0.24	126	78	102	-0.63	0.0167	76	99	87	0.29	0.21	AMD1_1859	105.667	7.33333	317	22
AMD1_1860	Naphthalene 1,2-dioxygenase/salicylate 5-hydroxylase systems, ferredoxin component	1765274	1765591	318	-1	-	-			-	9.15	7.4	8.28	-0.13	0.79						AMD1_1860	7.66667	8.66667	23	26
AMD1_1861	Fatty acid desaturase	1765609	1766733	1125	-2	27	16	22	-0.53	0.19	25	16	21	-0.48	0.21	16	15	15	-0.0305	0.91	AMD1_1861	16	61.6667	48	185
AMD1_1862	Degradation activator	1766912	1767928	1017	2	782	831	806	0.0848	0.64	730	769	750	0.0713	0.71	746	759	753	0.0229	0.91	AMD1_1862	809.333	11.6667	2428	35
AMD1_1863	conserved protein of unknown function	1767976	1769043	1068	1	271	266	268	-0.0231	0.94	253	218	235	-0.2	0.45	211	243	227	0.15	0.49	AMD1_1863	258.667	9.33333	776	28
AMD1_1864	protein of unknown function	1769088	1769309	222	3	23	23	23	0.0179	0.97	21	14	18	-0.38	0.38	14	21	17	0.25	0.32	AMD1_1864	22.3333	2.33333	67	7
AMD1_1865	D-allose transporter subunit	1769400	1770347	948	3	224	236	230	0.0631	0.86	210	87	149	-1.19	5.71e-06	85	216	150	1.29	1.73e-08	AMD1_1865	231.333	16.3333	694	49
AMD1_1866	Ribose transport system permease protein RbsC	1770526	1771512	987	1	44	50	47	0.15	0.69	41	30	35	-0.36	0.31	29	45	37	0.42	0.13	AMD1_1866	48.6667	15.6667	146	47
AMD1_1867	Fructose import ATP-binding protein FrcA	1771516	1772292	777	1	83	78	81	-0.0694	0.84	78	43	60	-0.76	0.0129	42	71	57	0.61	0.0244	AMD1_1867	76.3333	31.3333	229	94
AMD1_1868	2-hydroxyacid dehydrogenase YoaD	1772320	1773351	1032	1	84	71	77	-0.21	0.46	78	59	68	-0.36	0.22	57	65	61	0.12	0.65	AMD1_1868	69	14	207	42
AMD1_1869	conserved protein of unknown function	1773594	1774019	426	3	226	179	203	-0.31	0.12	211	154	183	-0.42	0.047	149	164	157	0.1	0.64	AMD1_1869	175	5	525	15
AMD1_1870	conserved protein of unknown function	1774073	1775122	1050	2	376	297	336	-0.32	0.067	351	253	302	-0.45	0.00777	245	271	258	0.12	0.54	AMD1_1870	289	14.6667	867	44
AMD1_1871	Putative glycosyltransferase EpsJ	1775119	1775871	753	1	277	220	249	-0.31	0.0631	259	164	212	-0.62	0.000545	159	201	180	0.28	0.13	AMD1_1871	214.667	17.6667	644	53
AMD1_1872	Chondroitin polymerase	1775872	1776549	678	1	199	154	176	-0.33	0.12	186	121	153	-0.56	0.00916	118	140	129	0.2	0.33	AMD1_1872	150	4.66667	450	14
AMD1_1873	conserved protein of unknown function	1776549	1778030	1482	3	276	202	239	-0.42	0.0139	257	188	223	-0.41	0.0969	183	185	184	0.0163	0.96	AMD1_1873	197.333	27	592	81
AMD1_1874	Tetracycline resistance protein, class C	1778047	1779291	1245	-2	129	158	144	0.27	0.19	121	159	140	0.36	0.0993	154	145	149	-0.0647	0.78	AMD1_1874	154.333	30.3333	463	91
AMD1_1875	3-succinoylsemialdehyde-pyridine dehydrogenase	1779540	1780988	1449	3	857	818	837	-0.0638	0.72	800	970	885	0.27	0.0791	940	747	844	-0.3	0.0336	AMD1_1875	797	32	2391	96
AMD1_1876	Hydroxyacylglutathione hydrolase	1781188	1781913	726	-2	355	333	344	-0.081	0.75	331	252	292	-0.37	0.0725	244	305	274	0.27	0.14	AMD1_1876	325.667	56.3333	977	169
AMD1_1877	Pyrophosphate--fructose 6-phosphate 1-phosphotransferase	1781910	1783076	1167	-3	1722	1509	1616	-0.18	0.18	1608	1184	1396	-0.43	0.000872	1148	1378	1263	0.24	0.0813	AMD1_1877	1473.67	15.6667	4421	47
AMD1_1878	Putative L,D-transpeptidase YcfS	1783172	1783918	747	-1	1069	957	1013	-0.15	0.27	998	571	785	-0.79	3.02e-09	554	874	714	0.63	2.06e-06	AMD1_1878	933.667	43	2801	129
AMD1_1879	Homoserine/homoserine lactone efflux protein	1784095	1784718	624	1	328	311	320	-0.0709	0.78	307	176	241	-0.75	0.000383	171	284	227	0.65	0.00164	AMD1_1879	303.333	11.3333	910	34
AMD1_1880	conserved protein of unknown function	1784730	1786052	1323	3	357	363	360	0.0216	0.94	334	215	275	-0.6	0.00345	209	332	270	0.59	0.00212	AMD1_1880	354.333	50	1063	150
AMD1_1881	conserved protein of unknown function	1786071	1786442	372	-3	370	404	387	0.12	0.6	345	268	307	-0.34	0.0887	260	369	315	0.46	0.00572	AMD1_1881	394	68.6667	1182	206
AMD1_1882	xylulokinase	1786773	1788224	1452	3	267	80	173	-1.71	6.71e-20	249	72	160	-1.76	7.01e-19	70	73	71	0.0444	0.87	AMD1_1882	78	17.6667	234	53
AMD1_1883	SnoaL-like domain protein	1788239	1788598	360	-1	-	-			-	8.42	10	9.35	0.15	0.76	9.96	14	12	0.14	0.54	AMD1_1883	14.6667	34.6667	44	104
AMD1_1884	xylose isomerase	1788750	1790060	1311	3	198	170	184	-0.2	0.4	185	140	163	-0.36	0.11	136	155	145	0.13	0.57	AMD1_1884	166.333	33.3333	499	100
AMD1_1885	conserved protein of unknown function	1790100	1790390	291	3	1275	294	784	-2.09	6.54e-28	1190	1890	1540	0.63	0.000897	1832	268	1050	-2.75	3.93e-46	AMD1_1885	286	7	858	21
AMD1_1886	Putative hydrolase YutF	1790416	1791207	792	1	606	287	447	-1.06	2.25e-15	566	607	586	0.0909	0.7	588	262	425	-1.12	2.63e-10	AMD1_1886	279.333	6.66667	838	20
AMD1_1887	Carnitine catabolism transcriptional activator	1791389	1792369	981	-1	51	48	50	-0.0661	0.86	48	46	47	-0.0499	0.9	45	44	44	-0.00543	0.99	AMD1_1887	47	32	141	96
AMD1_1888	3-keto-5-aminohexanoate cleavage enzyme	1792447	1793364	918	1	55	43	49	-0.3	0.36	51	42	47	-0.24	0.48	41	39	40	-0.0346	0.91	AMD1_1888	41.6667	8.66667	125	26
AMD1_1889	L-carnitine dehydrogenase	1793397	1794476	1080	3	67	59	63	-0.15	0.66	62	52	57	-0.24	0.46	50	54	52	0.0648	0.81	AMD1_1889	57.6667	30.6667	173	92
AMD1_1890	Butyryl-CoA dehydrogenase	1794481	1795644	1164	1	73	74	73	0.013	0.98	68	54	61	-0.31	0.29	52	68	60	0.27	0.25	AMD1_1890	72.3333	17	217	51
AMD1_1891	Cyanophycin synthetase	1795717	1797975	2259	1	247	217	232	-0.18	0.37	231	164	197	-0.47	0.0124	159	198	179	0.26	0.15	AMD1_1891	211	32.3333	633	97
AMD1_1892	crotonobetainyl-CoA hydratase	1798085	1798867	783	2	134	125	130	-0.0946	0.75	125	93	109	-0.39	0.1	90	114	102	0.26	0.24	AMD1_1892	122	10	366	30
AMD1_1893	Carboxylesterase NlhH	1799082	1800023	942	3	177	184	180	0.0572	0.82	165	114	139	-0.5	0.0314	110	168	139	0.52	0.0142	AMD1_1893	180	70	540	210
AMD1_1894	Glutathione import ATP-binding protein GsiA	1800293	1801951	1659	-1	509	468	488	-0.11	0.63	475	277	376	-0.75	5.57e-05	268	427	348	0.63	6.46e-05	AMD1_1894	456.333	90	1369	270
AMD1_1895	Glutathione transport system permease protein GsiD	1801944	1802774	831	-3	81	108	95	0.37	0.11	76	30	53	-1.24	4.7e-05	29	99	64	1.67	1.34e-08	AMD1_1895	105.667	40	317	120
AMD1_1896	Glutathione transport system permease protein GsiC	1802785	1803744	960	-2	149	167	158	0.15	0.55	139	48	93	-1.48	3.68e-08	46	153	100	1.66	4.65e-10	AMD1_1896	163.333	28.3333	490	85
AMD1_1897	Hemin-binding lipoprotein	1803761	1805344	1584	-1	789	881	835	0.15	0.48	737	351	544	-1.04	2.27e-08	340	805	573	1.2	2.87e-11	AMD1_1897	861.667	34.6667	2585	104
AMD1_1898	Cocaine esterase	1805487	1807493	2007	-3	782	778	780	-0.00866	0.97	731	680	705	-0.1	0.56	659	710	685	0.0943	0.57	AMD1_1898	759.333	32.3333	2278	97
AMD1_1899	StbD replicon stabilization protein (antitoxin to StbE)	1807641	1807889	249	3	282	276	279	-0.0319	0.9	264	253	258	-0.0503	0.87	246	252	249	0.0235	0.93	AMD1_1899	268.333	2	805	6
AMD1_1900	Qin prophage; mRNA interferase toxin RelE	1807879	1808160	282	1	184	175	180	-0.0606	0.82	172	154	163	-0.14	0.57	149	160	155	0.0762	0.74	AMD1_1900	171	24.3333	513	73
AMD1_1901	Deoxycytidylate deaminase	1808168	1808761	594	-1	269	263	266	-0.0272	0.91	251	153	202	-0.67	0.000276	149	240	194	0.63	0.000607	AMD1_1901	257	49.3333	771	148
AMD1_1902	Ureidoglycolate lyase	1808766	1809278	513	-3	170	194	182	0.17	0.49	159	116	137	-0.41	0.0657	112	177	145	0.58	0.0027	AMD1_1902	189.667	41.3333	569	124
AMD1_1903	Putative allantoin catabolism protein	1809288	1810133	846	-3	312	310	311	-0.00895	0.98	292	179	235	-0.67	0.00026	174	283	228	0.65	0.000261	AMD1_1903	302.333	16.3333	907	49
AMD1_1904	Chitooligosaccharide deacetylase	1810139	1811572	1434	-1	410	418	414	0.0249	0.92	383	234	308	-0.68	0.000115	227	381	304	0.7	9.18e-05	AMD1_1904	408.333	42.3333	1225	127
AMD1_1905	5-hydroxyisourate hydrolase	1811751	1812116	366	3	232	217	225	-0.0902	0.7	217	145	181	-0.55	0.00411	141	198	170	0.43	0.0239	AMD1_1905	212	16.6667	636	50
AMD1_1906	Xanthine dehydrogenase, iron-sulfur cluster and FAD-binding subunit A	1812120	1813601	1482	3	543	596	570	0.13	0.47	507	453	480	-0.15	0.42	440	545	492	0.27	0.1	AMD1_1906	582.333	35.6667	1747	107
AMD1_1907	Xanthine dehydrogenase, molybdenum binding subunit	1813603	1815963	2361	1	803	881	842	0.13	0.41	750	640	695	-0.22	0.2	621	805	713	0.34	0.0191	AMD1_1907	859	56	2577	168
AMD1_1908	XdhC protein (assists in molybdopterin insertion into xanthine dehydrogenase)	1815960	1816910	951	3	326	380	353	0.21	0.23	304	268	286	-0.17	0.39	260	347	304	0.37	0.0299	AMD1_1908	370	60.6667	1110	182
AMD1_1909	stationary phase nucleoid protein that sequesters iron and protects DNA from damage	1816935	1817423	489	-3	71	54	63	-0.31	0.31	66	57	61	-0.18	0.57	55	50	52	-0.0931	0.73	AMD1_1909	53.3333	54	160	162
AMD1_1910	Putative HTH-type transcriptional regulator YybR	1817533	1818048	516	-2	158	160	159	0.0159	0.96	148	143	145	-0.0502	0.86	138	146	142	0.0646	0.78	AMD1_1910	156	4.66667	468	14
AMD1_1911	conserved protein of unknown function	1818163	1818639	477	1	95	80	88	-0.22	0.42	89	73	81	-0.24	0.37	71	73	72	0.0279	0.92	AMD1_1911	78	4.33333	234	13
AMD1_1912	Beta-lactamase class C and other penicillin binding proteins	1818813	1820009	1197	3	118	114	116	-0.0477	0.87	110	99	104	-0.14	0.59	96	104	100	0.0834	0.73	AMD1_1912	111	111.667	333	335
AMD1_1913	Transcriptional regulator	1820020	1820940	921	-2	556	619	587	0.15	0.41	519	490	505	-0.079	0.75	475	565	520	0.21	0.23	AMD1_1913	604	44.3333	1812	133
AMD1_1914	Putative membrane protein	1821089	1822309	1221	2	549	619	584	0.16	0.36	512	375	444	-0.43	0.00948	364	565	465	0.59	0.000153	AMD1_1914	605	87	1815	261
AMD1_1915	Guanine deaminase	1822479	1823798	1320	3	265	277	271	0.0586	0.8	248	204	226	-0.25	0.22	198	253	225	0.29	0.1	AMD1_1915	269.333	53.6667	808	161
AMD1_1916	conserved protein of unknown function	1823856	1824362	507	3	993	893	943	-0.15	0.29	927	784	856	-0.23	0.14	760	815	788	0.0886	0.6	AMD1_1916	870.333	34.6667	2611	104
AMD1_1917	Putative hydroxypyruvate reductase	1824381	1825646	1266	3	994	987	991	-0.0105	0.96	929	717	823	-0.36	0.0143	696	901	798	0.34	0.0135	AMD1_1917	963	23	2889	69
AMD1_1918	putative Domain often clustered or fused with uracil-DNA glycosylase / Uracil-DNA glycosylase, family 6	1825648	1827108	1461	-2	58	59	59	0.0288	0.94	54	79	66	0.47	0.0836	76	54	65	-0.35	0.13	AMD1_1918	58	266	174	798
AMD1_1919	Putative DNA modification/repair radical SAM protein	1827108	1828343	1236	-3	87	111	99	0.31	0.21	81	137	109	0.7	0.00117	133	101	117	-0.32	0.12	AMD1_1919	107.667	34.3333	323	103
AMD1_1920	Gamma-glutamylputrescine synthetase PuuA	1828463	1829851	1389	-1	900	1092	996	0.27	0.0974	840	822	831	-0.0299	0.89	797	997	897	0.29	0.04	AMD1_1920	1066	71	3198	213
AMD1_1921	Glutamate-1-semialdehyde 2,1-aminomutase 2	1829882	1831264	1383	-1	277	290	283	0.0617	0.8	258	239	249	-0.11	0.65	232	265	248	0.16	0.42	AMD1_1921	282.667	44.6667	848	134
AMD1_1922	conserved exported protein of unknown function	1831420	1831872	453	1	112	108	110	-0.0518	0.86	105	70	87	-0.54	0.0234	68	99	83	0.44	0.0443	AMD1_1922	105.333	17.3333	316	52
AMD1_1923	Nicotinate degradation protein R	1831896	1832354	459	-3	154	120	137	-0.33	0.11	144	120	132	-0.24	0.34	117	110	113	-0.0609	0.81	AMD1_1923	117.333	14	352	42
AMD1_1924	conserved membrane protein of unknown function	1832401	1832853	453	1	65	70	67	0.0939	0.79	60	65	63	0.0988	0.79	63	64	64	0.00393	0.99	AMD1_1924	68.6667	150.333	206	451
AMD1_1925	ANAPC4_WD40 domain-containing protein	1832915	1833889	975	-1	905	926	916	0.0318	0.87	846	1035	940	0.28	0.0812	1004	846	925	-0.22	0.16	AMD1_1925	902.667	28	2708	84
AMD1_1926	Metal chaperone YciC	1834050	1835144	1095	-3	1064	1128	1096	0.0787	0.73	993	1074	1034	0.11	0.64	1041	1030	1036	-0.0133	0.96	AMD1_1926	1104.67	68.6667	3314	206
AMD1_1927	Catechol 1,2-dioxygenase	1835327	1836061	735	2	283	165	224	-0.74	6.11e-05	265	224	244	-0.22	0.39	217	151	184	-0.45	0.0252	AMD1_1927	161	12.3333	483	37
AMD1_1928	Salmolysin	1836259	1836771	513	1	426	367	397	-0.2	0.26	398	314	356	-0.32	0.0656	304	335	320	0.12	0.51	AMD1_1928	358.333	8.33333	1075	25
AMD1_1929	Carboxylate/amino acid/amine transporter	1836866	1837804	939	2	260	303	281	0.21	0.24	242	376	309	0.6	0.000472	365	277	321	-0.35	0.0353	AMD1_1929	295.333	20	886	60
AMD1_1930	HTH-type transcriptional repressor CytR	1837869	1838903	1035	3	752	892	822	0.24	0.0799	702	748	725	0.0869	0.64	726	815	770	0.15	0.35	AMD1_1930	868.667	178	2606	534
AMD1_1931	Gamma-glutamyl-gamma-aminobutyrate hydrolase PuuD	1838939	1839712	774	-1	1418	1625	1521	0.19	0.25	1324	1166	1245	-0.17	0.34	1131	1484	1308	0.35	0.0168	AMD1_1931	1584	105	4752	315
AMD1_1932	Alpha-keto acid-binding periplasmic protein TakP	1840011	1841123	1113	3	5476	5442	5459	-0.0083	0.98	5116	3196	4156	-0.64	0.00128	3099	4972	4036	0.64	1.03e-05	AMD1_1932	5295.67	247	15887	741
AMD1_1933	Neu5Ac permease	1841241	1842989	1749	-3	1159	1121	1140	-0.0447	0.86	1083	673	878	-0.66	0.000212	652	1023	838	0.61	1.78e-05	AMD1_1933	1093.67	199.333	3281	598
AMD1_1934	TRAP-type mannitol/chloroaromatic compound transport system, small permease component	1842986	1843570	585	-1	1357	940	1148	-0.51	0.000947	1267	774	1021	-0.68	9.23e-05	751	859	805	0.17	0.3	AMD1_1934	916.333	29.6667	2749	89
AMD1_1935	LIV-I protein H	1843777	1844682	906	-2	400	450	425	0.16	0.41	374	518	446	0.44	0.0266	502	411	456	-0.24	0.2	AMD1_1935	439	15.3333	1317	46
AMD1_1936	zf-CGNR domain-containing protein	1844776	1845375	600	1	609	687	648	0.17	0.25	568	767	668	0.41	0.0182	744	628	686	-0.21	0.23	AMD1_1936	670	10.6667	2010	32
AMD1_1937	conserved exported protein of unknown function	1845368	1845901	534	2	347	378	363	0.12	0.55	324	430	377	0.38	0.0401	417	345	381	-0.22	0.22	AMD1_1937	368.667	16.3333	1106	49
AMD1_1938	Indolepyruvate ferredoxin oxidoreductase, alpha and beta subunits	1846110	1849586	3477	3	2237	2475	2356	0.14	0.31	2089	2306	2198	0.14	0.42	2237	2261	2249	0.0133	0.95	AMD1_1938	2409.33	49.6667	7228	149
AMD1_1939	diguanylate cyclase/phosphodiesterase (GGDEF & EAL domains) with PAS/PAC sensor(s)	1849726	1852035	2310	1	2894	2836	2865	-0.0281	0.87	2703	1955	2329	-0.45	0.00947	1896	2591	2244	0.4	0.0113	AMD1_1939	2763	252	8289	756
AMD1_1940	conserved protein of unknown function	1852190	1852969	780	2	1259	1178	1219	-0.0922	0.57	1176	850	1013	-0.45	0.000892	824	1076	950	0.36	0.00563	AMD1_1940	1148	103	3444	309
AMD1_1941	Peripla_BP_6 domain-containing protein	1853017	1854327	1311	1	497	460	479	-0.11	0.58	464	332	398	-0.46	0.00825	322	421	371	0.33	0.0543	AMD1_1941	448.333	30.6667	1345	92
AMD1_1942	Cytochrome c oxidase, subunit IV	1854553	1854801	249	1	4642	5314	4978	0.19	0.26	4335	6536	5436	0.56	0.00214	6341	4853	5597	-0.34	0.0399	AMD1_1942	5182.67	40	15548	120
AMD1_1943	protein of unknown function	1854850	1854963	114	-2	28	31	29	0.12	0.79	26	35	31	0.35	0.36	34	28	31	-0.13	0.64	AMD1_1943	30.6667	1831.67	92	5495
AMD1_1944	NAD(P) transhydrogenase subunit alpha part 1	1855093	1856394	1302	1	825	690	758	-0.25	0.12	771	903	837	0.22	0.24	876	630	753	-0.43	0.00929	AMD1_1944	674.667	6	2024	18
AMD1_1946	pyridine nucleotide transhydrogenase subunit beta	1856818	1858215	1398	1	1320	1383	1351	0.0637	0.76	1233	1539	1386	0.31	0.0264	1492	1263	1377	-0.21	0.16	AMD1_1946	1352	19.3333	4056	58
AMD1_1947	Leucine efflux protein	1858338	1858970	633	-3	48	53	51	0.11	0.78	45	87	66	0.8	0.0157	84	49	66	-0.54	0.0605	AMD1_1947	52.3333	28.3333	157	85
AMD1_1948	conserved exported protein of unknown function	1859125	1859601	477	-2	192	86	139	-1.1	1.32e-05	179	99	139	-0.8	0.000981	96	78	87	-0.2	0.39	AMD1_1948	84	3.33333	252	10
AMD1_1949	protein of unknown function	1859545	1859754	210	1																AMD1_1949	3	13.6667	9	41
AMD1_1950	conserved membrane protein of unknown function	1859862	1860356	495	3	209	160	185	-0.36	0.046	195	208	201	0.0791	0.76	201	146	174	-0.39	0.043	AMD1_1950	156.333	50	469	150
AMD1_1951	Glutathione-regulated potassium-efflux system ancillary protein KefF	1860485	1861078	594	-1	294	246	270	-0.24	0.28	275	280	278	0.0278	0.91	272	224	248	-0.23	0.23	AMD1_1951	238.333	14.3333	715	43
AMD1_1952	TPR repeat-containing protein YrrB	1861110	1861958	849	-3	1088	1003	1046	-0.11	0.48	1016	877	947	-0.2	0.29	851	917	884	0.0883	0.65	AMD1_1952	976.667	113.667	2930	341
AMD1_1953	30S ribosomal protein S21	1862092	1862355	264	-2	6770	8741	7756	0.35	0.00952	6323	7680	7001	0.27	0.0971	7450	7985	7717	0.0879	0.6	AMD1_1953	8524	68.6667	25572	206
AMD1_1954	Endo-beta-mannanase	1862594	1863781	1188	2	329	153	241	-1.06	2.49e-08	307	547	427	0.79	0.000147	530	140	335	-1.88	4.11e-18	AMD1_1954	149.667	40.6667	449	122
AMD1_1955	fosmidomycin efflux pump	1863959	1865173	1215	2	117	120	119	0.0333	0.91	110	395	252	1.82	1.89e-23	383	110	246	-1.76	9.43e-22	AMD1_1955	117.333	59.3333	352	178
AMD1_1956	2,5-dichloro-2,5-cyclohexadiene-1,4-diol dehydrogenase	1865186	1865944	759	-1	23	23	23	-0.00649	0.99	21	24	23	0.13	0.76	24	21	22	-0.0759	0.78	AMD1_1956	22.3333	38	67	114
AMD1_1957	Sarcosine oxidase subunit beta	1866145	1867398	1254	1	651	624	638	-0.0578	0.75	608	576	592	-0.0709	0.74	559	570	564	0.0222	0.92	AMD1_1957	608.667	37.3333	1826	112
AMD1_1958	Cupin_2 domain-containing protein	1867413	1867769	357	3	206	196	201	-0.0691	0.78	192	165	179	-0.2	0.33	160	179	169	0.12	0.54	AMD1_1958	190.333	11	571	33
AMD1_1959	conserved exported protein of unknown function	1867850	1868284	435	2	171	184	178	0.0957	0.72	160	162	161	0.0214	0.94	157	168	163	0.0755	0.73	AMD1_1959	179.667	18.3333	539	55
AMD1_1960	Sarcosine oxidase delta subunit	1868296	1868676	381	1	161	154	157	-0.0606	0.84	151	135	143	-0.14	0.63	131	140	136	0.0673	0.79	AMD1_1960	150.333	6.66667	451	20
AMD1_1961	Sarcosine oxidase subunit alpha	1868676	1871669	2994	3	870	850	860	-0.0328	0.87	813	754	784	-0.1	0.64	731	776	754	0.0743	0.71	AMD1_1961	828.667	39.6667	2486	119
AMD1_1962	Sarcosine oxidase gamma subunit	1871662	1872210	549	1	151	159	155	0.073	0.78	141	132	136	-0.0831	0.76	128	145	136	0.14	0.51	AMD1_1962	155.333	8.33333	466	25
AMD1_1963	conserved exported protein of unknown function	1872751	1873002	252	-2	2880	1796	2338	-0.13	0.72	2683	4297	3490	0.13	0.71	4176	1643	2910	-0.11	0.39	AMD1_1963	1743	37	5229	111
AMD1_1964	HTH-type transcriptional repressor FabR	1873146	1873790	645	-3	1167	1291	1229	0.14	0.35	1090	929	1009	-0.22	0.12	901	1179	1040	0.36	0.00617	AMD1_1964	1257.33	86.6667	3772	260
AMD1_1965	Nodulation protein N	1873923	1874408	486	-3	559	489	524	-0.18	0.31	522	434	478	-0.25	0.12	421	447	434	0.0687	0.73	AMD1_1965	476.333	11.3333	1429	34
AMD1_1966	RND multidrug efflux transporter; Acriflavin resistance protein	1874539	1877667	3129	-2	1232	690	961	-0.82	3.56e-11	1150	1173	1162	0.0277	0.89	1138	631	884	-0.82	7.17e-10	AMD1_1966	673	112.667	2019	338
AMD1_1967	putative Co/Zn/Cd efflux system membrane fusion protein	1877682	1878836	1155	-3	480	277	378	-0.76	7.77e-06	448	463	456	0.0453	0.84	449	253	351	-0.78	1.05e-05	AMD1_1967	270	6.33333	810	19
AMD1_1968	DNA-binding transcriptional regulator HexR	1879059	1879886	828	-3	58	53	56	-0.0992	0.8	54	51	53	-0.0606	0.88	50	49	49	-0.0233	0.94	AMD1_1968	52	22.3333	156	67
AMD1_1969	protein of unknown function	1879840	1880028	189	1	22	16	19	-0.32	0.44	21	11	16	-0.68	0.11	11	14	12	0.14	0.56	AMD1_1969	15.3333	23.3333	46	70
AMD1_1970	N-formylglutamate deformylase	1880056	1880877	822	1	417	291	354	-0.49	0.00251	390	228	309	-0.71	0.00487	221	266	243	0.19	0.41	AMD1_1970	284	21.3333	852	64
AMD1_1971	cell processes; transport of small molecules; amino acids, amines, peptides	1880897	1882456	1560	2	469	265	367	-0.78	1.13e-05	438	134	286	-1.68	2.9e-17	130	242	186	0.85	3.56e-06	AMD1_1971	259	50.3333	777	151
AMD1_1972	glutamine synthetase family protein	1882561	1883931	1371	1	260	164	212	-0.62	0.00103	242	86	164	-1.43	4.4e-11	84	149	117	0.72	0.00216	AMD1_1972	160.333	51.6667	481	155
AMD1_1973	Succinate-semialdehyde dehydrogenase [NADP(+)] 1	1884001	1885389	1389	1	489	464	477	-0.0655	0.81	456	343	400	-0.39	0.045	333	424	378	0.28	0.15	AMD1_1973	455.333	23.3333	1366	70
AMD1_1974	Alcohol dehydrogenase	1885428	1886600	1173	3	362	405	383	0.15	0.56	338	251	294	-0.39	0.11	243	370	306	0.51	0.0165	AMD1_1974	396.333	57.6667	1189	173
AMD1_1975	2-aminoethylphosphonate ABC transporter substrate-binding protein	1886839	1887945	1107	1	1635	1694	1665	0.0463	0.87	1528	1071	1299	-0.47	0.0281	1038	1547	1293	0.5	0.00917	AMD1_1975	1659.67	28	4979	84
AMD1_1976	Sulfate transport system permease protein CysW	1888010	1888927	918	2	319	358	339	0.16	0.49	298	218	258	-0.42	0.0223	211	327	269	0.58	0.000815	AMD1_1976	350.667	44	1052	132
AMD1_1977	Thiamin ABC transporter, transmembrane component	1888924	1889715	792	1	277	294	286	0.0832	0.72	259	176	217	-0.52	0.00445	171	269	220	0.59	0.00124	AMD1_1977	287.667	22	863	66
AMD1_1978	CP4-6 prophage; ABC transporter ATP-binding protein AfuC	1889735	1890799	1065	2	666	646	656	-0.039	0.86	622	370	496	-0.72	8.36e-06	359	590	475	0.68	1.92e-06	AMD1_1978	630.667	15.3333	1892	46
AMD1_1979	protein of unknown function	1890678	1891028	351	3	411	395	403	-0.0529	0.83	384	268	326	-0.49	0.016	260	360	310	0.42	0.0159	AMD1_1979	384.333	6.66667	1153	20
AMD1_1980	protein of unknown function	1891003	1891212	210	1	2733	1902	2318	-0.49	0.0108	2551	2317	2434	-0.13	0.58	2247	1737	1992	-0.34	0.0217	AMD1_1980	1853	13	5559	39
AMD1_1981	Morphology and auto-aggregation control protein	1891776	1892687	912	3	134	122	128	-0.12	0.65	125	73	99	-0.73	0.0029	70	112	91	0.56	0.016	AMD1_1981	119	4.66667	357	14
AMD1_1982	putative ABC transporter periplasmic binding protein/polyhydroxybutyrate synthase	1892916	1894070	1155	3	248	181	215	-0.42	0.0667	232	76	154	-1.56	9.26e-10	74	165	120	1.09	4.79e-06	AMD1_1982	177	40.6667	531	122
AMD1_1983	putative ABC transporter ATP-binding protein YdcT	1894283	1895281	999	2	44	20	32	-1	0.00457	41	12	27	-1.61	8.14e-05	12	18	15	0.22	0.36	AMD1_1983	19.6667	8.66667	59	26
AMD1_1984	putative ABC transporter membrane subunit YdcU	1895278	1896249	972	1	34	23	29	-0.45	0.22	32	17	25	-0.66	0.12	17	21	19	0.11	0.65	AMD1_1984	22.3333	33	67	99
AMD1_1985	putative ABC transporter membrane subunit YdcV	1896239	1897054	816	2	52	55	54	0.0652	0.86	49	41	45	-0.21	0.55	40	50	45	0.21	0.4	AMD1_1985	54	32	162	96
AMD1_1986	gamma-aminobutyraldehyde dehydrogenase	1897178	1898605	1428	2	173	120	147	-0.5	0.0156	162	81	121	-0.96	1.58e-05	78	109	94	0.38	0.0835	AMD1_1986	117	78.3333	351	235
AMD1_1987	Putative ester cyclase	1898780	1899268	489	2	31	31	31	-0.00783	0.99	29	19	24	-0.47	0.21	18	28	23	0.32	0.24	AMD1_1987	30	260	90	780
AMD1_1988	conserved protein of unknown function	1899273	1900439	1167	-3	132	107	120	-0.26	0.36	123	78	101	-0.6	0.0205	75	98	87	0.29	0.18	AMD1_1988	104.333	33.6667	313	101
AMD1_1989	protein of unknown function	1900357	1900707	351	-2	19	9.88	14	-0.65	0.14	18	12	15	-0.34	0.42	12	9.02	11	-0.12	0.62	AMD1_1989	9.66667	3.33333	29	10
AMD1_1990	protein of unknown function	1900572	1900889	318	-3																AMD1_1990	5.66667	61	17	183
AMD1_1991	Glucose-resistance amylase regulator	1900723	1901796	1074	1	531	277	404	-0.91	5.4e-08	496	213	355	-1.19	8.5e-11	207	253	230	0.25	0.16	AMD1_1991	269.667	11.6667	809	35
AMD1_1992	1,5-anhydro-D-fructose reductase	1901793	1902794	1002	3	375	205	290	-0.82	6.81e-05	350	153	252	-1.14	1.54e-07	149	187	168	0.27	0.15	AMD1_1992	199.333	6.33333	598	19
AMD1_1993	Caffeate CoA-transferase	1902797	1904407	1611	2	581	356	469	-0.66	0.000674	543	266	404	-0.99	1.87e-07	258	326	292	0.29	0.0939	AMD1_1993	348	23.6667	1044	71
AMD1_1994	3-hydroxypropionyl-coenzyme A dehydratase	1904400	1905179	780	3	276	146	211	-0.87	2.38e-05	258	106	182	-1.22	6.43e-08	103	133	118	0.29	0.17	AMD1_1994	142	5	426	15
AMD1_1995	Putative aldehyde dehydrogenase DhaS	1905179	1906699	1521	2	736	475	605	-0.61	3.78e-05	687	303	495	-1.15	7.48e-12	294	434	364	0.51	0.000943	AMD1_1995	463	24.3333	1389	73
AMD1_1996	putative sugar-binding periplasmic protein	1906783	1908036	1254	1	2009	1738	1873	-0.18	0.56	1877	429	1153	-2.1	4.43e-24	416	1586	1001	1.9	5.95e-24	AMD1_1996	1705	24.6667	5115	74
AMD1_1997	sn-glycerol-3-phosphate transport system permease protein UgpA	1908104	1909021	918	2	257	221	239	-0.19	0.45	240	85	162	-1.46	1.79e-12	82	202	142	1.24	5.36e-09	AMD1_1997	216.333	146.667	649	440
AMD1_1998	L-arabinose transport system permease protein AraQ	1909018	1909899	882	1	251	192	221	-0.36	0.0563	234	81	158	-1.47	5.55e-12	79	176	127	1.06	4.19e-06	AMD1_1998	188	78.3333	564	235
AMD1_1999	sn-glycerol-3-phosphate import ATP-binding protein UgpC	1909904	1911022	1119	2	515	355	435	-0.51	0.00147	481	144	312	-1.71	8.86e-22	139	324	232	1.16	1.03e-09	AMD1_1999	346.667	38.3333	1040	115
AMD1_2000	Glucose-methanol-choline (GMC) oxidoreductase:NAD binding site	1911024	1912529	1506	3	483	292	387	-0.69	2.96e-05	451	131	291	-1.76	1.56e-24	127	266	197	1.01	1.02e-07	AMD1_2000	285.333	21.6667	856	65
AMD1_2001	2-dehydro-3-deoxy-D-gluconate 5-dehydrogenase	1912526	1913302	777	2	309	230	269	-0.4	0.0313	288	101	195	-1.48	1.67e-14	98	210	154	1.05	4.94e-08	AMD1_2001	224.667	61	674	183
AMD1_2002	L-sorbose 1-dehydrogenase	1913314	1914969	1656	1	659	421	540	-0.63	2.26e-06	616	208	412	-1.54	5.14e-24	202	384	293	0.88	2.65e-08	AMD1_2002	409.667	104	1229	312
AMD1_2003	cobalamin-dependent methionine synthase	1915131	1918940	3810	3	5093	4409	4751	-0.2	0.25	4756	3496	4126	-0.42	0.0282	3389	4028	3708	0.2	0.3	AMD1_2003	4284.67	93.3333	12854	280
AMD1_2004	2FeCpFd	1919339	1920148	810	2	151	175	163	0.18	0.55	141	151	146	0.0837	0.79	146	160	153	0.0979	0.65	AMD1_2004	170.667	47	512	141
AMD1_2005	L-rhamnose operon regulatory protein RhaS	1920160	1921182	1023	-2	1094	848	971	-0.34	0.11	1022	758	890	-0.4	0.045	735	775	755	0.0567	0.81	AMD1_2005	822	30.6667	2466	92
AMD1_2006	Quercetin 2,3-dioxygenase	1921346	1921831	486	2	363	301	332	-0.25	0.27	339	164	252	-1.01	5.31e-08	159	275	217	0.73	7.14e-05	AMD1_2006	293	15.6667	879	47
AMD1_2007	FAD-containing monooxygenase EthA	1921925	1923409	1485	2	82	64	73	-0.3	0.29	76	53	65	-0.47	0.0826	51	59	55	0.12	0.62	AMD1_2007	62.3333	85	187	255
AMD1_2008	Response regulator receiver protein CpdR	1923682	1924044	363	-2	3149	3301	3225	0.0631	0.81	2941	3065	3003	0.0546	0.83	2972	3015	2994	0.0183	0.92	AMD1_2008	3221.67	32	9665	96
AMD1_2009	N-formylglutamate deformylase	1924272	1925162	891	3	1326	1486	1406	0.16	0.29	1239	1271	1255	0.033	0.89	1232	1358	1295	0.12	0.55	AMD1_2009	1447	37.6667	4341	113
AMD1_2010	Histidinol-phosphatase	1925387	1926160	774	2	1033	953	993	-0.11	0.54	965	767	866	-0.32	0.0434	744	871	808	0.2	0.18	AMD1_2010	928.667	49	2786	147
AMD1_2011	Lysophospholipase L2	1926167	1927327	1161	-1	2243	951	1597	-1.21	3.02e-17	2094	2314	2204	0.14	0.46	2244	868	1556	-1.34	5.38e-16	AMD1_2011	926.333	256.667	2779	770
AMD1_2012	small heat shock protein IbpA	1927586	1928056	471	2	1875	1674	1774	-0.0847	0.86	1750	1898	1824	0.0777	0.87	1841	1527	1684	-0.0589	0.79	AMD1_2012	1660	61.6667	4980	185
AMD1_2013	HTH-type transcriptional regulator YwnA	1928125	1928511	387	-2	70	99	85	0.43	0.0978	66	102	84	0.56	0.0336	99	90	95	-0.0853	0.74	AMD1_2013	96.3333	13.6667	289	41
AMD1_2014	Epoxide hydrolase A	1928752	1929732	981	1	142	168	155	0.21	0.45	133	157	145	0.22	0.41						AMD1_2014	163.333	97	490	291
AMD1_2015	L-threonine aldolase	1929799	1930851	1053	-2	357	361	359	0.0164	0.94	333	426	379	0.33	0.0589	413	330	372	-0.28	0.0954	AMD1_2015	352.333	53.6667	1057	161
AMD1_2016	protein of unknown function	1930887	1931036	150	3	45	34	39	-0.32	0.37	42	34	38	-0.23	0.53	33	31	32	-0.0499	0.86	AMD1_2016	32.6667	40	98	120
AMD1_2017	glutamate synthase subunit GltB	1931360	1936090	4731	2	9835	10400	10100	0.0733	0.65	9184	12200	10700	0.4	0.00409	11900	9470	10700	-0.3	0.0384	AMD1_2017	10092	273	30276	819
AMD1_2018	Glutamate synthase [NADPH] small chain	1936210	1937664	1455	1	2869	2818	2844	-0.0246	0.9	2679	3436	3058	0.34	0.02	3333	2575	2954	-0.34	0.0232	AMD1_2018	2741.67	59	8225	177
AMD1_2019	conserved exported protein of unknown function	1937730	1938974	1245	-3	1936	1604	1770	-0.26	0.0542	1808	1650	1729	-0.13	0.47	1600	1465	1532	-0.11	0.45	AMD1_2019	1564.33	47	4693	141
[truncated: 3,515 more rows]

## Sheet: SupTable6
Supplementary Table S6. Comparative proteomics data.
																Significant difference (adj. p-value ≤0.05)
M: metformin; D: dimethylamine; S: sucrose growth condition																Significantly higher in metformin condition (log2FC ≥ 1)
																Significantly higher in dimethylamine condition (log2FC ≥ 1)
								Average spectral counts								Significantly higher in sucrose condition (log2FC ≥ 1)
								per replicate
CDS identifier	1	2	3	M	DIM			D	SUCROSE			S	M/S log2FC	M/S adjp	D/S log2FC	D/S adjp	M/D log2FC	M/D adjp
AMD1_0004	21	25	25	23.6667	23	21	27	23.6667	27	24	21	24	-0.192354	0.628987	-0.150238	0.719995	-0.0421135	0.955622
AMD1_0010				#DIV/0!				#DIV/0!		1		1	-1.93988	0.543728	-1.92343	0.531372
AMD1_0013	10	12	14	12	15	14	19	16	14	15	14	14.3333	-0.425465	0.476127	0.0276179	0.967675	-0.453267	0.389394
AMD1_0014	20	20	22	20.6667	10	12	17	13	18	18	17	17.6667	0.0527459	0.952987	-0.568657	0.216258	0.621686	0.176515
AMD1_0015	5	8	6	6.33333	6	4	3	4.33333	10	7	6	7.66667	-0.440893	0.543728	-0.933385	0.201733	0.493315	0.54854
AMD1_0017				#DIV/0!			1	1	1	1	1	1	-3.24947	0.194112	-1.4013	0.531372	-1.89001	0.54854
AMD1_0018	70	67	70	69	76	69	70	71.6667	63	71	60	64.6667	-0.0794611	0.776992	0.0174159	0.96642	-0.0968851	0.717004
AMD1_0019	9	11	10	10	12	11	10	11	17	14	15	15.3333	-0.781881	0.122965	-0.604156	0.22838	-0.17773	0.798177
AMD1_0021				#DIV/0!		1		1		1	1	1	-2.73843	0.363424	-0.89126	0.695872	-1.89001	0.54854
AMD1_0023	2		1	1.5	1	2	1	1.33333		2	1	1.5	-0.153965	0.957489	0.256426	0.902396	-0.41257	0.834823
AMD1_0025	19	12	12	14.3333	15	11	10	12	24	15	20	19.6667	-0.624877	0.170623	-0.836657	0.0361114	0.211974	0.725886
AMD1_0026	5	3	1	3	2	4	3	3	4	3	3	3.33333	-0.312819	0.784648	-0.272087	0.803053	-0.0406457	0.988472
AMD1_0030	59	44	46	49.6667	60	67	75	67.3333	32	27	33	30.6667	0.520755	0.0549888	1.00098	1.81874e-07	-0.480318	0.0262086
AMD1_0034	1		1	1	2	1	2	1.66667	1		1	1	-0.145872	0.957489	1.06241	0.531372	-1.21586	0.534892
AMD1_0035	20	24	26	23.3333	28	27	16	23.6667	29	23	22	24.6667	-0.252041	0.543728	-0.189542	0.631907	-0.0624989	0.90579
AMD1_0038				#DIV/0!	1			1				#DIV/0!			1.82825	0.544165	-1.89001	0.54854
AMD1_0039				#DIV/0!		1	1	1			1	1	-1.93988	0.543728	0.685877	0.780639	-2.68094	0.379378
AMD1_0041	1	2	3	2	3	4	5	4	1	4	2	2.33333	-0.373922	0.784648	0.621173	0.544165	-0.997384	0.379378
AMD1_0042				#DIV/0!	1			1				#DIV/0!			1.82825	0.544165	-1.89001	0.54854
AMD1_0047				#DIV/0!			1	1				#DIV/0!			1.82825	0.544165	-1.89001	0.54854
AMD1_0049	14	14	14	14	14	22	21	19	14	16	15	15	-0.270391	0.578576	0.208642	0.665981	-0.47922	0.349078
AMD1_0050				#DIV/0!		1		1	1			1	-1.93988	0.543728	-0.095181	0.967675	-1.89001	0.54854
AMD1_0059			1	1	3	2	5	3.33333	1	8	3	4	-3.31709	0.00646661	-0.380825	0.708987	-2.95142	0.0390563
AMD1_0066			1	1				#DIV/0!				#DIV/0!	1.81387	0.543728			1.85922	0.54854
AMD1_0079	30	37	33	33.3333	43	44	51	46	29	31	30	30	-0.0211034	0.957489	0.484181	0.0739812	-0.505381	0.0703702
AMD1_0092	10	12	6	9.33333	4	3	7	4.66667	28	23	33	28	-1.74386	5.15796e-08	-2.68211	1.22469e-13	0.939556	0.198559
AMD1_0095				#DIV/0!				#DIV/0!		1		1	-1.93988	0.543728	-1.92343	0.531372
AMD1_0102	1	1	1	1				#DIV/0!				#DIV/0!	3.09551	0.246228			3.15126	0.219243
AMD1_0103	1		1	1	1	1	1	1	1	1		1	-0.145871	0.957489	0.393722	0.843749	-0.543608	0.798177
AMD1_0105				#DIV/0!	1		1	1	1	1	1	1	-3.24947	0.194112	-0.620237	0.758128	-2.68094	0.379378
AMD1_0109				#DIV/0!				#DIV/0!		1	1	1	-2.73843	0.363424	-2.71951	0.333646
AMD1_0111				#DIV/0!		1		1			1	1	-1.93988	0.543728	-0.0951824	0.967675	-1.89001	0.54854
AMD1_0114				#DIV/0!			1	1				#DIV/0!			1.82825	0.544165	-1.89001	0.54854
AMD1_0118	7	6	7	6.66667	7	6	6	6.33333	9	7	4	6.66667	-0.169998	0.851192	-0.200975	0.803053	0.0310613	0.988472
AMD1_0130	1	3	2	2	1	1		1	3	1	1	1.66667	0.0841009	0.957489	-1.29432	0.483727	1.38675	0.406826
AMD1_0134	1	1	2	1.33333	2	1	2	1.66667	1	1	2	1.33333	-0.15836	0.9572	0.176304	0.94051	-0.336031	0.851951
AMD1_0135				#DIV/0!				#DIV/0!	2	1	1	1.33333	-3.62608	0.100903	-3.60561	0.079583
AMD1_0136	7	6	5	6	6	5	6	5.66667	6	10	7	7.66667	-0.517256	0.543728	-0.55634	0.506155	0.0392808	0.988472
AMD1_0140				#DIV/0!				#DIV/0!	1			1	-1.93988	0.543728	-1.92343	0.531372
AMD1_0141				#DIV/0!				#DIV/0!			1	1	-1.93988	0.543728	-1.92343	0.531372
AMD1_0143				#DIV/0!				#DIV/0!		1		1	-1.93988	0.543728	-1.92343	0.531372
AMD1_0145	1	1	1	1	1	1	1	1	5	2	2	3	-1.63407	0.226221	-1.59491	0.205853	-0.0376364	0.988472
AMD1_0148	26	20	25	23.6667	13	16	13	14	45	42	46	44.3333	-1.07448	4.11834e-06	-1.78428	7.60325e-13	0.710162	0.0824841
AMD1_0149	1	2	2	1.66667	2	1	3	2	1	2	3	2	-0.40823	0.784648	-0.123158	0.956433	-0.285777	0.861684
AMD1_0161				#DIV/0!				#DIV/0!	2		1	1.5	-3.24947	0.209849	-3.22955	0.163558
AMD1_0163	36	36	34	35.3333	14	16	18	16	55	56	49	53.3333	-0.764965	0.000312895	-1.8593	1.0008e-15	1.09473	0.000211826
AMD1_0165	12	14	16	14	12	12	15	13	21	24	22	22.3333	-0.840942	0.0273892	-0.904798	0.0115433	0.0639846	0.93694
AMD1_0166		1		1				#DIV/0!	1	1	1	1	-1.4356	0.543728	-3.22955	0.148116	1.85922	0.54854
AMD1_0167	38	57	50	48.3333	9	9	10	9.33333	34	31	24	29.6667	0.529234	0.0548922	-1.78495	8.70404e-09	2.31507	2.59786e-17
AMD1_0193	1	1	1	1				#DIV/0!	1	1	3	1.66667	-0.828939	0.578576	-3.90364	0.0443982	3.15126	0.219243
AMD1_0194				#DIV/0!			1	1				#DIV/0!			1.82825	0.544165	-1.89001	0.54854
AMD1_0195				#DIV/0!	1	1	3	1.66667	1	2	2	1.66667	-3.92445	0.0549888	-0.121727	0.956433	-3.86115	0.0737219
AMD1_0196	11	14	6	10.3333			1	1	10	16	18	14.6667	-0.671558	0.209849	-5.12482	1.59917e-12	4.47581	3.90304e-07
AMD1_0203				#DIV/0!				#DIV/0!	1	1		1	-2.73843	0.363424	-2.71951	0.333646
AMD1_0209	2			2				#DIV/0!	1	2	1	1.33333	-1.03352	0.543728	-3.60561	0.079583	2.64529	0.380162
AMD1_0213	1			1				#DIV/0!			1	1	-0.126006	0.957489	-1.92343	0.531372	1.85922	0.54854
AMD1_0214			1	1				#DIV/0!	1	1		1	-0.924563	0.69208	-2.71951	0.333646	1.85922	0.54854
AMD1_0215	1	1	1	1				#DIV/0!		1		1	1.15563	0.569177	-1.92343	0.531372	3.15126	0.219243
AMD1_0223	2	1	1	1.33333	1	1	3	1.66667	3	2	2	2.33333	-0.914746	0.543728	-0.579344	0.6639	-0.336027	0.851951
AMD1_0225	11	9	6	8.66667	7	8	11	8.66667	7	9	4	6.66667	0.202011	0.786205	0.243655	0.74611	-0.041731	0.988472
AMD1_0228	2	3	3	2.66667	1	1	1	1	3	4	3	3.33333	-0.47514	0.674972	-1.74139	0.14599	1.27216	0.379378
AMD1_0229	2	5	6	4.33333	5	4	3	4	8	7	7	7.33333	-0.911663	0.255673	-0.982224	0.186158	0.0709997	0.981878
AMD1_0232	1	1	1	1				#DIV/0!				#DIV/0!	3.09551	0.246228			3.15126	0.219243
AMD1_0233	1			1				#DIV/0!		1		1	-0.126005	0.957489	-1.92343	0.531372	1.85922	0.54854
AMD1_0235	1			1	1	1	1	1	2	2	1	1.66667	-2.11057	0.261159	-0.790407	0.601155	-1.32968	0.54854
AMD1_0236		1		1				#DIV/0!		1		1	-0.126006	0.957489	-1.92343	0.531372	1.85922	0.54854
AMD1_0238	8	9	11	9.33333	8	10	8	8.66667	15	12	11	12.6667	-0.606742	0.317903	-0.670267	0.228798	0.0636858	0.959577
AMD1_0239			1	1				#DIV/0!				#DIV/0!	1.81387	0.543728			1.85922	0.54854
AMD1_0240	2	1		1.5			1	1		1		1	1.15563	0.569177	-0.0951846	0.967675	1.26125	0.54854
AMD1_0243		1		1				#DIV/0!				#DIV/0!	1.81387	0.543728			1.85922	0.54854
AMD1_0249	2	4	2	2.66667	4	6	2	4	9	4	5	6	-1.30113	0.144897	-0.697837	0.441354	-0.604025	0.549288
AMD1_0251	2	2	4	2.66667	2	1	2	1.66667	2	2	4	2.66667	-0.165442	0.941373	-0.763187	0.544165	0.599909	0.653025
AMD1_0252	3	2	1	2	2	4	3	3		1	3	2	0.382467	0.800814	0.976916	0.501019	-0.596642	0.629531
AMD1_0253	15	9	10	11.3333	18	21	25	21.3333	7	7	7	7	0.514714	0.477378	1.46125	0.000161097	-0.947116	0.0208518
AMD1_0265		1	1	1				#DIV/0!	6	5	5	5.33333	-2.94311	0.00270346	-5.51387	1.66378e-05	2.64529	0.379378
AMD1_0267	1			1				#DIV/0!				#DIV/0!	1.81387	0.543728			1.85922	0.54854
AMD1_0268	2			2				#DIV/0!		1		1	0.652686	0.793279	-1.92343	0.531372	2.64529	0.380162
AMD1_0269	12	15	12	13	20	18	18	18.6667	17	12	22	17	-0.555521	0.265336	0.00405673	0.992353	-0.559779	0.243882
AMD1_0270	2	3	2	2.33333	2	3	1	2	1	3	2	2	0.0465186	0.967272	-0.123151	0.956433	0.170196	0.919548
AMD1_0273	2	5	4	3.66667	2	2	4	2.66667	3	3	3	3	0.112101	0.9572	-0.288036	0.803053	0.401013	0.747121
AMD1_0278	8	10	6	8	3	8	9	6.66667	9	10	9	9.33333	-0.389931	0.543728	-0.606604	0.363679	0.216983	0.791097
AMD1_0282	12	6	8	8.66667	2	2	1	1.66667	144	113	135	130.667	-4.06686	8.29527e-27	-6.31605	1.22522e-31	2.25427	0.00261106
AMD1_0283				#DIV/0!				#DIV/0!			1	1	-1.93988	0.543728	-1.92343	0.531372
AMD1_0284				#DIV/0!				#DIV/0!	9	7	9	8.33333	-6.16828	2.73635e-08	-6.14631	2.49275e-08
AMD1_0285	1	1		1				#DIV/0!	38	44	37	39.6667	-5.81075	2.51671e-21	-8.38109	2.56237e-23	2.64529	0.379378
AMD1_0286				#DIV/0!				#DIV/0!	16	16	13	15	-7.00734	1.23321e-14	-6.98523	1.28994e-14
AMD1_0306	1			1				#DIV/0!	1			1	-0.126004	0.957489	-1.92343	0.531372	1.85922	0.54854
AMD1_0307	6	5	3	4.66667	5	6	7	6	4	2	5	3.66667	0.169619	0.898949	0.56452	0.531372	-0.395535	0.653025
AMD1_0309	6	5	7	6	8	9	11	9.33333	6	7	6	6.33333	-0.246199	0.782059	0.421705	0.541351	-0.668501	0.379378
AMD1_0310	10	6	7	7.66667	2	2	3	2.33333	6	6	5	5.66667	0.258025	0.761422	-1.36241	0.109191	1.62333	0.0437358
AMD1_0311	1			1				#DIV/0!	3		1	2	-1.81221	0.380028	-3.60561	0.079583	1.85922	0.54854
AMD1_0316				#DIV/0!				#DIV/0!			1	1	-1.93988	0.543728	-1.92343	0.531372
AMD1_0317				#DIV/0!	1	3	2	2				#DIV/0!			4.02736	0.0378296	-4.10754	0.0437358
AMD1_0330	1			1				#DIV/0!				#DIV/0!	1.81387	0.543728			1.85922	0.54854
AMD1_0331	19	11	15	15	2	1	2	1.66667	13	15	14	14	-0.0730183	0.941485	-3.10459	2.71853e-08	3.03688	2.43229e-07
AMD1_0334	6	5	6	5.66667	3	1		2	10	6	7	7.66667	-0.597883	0.47071	-2.54181	0.00052154	1.94959	0.045958
AMD1_0335	1			1				#DIV/0!				#DIV/0!	1.81387	0.543728			1.85922	0.54854
AMD1_0337	2			2	1			1				#DIV/0!	2.59256	0.416127	1.82825	0.544165	0.755279	0.773004
AMD1_0339	11	12	9	10.6667	4	3	5	4	13	15	10	12.6667	-0.416623	0.532274	-1.76097	0.00049934	1.346	0.038877
AMD1_0352			1	1				#DIV/0!				#DIV/0!	1.81387	0.543728			1.85922	0.54854
AMD1_0354	9	11	14	11.3333	17	23	26	22	16	15	13	14.6667	-0.539899	0.351447	0.450963	0.333646	-0.991263	0.0129889
AMD1_0357	1	2	1	1.33333				#DIV/0!	1	1	2	1.33333	-0.15836	0.9572	-3.60561	0.079583	3.52512	0.122697
AMD1_0358			1	1				#DIV/0!	1	1		1	-0.924563	0.69208	-2.71951	0.333646	1.85922	0.54854
AMD1_0361	37	33	28	32.6667	22	25	27	24.6667	54	60	55	56.3333	-0.95652	2.27658e-06	-1.31771	1.75744e-10	0.361328	0.357339
AMD1_0362	1			1				#DIV/0!				#DIV/0!	1.81387	0.543728			1.85922	0.54854
AMD1_0366	2	2	2	2	2	2	4	2.66667	1	2	4	2.33333	-0.373922	0.784648	0.0588481	0.967675	-0.433808	0.753146
AMD1_0368	1	1		1	2	3	2	2.33333		2	3	2.5	-1.33189	0.479425	0.333421	0.803197	-1.67264	0.311726
AMD1_0371	12	13	14	13	6	6	11	7.66667	18	15	15	16	-0.468672	0.380028	-1.17859	0.00660042	0.710522	0.232023
AMD1_0376				#DIV/0!				#DIV/0!			1	1	-1.93988	0.543728	-1.92343	0.531372
AMD1_0380				#DIV/0!				#DIV/0!	1		1	1	-2.73843	0.363424	-2.71951	0.333646
AMD1_0381		1		1				#DIV/0!				#DIV/0!	1.81387	0.543728			1.85922	0.54854
AMD1_0382	3	3	4	3.33333	2	2	4	2.66667	1	2	3	2	0.537646	0.651311	0.269589	0.836287	0.268326	0.836078
AMD1_0385	9	10	11	10	5	8	7	6.66667	11	12	15	12.6667	-0.508559	0.398662	-1.04237	0.0443982	0.534394	0.458633
AMD1_0392	2	1	2	1.66667	4	3	2	3	4	5	3	4	-1.36763	0.22841	-0.526784	0.590129	-0.842574	0.54854
AMD1_0401	1			1		1	2	1.5	2	1	3	2	-2.35769	0.183141	-1.03729	0.531372	-1.32968	0.54854
AMD1_0403		2	2	2			1	1			1	1	1.52784	0.505133	-0.0951852	0.967675	1.63511	0.431849
AMD1_0405	3	3	1	2.33333	3	3	3	3	4	4	3	3.66667	-0.791091	0.539617	-0.40505	0.703204	-0.386593	0.771132
AMD1_0410	19	16	15	16.6667	10	9	6	8.33333	26	23	23	24	-0.694873	0.0681498	-1.64161	1.73974e-06	0.947425	0.056859
AMD1_0411				#DIV/0!				#DIV/0!	1			1	-1.93988	0.543728	-1.92343	0.531372
AMD1_0414	5	4	5	4.66667	1		2	1.5	4	3	3	3.33333	0.30265	0.783744	-1.74139	0.14599	2.05117	0.0658633
AMD1_0428	1	1		1				#DIV/0!	1	2		1.5	-0.656911	0.753136	-3.22955	0.163558	2.64529	0.379378
AMD1_0430	8	12	11	10.3333	9	6	8	7.66667	9	9	10	9.33333	-0.0260165	0.963054	-0.408587	0.531372	0.382899	0.54854
AMD1_0433	4	10	6	6.66667	5	8	7	6.66667	10	6	6	7.33333	-0.305232	0.69093	-0.263631	0.732562	-0.0415635	0.988472
AMD1_0434	1		1	1	2	1	1	1.33333	2	1	4	2.33333	-1.78991	0.253578	-0.875284	0.531372	-0.918543	0.612168
AMD1_0435	1	2	3	2	4	2	3	3	3	4	3	3.33333	-0.867592	0.514085	-0.272088	0.803053	-0.596643	0.629531
AMD1_0438	1	4	2	2.33333	1			1	4	6	2	4	-0.912885	0.416127	-3.28106	0.00496458	2.38773	0.157367
AMD1_0448	22	19	16	19	22	20	19	20.3333	20	21	19	20	-0.245609	0.562183	-0.106334	0.813719	-0.139305	0.776628
AMD1_0452		1		1	1	1	2	1.33333				#DIV/0!	1.81387	0.543728	3.48597	0.110922	-1.70461	0.402125
AMD1_0453	2	1	2	1.66667	2	2	1	1.66667	1	1	1	1	0.513856	0.776992	0.552371	0.744121	-0.0393884	0.988472
AMD1_0472	16	14	15	15	7	8	11	8.66667	20	19	21	20	-0.583987	0.194112	-1.3243	0.000415168	0.740869	0.176906
AMD1_0478	4	2	3	3			1	1	2	1	1	1.33333	0.93724	0.543728	-1.77736	0.360621	2.73368	0.0732568
AMD1_0480		1		1			1	1	1		1	1	-0.924563	0.69208	-0.891262	0.695872	-0.0307924	0.988472
AMD1_0481	11	9	5	8.33333	7	10	8	8.33333	11	9	12	10.6667	-0.522377	0.438193	-0.480593	0.483727	-0.0417145	0.988472
AMD1_0484	8	7	4	6.33333	4	6	6	5.33333	4	4	3	3.66667	0.599673	0.543728	0.398436	0.666521	0.201258	0.834823
AMD1_0492		2	1	1.5				#DIV/0!	2	2		2	-0.53057	0.776992	-3.60561	0.079583	3.15126	0.22567
AMD1_0502	6	4	4	4.66667	4	5	8	5.66667	10	7	9	8.66667	-1.04531	0.144897	-0.730668	0.321721	-0.314775	0.750322
AMD1_0504	1			1	1			1		1		1	-0.126005	0.957489	-0.0951818	0.967675	-0.0307943	0.988472
AMD1_0507				#DIV/0!				#DIV/0!			1	1	-1.93988	0.543728	-1.92343	0.531372
AMD1_0509	12	10	9	10.3333	5		4	4.5	21	24	22	22.3333	-1.27427	0.000355429	-2.97319	4.2706e-08	1.70149	0.00934682
AMD1_0529	1	1	1	1				#DIV/0!		1	1	1	0.357073	0.889923	-2.71951	0.333646	3.15126	0.219243
AMD1_0553	6	8	6	6.66667	7	7	10	8	2	3	5	3.33333	0.805221	0.380028	1.10481	0.139794	-0.300223	0.711115
AMD1_0559	3	3	4	3.33333	2	2	2	2	1	5	2	2.66667	0.142764	0.941485	-0.517739	0.675242	0.662284	0.557865
AMD1_0581	2	3	6	3.66667	1	2	2	1.66667	3	3	2	2.66667	0.275246	0.811156	-0.763185	0.544165	1.04136	0.380726
AMD1_0584	1			1				#DIV/0!				#DIV/0!	1.81387	0.543728			1.85922	0.54854
AMD1_0585				#DIV/0!				#DIV/0!	1	1		1	-2.73843	0.363424	-2.71951	0.333646
AMD1_0595	1			1				#DIV/0!				#DIV/0!	1.81387	0.543728			1.85922	0.54854
AMD1_0606		1		1				#DIV/0!				#DIV/0!	1.81387	0.543728			1.85922	0.54854
AMD1_0613			2	2				#DIV/0!	1		1	1	-0.145873	0.957489	-2.71951	0.333646	2.64529	0.380162
AMD1_0621	1	1	1	1				#DIV/0!	1			1	1.15563	0.569177	-1.92343	0.531372	3.15126	0.219243
AMD1_0639				#DIV/0!	1	1	1	1				#DIV/0!			3.11323	0.19086	-3.1889	0.219243
AMD1_0641				#DIV/0!				#DIV/0!	1			1	-1.93988	0.543728	-1.92343	0.531372
AMD1_0646	2	4	3	3	2	1	1	1.33333	3	2	3	2.66667	-0.00312372	0.996289	-1.05913	0.45424	1.05986	0.433499
AMD1_0654		1		1				#DIV/0!	1			1	-0.126005	0.957489	-1.92343	0.531372	1.85922	0.54854
AMD1_0656			1	1				#DIV/0!	2	1	2	1.66667	-2.11058	0.261159	-3.90364	0.0443982	1.85922	0.54854
AMD1_0680				#DIV/0!	3	2	4	3				#DIV/0!			4.58253	0.00577502	-4.66433	0.00703535
AMD1_0701	9	3	2	4.66667	10	15	17	14	16	16	13	15	-1.82855	8.58062e-05	-0.228416	0.66306	-1.60124	0.00217309
AMD1_0702	6	2	2	3.33333	4	4	5	4.33333	2	3	3	2.66667	0.142767	0.941485	0.549293	0.575652	-0.407406	0.713331
AMD1_0703	11	8	8	9	3	7	7	5.66667	8	8	8	8	-0.00321169	0.994873	-0.616821	0.416714	0.614257	0.402125
AMD1_0704				#DIV/0!			1	1	1		1	1	-2.73843	0.363424	-0.891262	0.695872	-1.89001	0.54854
AMD1_0705	76	78	86	80	89	80	73	80.6667	75	83	74	77.3333	-0.124083	0.55786	-0.0698234	0.776001	-0.0542613	0.835895
AMD1_0708	1	1		1	1	1		1	1	3	2	2	-1.579	0.363424	-1.5412	0.333646	-0.0356573	0.988472
AMD1_0711	1	1	3	1.66667				#DIV/0!	11	9	11	10.3333	-2.71141	1.91629e-05	-6.4527	3.3141e-10	3.82176	0.0800239
AMD1_0716				#DIV/0!			1	1			2	2	-2.73844	0.377295	-0.891263	0.705172	-1.89001	0.54854
AMD1_0718	5	2	4	3.66667	8	7	5	6.66667	2	5	5	4	-0.289277	0.784648	0.591715	0.531372	-0.882191	0.333121
AMD1_0720				#DIV/0!	1		1	1	2	1		1.5	-3.24947	0.209849	-0.620236	0.758128	-2.68094	0.379378
AMD1_0724				#DIV/0!	1			1	1	1	1	1	-3.24947	0.194112	-1.4013	0.531372	-1.89001	0.54854
AMD1_0725	5	5	4	4.66667	2	1		1.5	8	5	6	6.33333	-0.599889	0.534302	-2.64357	0.0014541	2.05117	0.0658633
AMD1_0726		1		1				#DIV/0!				#DIV/0!	1.81387	0.543728			1.85922	0.54854
AMD1_0727	4	5	4	4.33333	4	4	3	3.66667	3	2	3	2.66667	0.508493	0.610944	0.315947	0.781206	0.192621	0.862414
AMD1_0728	12	9	11	10.6667	15	16	18	16.3333	9	15	14	12.6667	-0.416628	0.532274	0.233898	0.653869	-0.650831	0.219243
AMD1_0739	3	4	4	3.66667	3	2	4	3	7	4	5	5.33333	-0.693983	0.500611	-0.93134	0.333646	0.238182	0.851951
AMD1_0740	10	14	8	10.6667	3	4	4	3.66667	5	3	2	3.33333	1.47272	0.0226815	0.00643029	0.992914	1.46762	0.0217271
AMD1_0741	3	7	5	5	2	2	3	2.33333	4	5	6	5	-0.16897	0.887422	-1.1858	0.205421	1.01912	0.349078
AMD1_0742	3	2	3	2.66667				#DIV/0!	1	2	1	1.33333	0.774921	0.543728	-3.60561	0.079583	4.46106	0.0162542
AMD1_0745	5	7	7	6.33333	6	8	7	7	6	6	6	6	-0.0932956	0.950413	0.0898171	0.94051	-0.183289	0.836078
AMD1_0751		1		1				#DIV/0!			1	1	-0.126007	0.957489	-1.92343	0.531372	1.85922	0.54854
AMD1_0752			1	1				#DIV/0!	1	1	1	1	-1.4356	0.543728	-3.22955	0.148116	1.85922	0.54854
AMD1_0758				#DIV/0!		1	3	2		1	1	1	-2.73843	0.363424	0.766458	0.673882	-3.56383	0.122697
AMD1_0759	3		1	2	2	2	2	2	3	3	3	3	-1.26186	0.363424	-0.68078	0.545102	-0.582422	0.717004
AMD1_0760	2	3	4	3	2	2	3	2.33333	5	3	4	4	-0.567645	0.560083	-0.872257	0.440622	0.305759	0.827823
AMD1_0762				#DIV/0!	1	1	1	1	2	2	1	1.66667	-3.92444	0.0549888	-0.790407	0.601155	-3.1889	0.219243
AMD1_0763				#DIV/0!	2	1	1	1.33333	1	1	1	1	-3.24947	0.194112	0.256427	0.902396	-3.56383	0.122697
AMD1_0764	83	75	72	76.6667	105	113	94	104	106	99	91	98.6667	-0.536361	0.000369017	-0.0547813	0.79226	-0.481609	0.00261106
AMD1_0767		1	1	1	1			1		1		1	0.652684	0.786205	-0.0951818	0.967675	0.755277	0.771132
AMD1_0770	9	7	10	8.66667	12	11	9	10.6667	12	14	10	12	-0.634839	0.310034	-0.297474	0.591854	-0.337509	0.59153
AMD1_0772	1	1	3	1.66667	2	4		3	3	4	1	2.66667	-0.80311	0.543728	-0.517731	0.675242	-0.285785	0.861684
AMD1_0773	2	5	4	3.66667	5	1	1	2.33333	6	5	7	6	-0.860451	0.363424	-1.44322	0.079583	0.58458	0.599454
AMD1_0774	4	4	5	4.33333	4	6	4	4.66667	6	5	5	5.33333	-0.460736	0.578576	-0.315573	0.72836	-0.14522	0.898153
AMD1_0777				#DIV/0!		1	1	1	1	2	2	1.66667	-3.92445	0.0549888	-1.29433	0.483727	-2.68094	0.379378
AMD1_0781				#DIV/0!		1		1	1	1		1	-2.73843	0.363424	-0.891258	0.695872	-1.89001	0.54854
AMD1_0782	6	10	7	7.66667	9	8	10	9	8	13	12	11	-0.684633	0.287875	-0.415129	0.531372	-0.269603	0.717483
AMD1_0783	2	2	2	2	1	1	4	2	1	3	4	2.66667	-0.557895	0.653819	-0.517745	0.675242	-0.0398447	0.988472
AMD1_0784		2	3	2.5	3	3	3	3	3	1	1	1.66667	-0.161117	0.954993	0.678892	0.563113	-0.842573	0.54854
AMD1_0785	4	8	10	7.33333	8	5	7	6.66667	9	8	5	7.33333	-0.170287	0.835952	-0.263631	0.732562	0.093489	0.928425
AMD1_0786	6	7	8	7	10	10	11	10.3333	9	7	11	9	-0.52742	0.498628	0.0675864	0.947096	-0.595407	0.379378
AMD1_0787	1	1	1	1				#DIV/0!				#DIV/0!	3.09551	0.246228			3.15126	0.219243
AMD1_0789	1	1	1	1		1	2	1.5				#DIV/0!	3.09551	0.246228	3.11323	0.205853	-0.0376336	0.988472
AMD1_0790	1	3	2	2	2	4	6	4	1	4	5	3.33333	-0.867595	0.514085	0.127809	0.934537	-0.997381	0.379378
AMD1_0791	3	1		2		1	1	1				#DIV/0!	3.46772	0.16446	2.60931	0.360621	0.844177	0.653025
AMD1_0792	27	27	30	28	37	30	34	33.6667	38	34	26	32.6667	-0.393941	0.261159	-0.0870054	0.803053	-0.306986	0.386881
AMD1_0793	1			1	1	1		1	1	1	1	1	-1.4356	0.543728	-0.620235	0.758128	-0.82173	0.753146
AMD1_0794		1		1				#DIV/0!			1	1	-0.126007	0.957489	-1.92343	0.531372	1.85922	0.54854
AMD1_0798	3	5	6	4.66667	6	8	9	7.66667	8	7	7	7.33333	-0.807807	0.330103	-0.0656242	0.956433	-0.742852	0.379378
AMD1_0800				#DIV/0!	2	3	1	2				#DIV/0!			4.02737	0.0378296	-4.10755	0.0437358
AMD1_0802				#DIV/0!				#DIV/0!	1			1	-1.93988	0.543728	-1.92343	0.531372
AMD1_0804	2	1	1	1.33333	2			2	3	3	2	2.66667	-1.09872	0.443211	-1.93579	0.148116	0.844173	0.653025
AMD1_0805	1	1	1	1				#DIV/0!	1	1	2	1.33333	-0.530571	0.776992	-3.60561	0.079583	3.15126	0.219243
AMD1_0806	3	3	2	2.66667	1	2	1	1.33333	4	5	1	3.33333	-0.475137	0.674972	-1.36864	0.257299	0.897228	0.54854
AMD1_0807	3	2	5	3.33333	3	1		2	4	3	1	2.66667	0.142767	0.941485	-1.05912	0.45424	1.20599	0.379378
AMD1_0808	3	2	3	2.66667	3	3	4	3.33333	5	2	5	4	-0.729962	0.543728	-0.38082	0.708987	-0.349576	0.775037
AMD1_0811	1	3	1	1.66667	2	2	2	2	1		1	1	1.02489	0.543728	1.30785	0.45424	-0.28578	0.861684
AMD1_0815	13	14	10	12.3333	15	13	10	12.6667	13	14	12	13	-0.2467	0.658834	-0.166688	0.780639	-0.0800229	0.908923
AMD1_0816	5	3	2	3.33333	1	2	3	2	2	2	4	2.66667	0.142765	0.941485	-0.517742	0.675242	0.662288	0.557865
AMD1_0819	1			1				#DIV/0!			1	1	-0.126006	0.957489	-1.92343	0.531372	1.85922	0.54854
AMD1_0820	4	3	3	3.33333	6	4	4	4.66667	7	8	7	7.33333	-1.27739	0.0990385	-0.766368	0.333646	-0.511476	0.598253
AMD1_0822	5	5	3	4.33333	10	10	6	8.66667	7	6	7	6.66667	-0.776431	0.363424	0.243667	0.74611	-1.02109	0.164209
AMD1_0826	1	1	1	1	2		1	1.5	4	3	4	3.66667	-1.91366	0.109559	-1.87435	0.0921909	-0.0376365	0.988472
AMD1_0827				#DIV/0!	2		2	2	1	1		1	-2.73843	0.363424	0.766462	0.673882	-3.56383	0.122697
AMD1_0828	6	10	11	9	9	9	11	9.66667	4	3	5	4	0.976049	0.198295	1.11913	0.0831117	-0.14351	0.851951
AMD1_0830	10	13	14	12.3333	10	10	8	9.33333	8	9	9	8.66667	0.331812	0.569177	-0.0235983	0.967675	0.355598	0.54854
AMD1_0831		1		1				#DIV/0!				#DIV/0!	1.81387	0.543728			1.85922	0.54854
AMD1_0836	1	1	2	1.33333	2	1	2	1.66667	2	2	2	2	-0.703837	0.610944	-0.368602	0.801191	-0.336031	0.851951
AMD1_0841		1		1			1	1				#DIV/0!	1.81387	0.543728	1.82825	0.544165	-0.0307924	0.988472
AMD1_0842	2			2	2	2	2	2	1		1	1	-0.145871	0.957489	1.30785	0.45424	-1.46225	0.379378
AMD1_0844	4	2	4	3.33333	1	3	2	2		1		1	2.76933	0.055989	2.10393	0.224449	0.662285	0.557865
AMD1_0850	1	3	3	2.33333	3	6	7	5.33333	4	1	5	3.33333	-0.658063	0.543728	0.531395	0.545102	-1.19156	0.219243
AMD1_0851	3	1		2	1		1	1				#DIV/0!	3.46772	0.16446	2.60931	0.360621	0.844177	0.653025
AMD1_0854	1			1				#DIV/0!				#DIV/0!	1.81387	0.543728			1.85922	0.54854
AMD1_0859	12	23	28	21	35	25	26	28.6667	23	26	20	23	-0.302714	0.535995	0.186002	0.626251	-0.488841	0.205491
AMD1_0861		2	1	1.5			2	2	1	2	1	1.33333	-0.530572	0.776992	-0.996304	0.545322	0.470319	0.834823
AMD1_0867			2	2	2	1		1.5	1			1	0.652685	0.793279	1.1898	0.545322	-0.543611	0.798177
AMD1_0868				#DIV/0!		1	1	1	4	1	4	3	-4.72958	0.0034457	-2.09883	0.0977367	-2.68094	0.379378
AMD1_0869	7	9	7	7.66667	11	12	8	10.3333	12	12	11	11.6667	-0.768646	0.207479	-0.302477	0.591593	-0.466405	0.534892
AMD1_0873	21	21	18	20	33	35	38	35.3333	25	29	29	27.6667	-0.637926	0.0704042	0.221145	0.531372	-0.859266	0.0035531
AMD1_0879	38	39	41	39.3333	44	37	44	41.6667	39	39	37	38.3333	-0.135597	0.680574	-0.0105192	0.967675	-0.125094	0.717483
AMD1_0884	13	13	13	13	10	8	7	8.33333	9	7	9	8.33333	0.462789	0.499202	-0.128908	0.860948	0.592041	0.357339
AMD1_0885				#DIV/0!				#DIV/0!			1	1	-1.93988	0.543728	-1.92343	0.531372
AMD1_0890	2		1	1.5	1		2	1.5		1		1	1.15563	0.569177	1.1898	0.545322	-0.0376327	0.988472
AMD1_0898	1	1		1	1			1				#DIV/0!	2.59256	0.398662	1.82825	0.544165	0.755278	0.771132
AMD1_0908	4	2		3	1	2	5	2.66667	3	3	1	2.33333	-0.373917	0.784648	0.0588486	0.967675	-0.433804	0.753146
AMD1_0909	2		2	2	1	1	4	2	2	1		1.5	0.218248	0.941485	0.797812	0.58255	-0.582418	0.717004
AMD1_0910				#DIV/0!	1		1	1	1		1	1	-2.73843	0.363424	-0.1102	0.967675	-2.68094	0.379378
AMD1_0917	6	3	6	5	10	13	10	11	10	8	11	9.66667	-1.10398	0.0920807	0.0549064	0.956433	-1.15977	0.0650951
AMD1_0962	10	6	5	7	4	11	8	7.66667	10	17	13	13.3333	-1.0884	0.0365986	-0.917688	0.0734808	-0.170669	0.843109
AMD1_0963	3	4	6	4.33333	5	2	1	2.66667	6	6	5	5.66667	-0.546369	0.543728	-1.17936	0.165706	0.634573	0.54854
AMD1_0964	2		3	2.5		1	4	2.5	7	9	2	6	-1.9388	0.0247529	-1.89837	0.151229	-0.0393799	0.988472
AMD1_0965		2		2				#DIV/0!	3	6	3	4	-2.5384	0.0273892	-5.10932	0.000300907	2.64529	0.380162
AMD1_0969	2	2	2	2				#DIV/0!		1	1	1	1.27011	0.498628	-2.71951	0.333646	4.06769	0.0477841
AMD1_0980				#DIV/0!				#DIV/0!			1	1	-1.93988	0.543728	-1.92343	0.531372
AMD1_0986			1	1				#DIV/0!				#DIV/0!	1.81387	0.543728			1.85922	0.54854
AMD1_0988	1		1	1				#DIV/0!				#DIV/0!	2.59256	0.398662			2.64529	0.379378
AMD1_0989			1	1				#DIV/0!				#DIV/0!	1.81387	0.543728			1.85922	0.54854
AMD1_0990		1		1	1			1			1	1	-0.126007	0.957489	-0.0951824	0.967675	-0.0307952	0.988472
AMD1_0991	2	4	3	3	1	2	2	1.66667				#DIV/0!	4.56332	0.00953872	3.78192	0.0678104	0.762537	0.54854
AMD1_0992	1			1				#DIV/0!	1	1	1	1	-1.4356	0.543728	-3.22955	0.148116	1.85922	0.54854
AMD1_0995	3	2	1	2	1	1		1	2	2	2	2	-0.16301	0.946017	-1.5412	0.333646	1.38675	0.406826
AMD1_0998	1	1	1	1	1	1	1	1	1	1	1	1	-0.153966	0.957489	-0.116316	0.96642	-0.0376364	0.988472
AMD1_0999	2	1		1.5				#DIV/0!				#DIV/0!	3.09551	0.261159			3.15126	0.22567
AMD1_1003	42	45	51	46	30	25	36	30.3333	69	62	59	63.3333	-0.633039	0.0012331	-1.18943	4.47317e-10	0.556525	0.0456827
AMD1_1004		1		1	1			1				#DIV/0!	1.81387	0.543728	1.82825	0.544165	-0.0307952	0.988472
AMD1_1005	16	17	18	17	47	42	58	49	7	10	11	9.33333	0.685032	0.194112	2.24696	1.1254e-15	-1.56247	1.06837e-10
AMD1_1009				#DIV/0!	2	1	1	1.33333			1	1	-1.93988	0.543728	1.56254	0.474476	-3.56383	0.122697
AMD1_1012	14	11	8	11	13	12	18	14.3333	16	16	18	16.6667	-0.765509	0.110572	-0.345648	0.531372	-0.420004	0.484065
AMD1_1014				#DIV/0!				#DIV/0!			1	1	-1.93988	0.543728	-1.92343	0.531372
AMD1_1018	2	2	2	2	1	2	1	1.33333	2	3	1	2	-0.16301	0.946017	-0.664542	0.642618	0.503861	0.753146
AMD1_1019				#DIV/0!				#DIV/0!		1	1	1	-2.73843	0.363424	-2.71951	0.333646
AMD1_1020				#DIV/0!	1	1	1	1			1	1	-1.93988	0.543728	1.1898	0.545322	-3.1889	0.219243
AMD1_1025	27	26	27	26.6667	29	32	27	29.3333	26	23	25	24.6667	-0.0604159	0.929734	0.118593	0.778537	-0.179053	0.648705
AMD1_1040	6	10	7	7.66667	5	7	11	7.66667	7	7	8	7.33333	-0.107272	0.935038	-0.0656311	0.956433	-0.0416543	0.988472
AMD1_1044	2	1	1	1.33333	1	1	1	1	2	1	1	1.33333	-0.158358	0.9572	-0.492379	0.780639	0.336223	0.861684
AMD1_1048		1		1	1			1				#DIV/0!	1.81387	0.543728	1.82825	0.544165	-0.0307952	0.988472
AMD1_1054	108	107	98	104.333	99	102	117	106	61	72	64	65.6667	0.494033	0.00222416	0.559121	0.000184745	-0.0651046	0.768022
AMD1_1056	3	8	14	8.33333	17	17	25	19.6667	9	28	14	17	-1.18894	0.40269	0.0788167	0.94051	-1.26833	0.00247533
AMD1_1057	11	17	19	15.6667	27	23	18	22.6667	24	25	23	24	-0.783422	0.0331928	-0.212155	0.58255	-0.571419	0.184073
AMD1_1058	11	8	10	9.66667	5	5	10	6.66667	17	12	12	13.6667	-0.665464	0.240476	-1.15101	0.0174575	0.486118	0.537422
AMD1_1059				#DIV/0!		2	1	1.5	1	1		1	-2.73843	0.363424	0.393721	0.843749	-3.1889	0.219243
AMD1_1060				#DIV/0!	3	2	3	2.66667		2	1	1.5	-3.24947	0.209849	1.19056	0.41541	-4.5015	0.0132263
AMD1_1068				#DIV/0!	1	1	1	1				#DIV/0!			3.11323	0.19086	-3.1889	0.219243
AMD1_1072	1			1				#DIV/0!		1		1	-0.126005	0.957489	-1.92343	0.531372	1.85922	0.54854
AMD1_1074	1			1		1	1	1	1	2	2	1.66667	-2.11057	0.261159	-1.29433	0.483727	-0.821727	0.753146
AMD1_1075	1			1				#DIV/0!	1	1	1	1	-1.4356	0.543728	-3.22955	0.148116	1.85922	0.54854
AMD1_1077	27	26	27	26.6667	22	26	23	23.6667	29	25	24	26	-0.136011	0.751788	-0.265156	0.531372	0.129194	0.771132
AMD1_1078	4	4	4	4	4	3	5	4	8	8	6	7.33333	-1.02357	0.194112	-0.98223	0.186158	-0.0410552	0.988472
AMD1_1082	21	24	35	26.6667	44	34	34	37.3333	33	33	38	34.6667	-0.549437	0.0800724	-0.0238374	0.96642	-0.525691	0.0948304
AMD1_1087	29	22	24	25	21	25	24	23.3333	5	5	5	5	2.12286	4.38282e-08	2.06558	1.12899e-07	0.0569038	0.911656
AMD1_1088				#DIV/0!			2	2				#DIV/0!			2.60931	0.381271	-2.68094	0.379378
AMD1_1089	3	1	2	2	3	2	1	2	2	2	1	1.66667	0.084102	0.957489	0.123728	0.956433	-0.0398522	0.988472
AMD1_1091	4	7	6	5.66667	7	8	10	8.33333	1	1	2	1.33333	1.82577	0.0656907	2.41178	0.00106918	-0.587963	0.446055
AMD1_1095	5	3	4	4	1	2	2	1.66667	4	2	4	3.33333	0.0868806	0.957489	-1.0727	0.360621	1.16287	0.347189
AMD1_1097	1		1	1	1	2	2	1.66667		1	2	1.5	-0.656913	0.753136	0.552367	0.744121	-1.21586	0.534892
AMD1_1102	1			1				#DIV/0!		1		1	-0.126005	0.957489	-1.92343	0.531372	1.85922	0.54854
AMD1_1106		1	2	1.5	2	2	2	2	2	3	2	2.33333	-1.28696	0.398662	-0.333894	0.803053	-0.956283	0.54854
AMD1_1107				#DIV/0!				#DIV/0!	1			1	-1.93988	0.543728	-1.92343	0.531372
AMD1_1108				#DIV/0!		1		1				#DIV/0!			1.82825	0.544165	-1.89001	0.54854
AMD1_1109				#DIV/0!	1		2	1.5		1	1	1	-2.73843	0.363424	0.393717	0.843749	-3.18889	0.219243
AMD1_1114				#DIV/0!				#DIV/0!	2	1	1	1.33333	-3.62608	0.100903	-3.60561	0.079583
AMD1_1116		2	2	2	2	2	2	2	1		1	1	0.729284	0.69208	1.30785	0.45424	-0.582425	0.717004
AMD1_1118		1	1	1	1	1	1	1		1		1	0.652684	0.786205	1.1898	0.545322	-0.543609	0.798177
AMD1_1120	2	4	2	2.66667	2		2	2	3	2	4	3	-0.328585	0.784648	-1.22217	0.335634	0.89723	0.54854
AMD1_1121	3	2		2.5	1	2	1	1.33333	1		1	1	1.0249	0.543728	0.766464	0.673882	0.257933	0.884001
AMD1_1122				#DIV/0!				#DIV/0!	1			1	-1.93988	0.543728	-1.92343	0.531372
AMD1_1129		1		1				#DIV/0!	1	1	1	1	-1.4356	0.543728	-3.22955	0.148116	1.85922	0.54854
AMD1_1146			1	1		1		1				#DIV/0!	1.81387	0.543728	1.82825	0.544165	-0.030795	0.988472
AMD1_1186				#DIV/0!				#DIV/0!			1	1	-1.93988	0.543728	-1.92343	0.531372
AMD1_1202	5	5	3	4.33333	8	13	8	9.66667	7	6	7	6.66667	-0.776431	0.363424	0.398987	0.544165	-1.17653	0.0817047
AMD1_1206	8	7	9	8	9	5	11	8.33333	10	12	13	11.6667	-0.708269	0.253578	-0.608517	0.333646	-0.0997009	0.908923
AMD1_1208		1		1	1			1		1		1	-0.126006	0.957489	-0.0951818	0.967675	-0.0307952	0.988472
AMD1_1213	8	15	12	11.6667	12	10	12	11.3333	16	11	10	12.3333	-0.250744	0.664939	-0.250186	0.6639	-0.000517377	0.998805
AMD1_1215	23	24	26	24.3333	31	29	44	34.6667	16	18	18	17.3333	0.314283	0.535562	0.86466	0.00263758	-0.550551	0.0918682
AMD1_1219				#DIV/0!				#DIV/0!			1	1	-1.93988	0.543728	-1.92343	0.531372
AMD1_1220	7	8	6	7	4	2	3	3	6	5	6	5.66667	0.12911	0.915148	-1.01694	0.250559	1.14791	0.17761
AMD1_1222				#DIV/0!			1	1				#DIV/0!			1.82825	0.544165	-1.89001	0.54854
AMD1_1223	1	2	2	1.66667	2		1	1.5	3	4	5	4	-1.36763	0.22841	-1.99609	0.0653986	0.632866	0.717483
AMD1_1227	2	1	1	1.33333	1	2	2	1.66667		1		1	1.52784	0.505133	1.85848	0.333646	-0.33603	0.851951
AMD1_1230	13	18	12	14.3333	23	33	41	32.3333	44	39	39	40.6667	-1.66854	7.78869e-11	-0.460097	0.0934805	-1.20874	7.50102e-05
AMD1_1231				#DIV/0!				#DIV/0!	1			1	-1.93988	0.543728	-1.92343	0.531372
AMD1_1232	22	20	21	21	23	28	35	28.6667	24	28	24	25.3333	-0.441435	0.275352	0.0472578	0.937582	-0.488808	0.205491
AMD1_1233			2	2			1	1	1			1	0.652685	0.793279	-0.0951838	0.967675	0.75528	0.773004
AMD1_1237	18	19	16	17.6667	30	30	31	30.3333	18	16	22	18.6667	-0.250897	0.569177	0.566601	0.0950874	-0.817741	0.0133038
AMD1_1244			1	1	1	1	3	1.66667	1		1	1	-0.924563	0.69208	1.0624	0.531372	-2.00193	0.318369
AMD1_1245	45	60	73	59.3333	81	77	73	77	62	81	66	69.6667	-0.404041	0.0549888	0.0135364	0.967675	-0.417612	0.0437358
AMD1_1246	4	5	7	5.33333	4	5	5	4.66667	4	8	5	5.66667	-0.254858	0.783744	-0.401181	0.634342	0.146629	0.88676
AMD1_1247	40	59	66	55	90	89	93	90.6667	56	75	64	65	-0.413348	0.0583469	0.348715	0.0620639	-0.762132	3.44814e-06
AMD1_1248	1	1	1	1	2	4	2	2.66667	3	1	2	2	-1.07605	0.543728	0.269597	0.836287	-1.35025	0.379378
AMD1_1249	2	1	2	1.66667			1	1	1			1	1.82345	0.363424	-0.0951838	0.967675	1.93176	0.34489
AMD1_1250				#DIV/0!				#DIV/0!	1	1		1	-2.73843	0.363424	-2.71951	0.333646
AMD1_1252				#DIV/0!				#DIV/0!	1	1		1	-2.73843	0.363424	-2.71951	0.333646
AMD1_1255	2	5	6	4.33333	6	6	4	5.33333	3	5	6	4.66667	-0.272532	0.784648	0.060293	0.96642	-0.333225	0.741726
AMD1_1270				#DIV/0!				#DIV/0!	1			1	-1.93988	0.543728	-1.92343	0.531372
AMD1_1295	9	8	10	9	2	9	3	4.66667	12	6	5	7.66667	0.0572845	0.957489	-0.829486	0.360621	0.887794	0.22567
AMD1_1296	4	2	4	3.33333	2	5	2	3	7	5	4	5.33333	-0.826462	0.398662	-0.931334	0.333646	0.10549	0.959322
AMD1_1299	3	3	3	3	2	2	2	2	2	2		2	0.937239	0.543728	0.421754	0.781206	0.516145	0.698719
AMD1_1300		1	1	1	2	1	2	1.66667	1	2	1	1.33333	-1.03352	0.543728	0.176305	0.94051	-1.21586	0.534892
AMD1_1301	5	5	5	5	4	3	4	3.66667	3	2	2	2.33333	0.893199	0.398662	0.499788	0.655556	0.393594	0.702815
AMD1_1305				#DIV/0!				#DIV/0!	1	1		1	-2.73843	0.363424	-2.71951	0.333646
AMD1_1310	9	8	3	6.66667	5	5	5	5	9	8	12	9.66667	-0.698279	0.324759	-1.06242	0.0803442	0.36478	0.67303
AMD1_1312	1			1				#DIV/0!				#DIV/0!	1.81387	0.543728			1.85922	0.54854
AMD1_1319	15	16	11	14	6	6	6	6	14	13	14	13.6667	-0.137182	0.807284	-1.29993	0.00660042	1.16375	0.0331241
AMD1_1323	6	6	2	4.66667	3	2	3	2.66667	10	8	7	8.33333	-0.989495	0.183141	-1.7262	0.0087719	0.738562	0.522802
AMD1_1325				#DIV/0!				#DIV/0!		1	1	1	-2.73843	0.363424	-2.71951	0.333646
AMD1_1329	2			2				#DIV/0!	1	2	1	1.33333	-1.03352	0.543728	-3.60561	0.079583	2.64529	0.380162
AMD1_1330	5	5	3	4.33333		1	1	1	8	7	10	8.33333	-1.09335	0.132061	-3.537	7.36236e-06	2.45514	0.040949
AMD1_1331		1		1				#DIV/0!			1	1	-0.126007	0.957489	-1.92343	0.531372	1.85922	0.54854
AMD1_1332	83	82	90	85	48	65	69	60.6667	166	184	184	178	-1.23825	7.04905e-17	-1.68164	1.22282e-21	0.44346	0.0209819
AMD1_1333	52	76	59	62.3333	38	33	31	34	52	60	53	55	0.00735952	0.975149	-0.822325	5.57306e-05	0.829823	7.50102e-05
AMD1_1338	2	1	1	1.33333				#DIV/0!				#DIV/0!	3.46772	0.154995			3.52512	0.122697
AMD1_1339	1			1	1			1	1	1	1	1	-1.4356	0.543728	-1.4013	0.531372	-0.0307943	0.988472
AMD1_1341		1	1	1	1	1	1	1	1		1	1	-0.145873	0.957489	0.393721	0.843749	-0.543609	0.798177
AMD1_1344	3	1	2	2	1	1	1	1	3	2	3	2.66667	-0.557892	0.653819	-1.43187	0.318311	0.878797	0.54854
AMD1_1349				#DIV/0!	1	1	2	1.33333				#DIV/0!			3.48597	0.110922	-3.56383	0.122697
AMD1_1351	4	5	4	4.33333	3	7	2	4	4	5	7	5.33333	-0.460739	0.578576	-0.53143	0.544165	0.0709986	0.981878
AMD1_1353	11	13	19	14.3333	16	21	16	17.6667				#DIV/0!	6.77058	5.93735e-12	7.08966	4.29677e-15	-0.341318	0.54854
AMD1_1354	2	3	2	2.33333			1	1	3	2		2.5	0.293632	0.855673	-2.07539	0.25037	2.38773	0.157367
AMD1_1355	38	40	39	39	34	35	36	35	46	48	48	47.3333	-0.451255	0.0920807	-0.564605	0.0173881	0.113393	0.753146
AMD1_1356	10	12	10	10.6667	2	3	4	3	14	14	9	12.3333	-0.378507	0.543728	-2.12276	6.6011e-05	1.74674	0.00616656
AMD1_1358	7	4	7	6	7	7	6	6.66667	4	7	6	5.66667	-0.088823	0.9572	0.101557	0.932746	-0.190576	0.835076
AMD1_1360	3	4	6	4.33333	7	8	8	7.66667	3	2	3	2.66667	0.508492	0.610944	1.35394	0.074362	-0.846836	0.308626
AMD1_1361		1	2	1.5	1	1	3	1.66667	2	3	3	2.66667	-1.47093	0.313376	-0.763189	0.544165	-0.709887	0.674402
AMD1_1364	29	35	35	33	37	48	50	45	34	35	34	34.3333	-0.229482	0.543728	0.258637	0.420892	-0.488202	0.0834907
AMD1_1366		3	3	3	4	3	7	4.66667	3	3	2	2.66667	-0.557894	0.653819	0.653185	0.531372	-1.2136	0.24809
AMD1_1367	4	4	5	4.33333	3	2	3	2.66667	2	2	3	2.33333	0.692465	0.543728	0.0588523	0.967675	0.634579	0.54854
AMD1_1369				#DIV/0!	1	1	1	1	1		2	1.5	-3.24947	0.209849	-0.116317	0.96642	-3.1889	0.219243
AMD1_1370	1	1	1	1	1		1	1				#DIV/0!	3.09551	0.246228	2.60931	0.360621	0.470317	0.834823
AMD1_1371	2	1	2	1.66667	4	3	3	3.33333	3	2	3	2.66667	-0.80311	0.543728	0.183398	0.892375	-0.988875	0.431849
AMD1_1374	4	5	3	4		3	2	2.5	3	1	3	2.33333	0.580551	0.576017	-0.579342	0.6639	1.16287	0.347189
AMD1_1375	13	16	13	14	12	18	17	15.6667	11	12	13	12	0.0487351	0.957489	0.251521	0.630984	-0.202897	0.717483
AMD1_1377	16	20	28	21.3333	47	32	49	42.6667	47	46	40	44.3333	-1.22335	1.98806e-07	-0.185603	0.531372	-1.03794	6.09646e-05
AMD1_1378			2	2	2	3	6	3.66667	9	8	7	8	-3.51766	1.48215e-05	-1.22723	0.0772938	-2.29817	0.0732568
AMD1_1381				#DIV/0!		1		1	1			1	-1.93988	0.543728	-0.095181	0.967675	-1.89001	0.54854
AMD1_1384	4	4	4	4	1	2	4	2.33333	2	5	3	3.33333	0.0868787	0.957489	-0.617561	0.557898	0.706096	0.54854
AMD1_1386	1			1	1	1	1	1	2	1	2	1.66667	-2.11057	0.261159	-0.790408	0.601155	-1.32968	0.54854
AMD1_1387	7	5	5	5.66667	12	12	17	13.6667	10	11	11	10.6667	-1.06818	0.0814261	0.224375	0.695872	-1.29343	0.0156178
AMD1_1388	28	27	31	28.6667	33	36	41	36.6667	27	35	36	32.6667	-0.360165	0.330103	0.035661	0.947827	-0.395896	0.233965
AMD1_1389				#DIV/0!		1		1	1	1	1	1	-3.24947	0.194112	-1.4013	0.531372	-1.89001	0.54854
AMD1_1391	1	1	1	1	1		1	1	1	1	1	1	-0.153966	0.957489	-0.620237	0.758128	0.470317	0.834823
AMD1_1399	1	2	1	1.33333				#DIV/0!	1			1	1.52784	0.505133	-1.92343	0.531372	3.52512	0.122697
AMD1_1414	1	1	1	1				#DIV/0!				#DIV/0!	3.09551	0.246228			3.15126	0.219243
AMD1_1415	1	1	1	1	2	2	2	2	3	2	3	2.66667	-1.47093	0.313376	-0.517738	0.675242	-0.956283	0.54854
AMD1_1416	7	4	7	6	7	7	9	7.66667	5	5	6	5.33333	-0.00318989	0.995402	0.385169	0.601155	-0.388787	0.605948
AMD1_1417	6	4	7	5.66667	2		4	3	2	3	4	3	0.722265	0.499202	-0.680787	0.545102	1.40588	0.139188
AMD1_1419	1	3		2	1	2	1	1.33333	2	3	2	2.33333	-0.914747	0.543728	-0.875283	0.531372	-0.0387131	0.988472
AMD1_1420	2	2		2				#DIV/0!	1	1	2	1.33333	-0.158359	0.9572	-3.60561	0.079583	3.52512	0.122697
AMD1_1423	2	1	2	1.66667	2	2	2	2	2	5	3	3.33333	-1.11281	0.377295	-0.827254	0.531372	-0.285779	0.861684
AMD1_1427	2	1	1	1.33333	2	2	2	2	1	1	1	1	0.218247	0.941485	0.797816	0.58255	-0.582423	0.717004
AMD1_1428	1	1	1	1	2	3	2	2.33333	5	3	4	4	-2.03545	0.0725838	-0.872254	0.440622	-1.16667	0.448853
AMD1_1432		1	1	1	1			1	3	1	1	1.66667	-1.33188	0.479425	-2.07539	0.25037	0.755277	0.771132
AMD1_1435	4	5	6	5	7	7	6	6.66667	9	6	11	8.66667	-0.948434	0.194112	-0.501082	0.531372	-0.447652	0.566839
AMD1_1445				#DIV/0!	1		1	1				#DIV/0!			2.60931	0.360621	-2.68094	0.379378
AMD1_1446	1			1				#DIV/0!				#DIV/0!	1.81387	0.543728			1.85922	0.54854
AMD1_1449	1	2	2	1.66667		1		1		1		1	1.82345	0.363424	-0.0951818	0.967675	1.93175	0.34489
AMD1_1451			1	1				#DIV/0!				#DIV/0!	1.81387	0.543728			1.85922	0.54854
AMD1_1455	1		2	1.5	1			1	2	1	2	1.66667	-0.828938	0.578576	-2.07539	0.25037	1.26125	0.54854
AMD1_1457	1	2	2	1.66667	2	2	2	2	2	3	2	2.33333	-0.619139	0.637582	-0.333894	0.803053	-0.28578	0.861684
AMD1_1458			1	1				#DIV/0!	1		1	1	-0.924563	0.69208	-2.71951	0.333646	1.85922	0.54854
AMD1_1461	1	2	2	1.66667	2	1	3	2	4	4	5	4.33333	-1.47994	0.179418	-1.19422	0.25037	-0.285777	0.861684
AMD1_1462	22	27	26	25	27	28	28	27.6667	30	28	30	29.3333	-0.401943	0.288209	-0.214295	0.544165	-0.187673	0.63743
AMD1_1466		1	2	1.5	3	1	2	2	3	4	1	2.66667	-1.47093	0.313376	-0.517737	0.675242	-0.956283	0.54854
AMD1_1467	1	1	1	1	1		1	1		1	1	1	0.357073	0.889923	-0.110201	0.967675	0.470317	0.834823
AMD1_1473	2	3	5	3.33333	4	1	1	2	3	2	3	2.66667	0.142764	0.941485	-0.517735	0.675242	0.66228	0.557865
AMD1_1484	1	3	5	3	5	5	5	5	7	6	5	6	-1.13882	0.199204	-0.385073	0.641162	-0.754676	0.466041
AMD1_1490	2	2	1	1.66667	1	1	1	1		1		1	1.82345	0.363424	1.1898	0.545322	0.632867	0.717483
AMD1_1492	1	2		1.5		2	2	2				#DIV/0!	3.09551	0.261159	3.48597	0.110922	-0.412569	0.834823
AMD1_1498	1	2	1	1.33333				#DIV/0!	1	1		1	0.729286	0.69208	-2.71951	0.333646	3.52512	0.122697
AMD1_1506		2	1	1.5			1	1	2	3	1	2	-1.07605	0.543728	-2.32227	0.148116	1.26125	0.54854
AMD1_1516	61	55	49	55	50	49	55	51.3333	43	53	42	46	0.0844073	0.784648	0.0273413	0.956433	0.0570708	0.861684
AMD1_1517	22	21	21	21.3333	23	18	21	20.6667	25	17	22	21.3333	-0.172175	0.69208	-0.1756	0.689543	0.00344204	0.990631
AMD1_1520	88	91	89	89.3333	109	103	127	113	80	78	75	77.6667	0.028676	0.941485	0.409538	0.00683788	-0.380892	0.0180725
AMD1_1521	31	27	25	27.6667	41	45	47	44.3333	24	21	20	21.6667	0.178581	0.658834	0.898391	0.000255466	-0.719982	0.00585007
AMD1_1524				#DIV/0!			1	1				#DIV/0!			1.82825	0.544165	-1.89001	0.54854
AMD1_1526	2	2	2	2	5	4	3	4	1		2	1.5	0.759072	0.609591	1.75289	0.122813	-0.997389	0.379378
AMD1_1527	1			1				#DIV/0!				#DIV/0!	1.81387	0.543728			1.85922	0.54854
AMD1_1530	1			1				#DIV/0!	3	1	1	1.66667	-2.11057	0.261159	-3.90364	0.0443982	1.85922	0.54854
AMD1_1549	11	15	18	14.6667	10	14	13	12.3333	24	16	19	19.6667	-0.592016	0.194112	-0.797556	0.0471373	0.205722	0.734939
AMD1_1551				#DIV/0!	1	1	1	1		1		1	-1.93988	0.543728	1.1898	0.545322	-3.1889	0.219243
AMD1_1552	1	3	2	2	2	3	3	2.66667	4	2	3	3	-0.721037	0.543728	-0.288033	0.803053	-0.433812	0.753146
AMD1_1553		1	2	1.5	1	4	4	3	3	4	2	3	-1.63408	0.226221	-0.125617	0.943038	-1.51307	0.278926
AMD1_1561	31	31	36	32.6667	11	13	18	14	54	62	58	58	-0.998505	5.40349e-07	-2.17105	1.31842e-17	1.17301	0.000150999
AMD1_1568	9	8	5	7.33333	4	4	6	4.66667	4	3	4	3.66667	0.80714	0.363424	0.210709	0.835723	0.596897	0.504954
AMD1_1570	2	2	2	2	2	2	2	2	3	2	3	2.66667	-0.557893	0.653819	-0.517738	0.675242	-0.0398503	0.988472
AMD1_1575	2	3		2.5				#DIV/0!	2	1		1.5	0.513857	0.776992	-3.22955	0.163558	3.82176	0.0800239
AMD1_1580	9	9	3	7				#DIV/0!	13	11	13	12.3333	-0.976949	0.0829437	-6.70529	4.36617e-12	5.81225	6.11898e-06
AMD1_1581	1	1	1	1				#DIV/0!	1	2	1	1.33333	-0.530571	0.776992	-3.60561	0.079583	3.15126	0.219243
AMD1_1582				#DIV/0!				#DIV/0!			1	1	-1.93988	0.543728	-1.92343	0.531372
AMD1_1588				#DIV/0!				#DIV/0!		1	1	1	-2.73843	0.363424	-2.71951	0.333646
AMD1_1595				#DIV/0!				#DIV/0!	1			1	-1.93988	0.543728	-1.92343	0.531372
AMD1_1602	1			1	2		1	1.5	1		1	1	-0.924563	0.69208	0.393721	0.843749	-1.32968	0.54854
AMD1_1604	3	5	2	3.33333		1	1	1	12	7	9	9.33333	-1.62043	0.0108394	-3.69831	1.02417e-06	2.08888	0.122697
AMD1_1606				#DIV/0!				#DIV/0!			1	1	-1.93988	0.543728	-1.92343	0.531372
AMD1_1609	11	11	9	10.3333	15	17	21	17.6667	17	20	21	19.3333	-1.06733	0.0080247	-0.259163	0.545102	-0.80848	0.0909622
AMD1_1613	2	1		1.5		1	2	1.5	1		1	1	0.357074	0.889923	0.393718	0.843749	-0.0376328	0.988472
AMD1_1614		3	3	3	1	2	3	2	4	3	2	3	-0.721037	0.543728	-0.680782	0.545102	-0.0398492	0.988472
AMD1_1626	3	2	1	2				#DIV/0!	4	2	3	3	-0.721035	0.543728	-4.70814	0.0026028	4.06769	0.0477841
AMD1_1628			1	1				#DIV/0!			1	1	-0.126006	0.957489	-1.92343	0.531372	1.85922	0.54854
AMD1_1631				#DIV/0!				#DIV/0!			1	1	-1.93988	0.543728	-1.92343	0.531372
AMD1_1632	26	24	25	25	12	9	16	12.3333	18	22	22	20.6667	0.100881	0.82656	-0.868703	0.0226747	0.97	0.00973394
AMD1_1639	36	40	41	39	29	32	38	33	40	47	41	42.6667	-0.3019	0.363424	-0.499829	0.0595672	0.197986	0.54854
AMD1_1640	7	6	6	6.33333	2	2	2	2	4	5	3	4	0.47788	0.560083	-1.08195	0.333646	1.56301	0.0817047
AMD1_1641		1	2	1.5	1	1	2	1.33333	1	2	2	1.66667	-0.82894	0.578576	-0.417668	0.79226	-0.412569	0.834823
AMD1_1642	1	1	1	1	2	1	2	1.66667			1	1	1.15563	0.569177	1.85848	0.333646	-0.709889	0.674402
AMD1_1643	2	5	2	3	5	4	5	4.66667	3	5	8	5.33333	-0.972357	0.324759	-0.315579	0.72836	-0.657614	0.54854
AMD1_1645	1	1		1				#DIV/0!				#DIV/0!	2.59256	0.398662			2.64529	0.379378
AMD1_1646	9	6	8	7.66667	7	10	9	8.66667	8	9	8	8.33333	-0.28896	0.687352	-0.0731863	0.946941	-0.215903	0.776628
AMD1_1648		1	1	1				#DIV/0!				#DIV/0!	2.59256	0.398662			2.64529	0.379378
AMD1_1680	1	2	1	1.33333				#DIV/0!	1			1	1.52784	0.505133	-1.92343	0.531372	3.52512	0.122697
AMD1_1681		1		1	3	1	3	2.33333	2	1	3	2	-2.35769	0.183141	0.0865418	0.96642	-2.45871	0.134416
AMD1_1685		1	1	1	2	2	4	2.66667	3	2	1	2	-1.57899	0.363424	0.269592	0.836287	-1.85621	0.219243
AMD1_1688	1			1				#DIV/0!				#DIV/0!	1.81387	0.543728			1.85922	0.54854
AMD1_1689	9	11	10	10	8	10	14	10.6667	7	7	7	7	0.336359	0.607883	0.470007	0.531372	-0.133822	0.857994
AMD1_1693	1		1	1	1	1	1	1		1	1	1	-0.145873	0.957489	0.39372	0.843749	-0.543608	0.798177
AMD1_1695	12	7	6	8.33333	4	6	5	5	8	4	4	5.33333	0.461993	0.543728	-0.218659	0.803053	0.681313	0.379378
AMD1_1696		1		1	1	2		1.5	2	2	1	1.66667	-2.11057	0.261159	-0.790404	0.601155	-1.32968	0.54854
AMD1_1701		1	2	1.5	2	3	3	2.66667	2	2	1	1.66667	-0.828938	0.578576	0.516472	0.695872	-1.35024	0.379378
AMD1_1702	16	13	13	14	19	18	20	19	14	14	18	15.3333	-0.301856	0.543728	0.177182	0.719995	-0.479221	0.349078
AMD1_1706	1	1		1				#DIV/0!	1			1	0.652686	0.786205	-1.92343	0.531372	2.64529	0.379378
AMD1_1712	1	2	1	1.33333	2	2	2	2	2	3	2	2.33333	-0.914747	0.543728	-0.333894	0.803053	-0.582424	0.717004
AMD1_1713	22	19	18	19.6667	32	32	39	34.3333	28	27	24	26.3333	-0.591056	0.112062	0.250825	0.531372	-0.842078	0.00523789
AMD1_1714	3	4	4	3.66667	2	4	4	3.33333	4	5	5	4.66667	-0.505776	0.571338	-0.59723	0.531372	0.0918787	0.970444
AMD1_1715				#DIV/0!	1		1	1				#DIV/0!			2.60931	0.360621	-2.68094	0.379378
AMD1_1723	1	2	1	1.33333	2	1	3	2	3	3	2	2.66667	-1.09872	0.443211	-0.51774	0.675242	-0.582422	0.717004
AMD1_1724	1			1			1	1	1	1		1	-0.924562	0.69208	-0.891261	0.695872	-0.0307915	0.988472
AMD1_1728				#DIV/0!			1	1				#DIV/0!			1.82825	0.544165	-1.89001	0.54854
AMD1_1729	4	4	3	3.66667	6	5	9	6.66667	5	5	4	4.66667	-0.505774	0.571338	0.375297	0.648876	-0.882181	0.333121
AMD1_1732				#DIV/0!		1	1	1				#DIV/0!			2.60931	0.360621	-2.68094	0.379378
AMD1_1733	18	16	7	13.6667	5	6	5	5.33333	19	20	20	19.6667	-0.69295	0.113339	-1.9873	6.3775e-07	1.2956	0.0176844
AMD1_1736			1	1			1	1		1		1	-0.126006	0.957489	-0.0951846	0.967675	-0.0307923	0.988472
AMD1_1738	8	4	3	5	3	2	3	2.66667	2	3	2	2.33333	0.893201	0.398662	0.0588528	0.967675	0.835552	0.408944
AMD1_1739	15	13	14	14	12	9	9	10	15	10	16	13.6667	-0.137182	0.807284	-0.575317	0.316973	0.438434	0.47312
AMD1_1740	13	15	17	15	11	8	13	10.6667	12	10	11	11	0.27163	0.609591	-0.173246	0.782512	0.445101	0.431849
AMD1_1742	1	1	1	1	1	1	1	1				#DIV/0!	3.09551	0.246228	3.11323	0.19086	-0.0376364	0.988472
AMD1_1751	1			1			1	1				#DIV/0!	1.81387	0.543728	1.82825	0.544165	-0.0307915	0.988472
AMD1_1760				#DIV/0!				#DIV/0!	1			1	-1.93988	0.543728	-1.92343	0.531372
AMD1_1765	1	2	1	1.33333		1	1	1	1	3	2	2	-0.703838	0.610944	-1.54121	0.333646	0.844175	0.653025
AMD1_1769	1		2	1.5				#DIV/0!	2	5	2	3	-1.63408	0.226221	-4.70814	0.0026028	3.15126	0.22567
AMD1_1778	8	13	12	11	19	14	15	16	17	16	11	14.6667	-0.582461	0.288253	-0.00526289	0.991951	-0.57744	0.288843
AMD1_1780	13	15	12	13.3333	22	29	26	25.6667	29	18	19	22	-0.889065	0.0198936	0.0910773	0.834735	-0.980449	0.00616656
AMD1_1784	2	3	2	2.33333	3	3		3	2		2	2	0.591998	0.682487	0.421759	0.781206	0.170193	0.919548
AMD1_1786		1		1			1	1				#DIV/0!	1.81387	0.543728	1.82825	0.544165	-0.0307924	0.988472
AMD1_1789	1	1	1	1		1	2	1.5	1	1		1	0.357074	0.889923	0.393719	0.843749	-0.0376336	0.988472
AMD1_1792	11	15	13	13	9	12	17	12.6667	9	15	8	10.6667	0.111038	0.887995	0.115827	0.849746	-0.0048098	0.990631
AMD1_1795	2	4	4	3.33333	5	5	7	5.66667	4	5	4	4.33333	-0.534065	0.569177	0.24987	0.78655	-0.785018	0.399193
AMD1_1796	19	27	28	24.6667	21	21	24	22	20	20	22	20.6667	0.0816141	0.887422	-0.0404155	0.956433	0.122062	0.792791
AMD1_1797	2	2	3	2.33333	1		1	1	4	2	3	3	-0.511506	0.665019	-2.09883	0.0977367	1.5968	0.34489
AMD1_1798	4	5	4	4.33333	2	2	4	2.66667	2	2	2	2	0.903375	0.445025	0.269591	0.836287	0.634582	0.54854
AMD1_1799				#DIV/0!				#DIV/0!		1	1	1	-2.73843	0.363424	-2.71951	0.333646
AMD1_1800		2	2	2	3	1	1	1.66667	2	2		2	-0.158359	0.9572	0.176309	0.94051	-0.336035	0.851951
AMD1_1801	23	33	31	29	30	18	23	23.6667	36	30	21	29	-0.172439	0.636117	-0.422008	0.23899	0.249654	0.54854
AMD1_1812			1	1			2	2	2	2	2	2	-2.35769	0.183141	-1.54121	0.333646	-0.821725	0.753146
AMD1_1829	1			1				#DIV/0!	1			1	-0.126004	0.957489	-1.92343	0.531372	1.85922	0.54854
AMD1_1831			2	2				#DIV/0!				#DIV/0!	2.59256	0.416127			2.64529	0.380162
AMD1_1833	1			1			1	1				#DIV/0!	1.81387	0.543728	1.82825	0.544165	-0.0307915	0.988472
AMD1_1840	4	1	2	2.33333	1	2	2	1.66667	2	1	1	1.33333	0.592	0.682487	0.176305	0.94051	0.416594	0.776628
AMD1_1847	1			1				#DIV/0!				#DIV/0!	1.81387	0.543728			1.85922	0.54854
AMD1_1848		1	1	1				#DIV/0!	1	2	1	1.33333	-1.03352	0.543728	-3.60561	0.079583	2.64529	0.379378
AMD1_1851	5	4	4	4.33333	1	1	1	1	2	2	2	2	0.903376	0.445025	-1.03729	0.531372	1.94719	0.0914736
AMD1_1863				#DIV/0!				#DIV/0!	1			1	-1.93988	0.543728	-1.92343	0.531372
AMD1_1865	1			1				#DIV/0!	1		1	1	-0.924563	0.69208	-2.71951	0.333646	1.85922	0.54854
AMD1_1875	2	3	5	3.33333	1	1	2	1.33333	1	2	2	1.66667	0.784757	0.543728	-0.417668	0.79226	1.206	0.379378
AMD1_1877	3	8	6	5.66667	1	2	1	1.33333	5	3	4	4	0.320886	0.740023	-1.62334	0.125775	1.94959	0.045958
AMD1_1878	2	1	1	1.33333				#DIV/0!	1		1	1	0.729286	0.69208	-2.71951	0.333646	3.52512	0.122697
AMD1_1887	1			1	2	3	3	2.66667	2	2	2	2	-2.35769	0.183141	0.269593	0.836287	-2.64229	0.0918682
AMD1_1897	9	12	9	10		1		1	16	16	12	14.6667	-0.718248	0.183141	-5.12481	1.59917e-12	4.42908	7.11065e-07
AMD1_1903	1			1				#DIV/0!				#DIV/0!	1.81387	0.543728			1.85922	0.54854
AMD1_1906				#DIV/0!				#DIV/0!		1		1	-1.93988	0.543728	-1.92343	0.531372
AMD1_1909	1			1				#DIV/0!				#DIV/0!	1.81387	0.543728			1.85922	0.54854
AMD1_1915	1			1				#DIV/0!	1		1	1	-0.924563	0.69208	-2.71951	0.333646	1.85922	0.54854
AMD1_1916	2	3	1	2				#DIV/0!				#DIV/0!	4.00855	0.0549888			4.06769	0.0477841
AMD1_1917	12	7	11	10	7	4	5	5.33333	9	7	6	7.33333	0.270333	0.69208	-0.578642	0.496524	0.849796	0.219243
AMD1_1920	3	3	3	3		1	1	1	4	3	2	3	-0.166265	0.934672	-2.09883	0.0977367	1.94274	0.176515
AMD1_1921	1	1		1				#DIV/0!	1		1	1	-0.145872	0.957489	-2.71951	0.333646	2.64529	0.379378
AMD1_1925	4	2	4	3.33333		1	1	1	2	3	1	2	0.537649	0.651311	-1.54121	0.333646	2.08888	0.122697
AMD1_1926	3	4	5	4	4	3	3	3.33333	5	3	6	4.66667	-0.384444	0.690861	-0.597227	0.531372	0.213381	0.861684
AMD1_1930	1	2	2	1.66667		1		1	1	1	1	1	0.513855	0.776992	-1.4013	0.531372	1.93175	0.34489
AMD1_1931		1	2	1.5	3	3	4	3.33333	2	3	2	2.33333	-1.28696	0.398662	0.367239	0.762737	-1.65938	0.214703
AMD1_1932	37	34	32	34.3333	30	32	36	32.6667	41	37	42	40	-0.39225	0.207942	-0.421571	0.144892	0.0293489	0.975233
AMD1_1933				#DIV/0!				#DIV/0!		1		1	-1.93988	0.543728	-1.92343	0.531372
AMD1_1942	1	1		1	1	1		1				#DIV/0!	2.59256	0.398662	2.60931	0.360621	-0.0356573	0.988472
[truncated: 1,065 more rows]

## Sheet: SupTable7
Table S7. Mini-transposon insertion sites in metformin-negative mutants, and characteristics of the corresponding genes
[truncated: 29 more rows]
